# Supplementary material
Source: PubMed Central journal article supplement (PMC10586519)
Supplement: NIHMS1888690-supplement-Supporting_Info.pdf [file NIHMS1888690-supplement-Supporting_Info.pdf]

# Supporting Information

## Asymmetric Ruthenium-Catalyzed Carbonyl Allylations by Gaseous Allene via Hydrogen Auto-Transfer: 1° vs 2° Alcohol Dehydrogenation Streamlines Polyketide Construction

Connor Saldares, Eliezer Ortiz, Catherine G. Santana, Brian Spinello and Michael J. Krische\*  
University of Texas at Austin, Department of Chemistry, Austin, TX 78712, USA

\*Email: mkrische@cm.utexas.edu

### Table of Contents

|                                                                   |     |
|-------------------------------------------------------------------|-----|
| General Information                                               | S2  |
| Spectroscopy, Spectrometry and Data Collection                    | S2  |
| Known Alcohols <b>2a-2r</b>                                       | S3  |
| Products <b>3a-3r</b>                                             | S5  |
| Synthesis of C7-C15 of Spirastrellolide A ( <b>4a, 4b, 5, 6</b> ) | S78 |
| Single Crystal Diffraction Data for <b>3g</b>                     | S83 |
| References                                                        | S88 |

## **General Information**

All reactions were run under an atmosphere of argon, unless otherwise indicated. Resealable pressure tubes (13x100 mm) were purchased from Fischer Scientific (catalog number 14-959-35C) and were flame dried followed by cooling in a desiccator or under a stream of argon prior to use. All commercial reagents Ru<sub>3</sub>(CO)<sub>12</sub>, allyl iodide, SI-J502-1, SI-J502-2, dippf) and anhydrous solvents were used as received from vendors (Strem Chemicals, Fischer Scientific, Sigma Aldrich and Combi-Blocks) without further purification. Purification of reaction products was carried out by flash column chromatography using 40-63 μm silica gel. Analytical thin-layer chromatography (TLC) was carried out using 0.25 mm commercial silica gel plates (Dynamic Absorbents F254).

## **Spectroscopy, Spectrometry, and Data Collection**

Infrared spectra were recorded on a Perkin-Elmer 1600 spectrometer. High-resolution mass spectra (HRMS) were isolated on a Karatos MS9 and are reported as m/z (relative intensity). Accurate masses are reported for the molecular ion (M<sup>+</sup>, M+H, M+Na), or a suitable fragment ion. Proton nuclear magnetic resonance (<sup>1</sup>H NMR) spectra were recorded with a Varian INOVA (400, 500 MHz) spectrometer equipped with a Bruker AVANCE III cryoprobe. Data reported as multiplicity (s = singlet, d = doublet, t = triplet, q = quartet, m = multiplet). Integration and coupling constants were reported in Hertz (Hz). Carbon-13 nuclear magnetic resonance (<sup>13</sup>C NMR) spectra were recorded with a Varian INOVA (101, 126 MHz) spectrometer and were routinely run with broadband decoupling. Fluorine-19 nuclear magnetic resonance (<sup>19</sup>F NMR) spectra were recorded with a Varian INOVA (390, 470 MHz) spectrometer. Deuterium nuclear magnetic resonance (<sup>2</sup>H NMR) spectra were recorded in CHCl<sub>3</sub> solution with a Varian Gemini 500 (92 MHz) spectrometer (relaxation delay 2.00s).

## Known Dienes

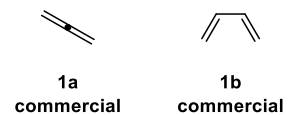

## Known Alcohols

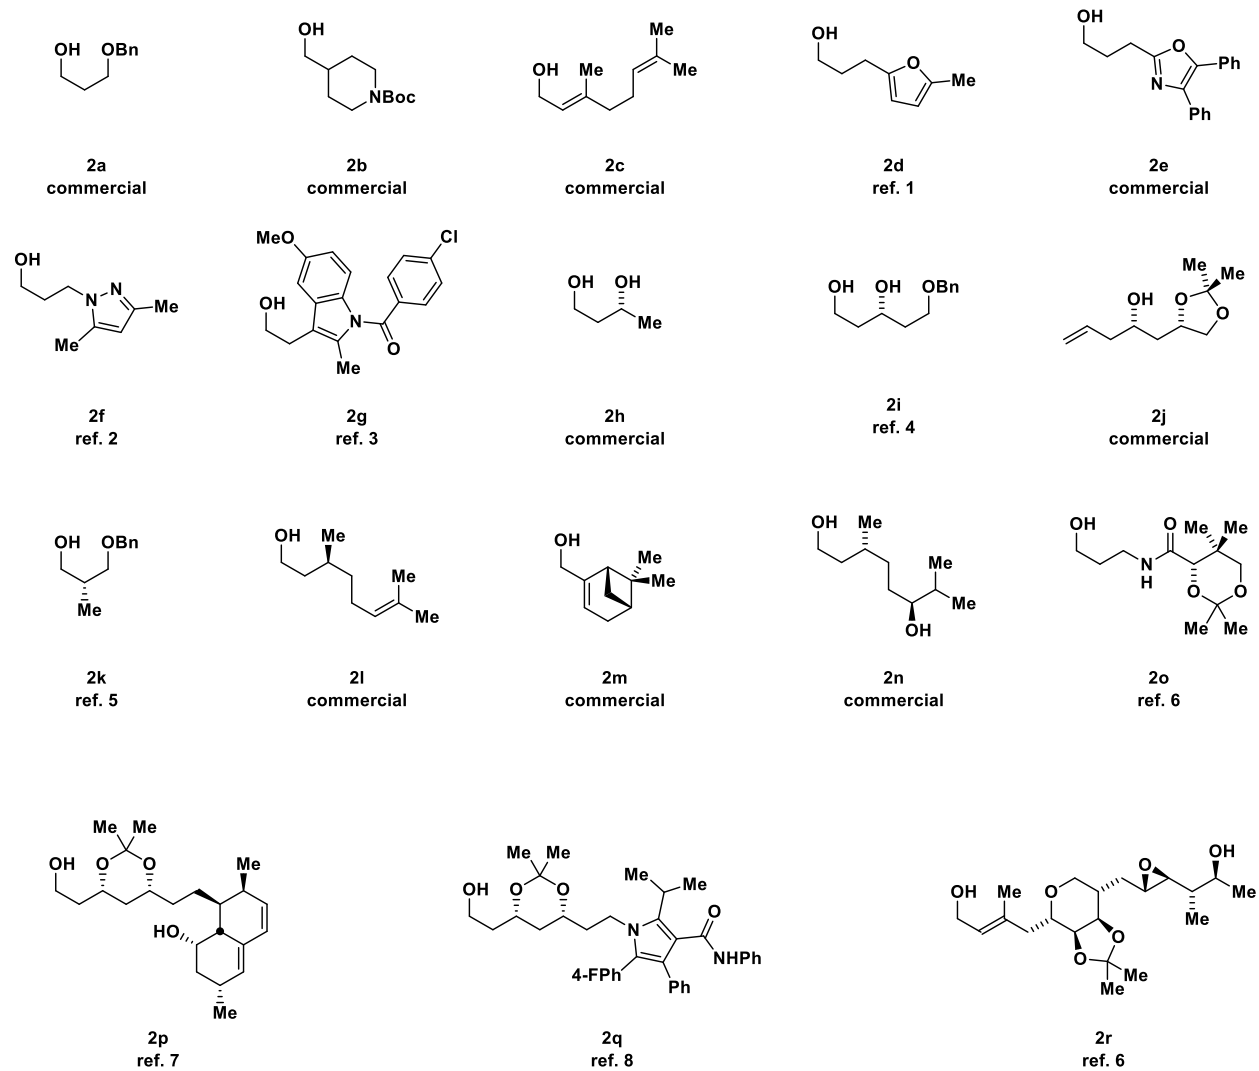

## Products 3a-3r

### General Procedure

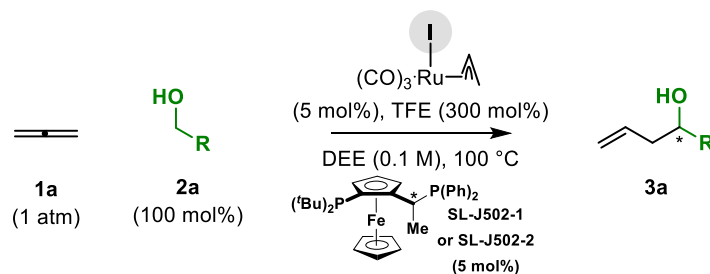

An oven-dried pressure tube equipped with a magnetic stir bar was charged with alcohol **2a-2r** (0.2 mmol, 100 mol%),  $\text{RuI}(\text{CO})_3(\eta^3\text{-C}_3\text{H}_5)$  (0.2 mmol, 5 mol%), **SL-J502-1** (0.2 mmol, 5 mol%) or **SL-J502-2** (0.2 mmol, 5 mol%) under an argon atmosphere. The vessel was evacuated and backfilled with allene gas **1a** (1 atm), followed by the addition of trifluoroethanol (43  $\mu\text{L}$ , 0.6 mmol, 300 mol%) and freshly distilled DEE (2.0 mL, 0.1 M). The reaction mixture was cooled to 0 °C and allowed to stir for 5 minutes. The tube was sealed with a PTFE lined cap and the reaction vessel was placed in a 110 °C bath and stirred for 48 hours. After reaching ambient temperature, the solvent was removed *in vacuo* and the residue was subjected to flash column chromatography ( $\text{SiO}_2$ ) under the noted conditions to furnish products **3a-3r**. Diastereomeric ratios were determined by  $^1\text{H}$  NMR of crude reaction mixtures and enantiomeric excesses were determined by chiral stationary phase HPLC.

**Racemic reactions** were performed using dppf (2.2 mg, 0.01 mmol, 5 mol%) as ligand.

**(S)-1-(benzyloxy)hex-5-en-3-ol (3a)**

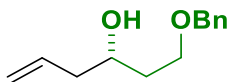

Alcohol **2a** (498.6 mg, 3.0 mmol) was subjected to standard reaction conditions at 1.5 mol% catalyst loading with **SL-J502-01** as ligand (110 °C, 48 h). Upon flash column chromatography (SiO<sub>2</sub>: 5:95 EtOAc:hexanes) the title compound **3a** was isolated as a yellow oil in 87% yield (538.4 mg, 2.61 mmol, 90% ee).

Aldehyde *dehydro-2a* (32.8 mg, 0.2 mmol) was subjected to standard reaction conditions (80°C, 48 h) with HCO<sub>2</sub>H (15 μL, 0.4 mmol, 200 mol%) and **SL-J502-1** as ligand. Upon flash column chromatography (SiO<sub>2</sub>: 3:97 EtOAc:hexanes), the title compound **3a** was isolated as a yellow oil in 80% Yield (33.0 mg, 0.16 mmol, 90% ee).

**TLC (SiO<sub>2</sub>):** R<sub>f</sub> = 0.5 (1:4 EtOAc:hexanes)

**<sup>1</sup>H NMR** (500 MHz, CDCl<sub>3</sub>): δ 7.39 – 7.27 (m, 5H), 5.84 (ddt, J = 17.1, 9.5, 7.0 Hz, 1H), 5.16 – 5.06 (m, 2H), 4.53 (s, 2H), 3.88 (p, J = 6.0 Hz, 1H), 3.72 (dt, J = 10.3, 5.4 Hz, 1H), 3.65 (dt, J = 8.8, 6.2 Hz, 1H), 2.89 (s, 1H), 2.25 (t, J = 6.4 Hz, 2H), 1.77 (dt, J = 8.4, 5.0 Hz, 2H).

**<sup>13</sup>C NMR** (130 MHz, CDCl<sub>3</sub>): δ 138.1, 135.0, 128.6, 127.9, 127.8, 117.7, 73.4, 70.5, 69.1, 42.1, 36.0.

**HRMS** (Na<sup>+</sup>, *m/z*) for C<sub>13</sub>H<sub>18</sub>O<sub>2</sub>: calcd. = 229.1199; found = 229.1208.

**FTIR** (neat): 3433, 3067, 3030, 2917, 2862, 1096, 1027, 996 cm<sup>-1</sup>.

**HPLC:** (Chiralcel columns OB-H, Hexane:2-PrOH = 99:01, 0.5 mL/min, 210 nm).

**[α]<sub>D</sub><sup>24</sup>** = 4.7 (c = 2.26, CHCl<sub>3</sub>).

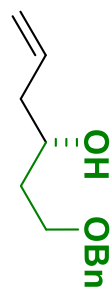

$^1\text{H}$  (500 MHz,  $\text{CDCl}_3$ )

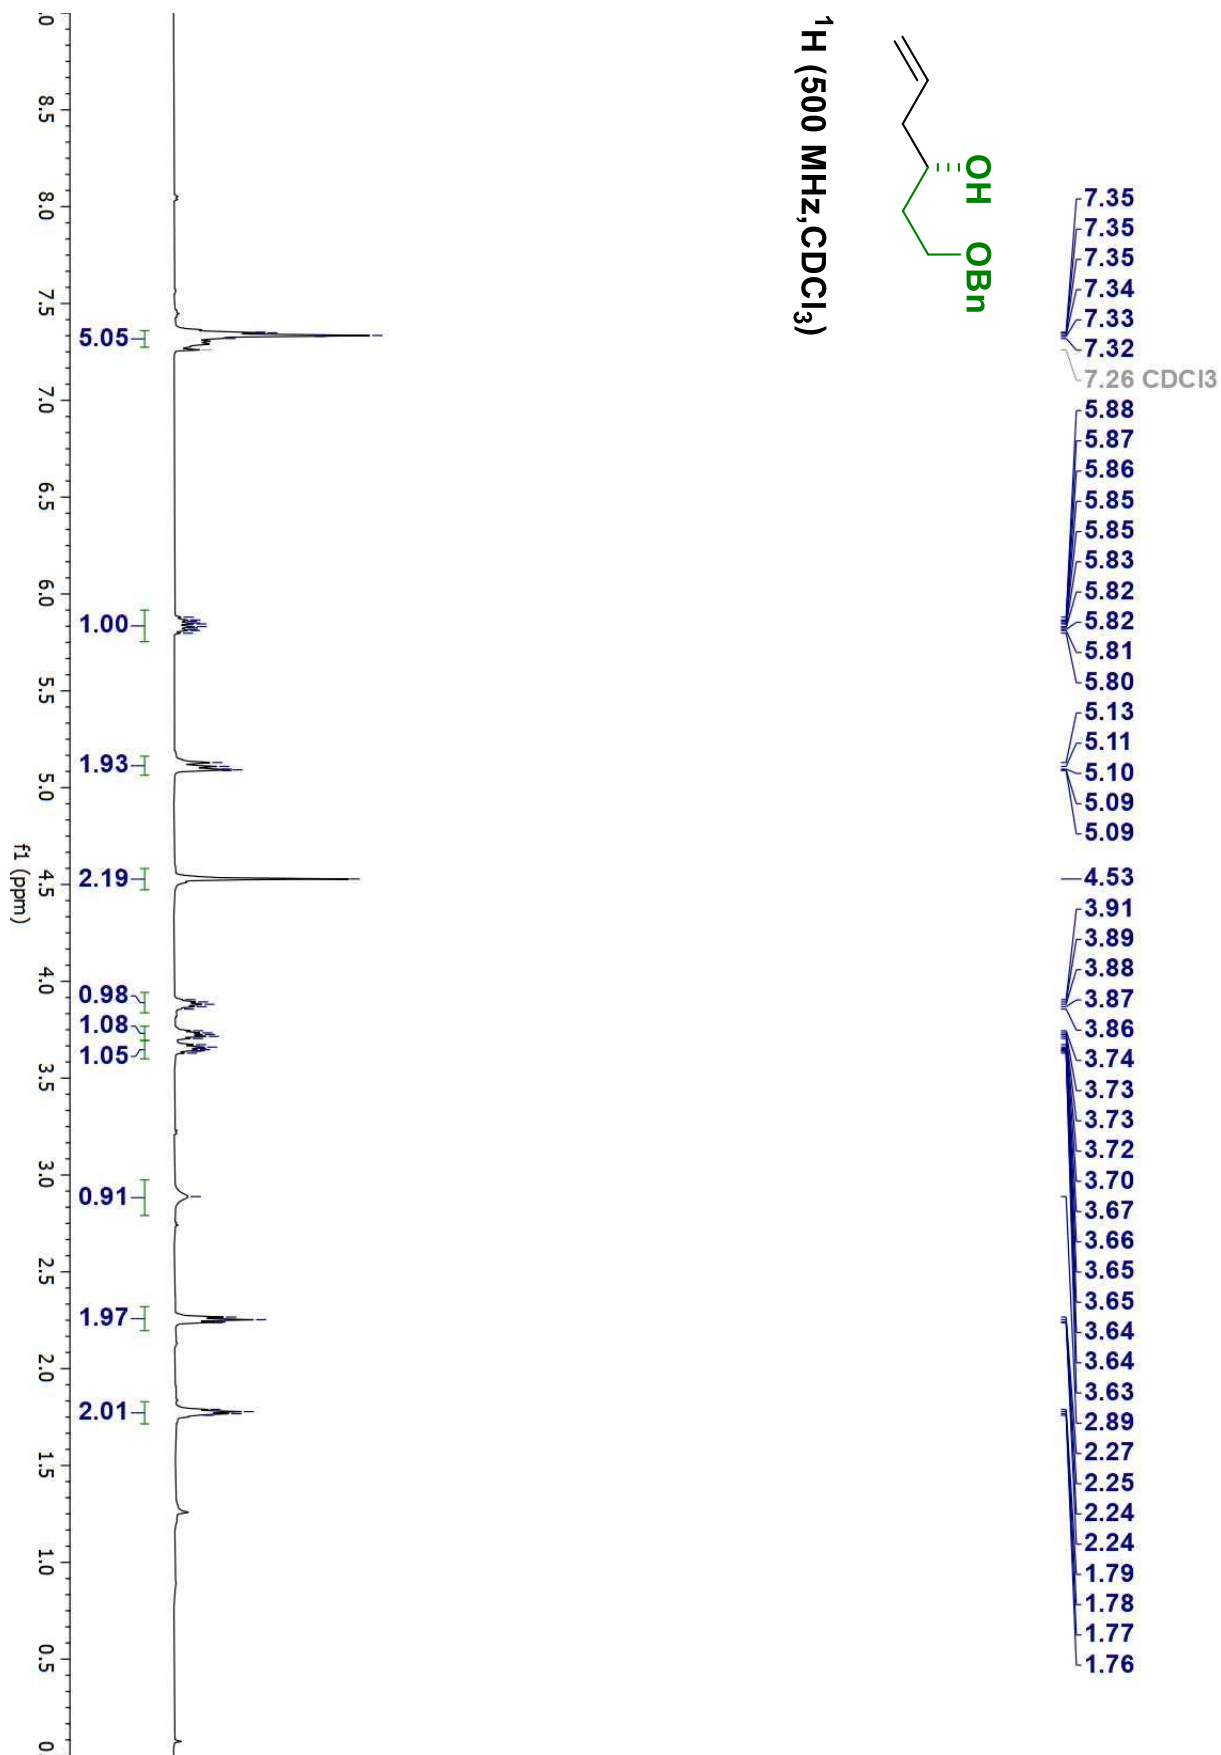

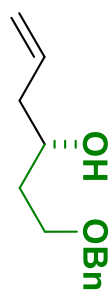

$^{13}\text{C}$  (130 MHz,  $\text{CDCl}_3$ )

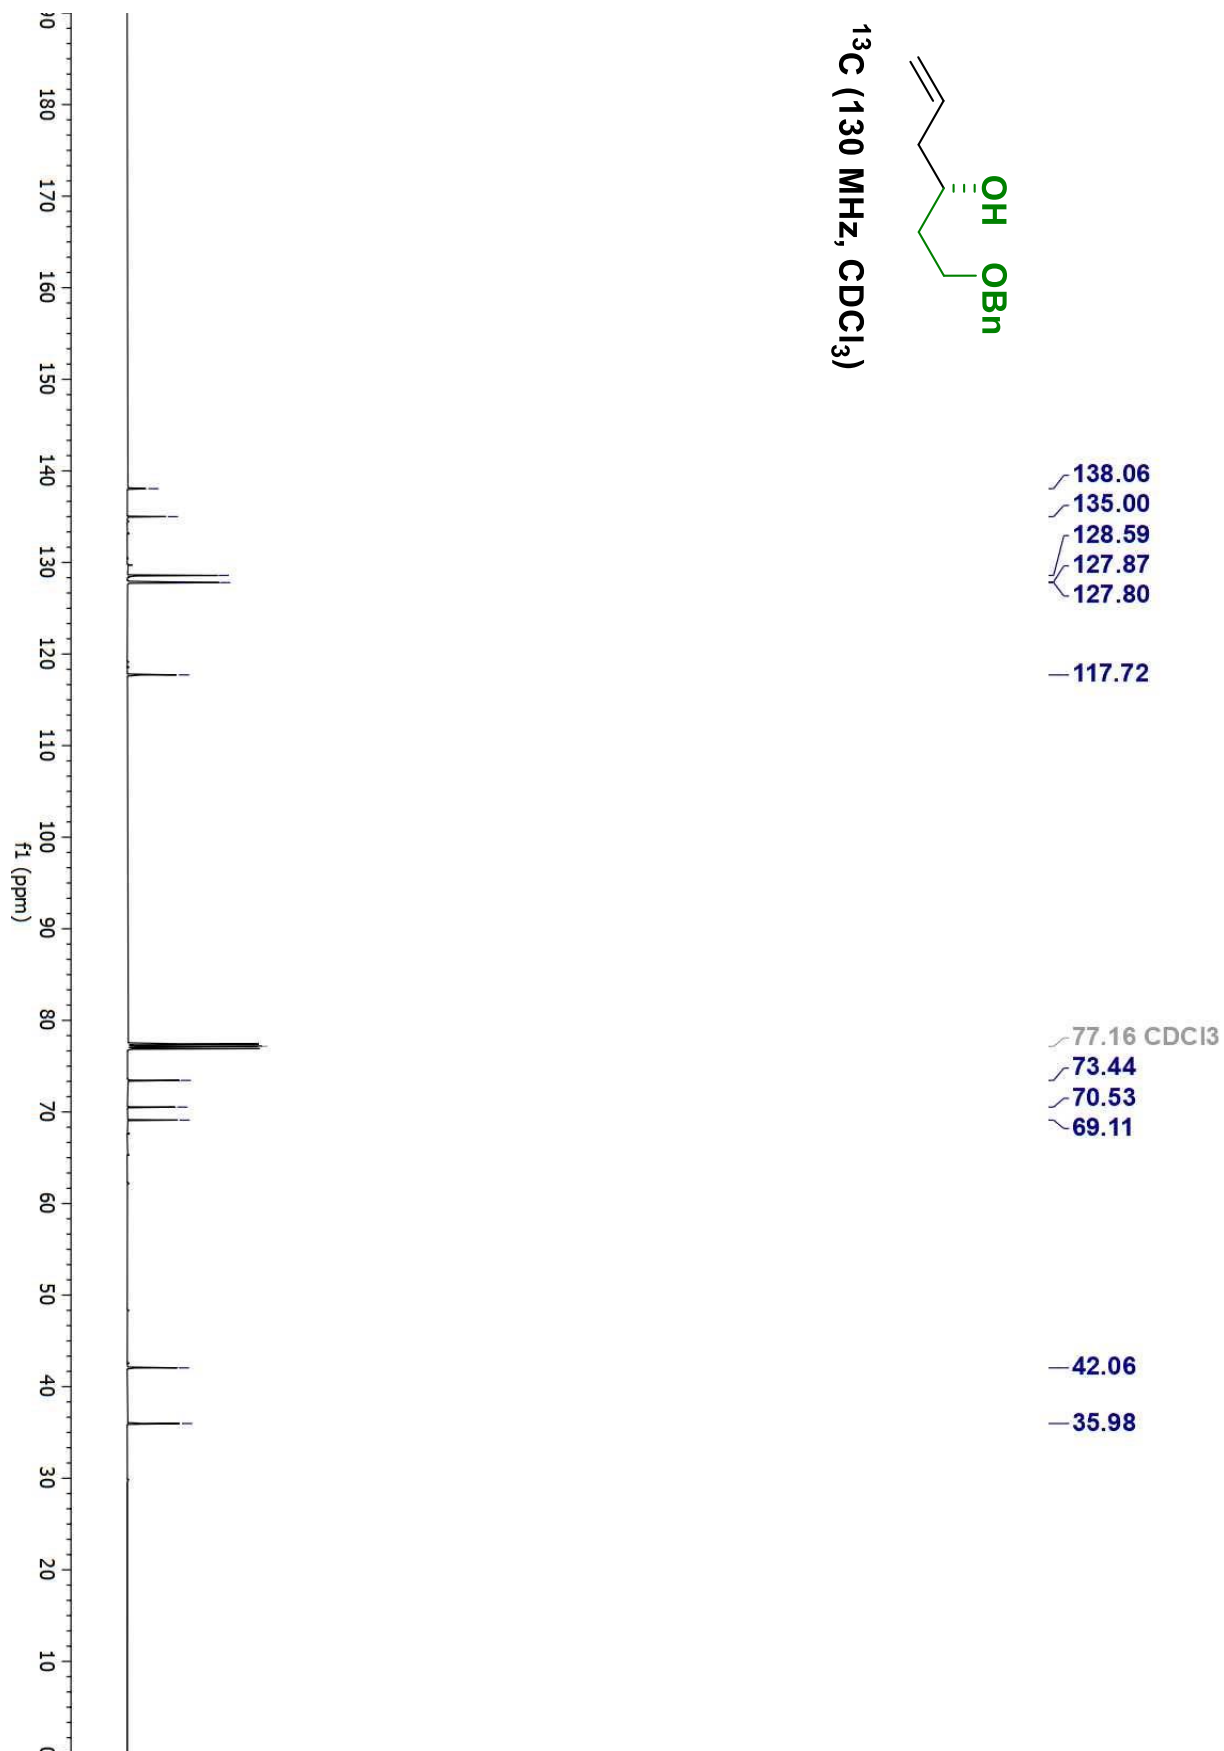

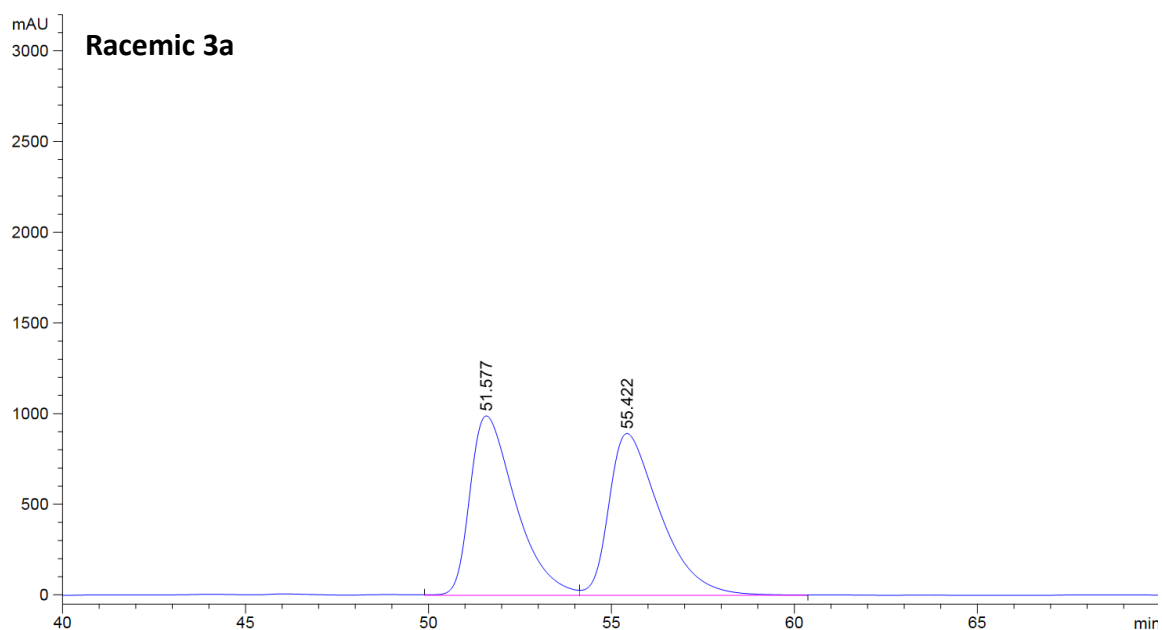

| Peak # | RetTime [min] | Type | Width [min] | Area [mAU*s] | Height [mAU] | Area %  |
|--------|---------------|------|-------------|--------------|--------------|---------|
| 1      | 51.577        | VV   | 1.3141      | 8.60309e4    | 989.74615    | 49.6820 |
| 2      | 55.422        | VB   | 1.4589      | 8.71323e4    | 892.59137    | 50.3180 |

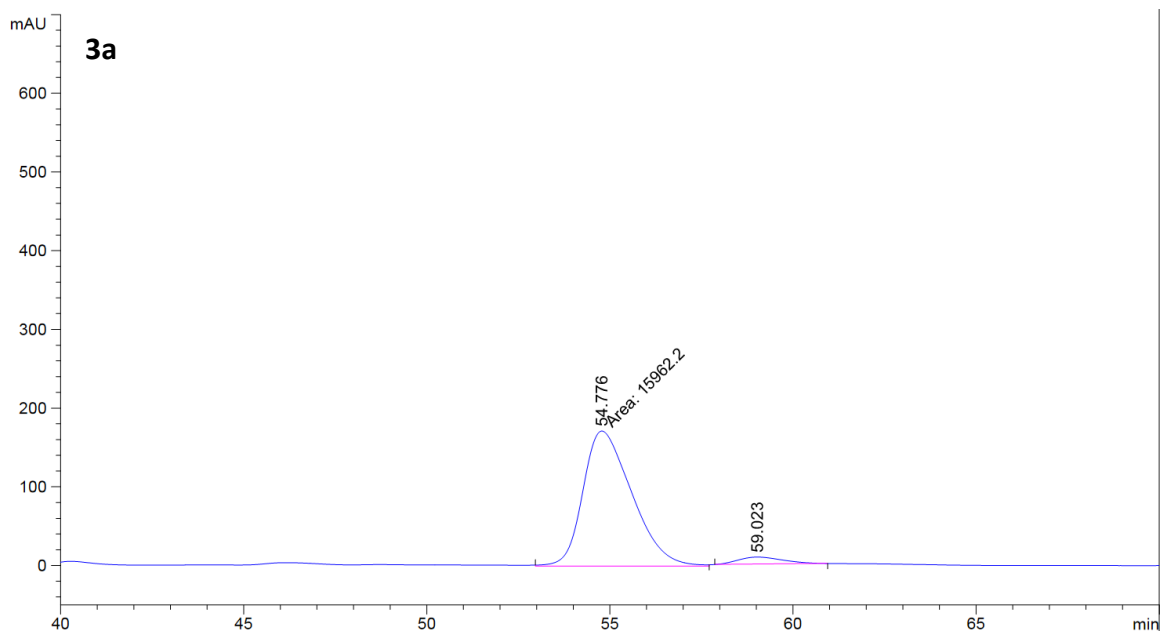

| Peak # | RetTime [min] | Type | Width [min] | Area [mAU*s] | Height [mAU] | Area %  |
|--------|---------------|------|-------------|--------------|--------------|---------|
| 1      | 54.776        | MM   | 1.5490      | 1.59622e4    | 171.75047    | 95.3428 |
| 2      | 59.023        | BB   | 1.0219      | 779.70752    | 9.06148      | 4.6572  |



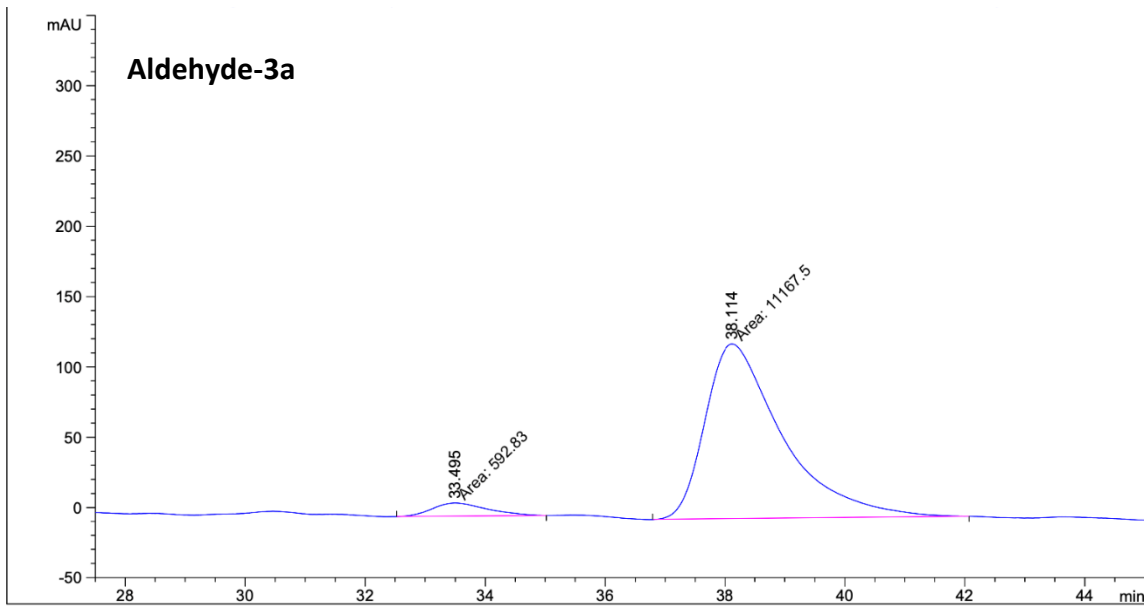

| Peak # | RetTime [min] | Type | Width [min] | Area [mAU*s] | Height [mAU] | Area %  |
|--------|---------------|------|-------------|--------------|--------------|---------|
| 1      | 33.495        | MM   | 1.0540      | 592.82965    | 9.37429      | 5.0409  |
| 2      | 38.114        | MM   | 1.4983      | 1.11675e4    | 124.22681    | 94.9591 |

**tert-butyl (S)-4-(1-hydroxybut-3-en-1-yl)piperidine-1-carboxylate (3b)**

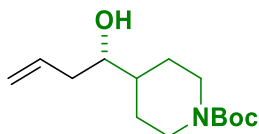

Alcohol **2b** (43.1 mg, 0.2 mmol) was subjected to standard reaction conditions (110 °C, 48 h) with **SL-J502-1** as ligand. Upon flash column chromatography (SiO<sub>2</sub>: 7:93 EtOAc:hexanes) the title compound **3b** was isolated as a brown-yellow oil in 86% yield (44.0 mg, 0.17 mmol, 91% ee).

**TLC (SiO<sub>2</sub>):** R<sub>f</sub> = 0.5 (1:1 EtOAc:Hexanes)

**<sup>1</sup>H NMR** (500 MHz, CDCl<sub>3</sub>): δ 5.83 (dddd, *J* = 16.8, 11.1, 8.3, 6.1 Hz, 1H), 5.20 – 5.13 (m, 2H), 4.15 (s, 3H), 3.42 (ddt, *J* = 9.5, 6.5, 3.2 Hz, 1H), 2.66 (s, 2H), 2.40 – 2.31 (m, 1H), 2.12 (dt, *J* = 13.9, 8.5 Hz, 1H), 1.83 (dp, *J* = 12.9, 2.6 Hz, 1H), 1.65 – 1.56 (m, 3H), 1.45 (s, 9H), 1.29 – 1.23 (m, 2H).

**<sup>13</sup>C NMR** (126 MHz, CDCl<sub>3</sub>): δ 155.0, 134.9, 118.8, 79.5, 77.4, 73.8, 41.6, 39.0, 28.6, 28.2.

**HPLC:** (Chiralcel column OJ-H 2, Hexane: 2-PrOH = 97:03, 1.0 mL/60min, 254 nm).

All spectral data were found in accordance with literature values.<sup>9</sup>

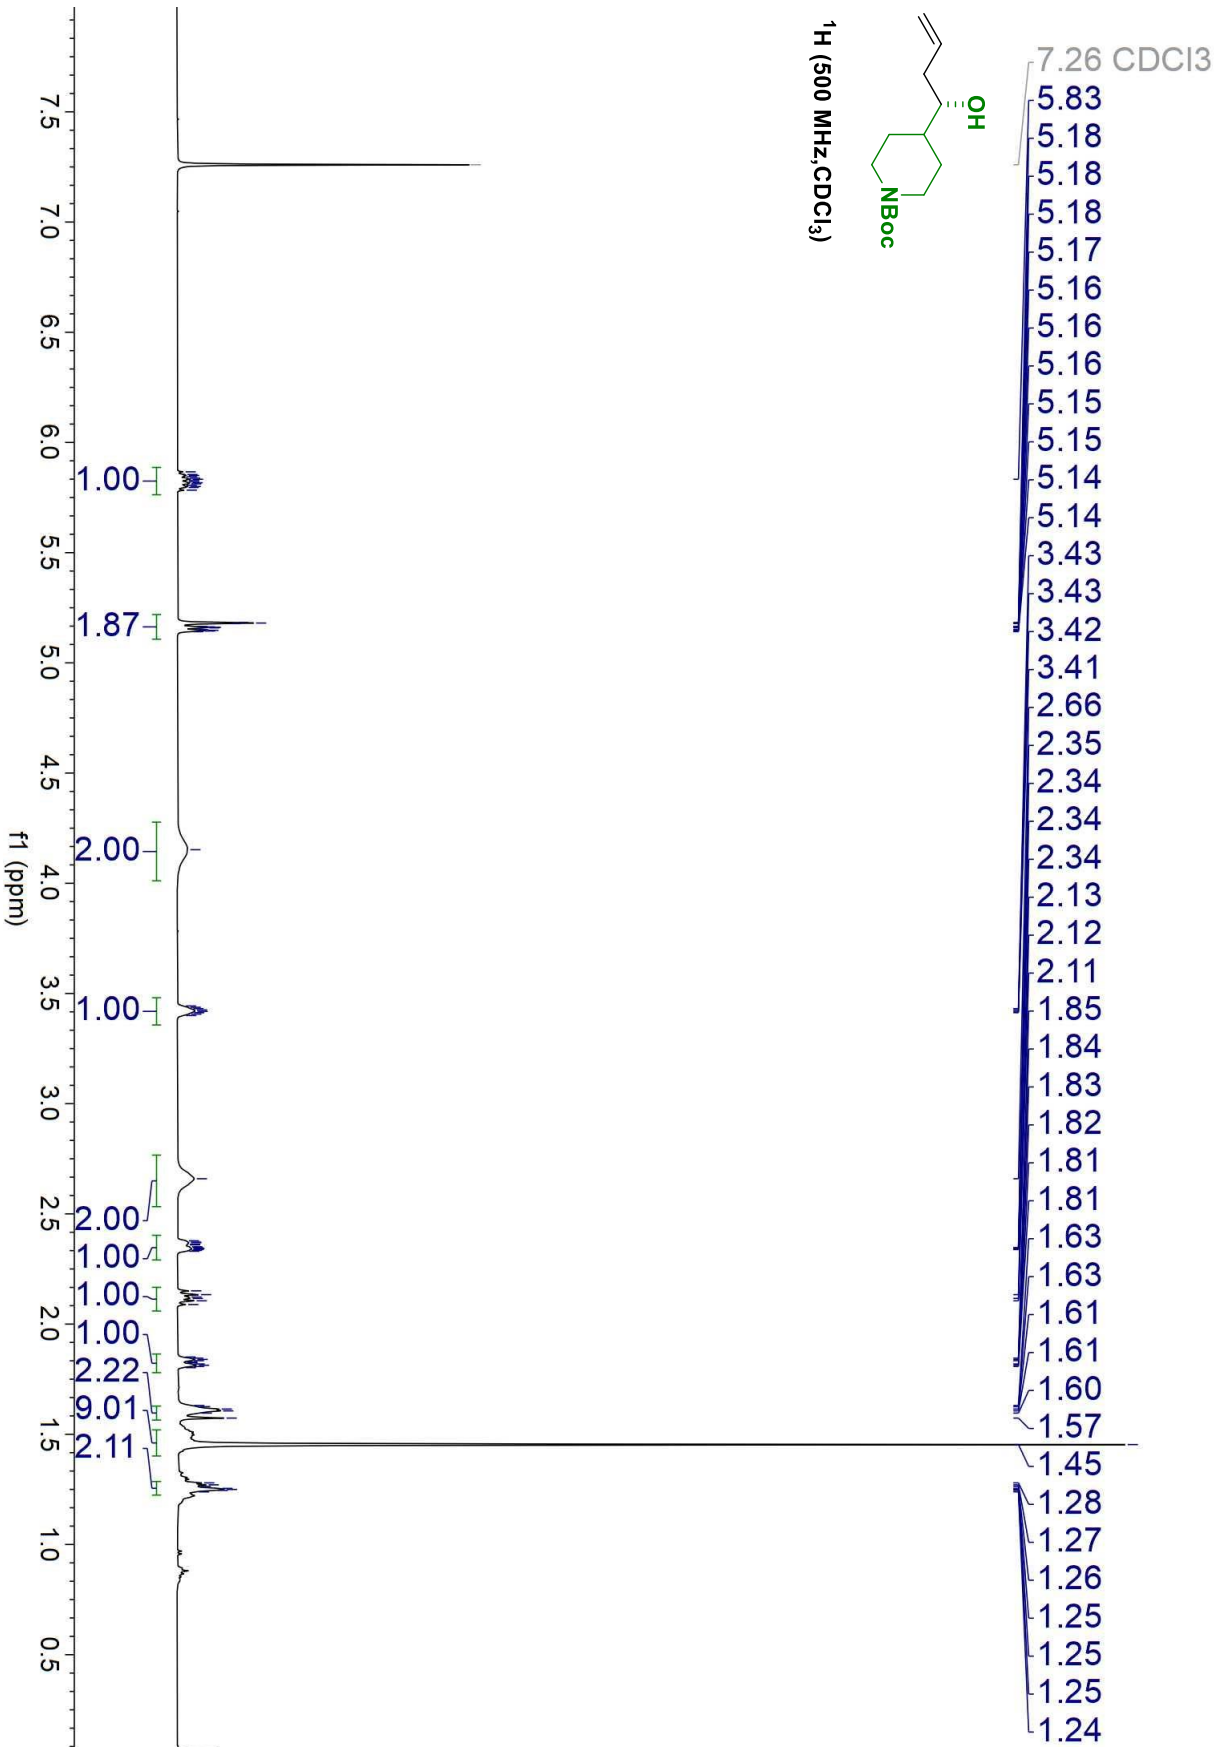

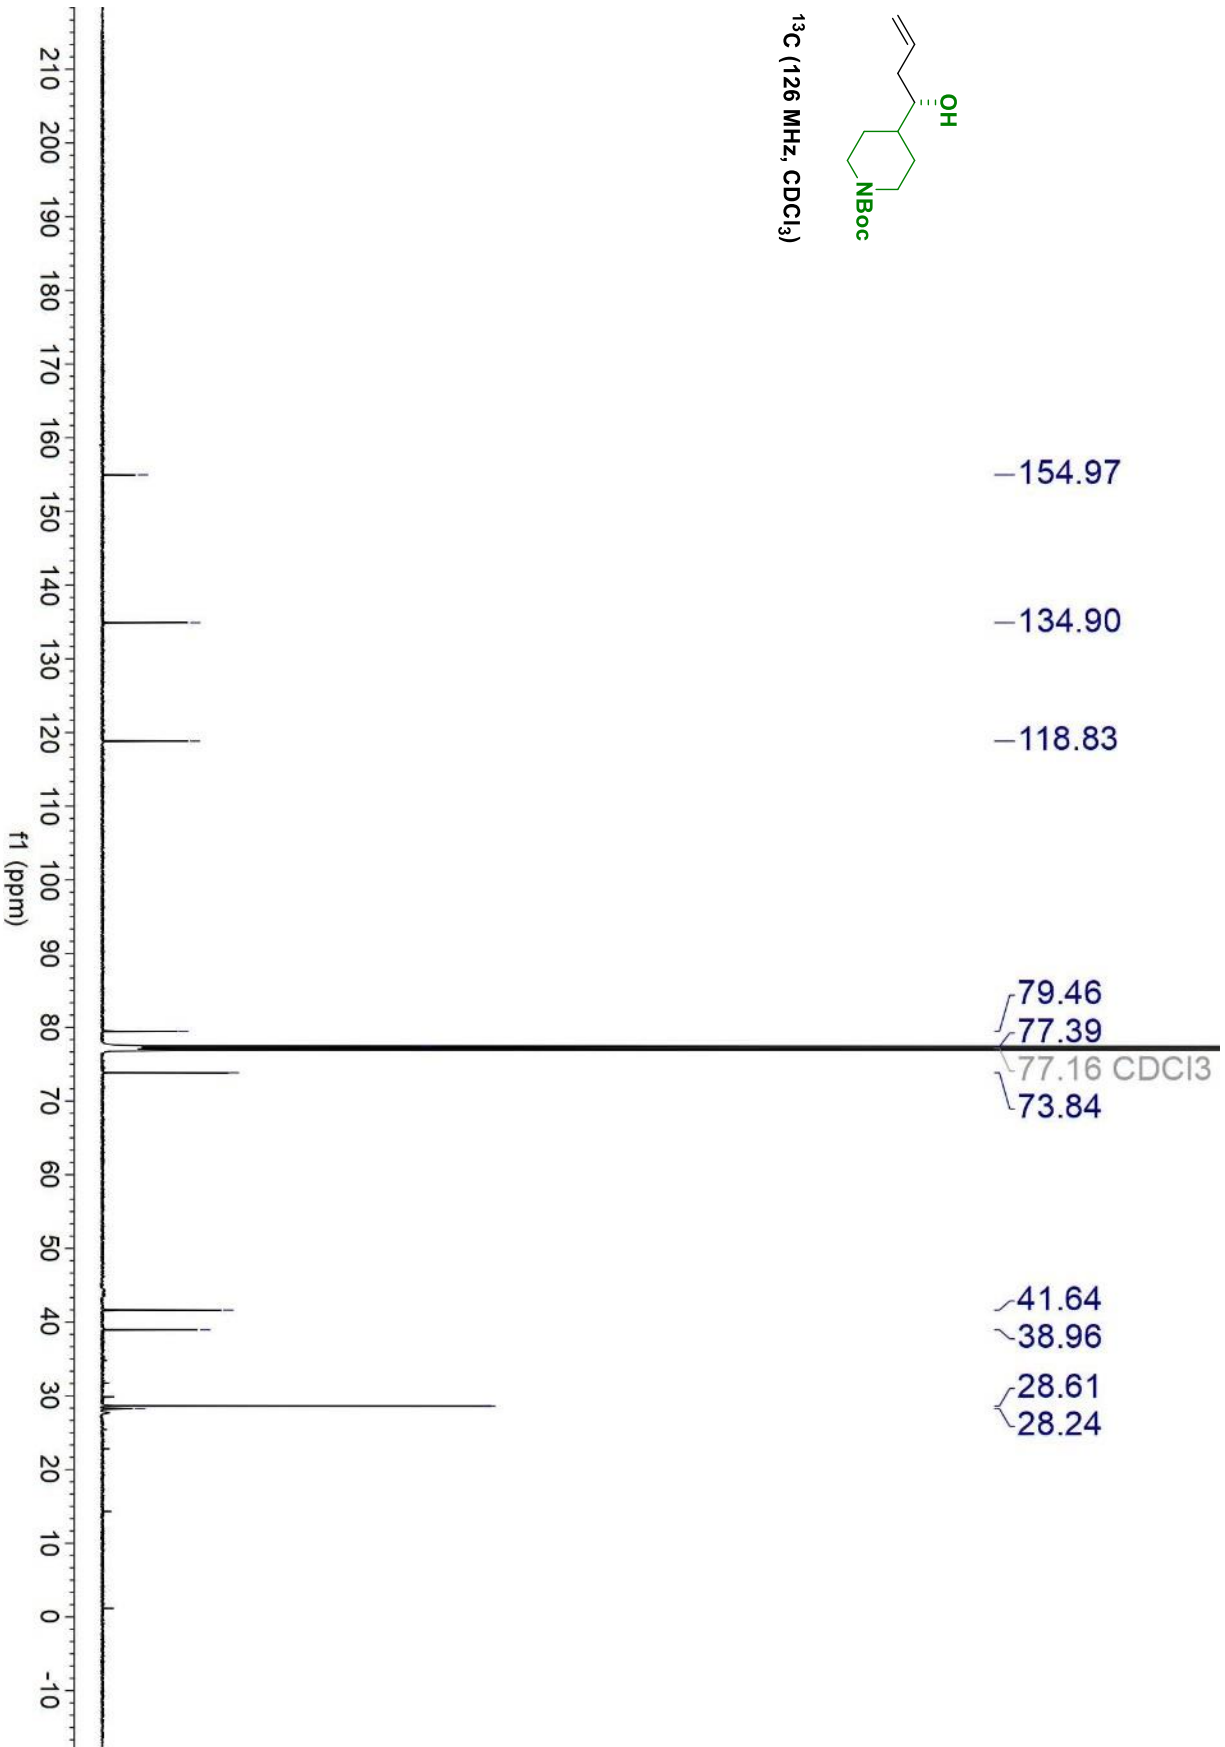

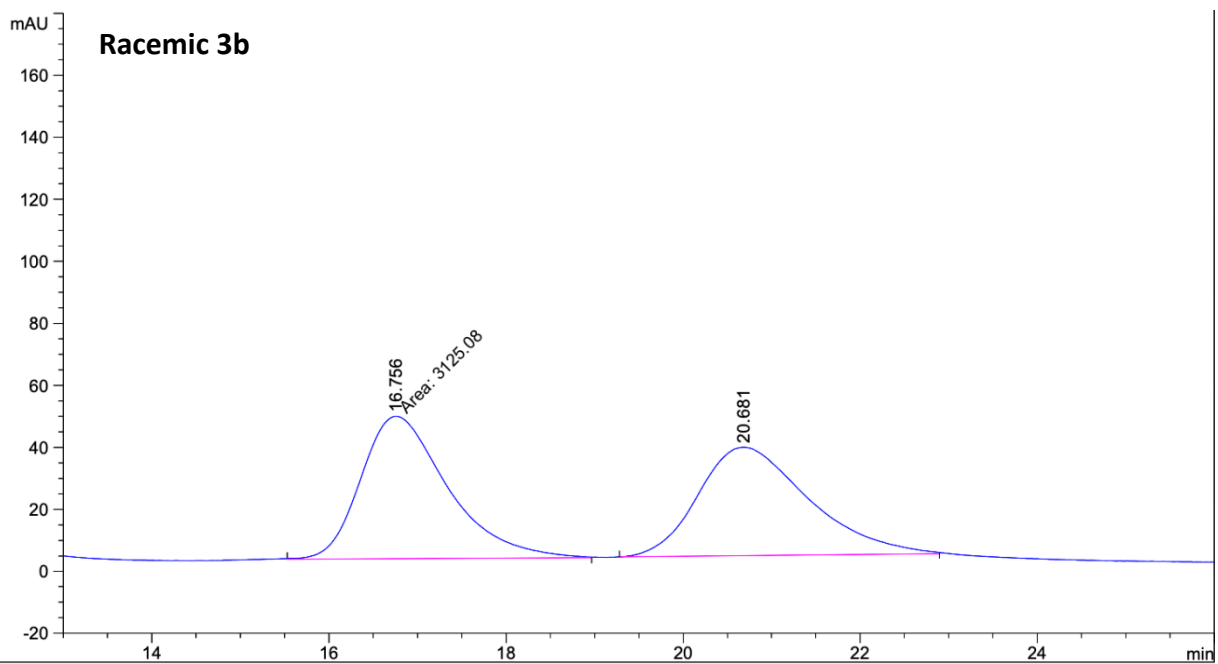

| Peak # | RetTime [min] | Type | Width [min] | Area [mAU*s] | Height [mAU] | Area %  |
|--------|---------------|------|-------------|--------------|--------------|---------|
| 1      | 16.756        | MM   | 1.1348      | 3125.08179   | 45.89839     | 50.6927 |
| 2      | 20.681        | BB   | 1.0296      | 3039.67627   | 34.98554     | 49.3073 |

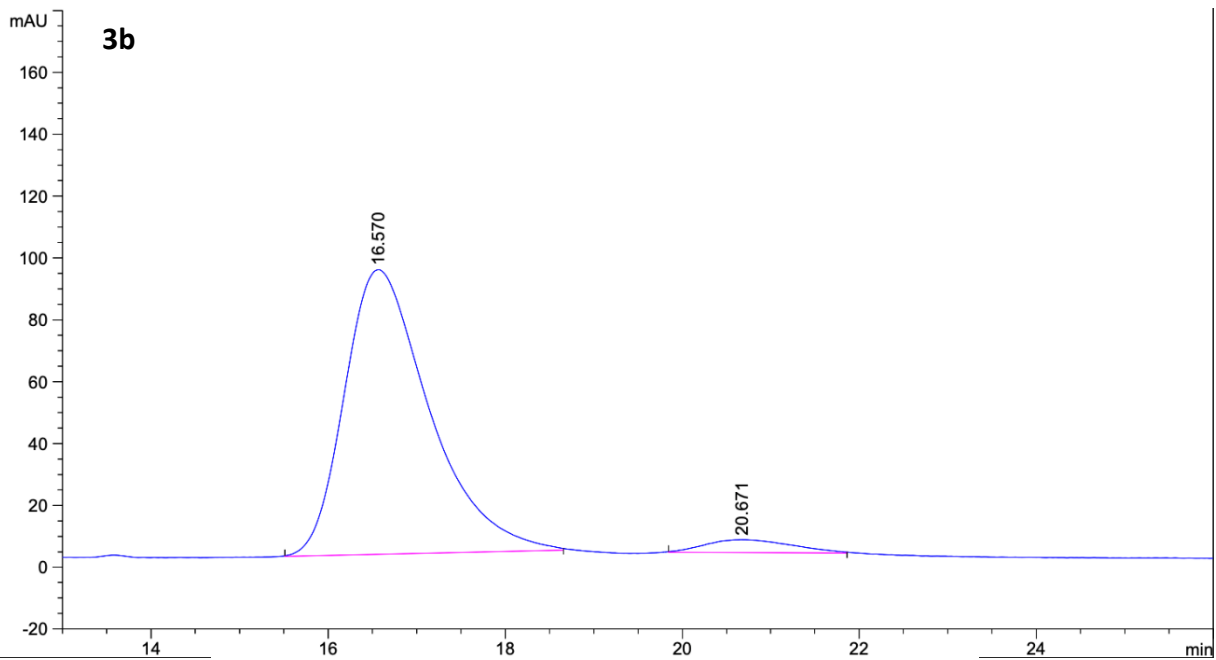

| Peak # | RetTime [min] | Type | Width [min] | Area [mAU*s] | Height [mAU] | Area %  |
|--------|---------------|------|-------------|--------------|--------------|---------|
| 1      | 16.570        | MM   | 1.5490      | 1.59622e4    | 171.75047    | 95.3428 |
| 2      | 20.671        | BB   | 1.0219      | 779.70752    | 9.06148      | 4.6572  |

**(S,E)-6,10-dimethylundeca-1,5,9-trien-4-ol (3c)**

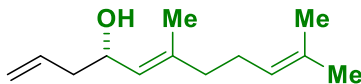

Alcohol **2c** (30.9 mg, 0.2 mmol) was subjected to standard reaction conditions (110 °C, 48 h) with **SL-J502-1** as ligand. Upon flash column chromatography (SiO<sub>2</sub>: 1:99 EtOAc:hexanes) the title compound **3c** was isolated as a brown-red oil in 65% yield (24.9 mg, 0.13 mmol, 98% ee).

Aldehyde *dehydro-2c* (30.4 mg, 0.2 mmol) was subjected to standard reaction conditions (80°C, 48 h) with HCO<sub>2</sub>H (15 μL, 0.4 mmol, 200 mol%) and **SL-J502-1** as ligand. Upon flash column chromatography (SiO<sub>2</sub>: 2:98 EtOAc:hexanes), the title compound **3c** was isolated as a yellow oil in 75% Yield (29.0 mg, 0.15 mmol, 95% ee).

**TLC (SiO<sub>2</sub>):** R<sub>f</sub> = 0.5 (1:4 EtOAc:Hexanes)

**<sup>1</sup>H NMR** (500 MHz, CDCl<sub>3</sub>): δ 5.80 (ddt, *J* = 17.3, 10.1, 7.2 Hz, 1H), 5.22 – 5.04 (m, 4H), 4.42 (q, *J* = 7.1 Hz, 1H), 2.28 (td, *J* = 6.8, 3.7 Hz, 2H), 2.09 (t, *J* = 7.2 Hz, 2H), 2.04 – 1.99 (m, 2H), 1.68 (s, 6H), 1.60 (s, 3H), 1.51 (s, 1H).

**<sup>13</sup>C NMR** (126 MHz, CDCl<sub>3</sub>): δ 138.9, 134.7, 131.8, 127.1, 124.0, 118.0, 67.9, 42.3, 39.6, 26.5, 25.8, 17.8, 16.8.

**HRMS** (Na<sup>+</sup>, *m/z*): for C<sub>13</sub>H<sub>22</sub>O calcd. = 217.1563; found = 217.1562.

**FTIR (neat):** 3354, 2918, 1641, 995, 912 cm<sup>-1</sup>.

**HPLC:** (Diacel Chemistry CHIRALPAK ASH-2, Hexane: 2-PrOH = 995:005, 0.5 mL/30min, 254 nm).

**[α]<sub>D</sub><sup>24</sup>** = 10.2 (c = 0.4, CHCl<sub>3</sub>)

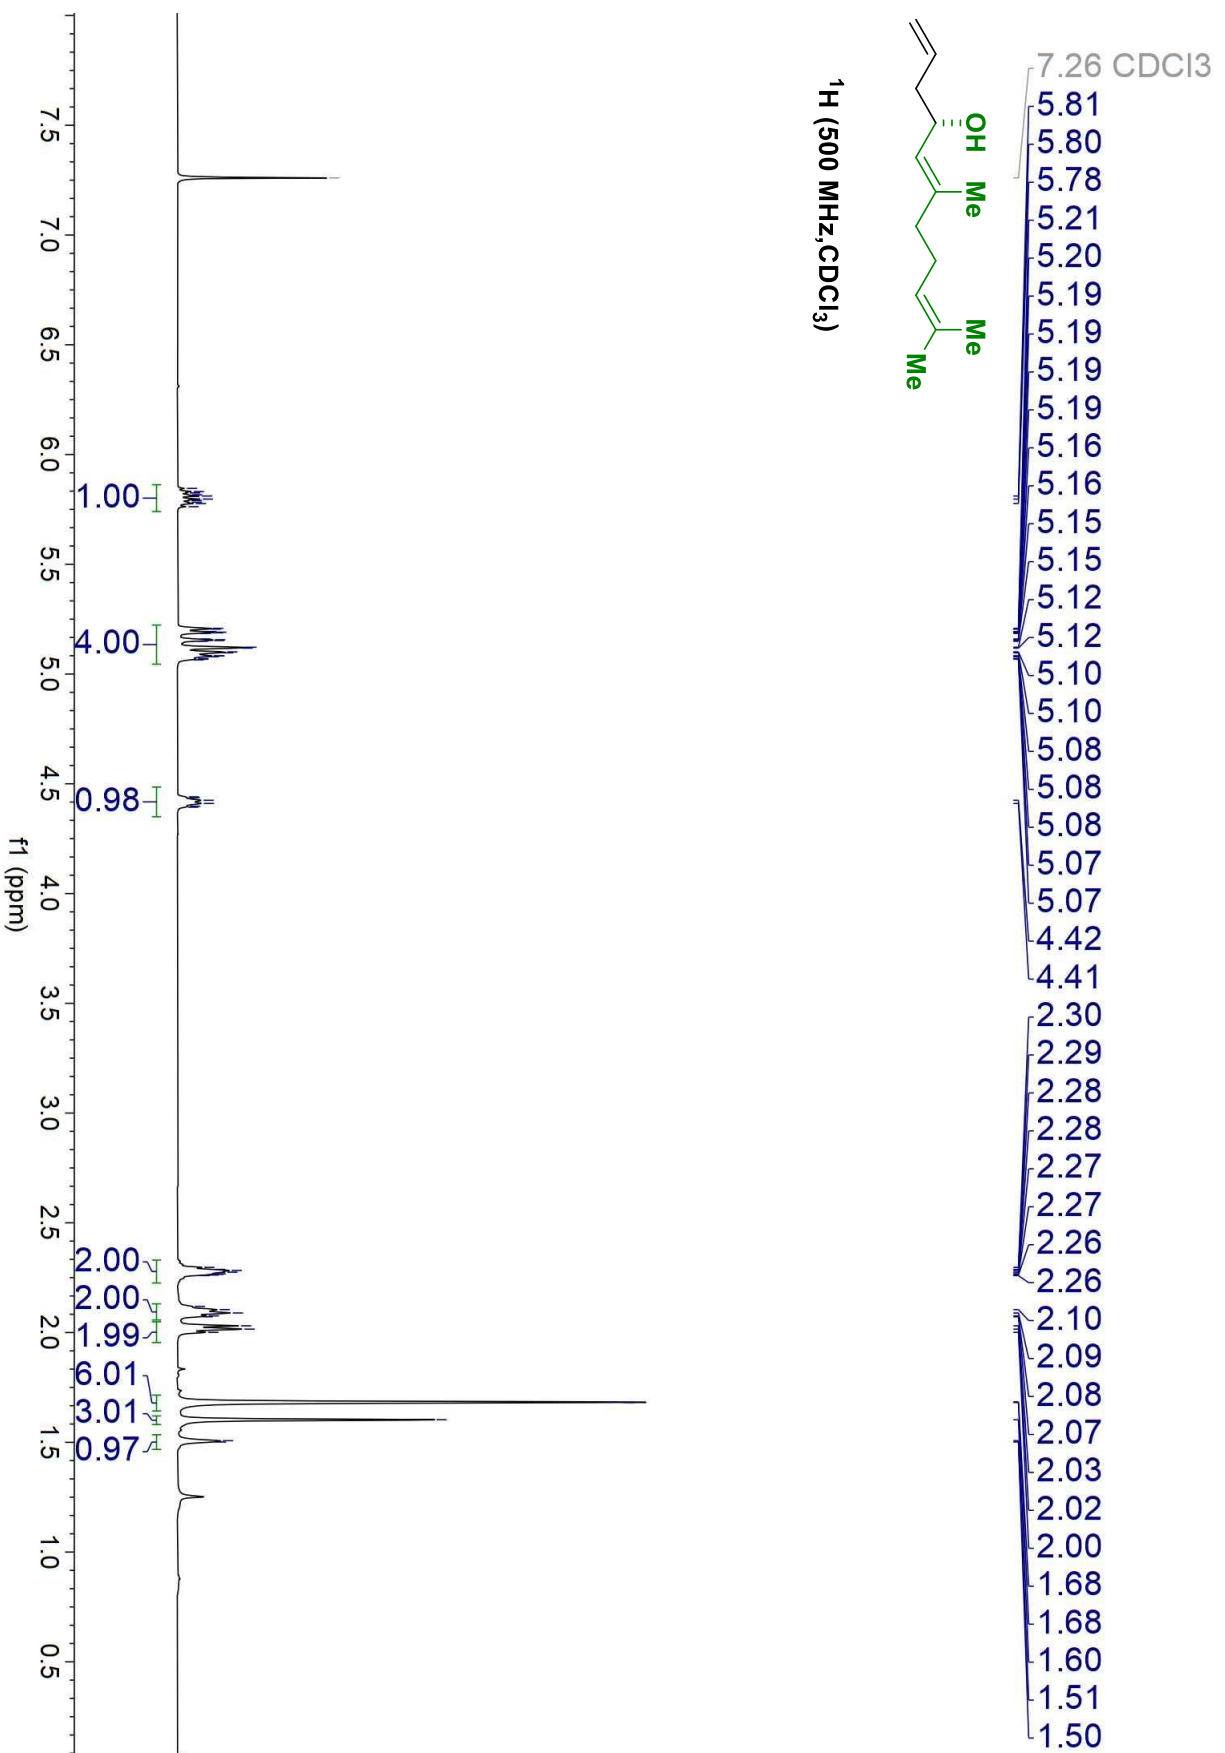

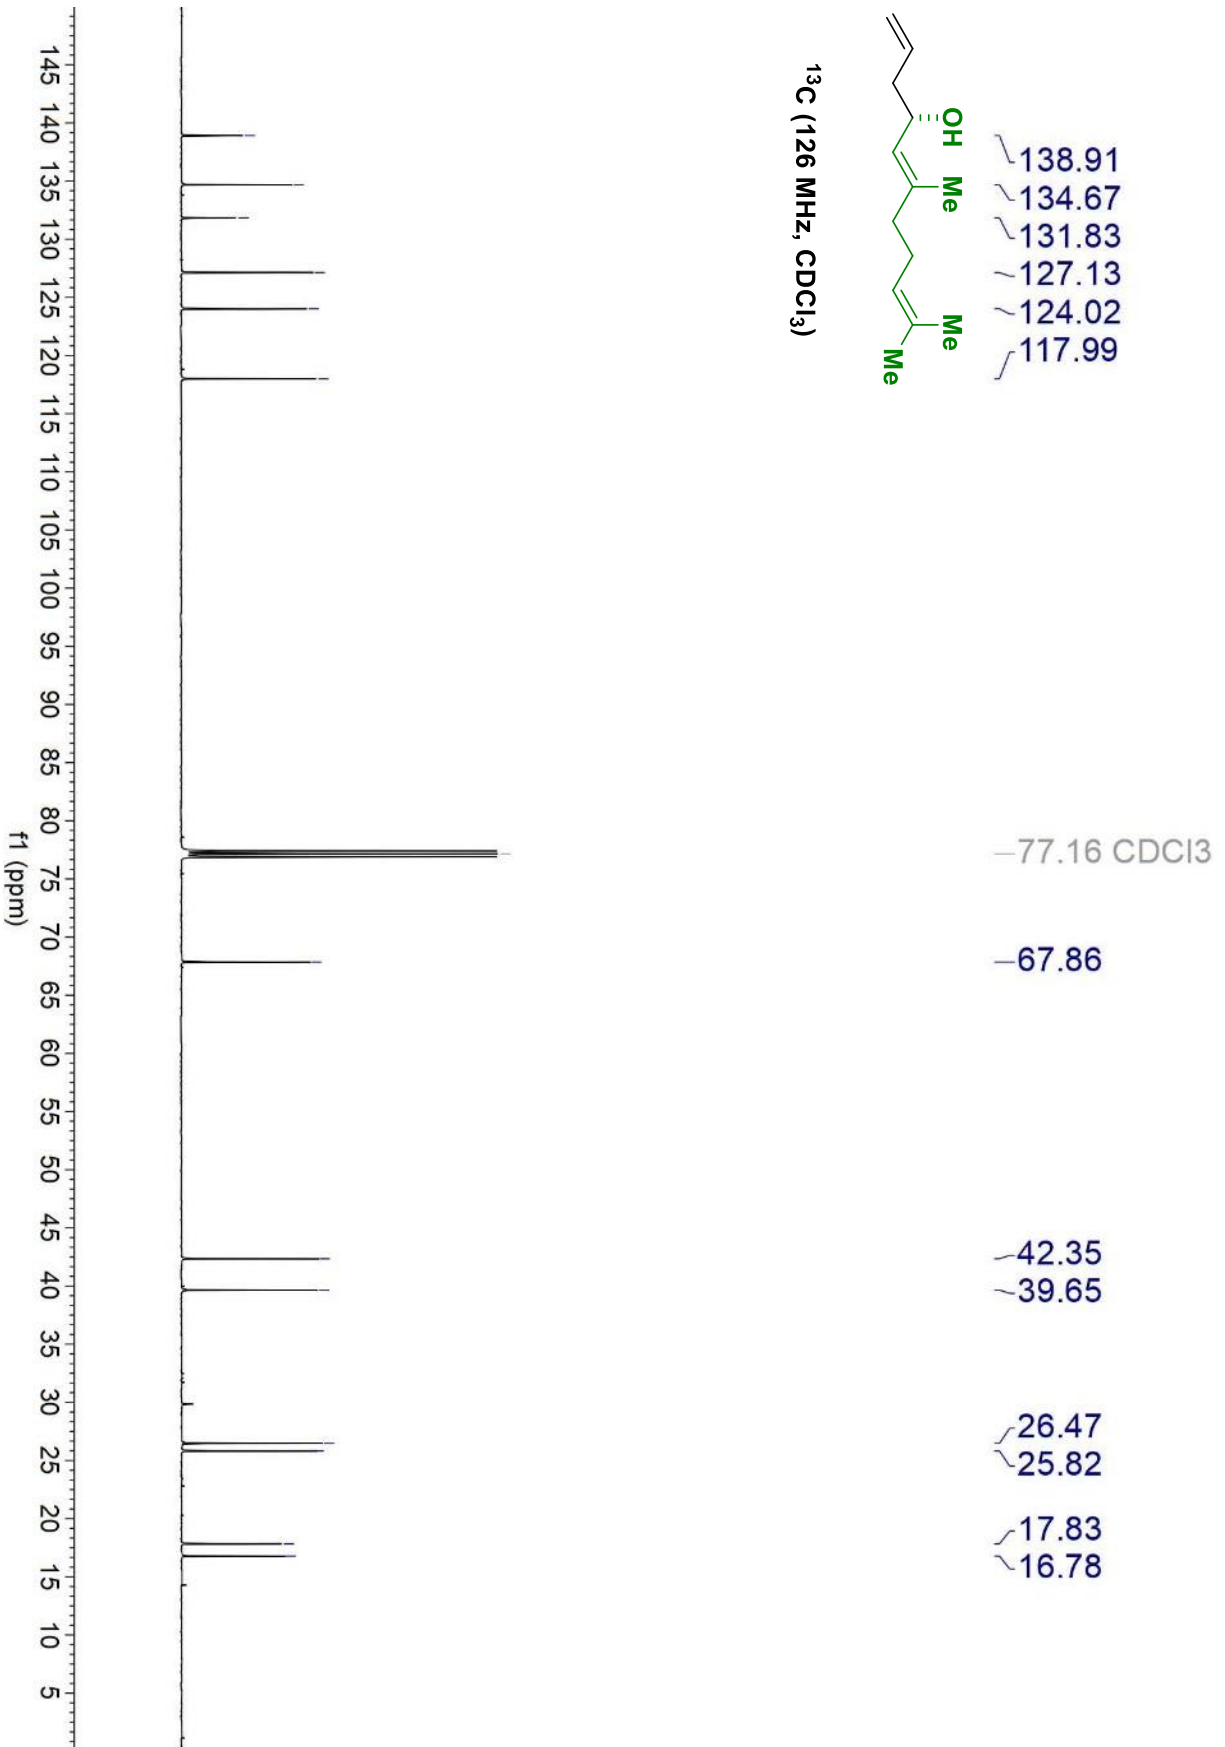



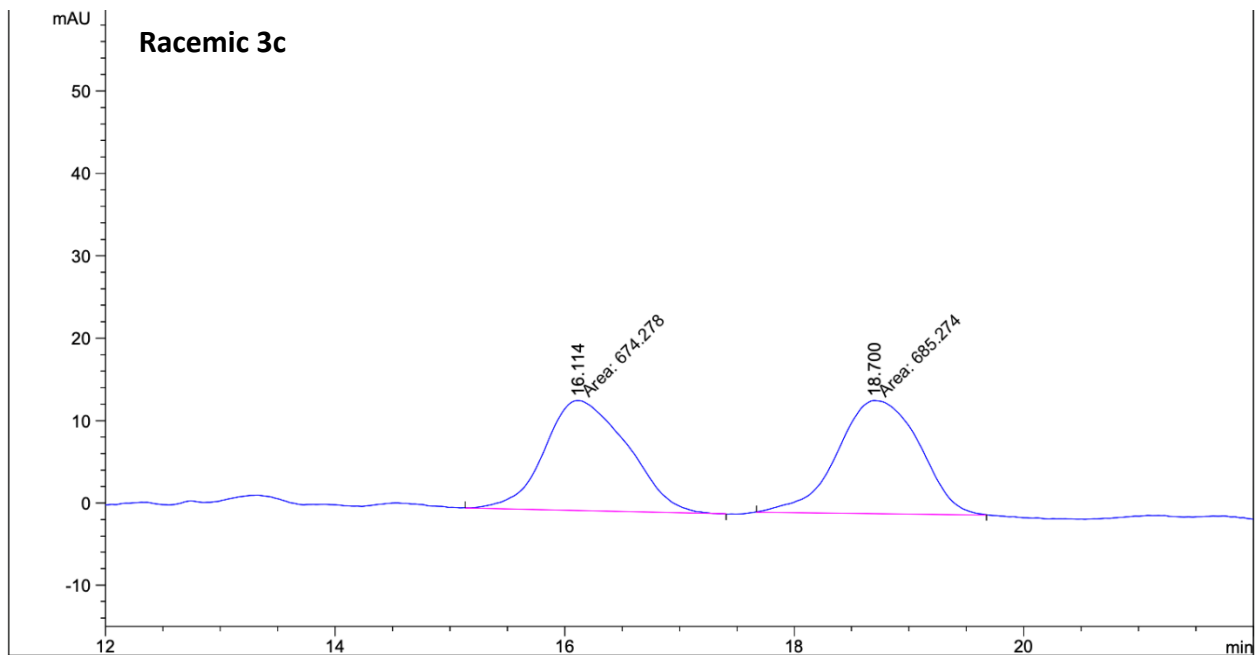

| Peak # | RetTime [min] | Type | Width [min] | Area [mAU*s] | Height [mAU] | Area %  |
|--------|---------------|------|-------------|--------------|--------------|---------|
| 1      | 16.114        | MM   | 0.8408      | 674.27777    | 13.36558     | 49.5956 |
| 2      | 18.700        | MM   | 0.8311      | 685.27362    | 13.74189     | 50.4044 |

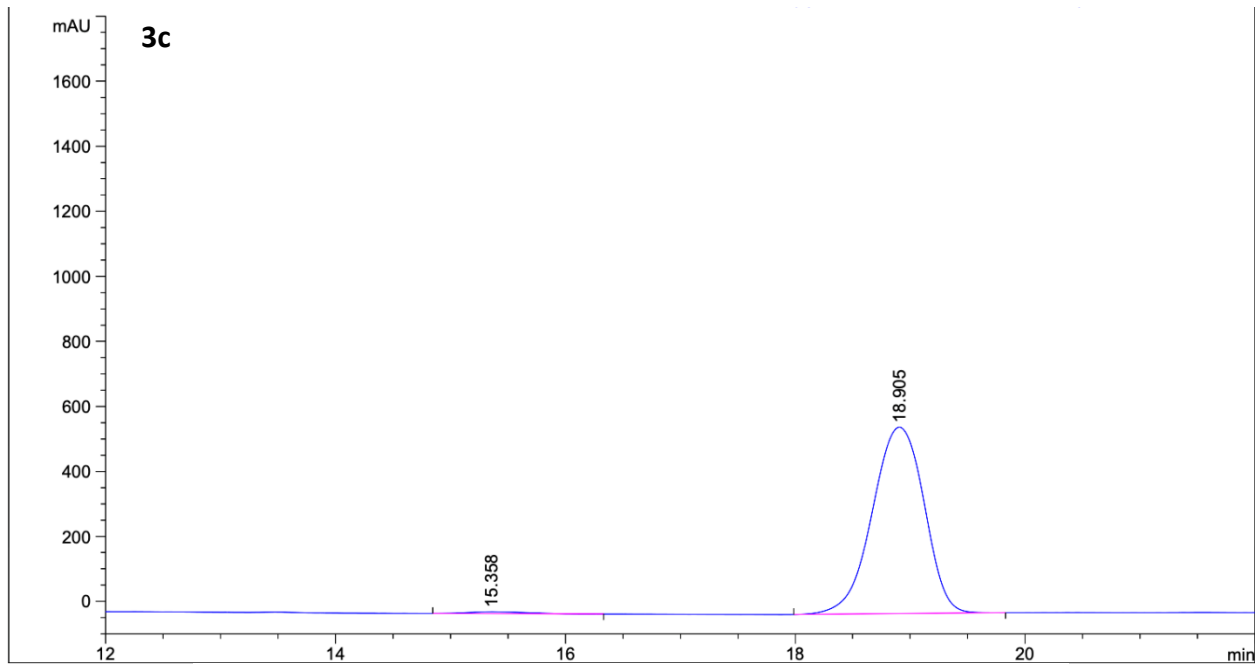

| Peak # | RetTime [min] | Type | Width [min] | Area [mAU*s] | Height [mAU] | Area %  |
|--------|---------------|------|-------------|--------------|--------------|---------|
| 1      | 15.358        | BB   | 0.4495      | 218.13478    | 5.87026      | 1.1968  |
| 2      | 18.905        | BB   | 0.5038      | 1.80082e4    | 574.31494    | 98.8032 |

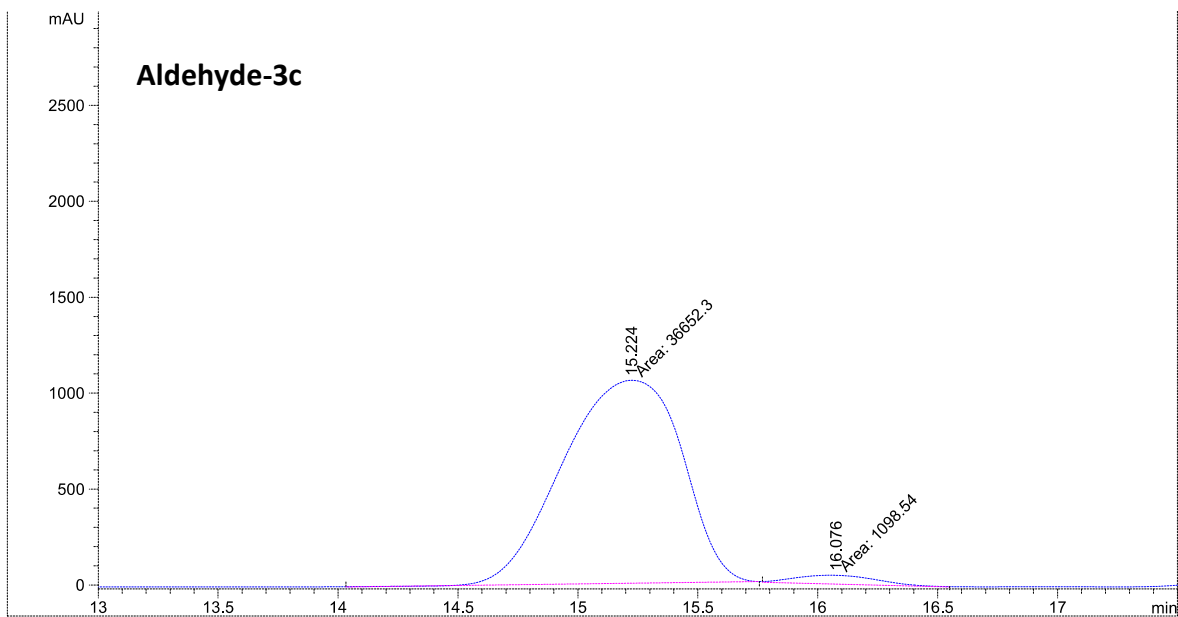

| Peak # | RetTime [min] | Type | Width [min] | Area [mAU*s] | Height [mAU] | Area %  |
|--------|---------------|------|-------------|--------------|--------------|---------|
| 1      | 15.224        | MM   | 0.5772      | 3.66523e4    | 1058.38611   | 97.0900 |
| 2      | 16.076        | MM   | 0.3959      | 1098.53699   | 46.24778     | 2.9100  |

**(R)-1-(5-methylfuran-2-yl)hex-5-en-3-ol (3d)**

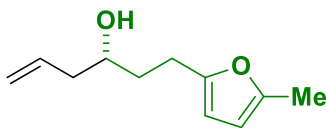

Alcohol **2d** (28.0 mg, 0.2 mmol) was subjected to standard reaction conditions (110 °C, 48 h) with **SL-J502-1** as ligand. Upon flash column chromatography (SiO<sub>2</sub>: 4:96 EtOAc:hexanes) the title compound **3d** was isolated as a yellow oil in 83% yield (30.0 mg, 0.17 mmol, 88% ee).

**TLC (SiO<sub>2</sub>):** R<sub>f</sub> = 0.2 (0.5:4.5 EtOAc:hexanes)

**<sup>1</sup>H NMR** (400 MHz, CDCl<sub>3</sub>): δ 5.89 – 5.83 (m, 2H), 5.83 – 5.76 (m, 1H), 5.19 – 5.13 (m, 1H), 5.14 – 5.11 (m, 1H), 3.69 (tq, *J* = 8.2, 4.3 Hz, 1H), 2.76 (ddd, *J* = 15.0, 8.8, 5.9 Hz, 1H), 2.67 (dt, *J* = 15.4, 7.8 Hz, 1H), 2.38 – 2.26 (m, 1H), 2.25 (s, 3H), 2.25 – 2.12 (m, 1H), 1.88 – 1.79 (m, 1H), 1.79 – 1.69 (m, 1H), 1.64 (d, *J* = 4.1 Hz, 1H).

**<sup>13</sup>C NMR** (101 MHz, CDCl<sub>3</sub>): δ 154.0, 150.5, 134.8, 118.4, 106.0, 105.7, 70.1, 42.1, 35.4, 24.5, 13.6.

**HRMS** (CI, *m/z*): for C<sub>11</sub>H<sub>16</sub>O<sub>2</sub>: calcd. = 180.1150; found = 180.1142.

**FTIR** (neat): 3382, 3080, 2978, 2923, 2856, 1569, 1444, 1224, 1062, 915 cm<sup>-1</sup>.

**HPLC:** (Chiralcel column Amylose 2, Hexane: 2-PrOH = 98:02, 0.5 mL/min, 210 nm).

**[α]<sub>D</sub><sup>24</sup>** = -6.2 (c = 0.1, CHCl<sub>3</sub>).

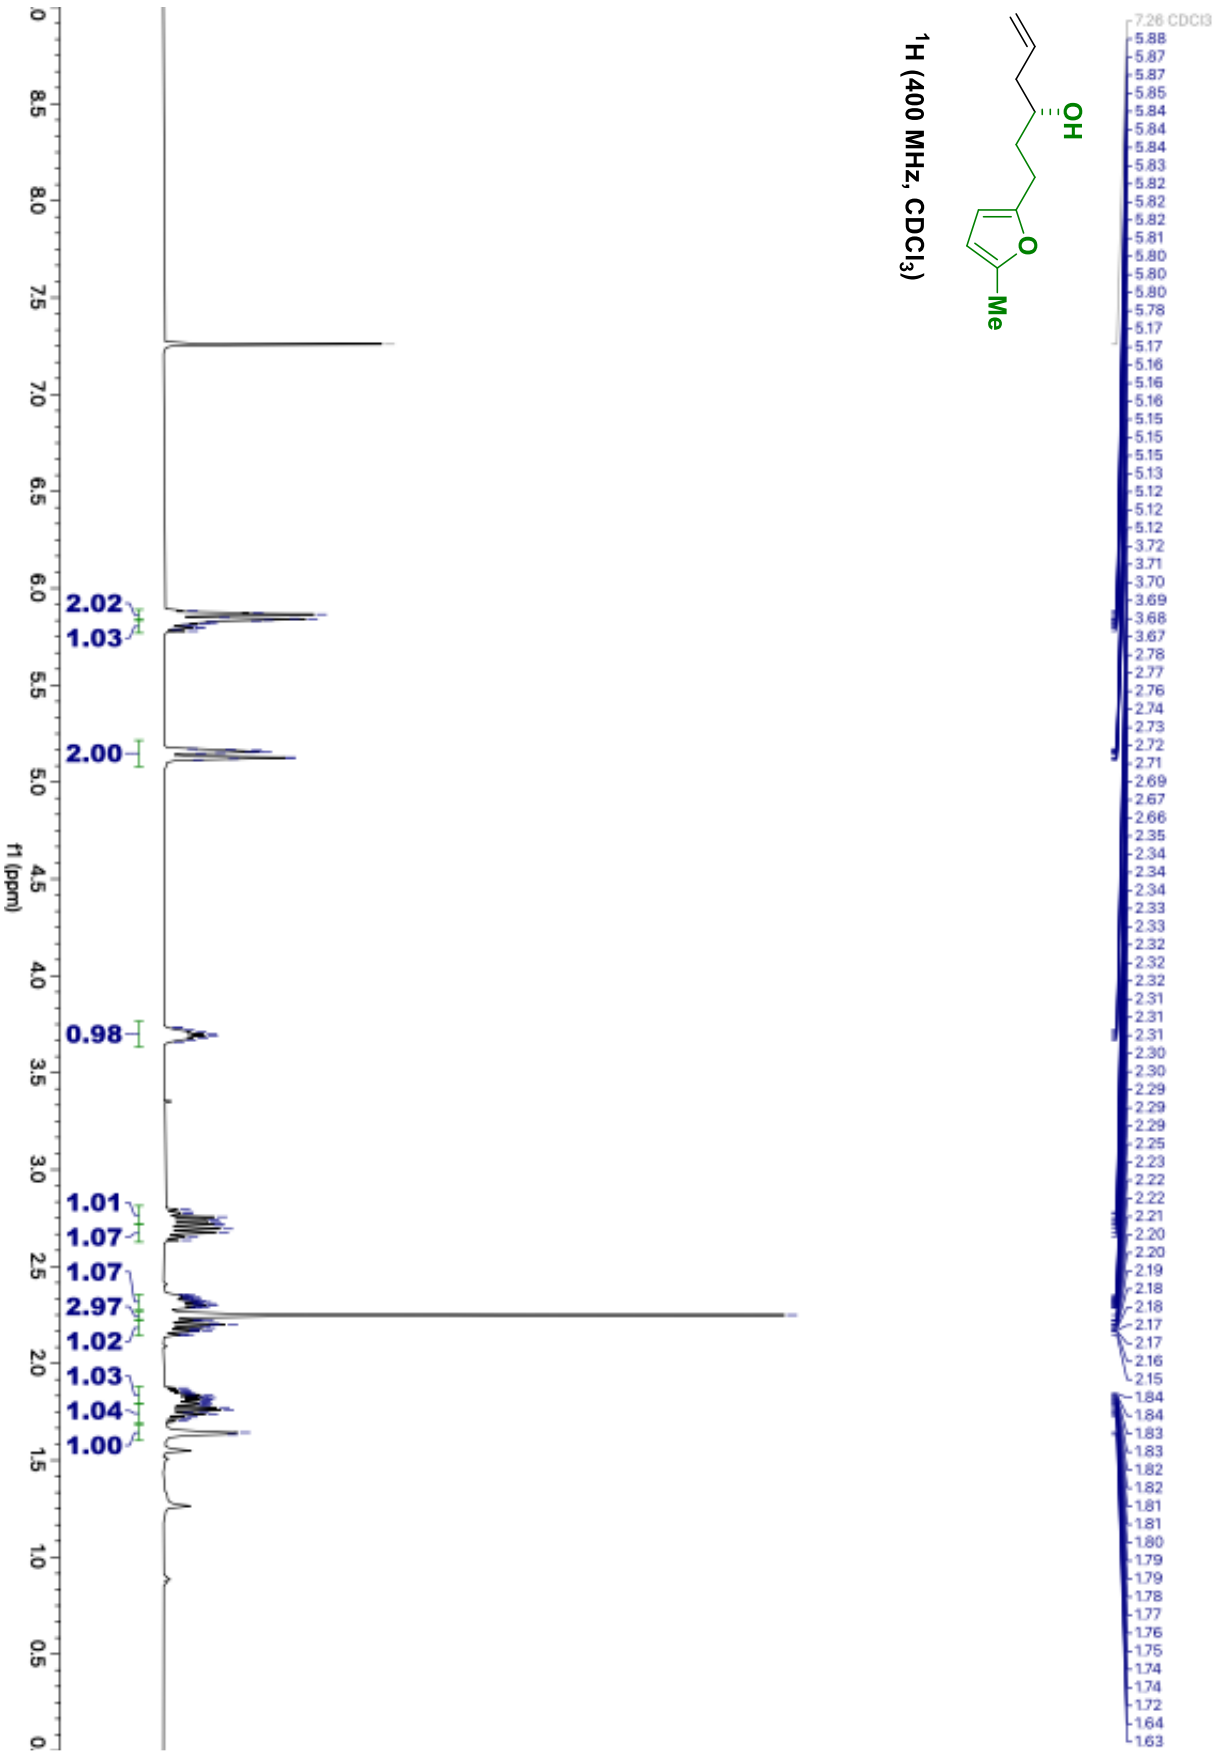

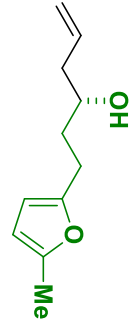

$^{13}\text{C}$  (101 MHz,  $\text{CDCl}_3$ )

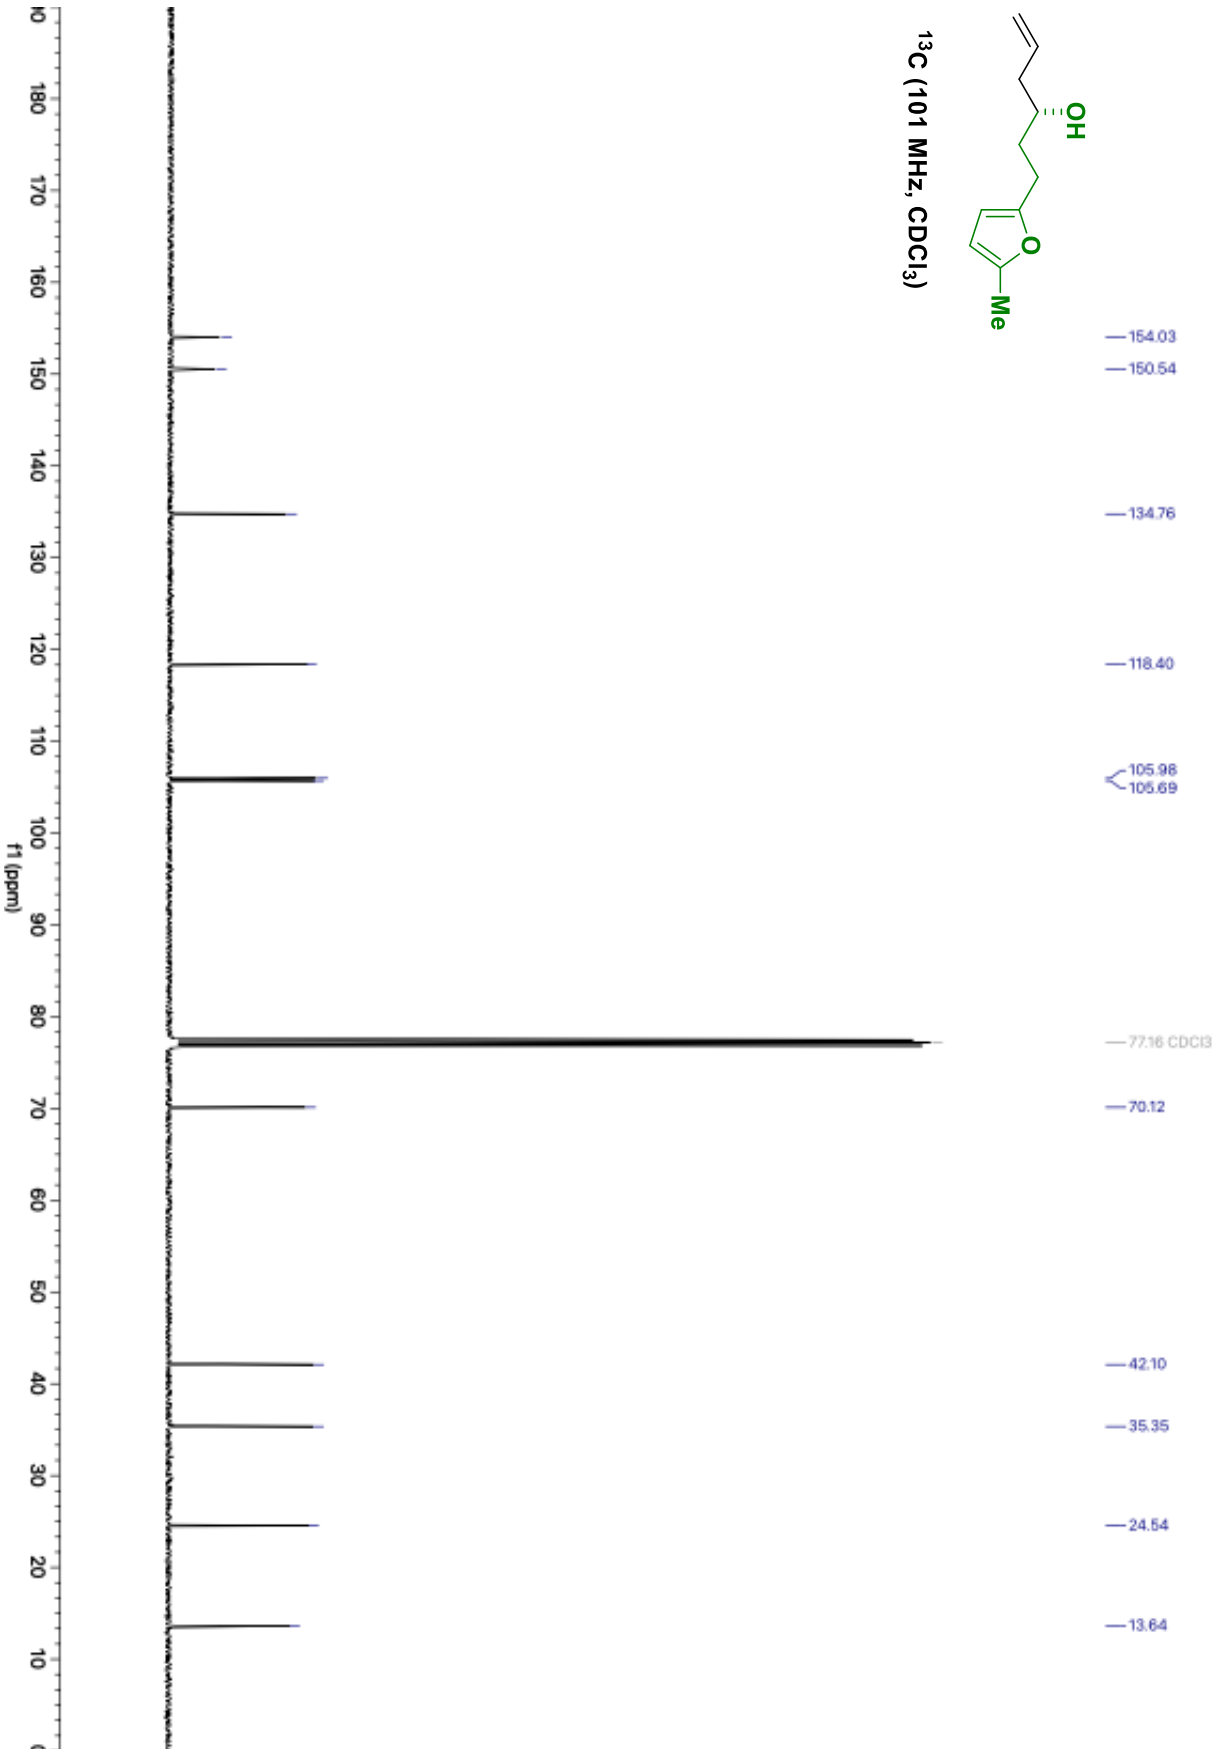

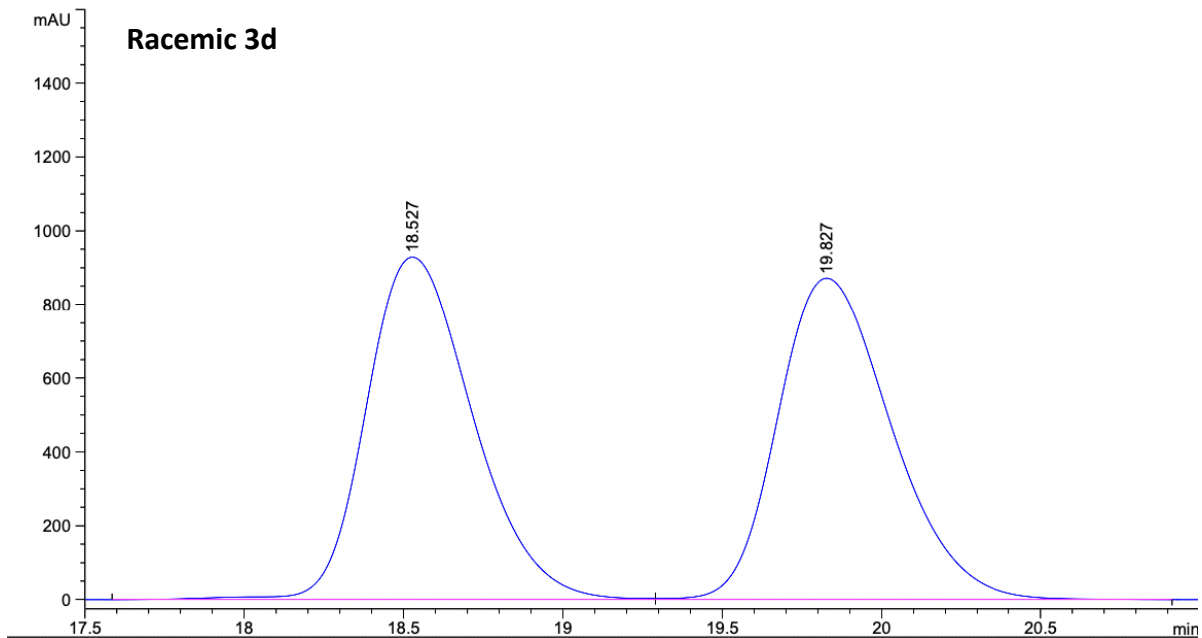

| Peak # | RetTime [min] | Type | Width [min] | Area [mAU*s] | Height [mAU] | Area %  |
|--------|---------------|------|-------------|--------------|--------------|---------|
| 1      | 18.527        | VV   | 0.3610      | 2.15877e4    | 929.26007    | 49.9848 |
| 2      | 19.827        | VB   | 0.3850      | 2.16008e4    | 872.05762    | 50.0152 |

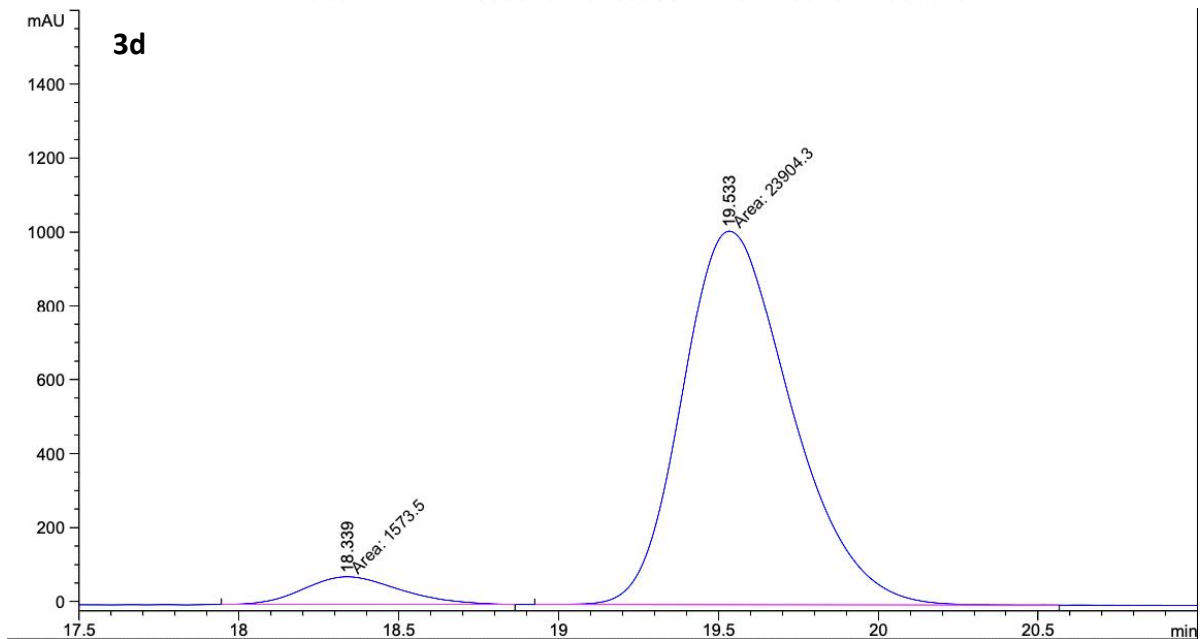

| Peak # | RetTime [min] | Type | Width [min] | Area [mAU*s] | Height [mAU] | Area %  |
|--------|---------------|------|-------------|--------------|--------------|---------|
| 1      | 18.339        | MM   | 0.3497      | 1573.49731   | 74.99251     | 6.1759  |
| 2      | 19.533        | MM   | 0.3938      | 2.39043e4    | 1011.69702   | 93.8241 |

**(R)-1-(4,5-diphenylfuran-2-yl)hex-5-en-3-ol (3e)**

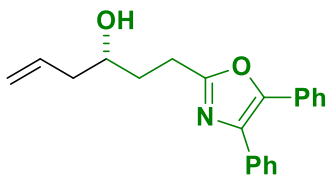

Alcohol **2e** (55.9 mg, 0.2 mmol) was subjected to standard reaction conditions (110 °C, 48 h) with **SL-J502-1** as ligand. Upon flash column chromatography (SiO<sub>2</sub>: 13:87 EtOAc:hexanes) the title compound **3e** was isolated as a yellow oil in 78% yield (49.6 mg, 0.16 mmol, 90% ee).

**TLC** (SiO<sub>2</sub>): R<sub>f</sub> = 0.4 (2:3 EtOAc:hexanes)

**<sup>1</sup>H NMR** (500 MHz, CDCl<sub>3</sub>): δ 7.63 (dd, *J* = 6.8, 1.7 Hz, 2H), 7.58 (dd, *J* = 6.8, 1.7 Hz, 2H), 7.39 – 7.30 (m, 6H), 5.87 (ddt, *J* = 17.3, 10.2, 7.2 Hz, 1H), 5.19 – 5.13 (m, 2H), 3.83 (tt, *J* = 7.7, 4.1 Hz, 1H), 3.03 (t, *J* = 7.2 Hz, 3H), 2.36 (dt, *J* = 12.2, 6.2 Hz, 1H), 2.28 (dt, *J* = 14.3, 7.5 Hz, 1H), 2.09 (dtd, *J* = 14.5, 7.3, 3.3 Hz, 1H), 2.03 – 1.92 (m, 1H).

**<sup>13</sup>C NMR** (126 MHz, CDCl<sub>3</sub>): δ 163.8, 145.4, 135.0, 134.8, 132.4, 129.1, 128.8, 128.7, 128.6, 128.2, 128.0, 126.6, 118.3, 70.4, 42.2, 33.5, 25.2.

**HRMS** (Na<sup>+</sup>, *m/z*): for C<sub>21</sub>H<sub>21</sub>NO<sub>2</sub>: calcd. = 320.1645; found = 320.1641.

**FTIR** (neat): 3346, 2957, 2925, 2873, 1460, 1378, 1160, 952, 913, 743 cm<sup>-1</sup>.

**HPLC**: (Chiralcel columns Cellulose 2 + Cellulose 5, Hexane: 2-PrOH = 98:02, 0.5 mL/min, 230 nm).

[α]<sub>D</sub><sup>24</sup> = +9.4 (c = 0.1, CHCl<sub>3</sub>).

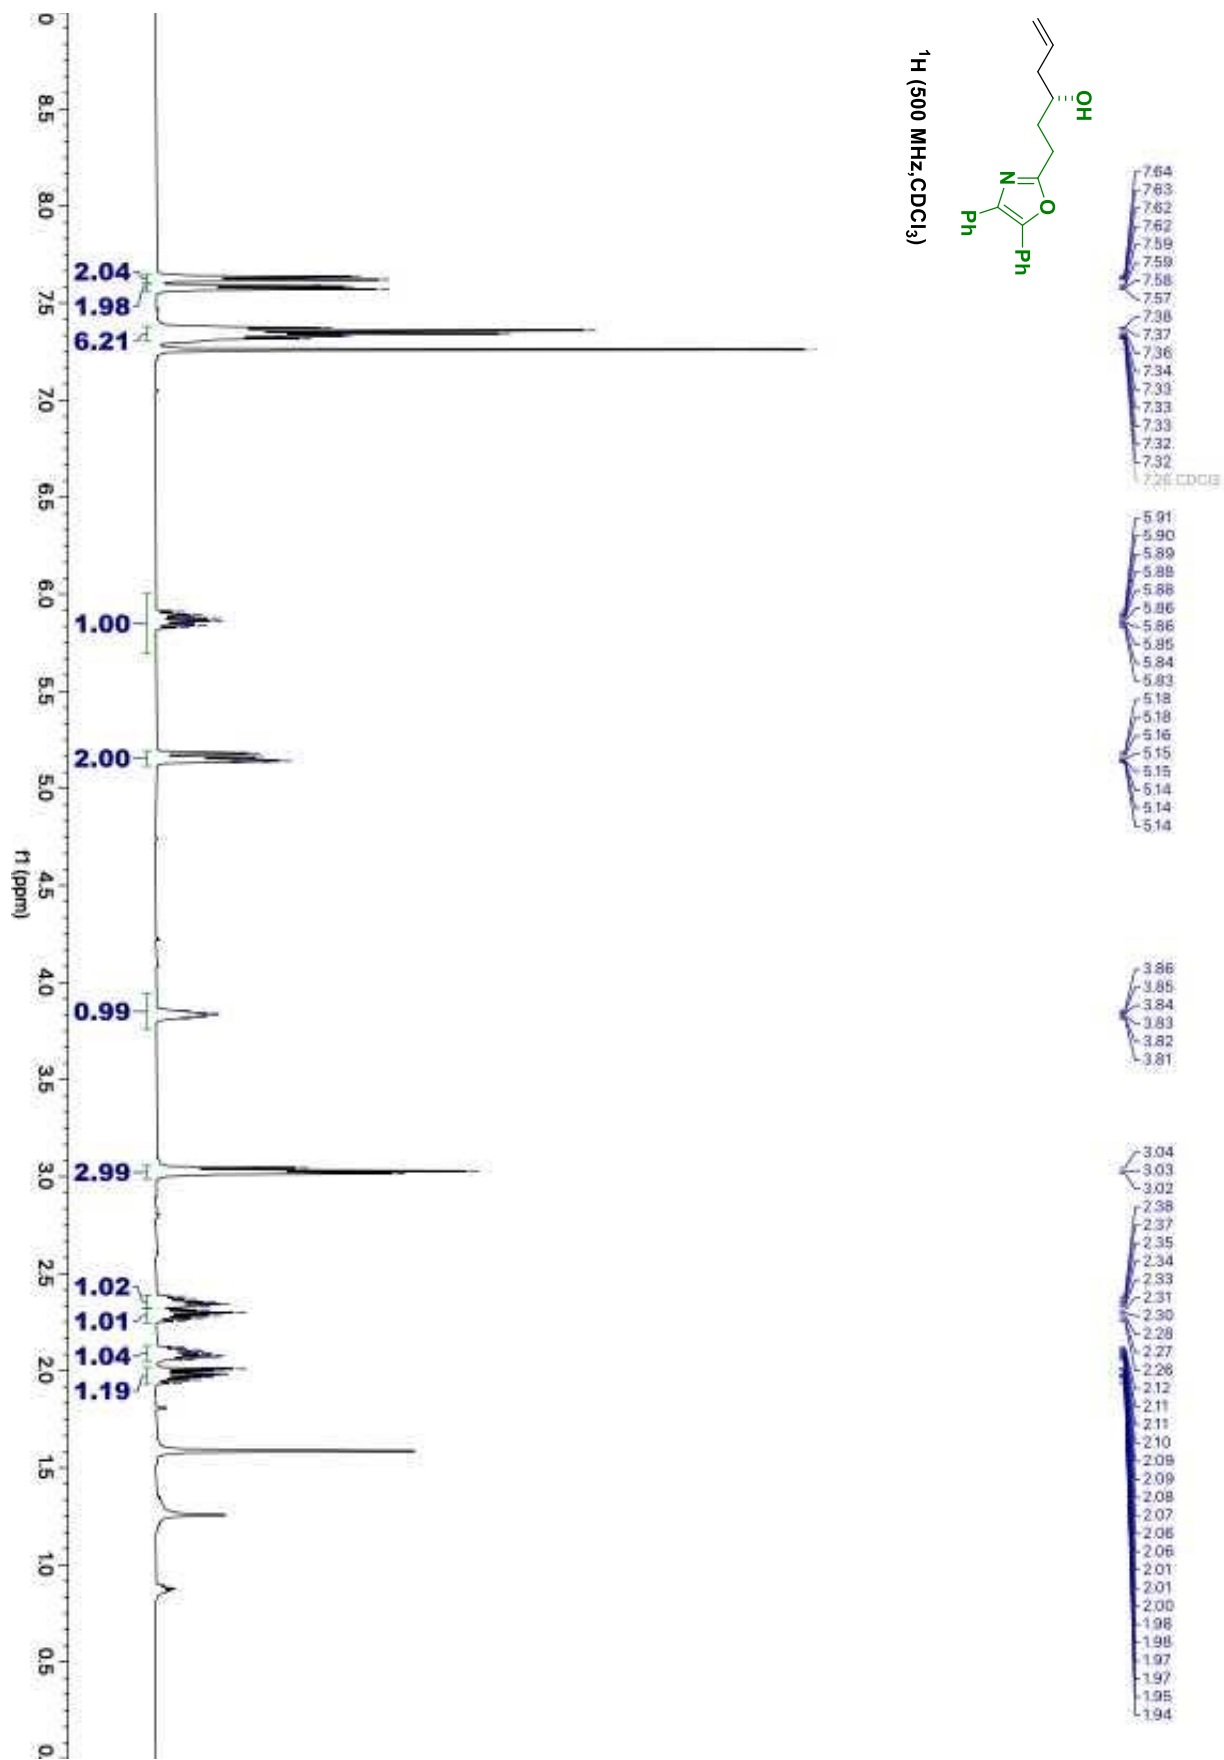



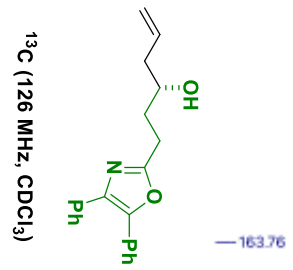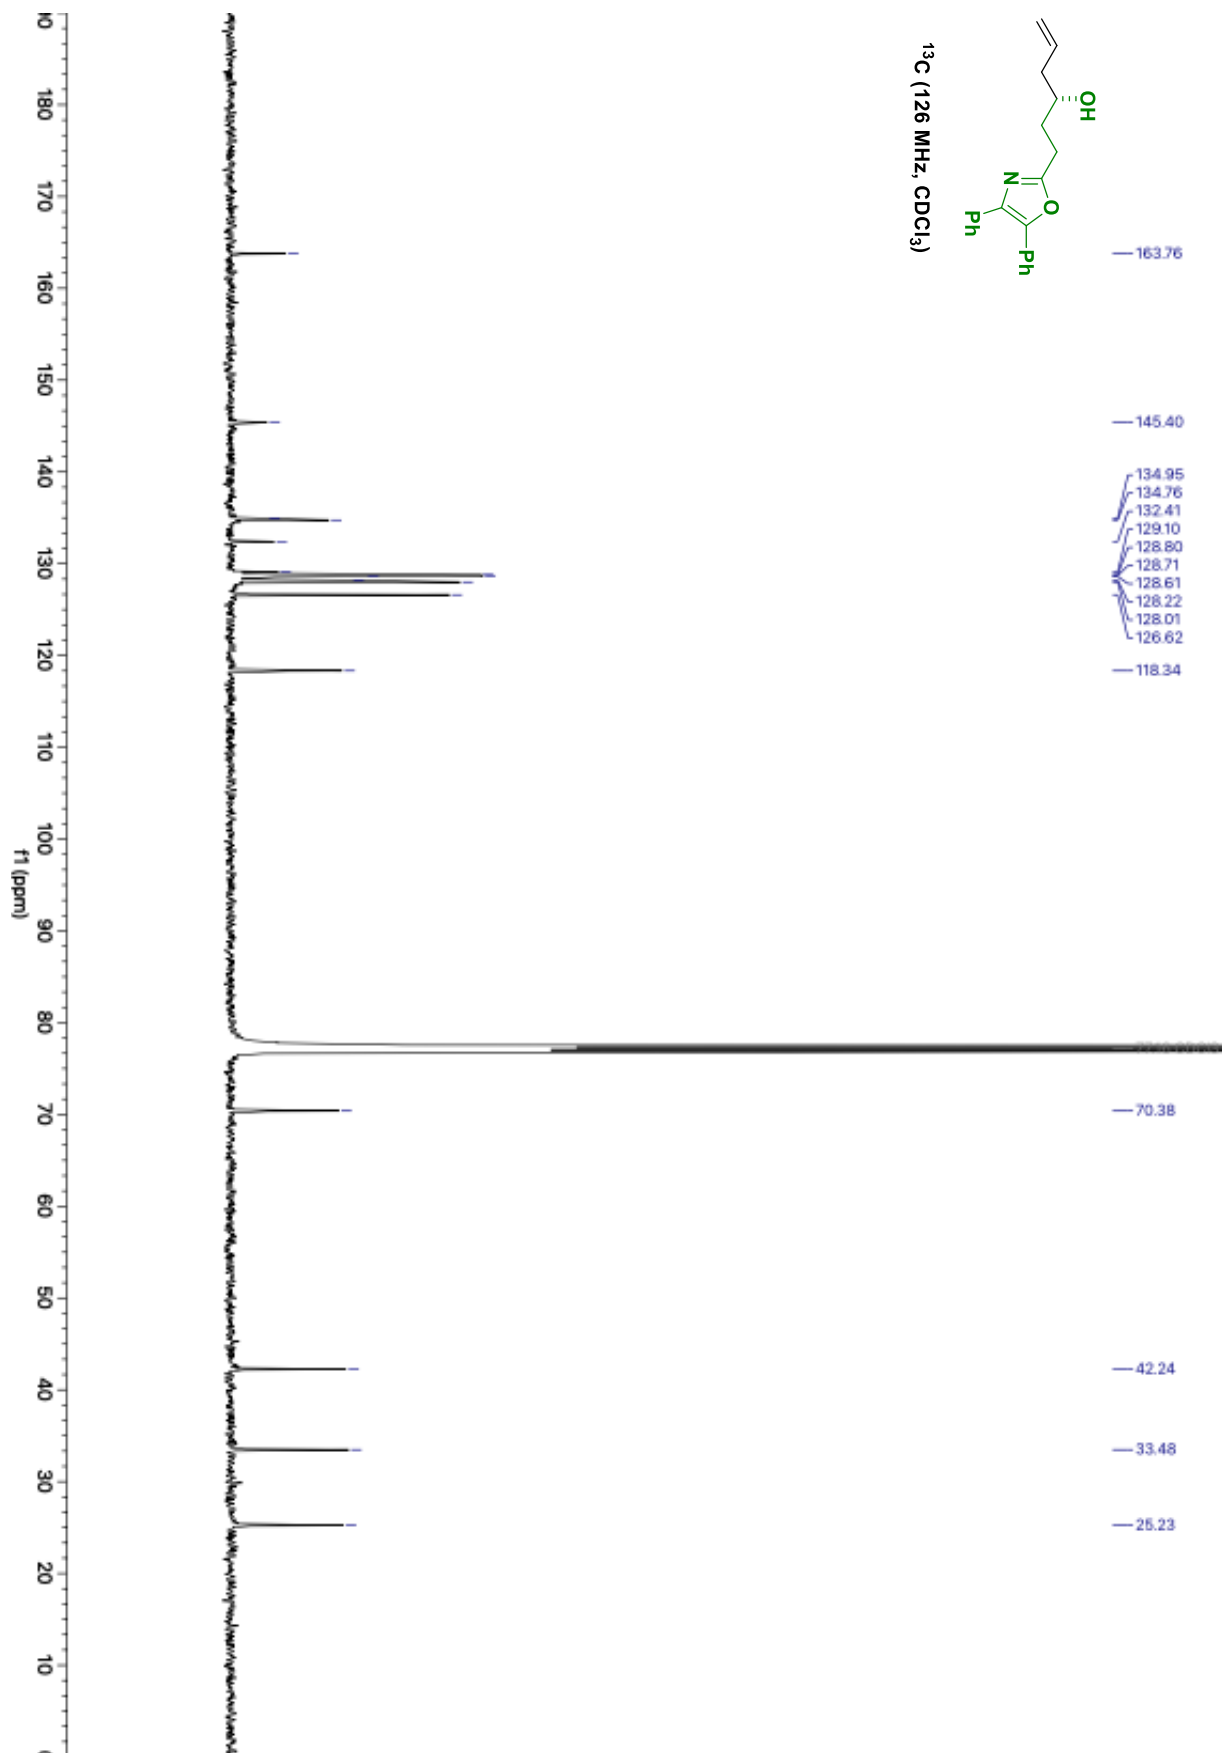

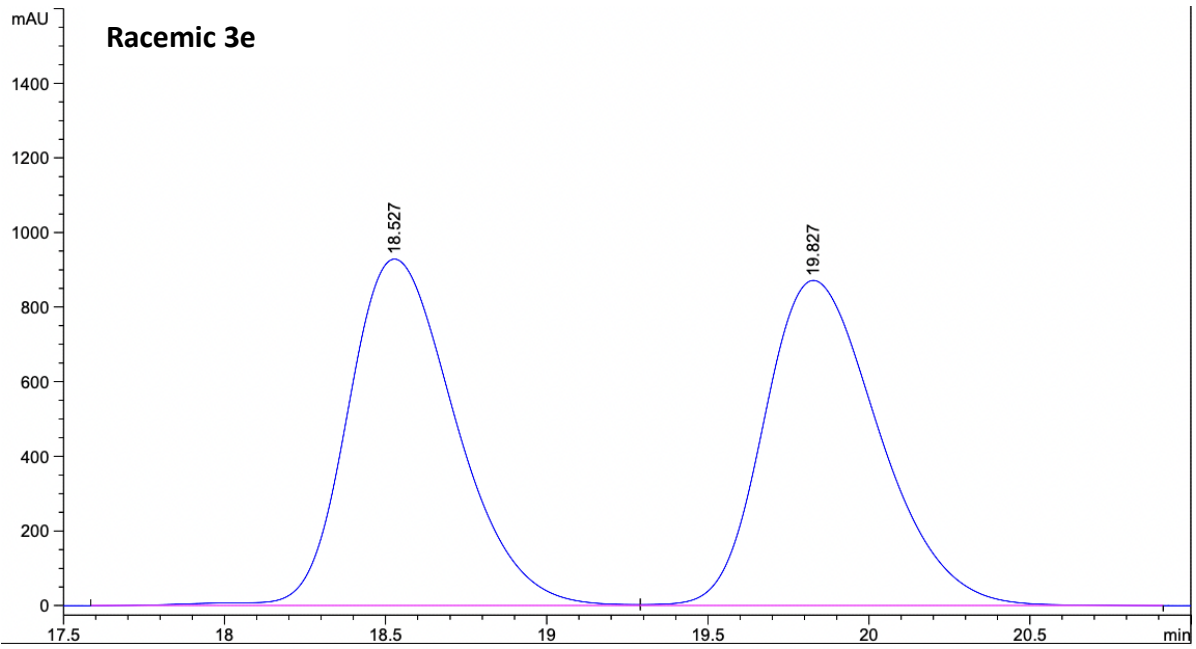

| Peak # | RetTime [min] | Type | Width [min] | Area [mAU*s] | Height [mAU] | Area %  |
|--------|---------------|------|-------------|--------------|--------------|---------|
| 1      | 69.065        | MM   | 1.7357      | 1.46579e4    | 140.75215    | 49.9993 |
| 2      | 75.079        | MM   | 1.8282      | 1.46583e4    | 133.62791    | 50.0007 |

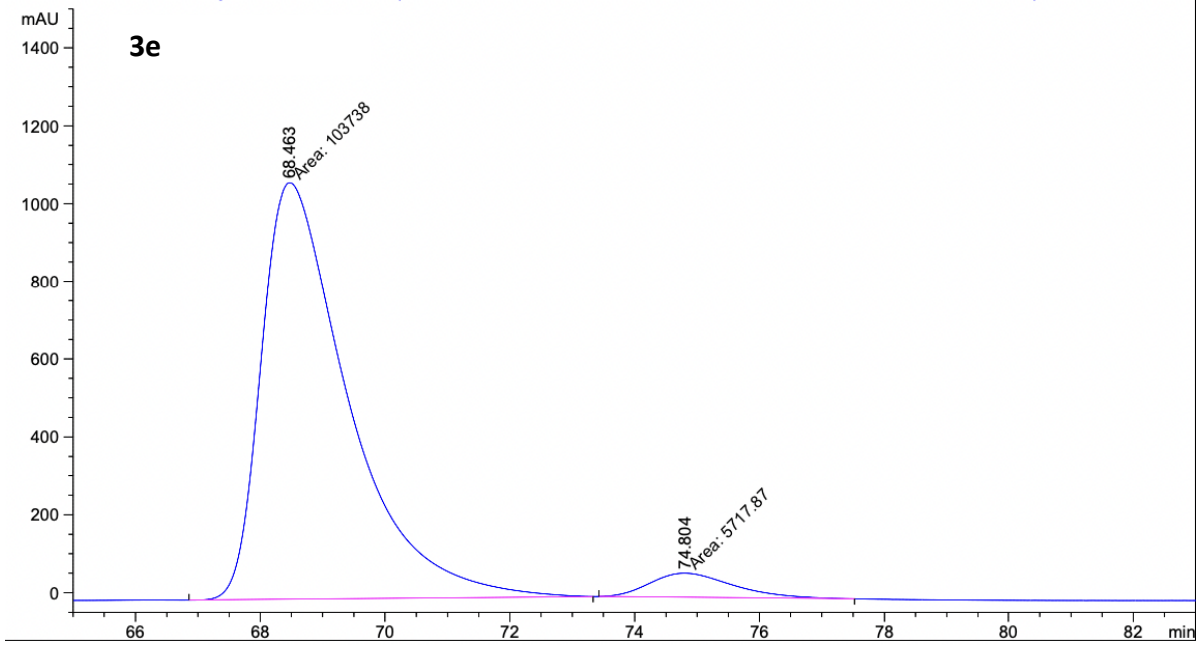

| Peak # | RetTime [min] | Type | Width [min] | Area [mAU*s] | Height [mAU] | Area %  |
|--------|---------------|------|-------------|--------------|--------------|---------|
| 1      | 68.463        | MM   | 1.6152      | 1.03738e5    | 1070.44922   | 94.7761 |
| 2      | 74.804        | MM   | 1.5413      | 5717.87109   | 61.83091     | 5.2239  |

**(S)-1-(3,5-dimethyl-1H-pyrazol-1-yl)hex-5-en-3-ol (3f)**

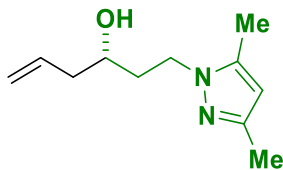

Alcohol **2f** (28.0 mg, 0.18 mmol) was subjected to standard reaction conditions (110 °C, 48 h) with **SL-J502-1** as ligand. Upon flash column chromatography (SiO<sub>2</sub>: 33:66 EtOAc:hexanes) the title compound **3f** was isolated as a yellow oil in 72% yield (26.0 mg, 0.13 mmol, 89% ee).

**TLC (SiO<sub>2</sub>):** R<sub>f</sub> = 0.5 (EtOAc)

**<sup>1</sup>H NMR** (500 MHz, CDCl<sub>3</sub>): δ 5.82 (dt, *J* = 17.1, 8.7 Hz, 1H), 5.77 (s, 1H), 5.14 – 5.06 (m, 2H), 4.18 (ddd, *J* = 14.3, 8.8, 5.3 Hz, 1H), 4.06 (dt, *J* = 14.2, 5.7 Hz, 1H), 3.60 (dtd, *J* = 9.3, 6.2, 2.8 Hz, 1H), 2.26 – 2.23 (m, 2H), 2.22 (s, 3H), 2.19 (s, 3H), 1.96 (dddd, *J* = 14.6, 8.9, 5.8, 2.7 Hz, 1H), 1.74 (ddt, *J* = 14.9, 10.4, 5.4 Hz, 1H).

**<sup>13</sup>C NMR** (126 MHz, CDCl<sub>3</sub>): δ 147.6, 139.1, 135.0, 117.8, 105.1, 68.4, 45.7, 42.1, 36.8, 15.3, 11.1.

**HRMS** (Na<sup>+</sup>, *m/z*): for C<sub>11</sub>H<sub>18</sub>N<sub>2</sub>O: calcd. = 195.1492; found = 195.1491.

**FTIR** (neat): 3319, 3076, 2923, 1550, 1460, 1384, 1062, 909, 797 cm<sup>-1</sup>.

**HPLC:** (Chiralcel column Amylose 2, Hexane: 2-PrOH = 94:06, 0.5 mL/min, 210 nm).

[α]<sub>D</sub><sup>24</sup> = +4.5 (c = 0.1, CHCl<sub>3</sub>).

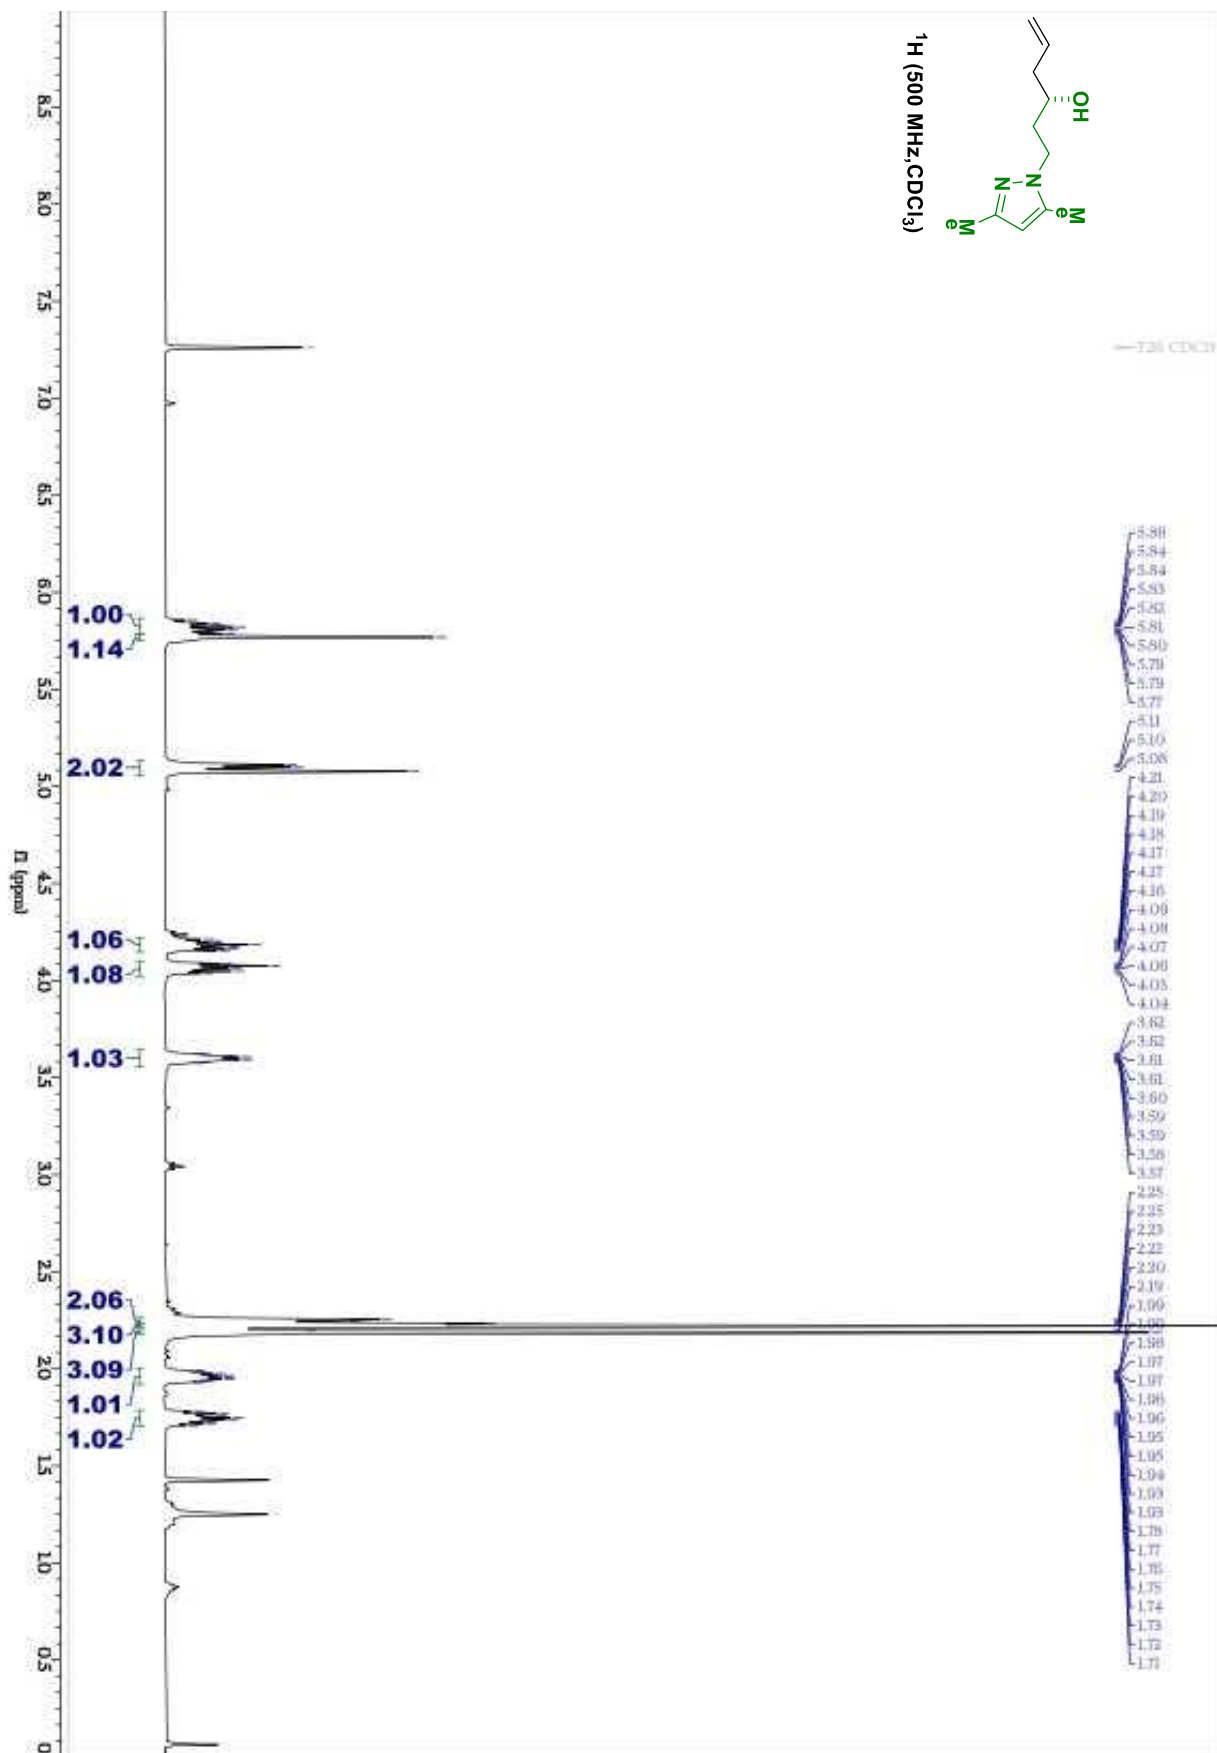

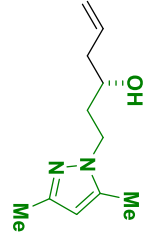

<sup>13</sup>C (126 MHz, CDCl<sub>3</sub>)

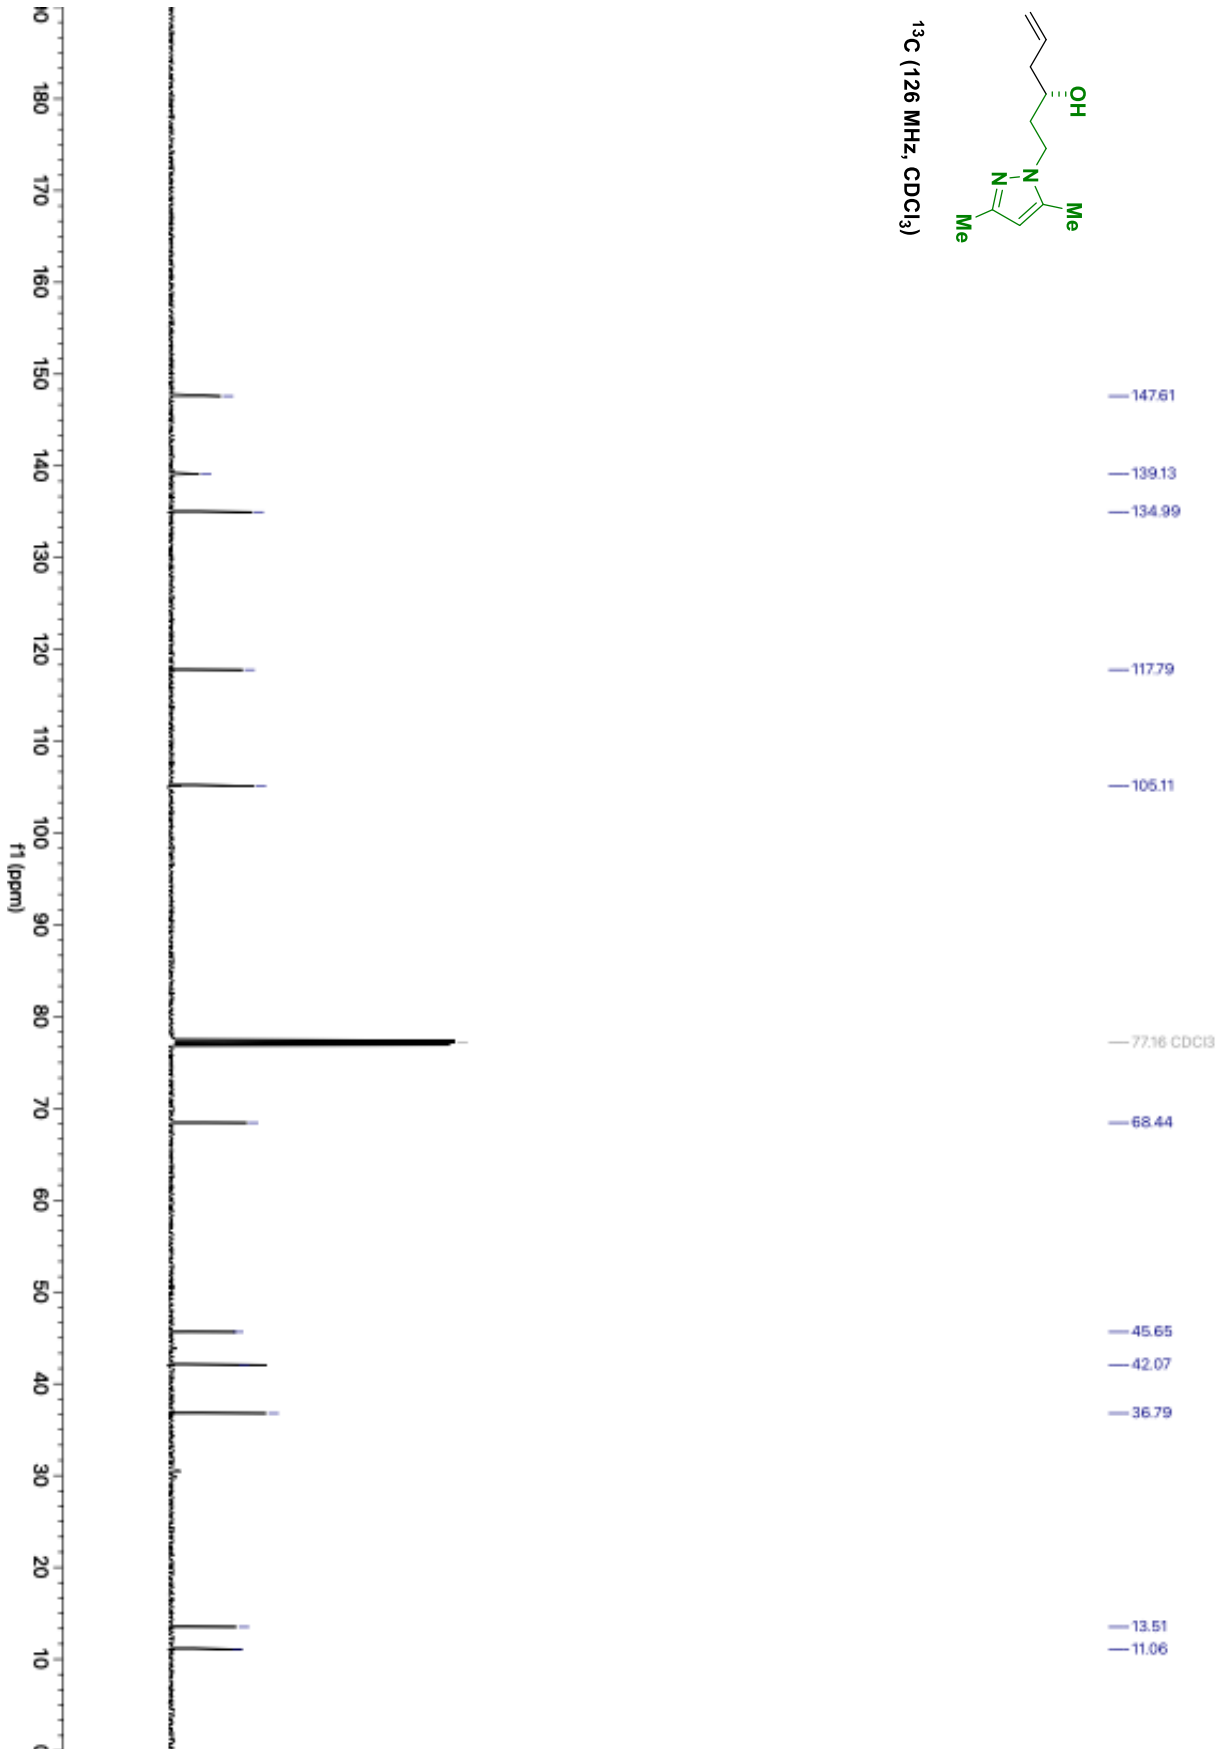

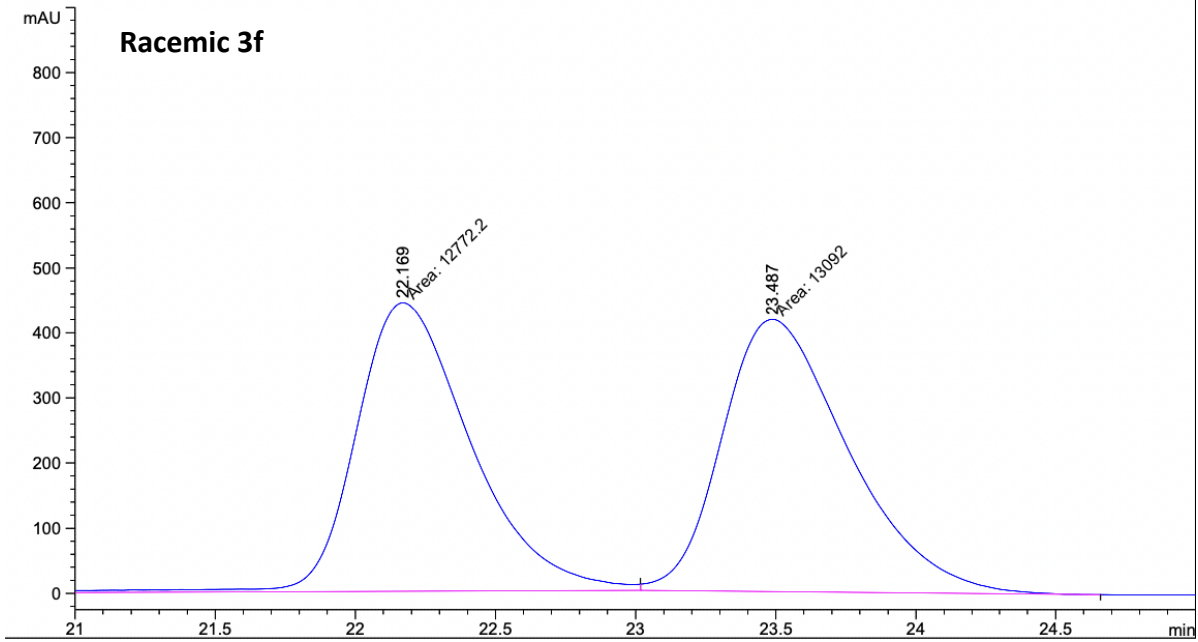

| Peak # | RetTime [min] | Type | Width [min] | Area [mAU*s] | Height [mAU] | Area %  |
|--------|---------------|------|-------------|--------------|--------------|---------|
| 1      | 22.169        | MM   | 0.4798      | 1.27722e4    | 443.65454    | 49.3819 |
| 2      | 23.487        | MM   | 0.5222      | 1.30920e4    | 417.85358    | 50.6181 |

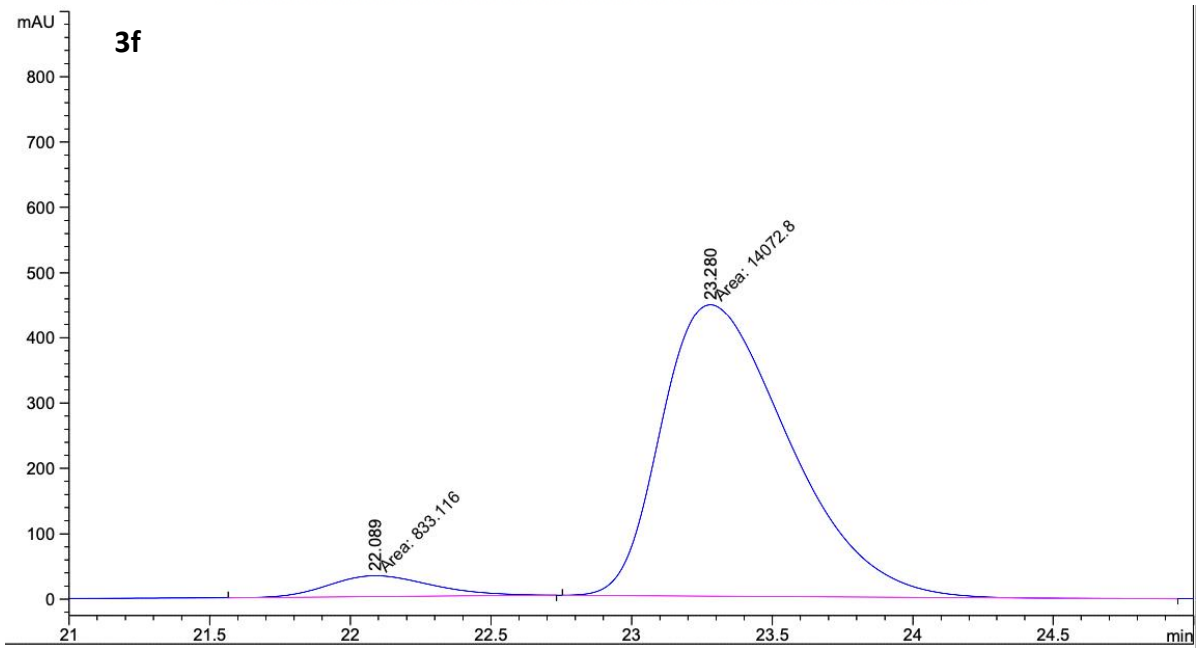

| Peak # | RetTime [min] | Type | Width [min] | Area [mAU*s] | Height [mAU] | Area %  |
|--------|---------------|------|-------------|--------------|--------------|---------|
| 1      | 22.089        | MM   | 0.4307      | 833.11554    | 32.23835     | 5.5892  |
| 2      | 23.280        | MM   | 0.5249      | 1.40728e4    | 446.83960    | 94.4108 |

**(S)-(4-chlorophenyl)(3-(2-hydroxypent-4-en-1-yl)-5-methoxy-2-methyl-1H-indol-1-yl)methanone (3g)**

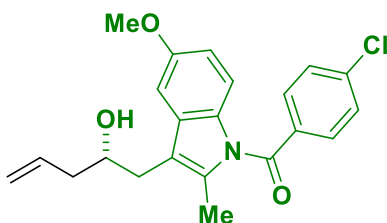

Alcohol **2g** (69.8 mg, 0.2 mmol) was subjected to standard reaction conditions (110 °C, 48 h) with **SL-J502-1** as ligand. Upon flash column chromatography (SiO<sub>2</sub>: 5:95 EtOAc:hexanes) the title compound **3g** was isolated as a brown-yellow oil in 61% yield (46.7 mg, 0.12 mmol, 89% ee).

**TLC (SiO<sub>2</sub>):** R<sub>f</sub> = 0.3 (2:3 EtOAc:Hexanes)

**<sup>1</sup>H NMR** (500 MHz, CDCl<sub>3</sub>): δ 7.68 – 7.62 (m, 2H), 7.49 – 7.44 (m, 2H), 6.95 (s, 1H), 6.89 – 6.83 (m, 1H), 6.69-6.64 (dt, *J* = 9.0, 2.2 Hz, 1H), 5.94 – 5.82 (m, 1H), 5.24 – 5.15 (m, 2H), 4.01 – 3.90 (m, 1H), 3.84 (d, *J* = 1.8 Hz, 3H), 2.87 – 2.82 (m, 2H), 2.43 – 2.35 (m, 4H), 2.31-2.23 (dt, *J* = 15.0, 8.4 Hz, 1H), 1.86 – 1.77 (m, 1H).

**<sup>13</sup>C NMR** (126 MHz, CDCl<sub>3</sub>): δ 168.5, 156.1, 139.3, 135.8, 134.8, 134.2, 131.4, 131.3, 131.1, 129.3 (d, *J* = 3.0 Hz), 118.6, 116.2, 115.1, 111.4, 101.8, 70.7, 55.9, 41.7, 31.9, 29.9, 13.7, 1.2.

**HRMS** (Na<sup>+</sup>, *m/z*): for C<sub>22</sub>H<sub>22</sub>ClNO<sub>3</sub> calcd. = 406.1180; found = 406.1177.

**FTIR** (neat): 3301, 3038, 2684, 1949, 1724, 1608, 1188, 736 cm<sup>-1</sup>.

**HPLC:** (Phenomenex LC Column Cellulose-5, Hexane: 2-PrOH = 94:06, 0.5 mL/120min, 254 nm).

**[α]<sub>D</sub><sup>24</sup>** = +24.2 (c = 0.4, CHCl<sub>3</sub>)

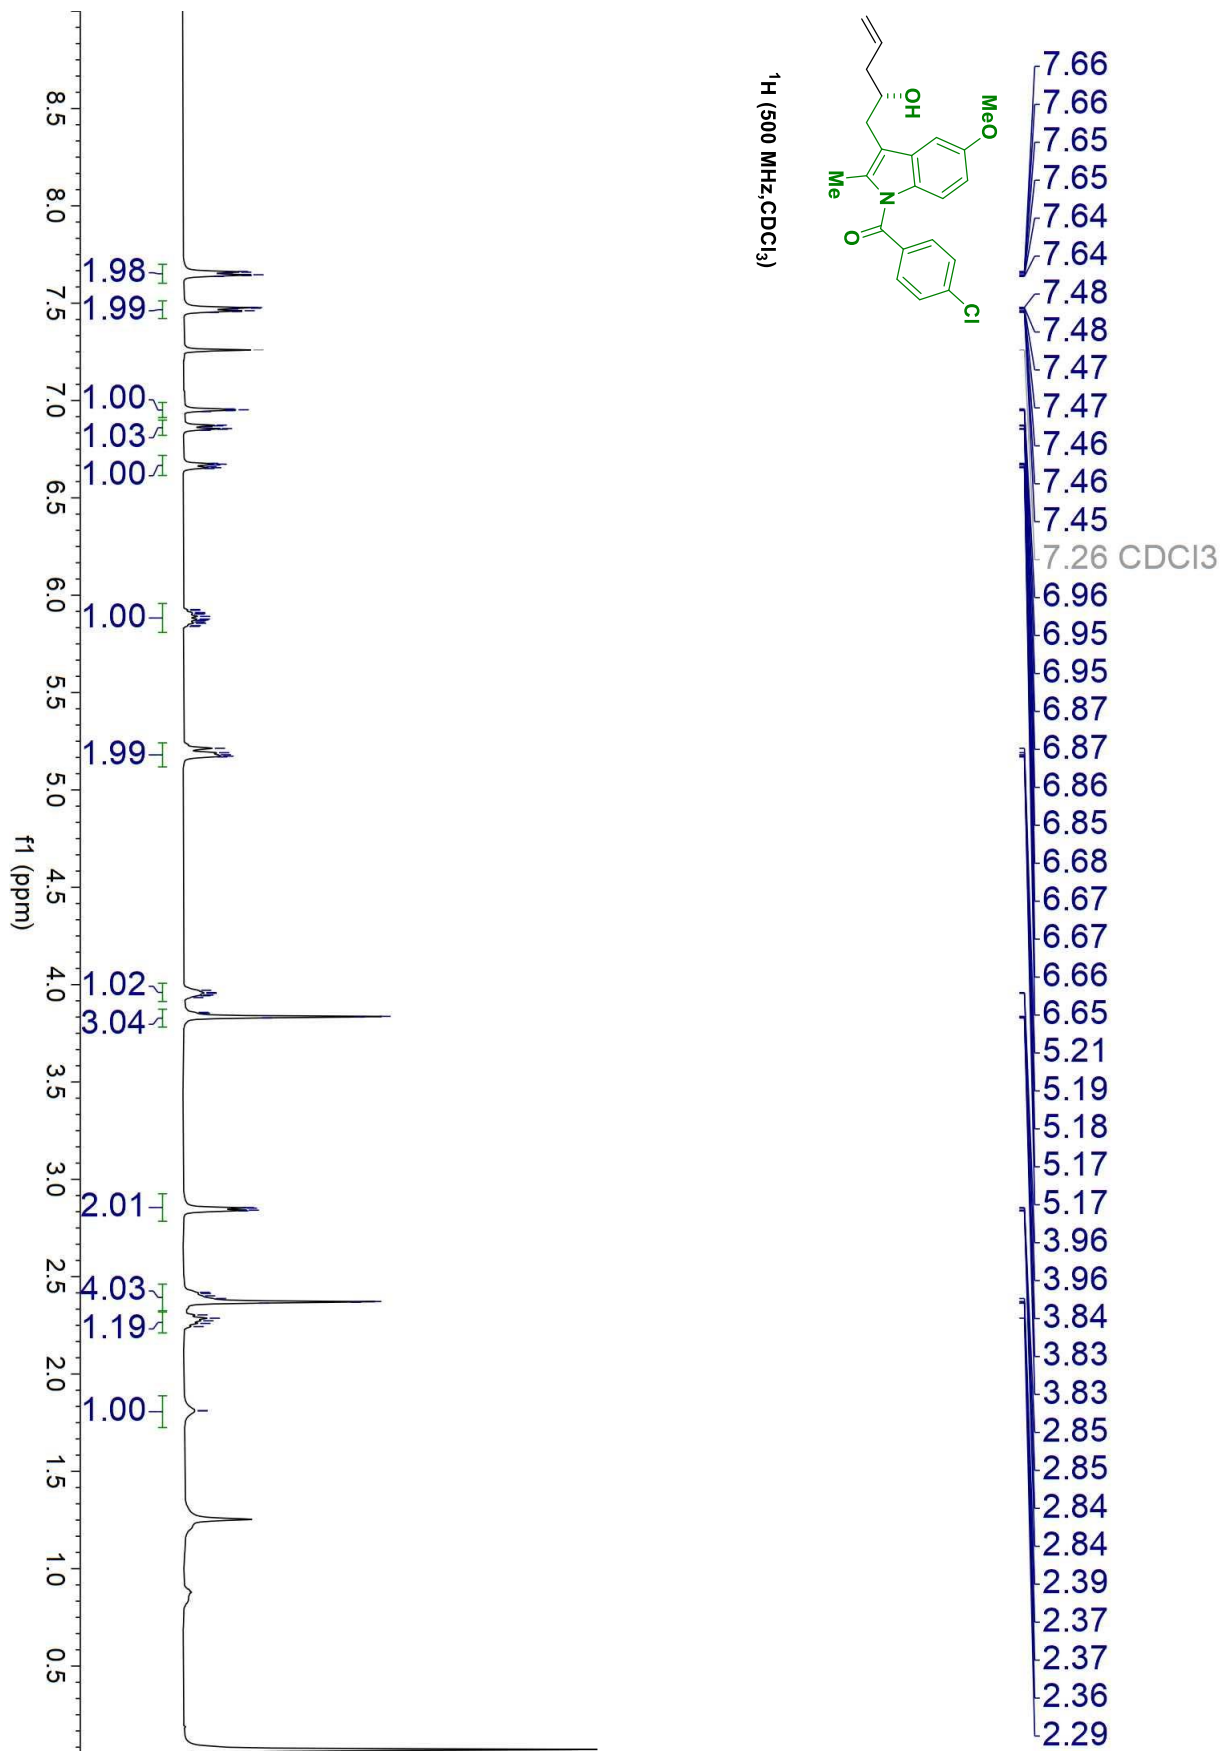



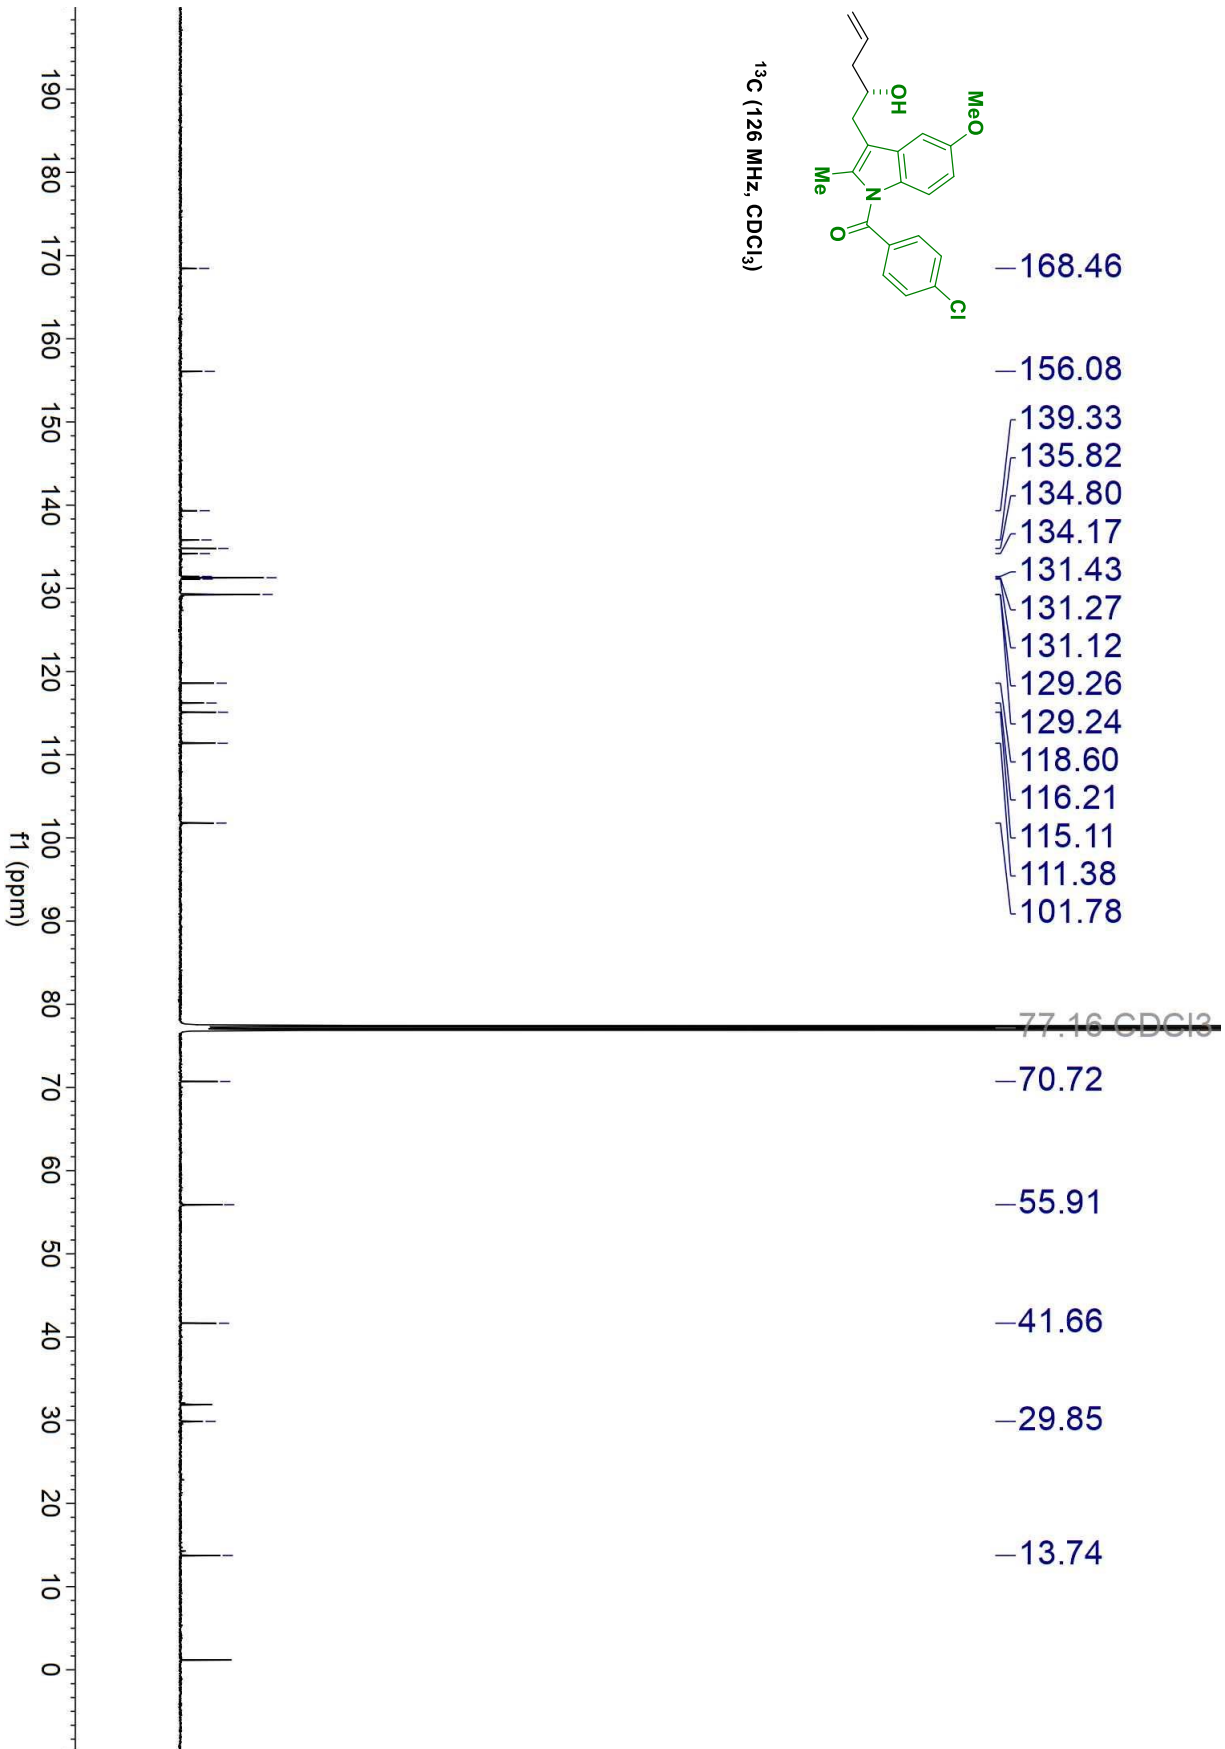

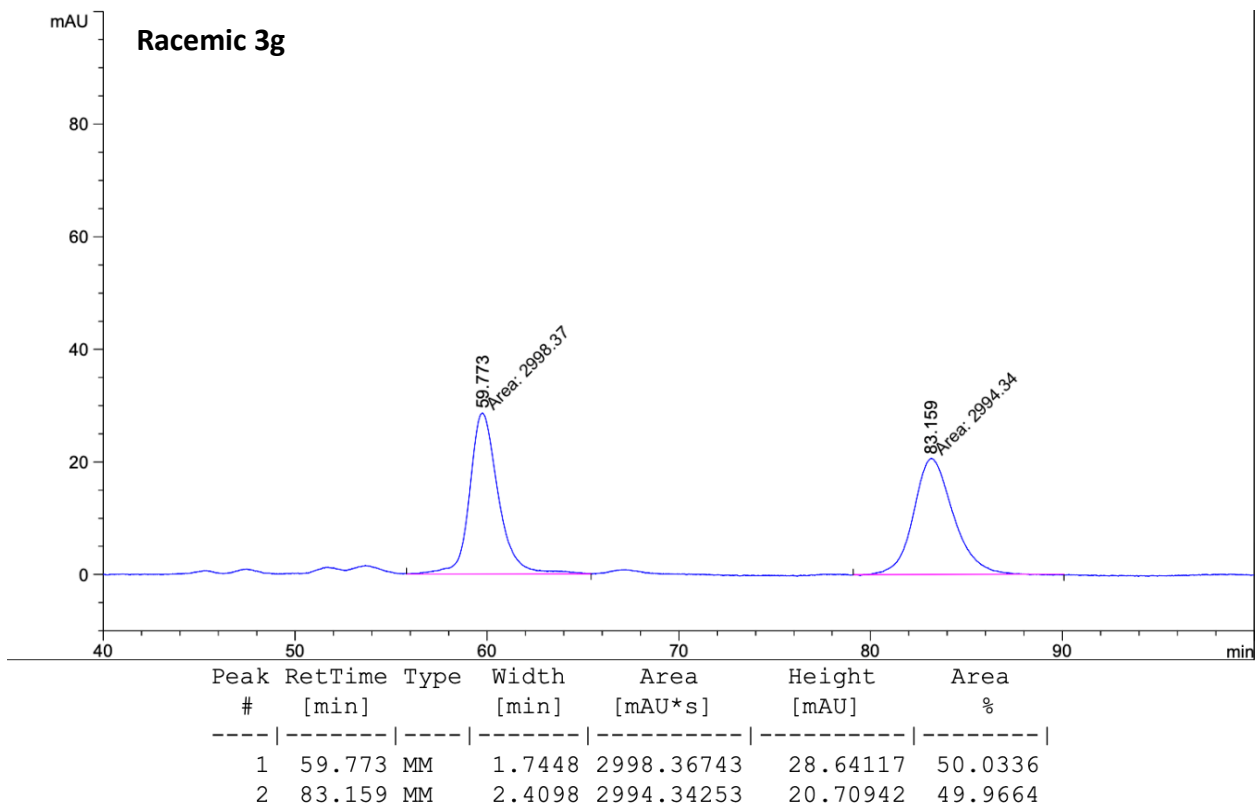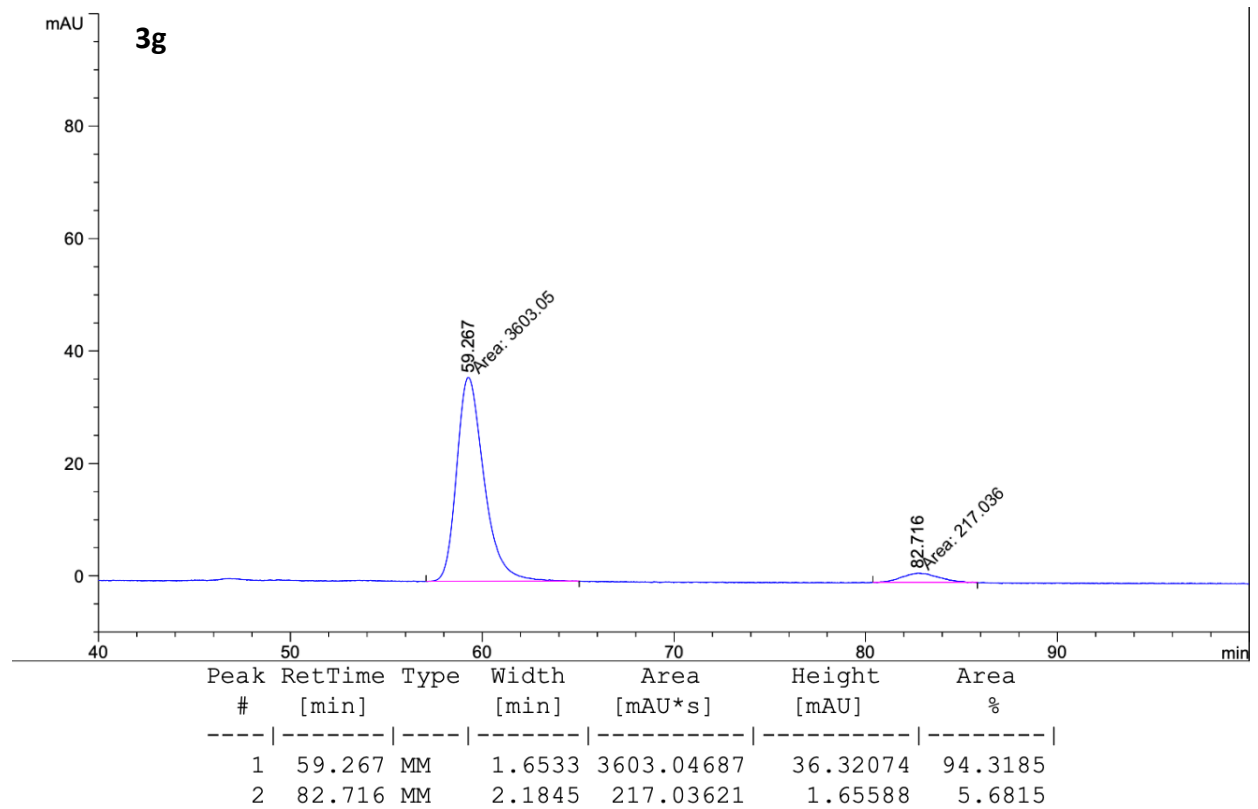

**(2R,4S)-hept-6-ene-2,4-diol (3h)**

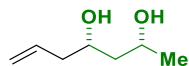

Alcohol **2h** (18.0 mg, 0.2 mmol) was subjected to standard reaction conditions with **SL-J502-01** as ligand (110 °C, 48 h). Upon flash column chromatography (SiO<sub>2</sub>: 20:80 EtOAc:hexanes) the title compound **3h** was isolated as a yellow oil in 98% yield (25.5 mg, 0.19 mmol, >20:1 dr).

**TLC (SiO<sub>2</sub>):** R<sub>f</sub> = 0.5 (1:2 EtOAc:hexanes)

**<sup>1</sup>H NMR** (500 MHz, C<sub>6</sub>D<sub>6</sub>): δ 5.73 (ddt, J = 15.8, 11.4, 7.2 Hz, 1H), 5.02 (d, J = 1.4 Hz, 1H), 5.01 – 4.97 (m, 1H), 3.79 (dq, J = 8.6, 6.1, 2.2 Hz, 1H), 3.68 – 3.59 (m, 1H), 3.25 (d, J = 18.0 Hz, 2H), 2.14 – 1.99 (m, 2H), 1.37 (dt, J = 14.3, 10.1 Hz, 1H), 1.21 (dt, J = 14.3, 2.3 Hz, 1H), 1.04 (d, J = 6.2 Hz, 3H).

**<sup>13</sup>C NMR** (130 MHz, C<sub>6</sub>D<sub>6</sub>): δ 135.1, 117.5, 72.1, 68.9, 44.3, 43.0, 24.3.

**HRMS** (H<sup>+</sup>, *m/z*): for C<sub>7</sub>H<sub>14</sub>O<sub>2</sub>: calcd. = 130.0994; found = 130.0995.

**FTIR** (neat): 3364, 2970, 2931, 1642, 1432, 1375, 1325, 1081 cm<sup>-1</sup>.

**[α]<sub>D</sub><sup>24</sup>** = -24.0 (c = 1.0, CHCl<sub>3</sub>).

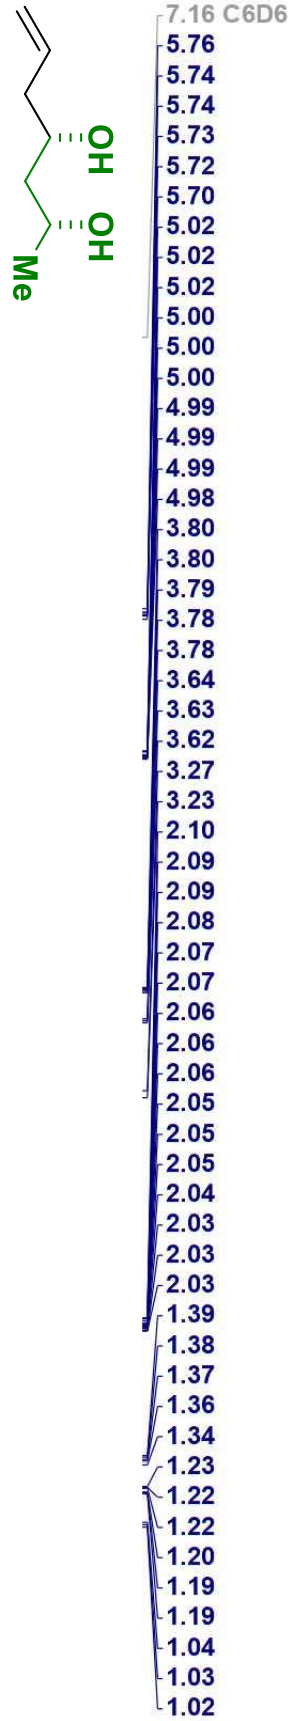

$^1\text{H}$  (500 MHz,  $\text{C}_6\text{D}_6$ )

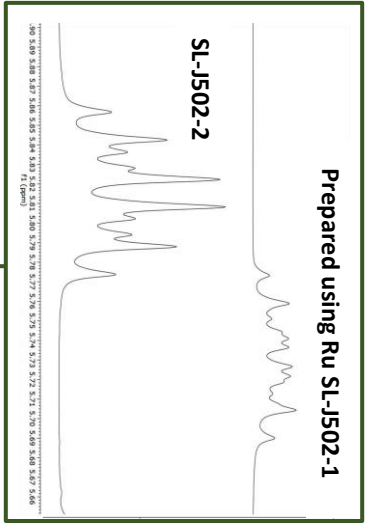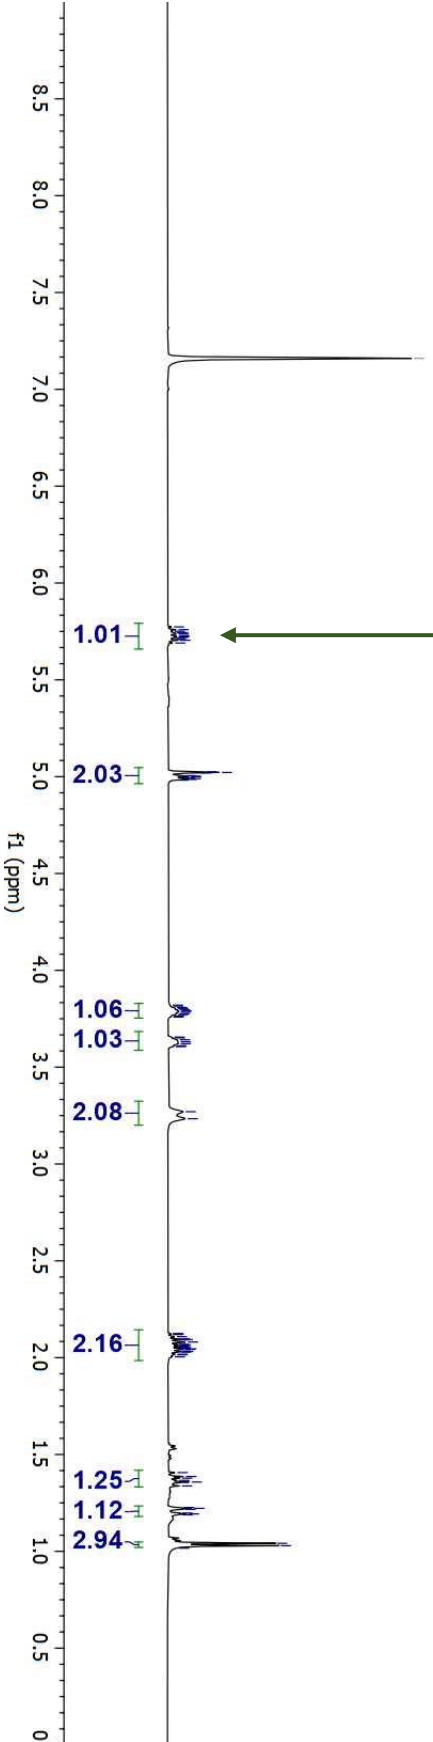

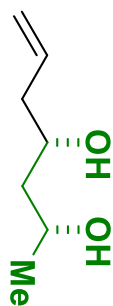

$^{13}\text{C}$  (130 MHz,  $\text{C}_6\text{D}_6$ )

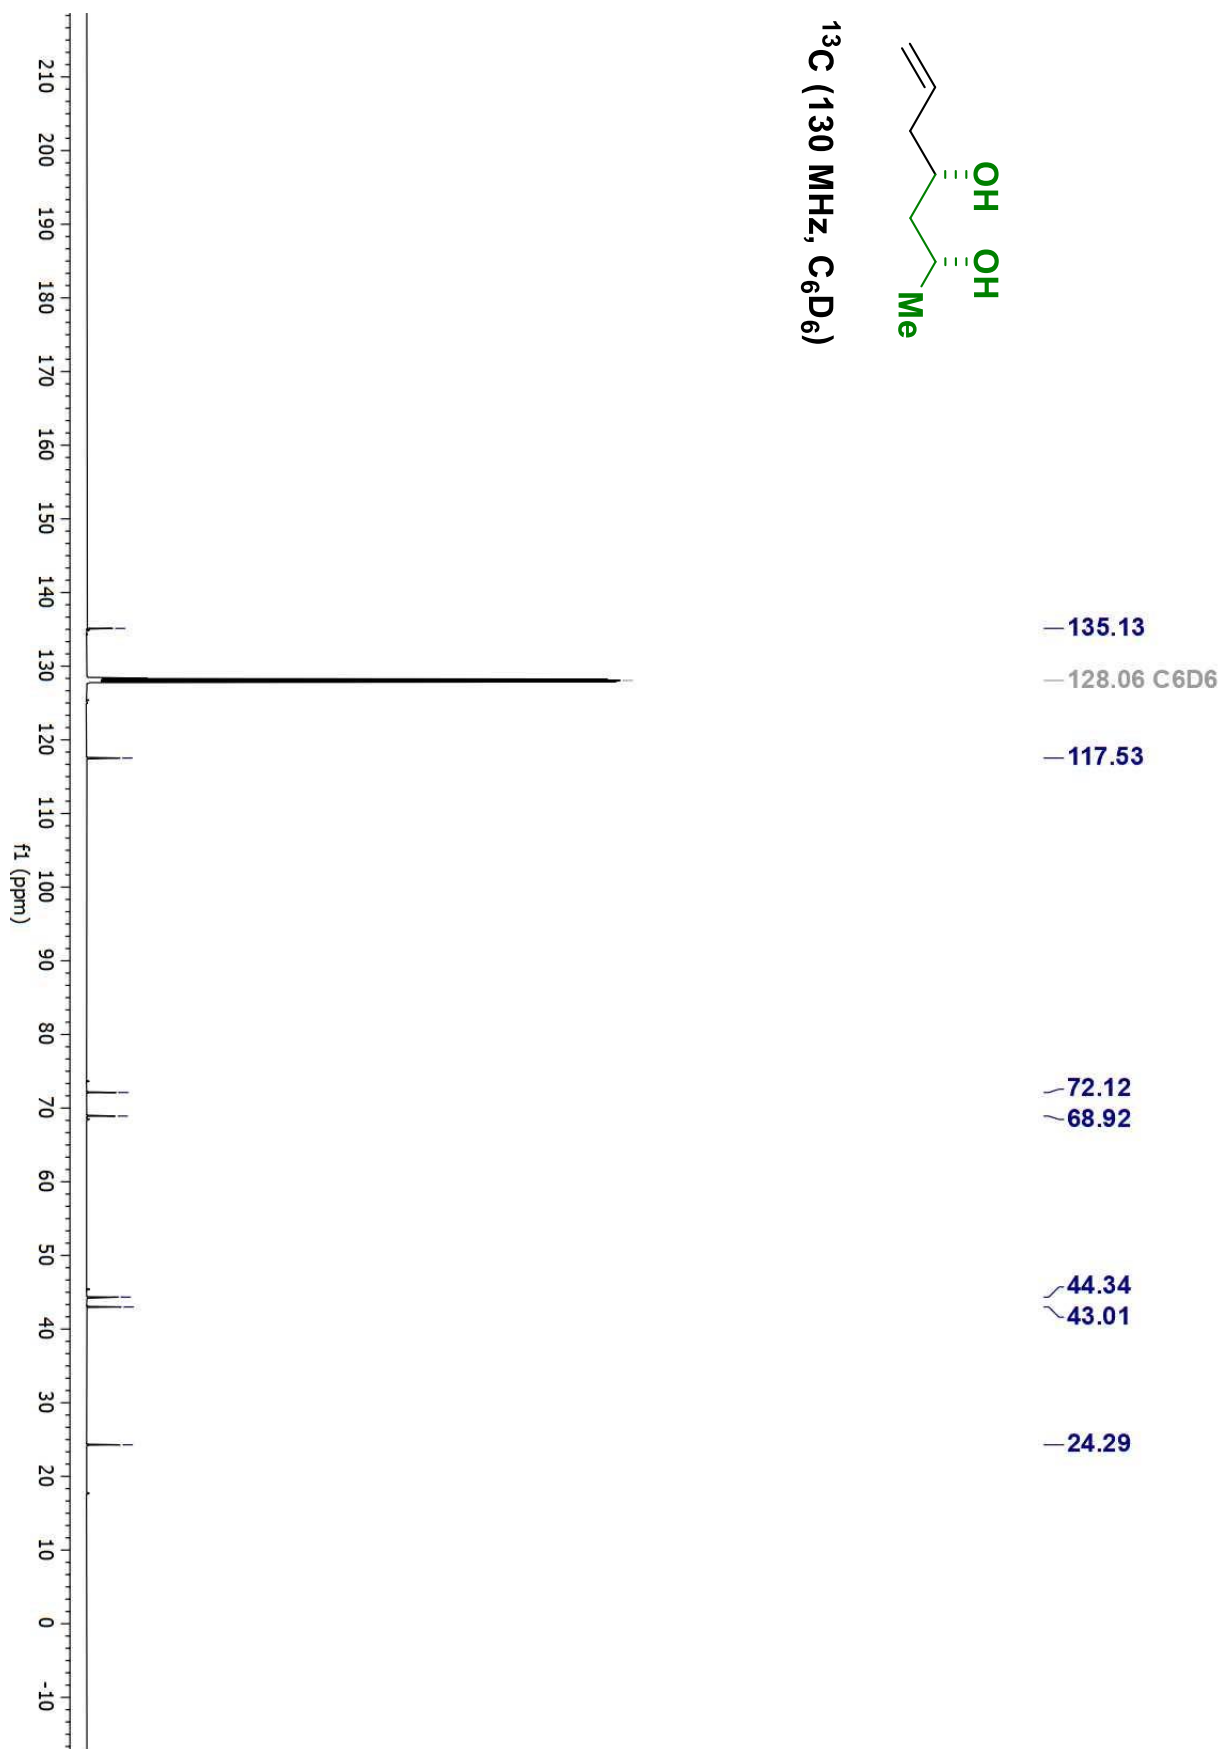

**(2R,4R)-hept-6-ene-2,4-diol (*epi*-3h)**

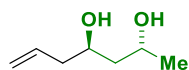

Alcohol **2h** (18.0 mg, 0.2 mmol) was subjected to standard reaction conditions with **SL-J502-02** as ligand (110 °C, 48 h). Upon flash column chromatography (SiO<sub>2</sub>: 20:80 EtOAc:hexanes) the title compound ***epi*-3h** was isolated as a yellow oil in 96% yield (24.9 mg, 0.19 mmol, >20:1 dr).

**TLC (SiO<sub>2</sub>):** R<sub>f</sub> = 0.5 (1:2 EtOAc:hexanes)

**<sup>1</sup>H NMR** (500 MHz, C<sub>6</sub>D<sub>6</sub>): δ 5.82 (ddt, J = 17.2, 10.1, 7.0 Hz, 1H), 5.09 – 5.02 (m, 2H), 4.09 (dq, J = 6.3, 6.2, 6.2 Hz, 1H), 3.98 – 3.90 (m, 1H), 3.52 (s, 2H), 2.28 – 2.21 (m, 1H), 2.18 – 2.10 (m, 1H), 1.49 – 1.43 (m, 2H), 1.14 (d, J = 6.2 Hz, 3H).

**<sup>13</sup>C NMR** (130 MHz, C<sub>6</sub>D<sub>6</sub>): δ 135.6, 117.3, 68.3, 65.1, 44.3, 42.5, 23.7.

**HRMS** (H<sup>+</sup>, *m/z*): for C<sub>7</sub>H<sub>14</sub>O<sub>2</sub>: calcd. = 130.0994; found = 130.0995.

**FTIR** (neat): 3365, 2973, 2934, 1646, 1435, 1379, 1325, 1081 cm<sup>-1</sup>.

**[α]<sub>D</sub><sup>24</sup>** = 22.5 (c = 0.61, CHCl<sub>3</sub>).

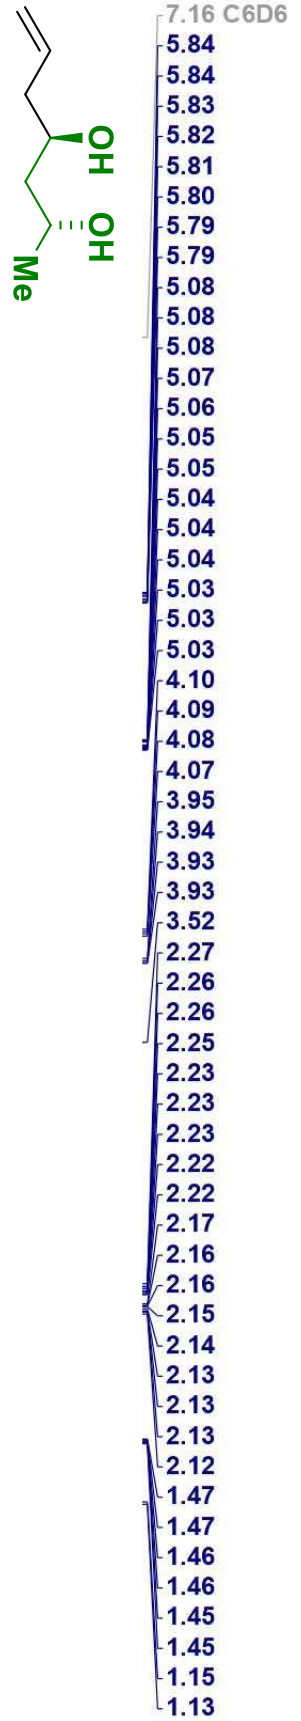

$^1\text{H}$  (500 MHz,  $\text{C}_6\text{D}_6$ )

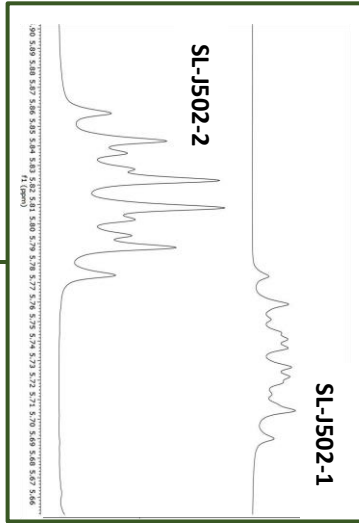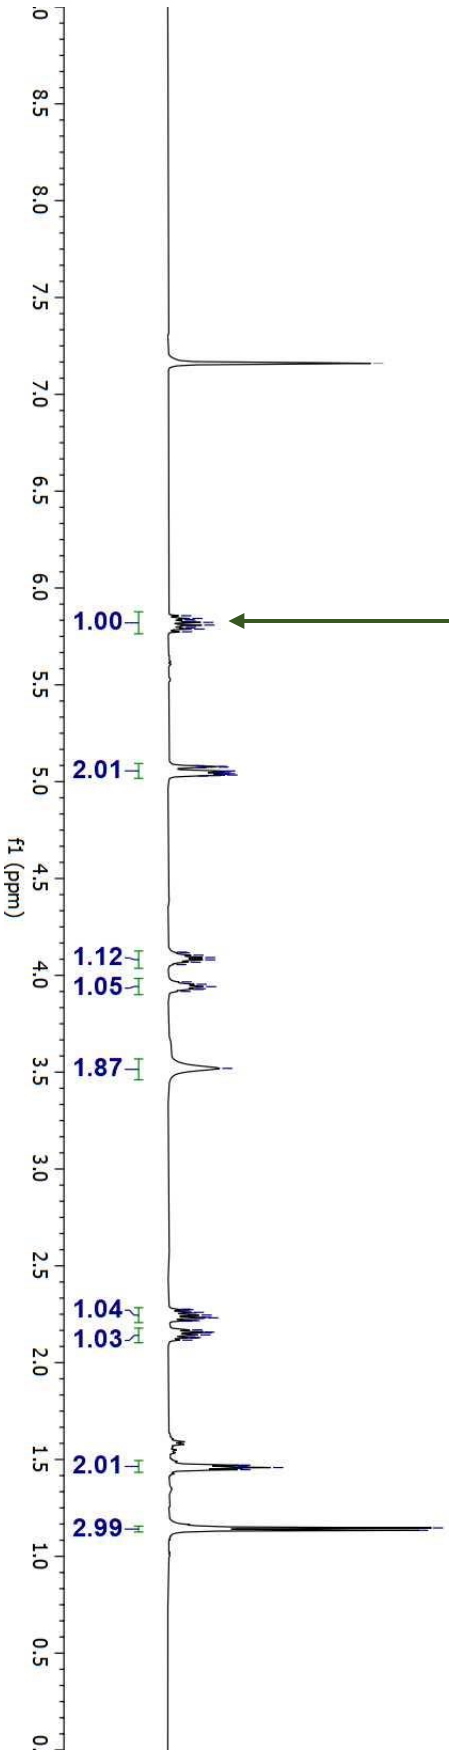

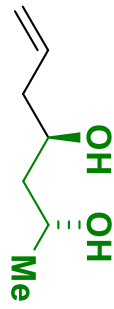

$^{13}\text{C}$  (130 MHz,  $\text{C}_6\text{D}_6$ )

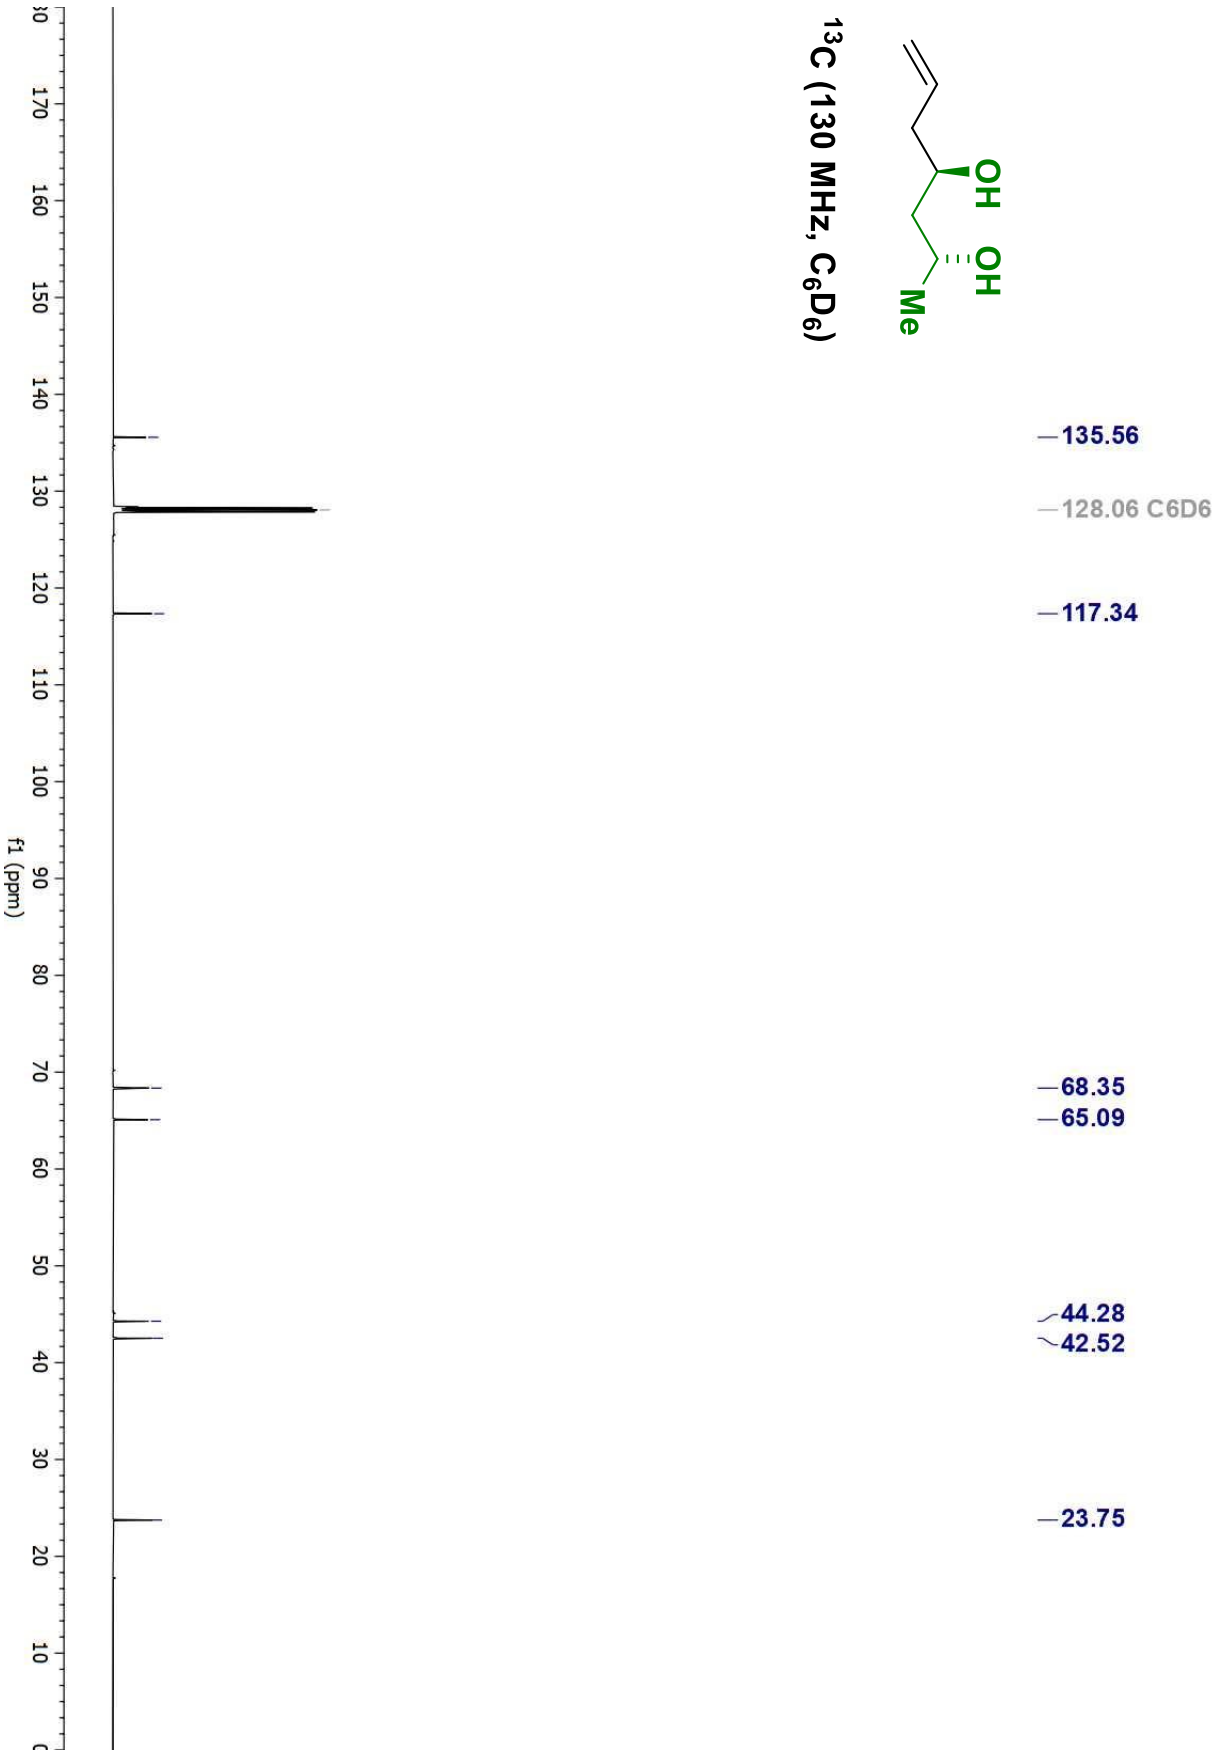



**(3R,5S)-1-(benzyloxy)oct-7-ene-3,5-diol (3i)**

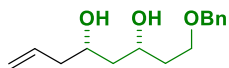

Alcohol **2i** (42.0 mg, 0.2 mmol) was subjected to standard reaction conditions with **SL-J502-1** as ligand (110 °C, 48 h). Upon flash column chromatography (SiO<sub>2</sub>: 10:90 EtOAc:hexanes) the title compound **3i** was isolated as a yellow oil in 94% yield (47.9 mg, 0.19 mmol, >20:1 dr).

**TLC (SiO<sub>2</sub>):** R<sub>f</sub> = 0.5 (1:4 EtOAc:hexanes)

**<sup>1</sup>H NMR** (500 MHz, C<sub>6</sub>D<sub>6</sub>): δ 7.21 (d, J = 7.6 Hz, 2H), 7.17 (s, 1H), 7.14 (s, 1H), 7.09 (t, J = 7.3 Hz, 1H), 5.84 (ddt, J = 17.3, 10.8, 7.1 Hz, 1H), 5.05 (d, J = 6.8 Hz, 1H), 5.02 (s, 1H), 4.20 (d, J = 3.1 Hz, 2H), 3.95 – 3.85 (m, 1H), 3.78 (dt, J = 11.9, 6.4 Hz, 1H), 3.70 (s, 1H), 3.47 – 3.37 (m, 2H), 3.32 (td, J = 8.5, 4.5 Hz, 1H), 2.21 (dt, J = 13.8, 6.9 Hz, 1H), 2.12 (dt, J = 13.4, 6.4 Hz, 1H), 1.62 (dp, J = 16.9, 4.3 Hz, 1H), 1.49 (dt, J = 14.5, 10.1 Hz, 1H), 1.41 (ddt, J = 14.2, 6.7, 3.7 Hz, 1H), 1.28 (dt, J = 14.4, 2.4 Hz, 1H).

**<sup>13</sup>C NMR** (130 MHz, C<sub>6</sub>D<sub>6</sub>): δ 138.7, 135.5, 128.7, 128.4, 128.0, 117.2, 73.3, 72.1, 72.0, 68.7, 43.0, 43.0, 37.6.

**HRMS** (H<sup>+</sup>, *m/z*): for C<sub>15</sub>H<sub>22</sub>O<sub>3</sub> : calcd. = 251.2114; found = 251.2100.

**FTIR** (neat): 3394, 1650, 1625, 1589, 1574, 1337, 1285, 1188, 1100, 1076 cm<sup>-1</sup>.

[α]<sub>D</sub><sup>24</sup> = 21 (c = 0.81, CHCl<sub>3</sub>).

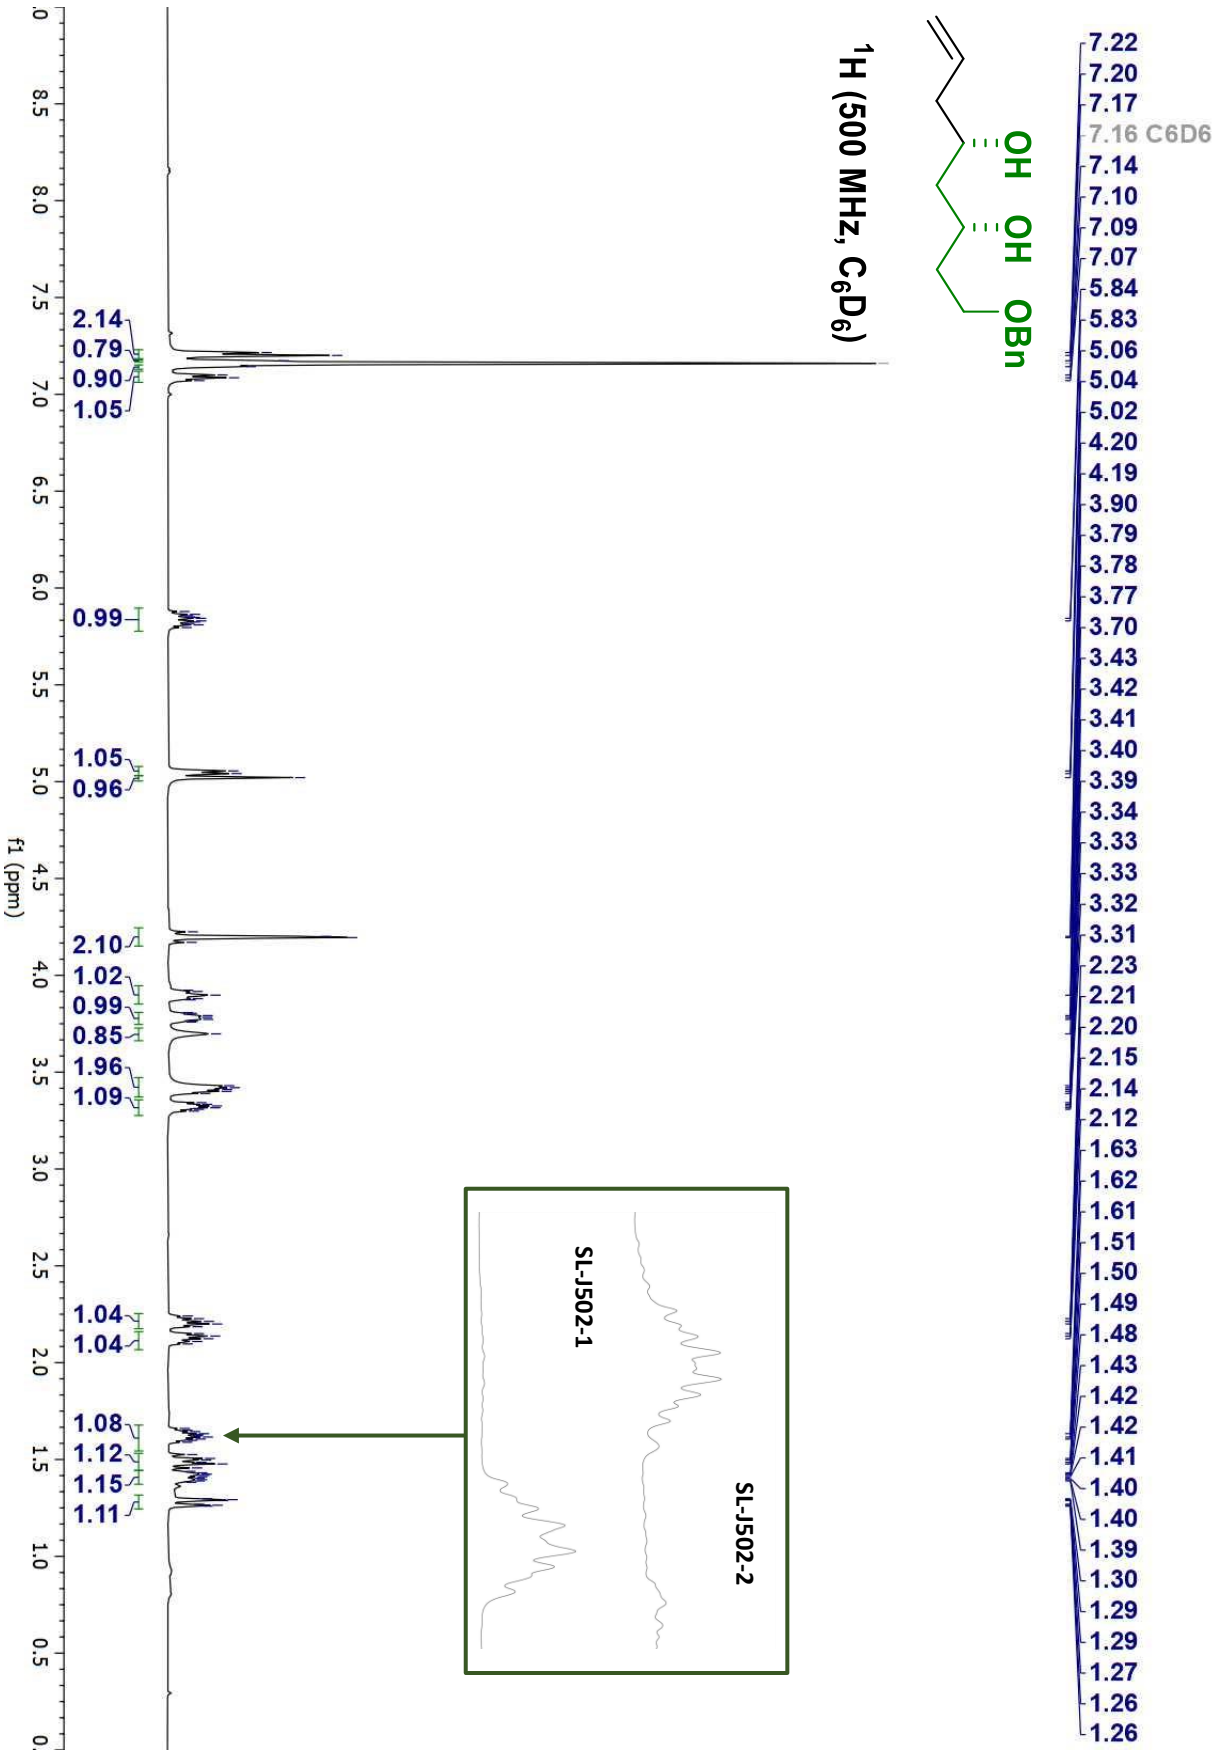

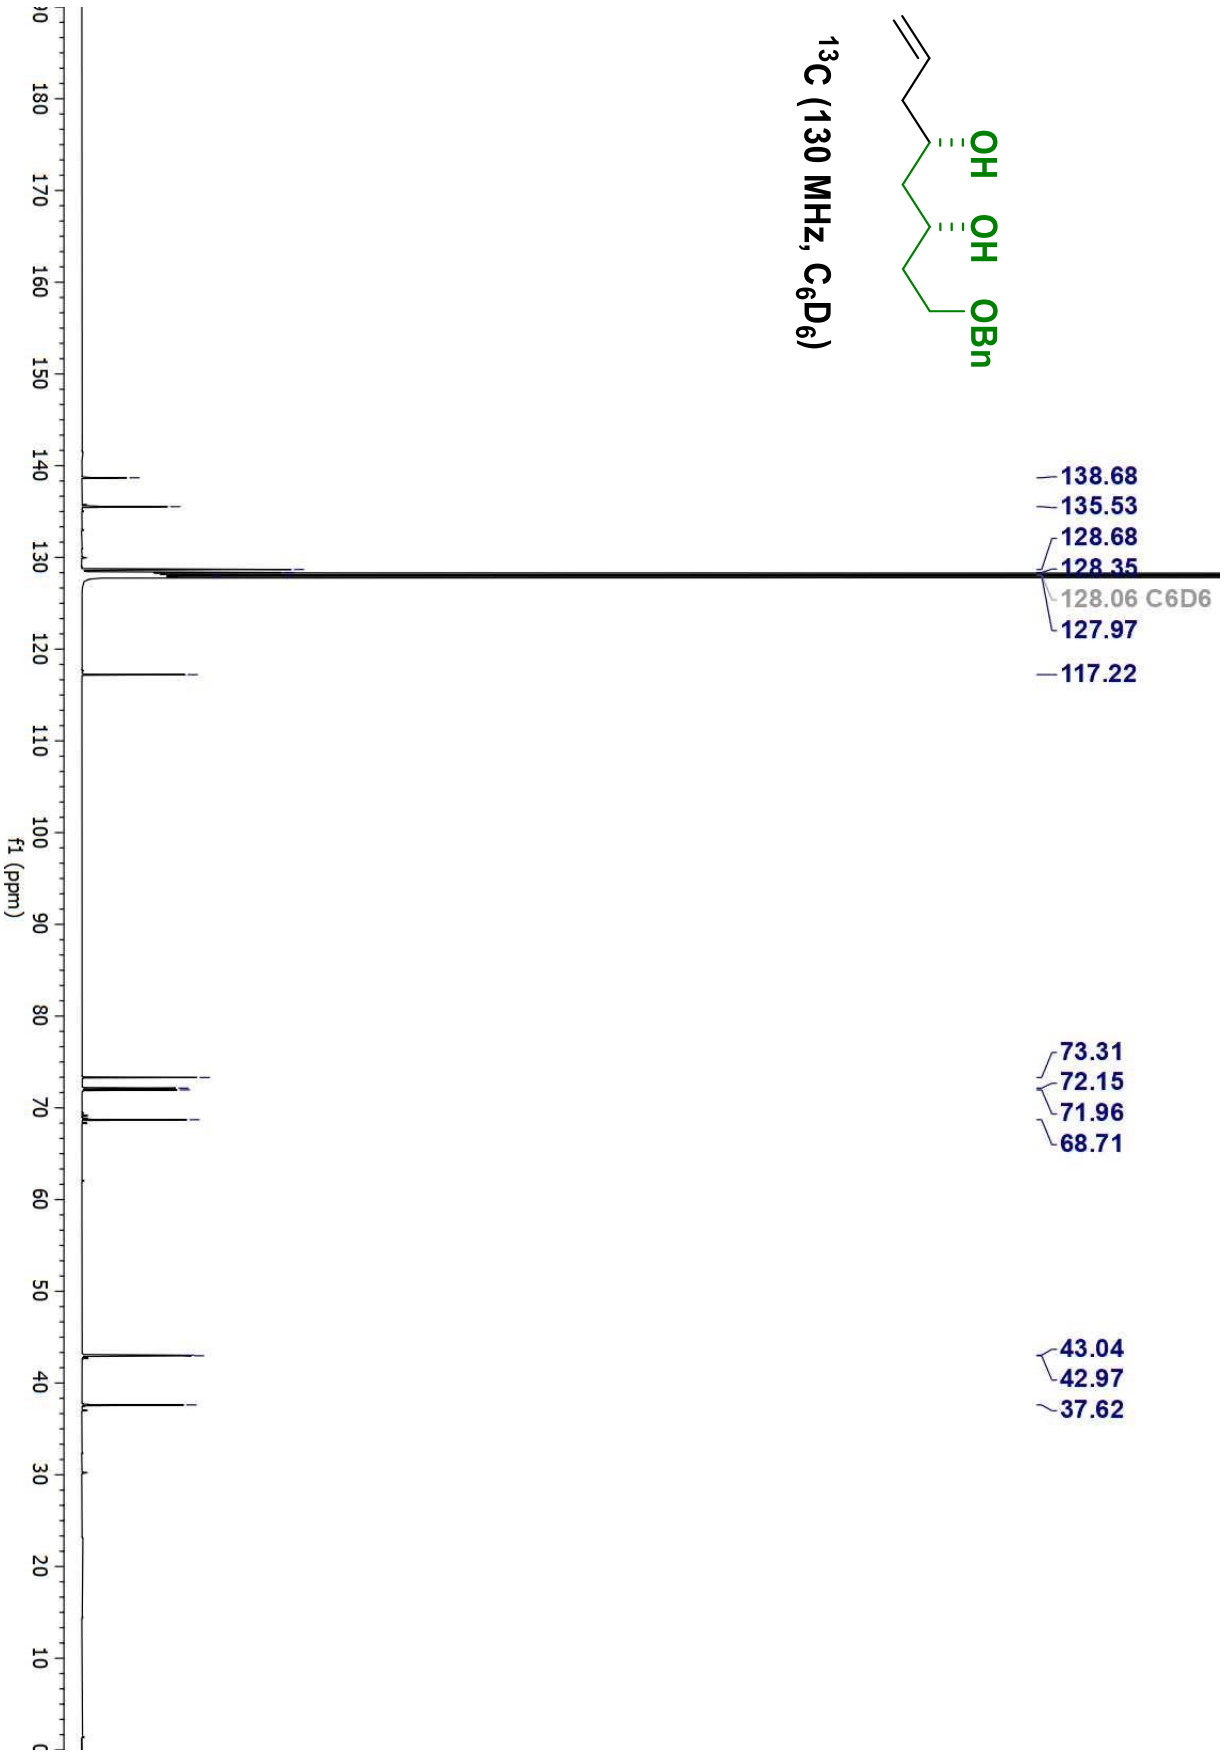

**(3R,5R)-1-(benzyloxy)oct-7-ene-3,5-diol (*epi-3i*)**

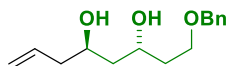

Alcohol **2i** (42.0 mg, 0.2 mmol) was subjected to standard reaction conditions with **SL-J502-02** as ligand (110 °C, 48 h). Upon flash column chromatography (SiO<sub>2</sub>: 10:90 EtOAc:hexanes) the title compound ***epi-3i*** was isolated as a yellow oil in 92% yield (47.0 mg, 0.19 mmol, >20:1 dr).

**TLC (SiO<sub>2</sub>):** R<sub>f</sub> = 0.5 (1:4 EtOAc:hexanes)

**<sup>1</sup>H NMR** (500 MHz, C<sub>6</sub>D<sub>6</sub>): δ 7.21 (d, J = 7.4 Hz, 2H), 7.14 (s, 1H), 7.08 (t, J = 7.3 Hz, 1H), 5.80 (ddt, J = 17.3, 10.2, 7.2 Hz, 1H), 5.02 (qd, J = 11.7, 5.1 Hz, 2H), 4.21 (d, J = 5.3 Hz, 2H), 4.12 (q, J = 7.0 Hz, 1H), 3.96 (p, J = 6.0 Hz, 1H), 3.41 (dt, J = 10.3, 5.3 Hz, 1H), 3.34 (dp, J = 9.0, 4.8 Hz, 2H), 2.76 (s, 1H), 2.23 (dt, J = 14.2, 7.2 Hz, 1H), 2.13 (dt, J = 13.5, 6.3 Hz, 1H), 1.81 – 1.66 (m, 1H), 1.49 (dd, J = 5.5, 3.0 Hz, 1H), 1.43 (dt, J = 14.3, 5.5 Hz, 1H), 1.35 (q, J = 14.0 Hz, 1H).

**<sup>13</sup>C NMR** (130 MHz, C<sub>6</sub>D<sub>6</sub>): δ 138.7, 135.7, 128.7, 128.4, 128.2, 117.2, 73.3, 69.1, 68.7, 68.3, 42.9, 42.7, 37.1.

**HRMS** (H<sup>+</sup>, *m/z*): for C<sub>15</sub>H<sub>22</sub>O<sub>3</sub> : calcd. = 251.2114; found = 251.2100.

**FTIR** (neat): 3394, 1650, 1625, 1589, 1574, 1337, 1285, 1188, 1100, 1076 cm<sup>-1</sup>.

[α]<sub>D</sub><sup>24</sup> = -13.2 (c = 1.0, CHCl<sub>3</sub>).

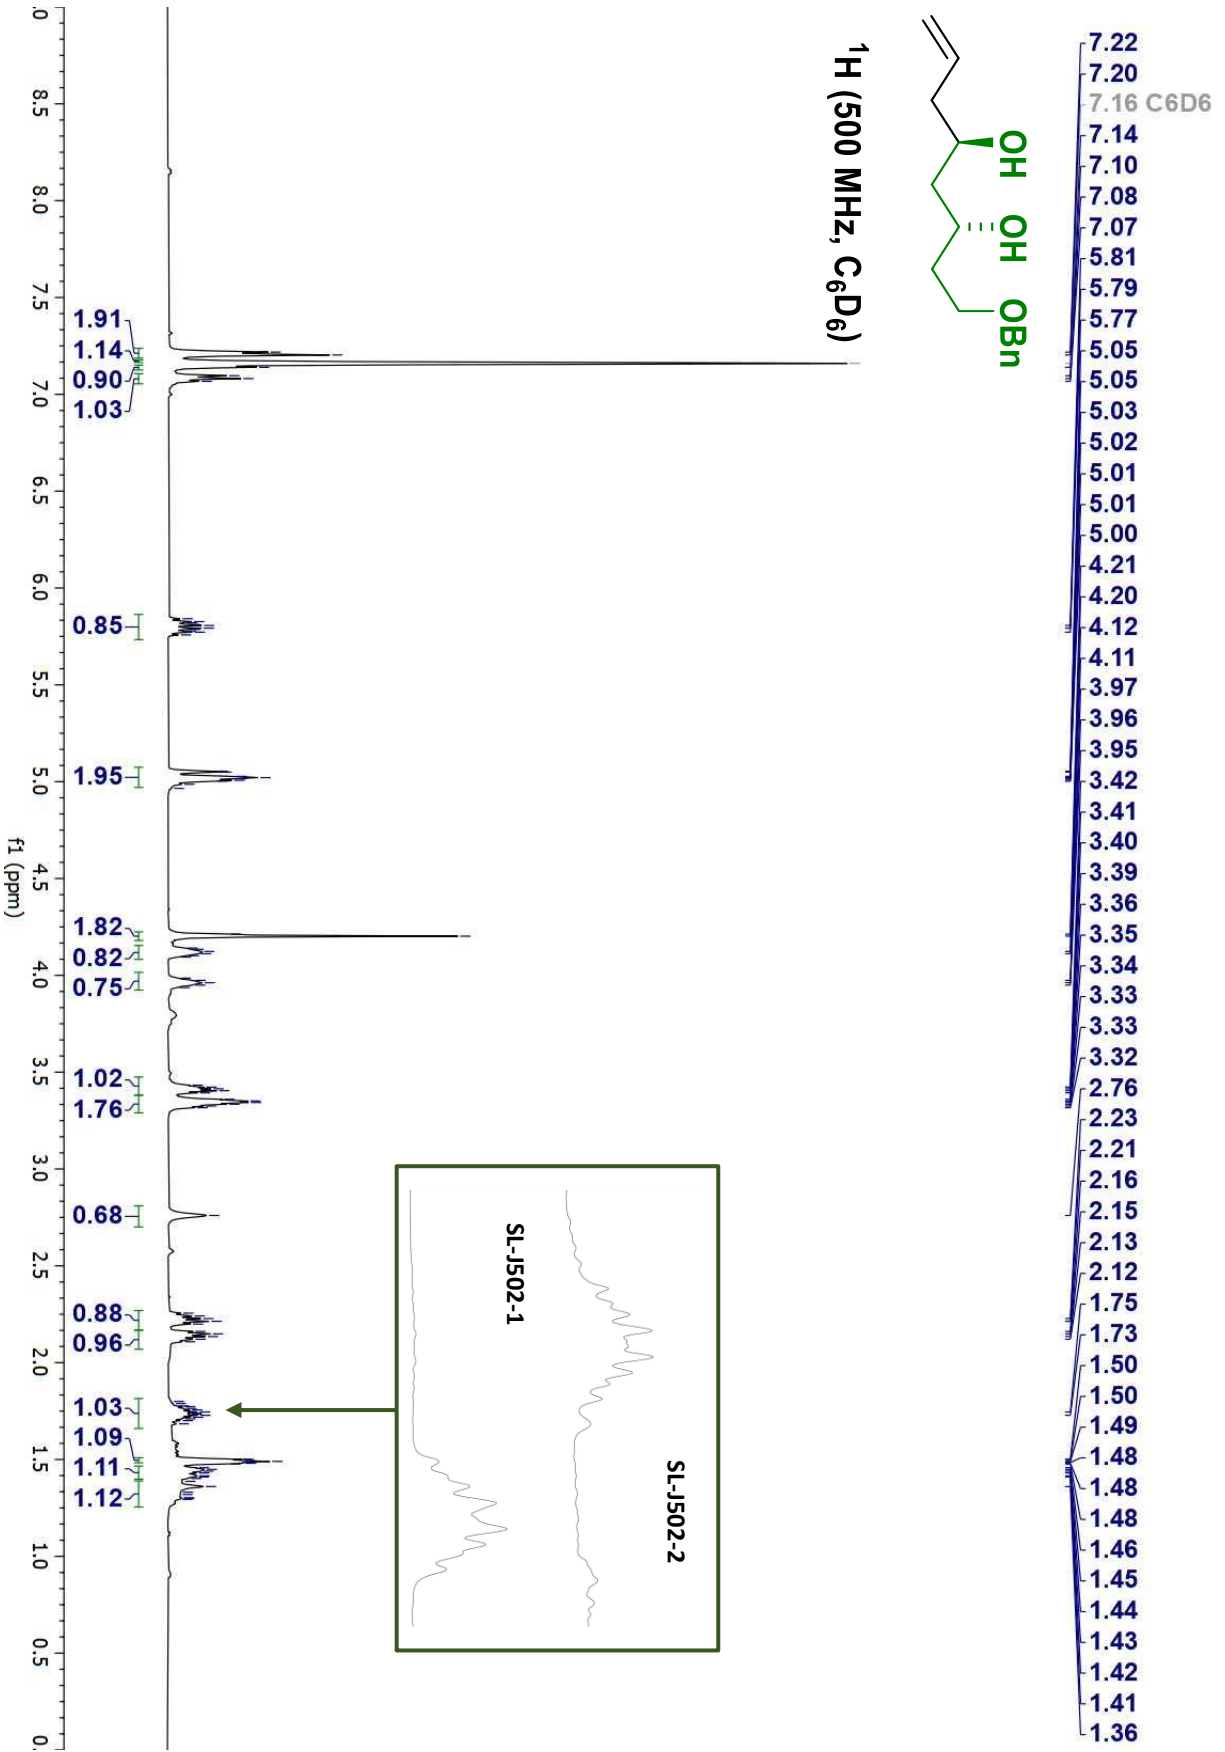

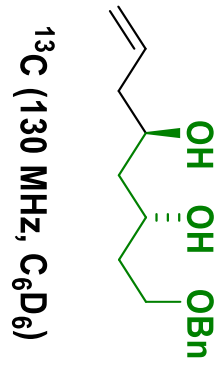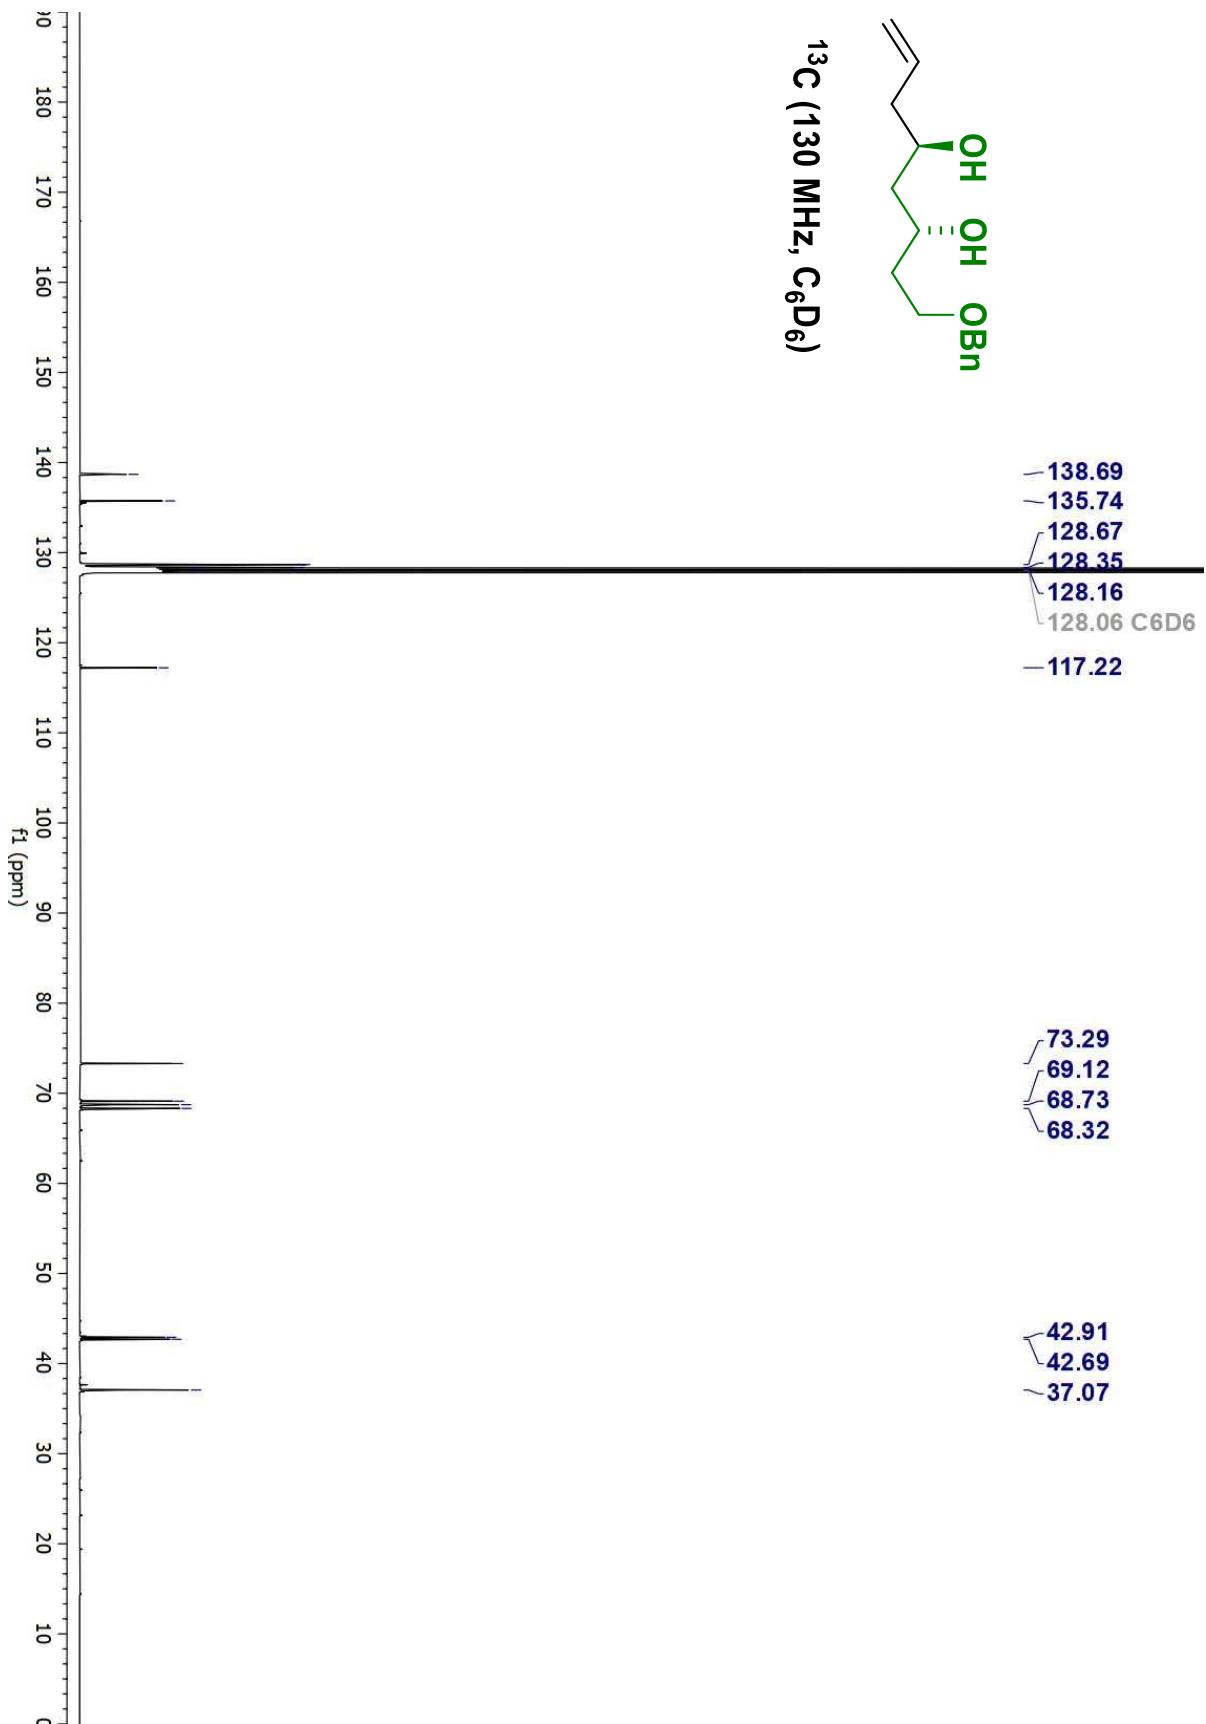

**(S)-1-((S)-2,2-dimethyl-1,3-dioxolan-4-yl)pent-4-en-2-ol (3j)**

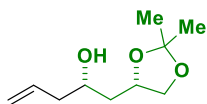

Alcohol **2j** (29.2 mg, 0.2 mmol) was subjected to standard reaction conditions with **SL-J502-1** as ligand (110 °C, 48 h). Upon flash column chromatography (SiO<sub>2</sub>: 1:99 EtOAc:hexanes) the title compound **3j** was isolated as a yellow oil in 92% yield (34.7 mg, 0.19 mmol, >20:1 dr).

**TLC (SiO<sub>2</sub>):** R<sub>f</sub> = 0.5 (1:8 EtOAc:hexanes)

**<sup>1</sup>H NMR** (500 MHz, C<sub>6</sub>D<sub>6</sub>): δ 5.93 – 5.69 (m, 1H), 5.07 – 5.00 (m, 2H), 3.95 (dddd, J = 9.4, 7.6, 6.1, 4.1, 2.2 Hz, 1H), 3.75 – 3.66 (m, 2H), 3.29 – 3.23 (m, 1H), 2.90 – 2.83 (m, 1H), 2.27 – 2.09 (m, 2H), 1.55 – 1.43 (m, 1H), 1.31 (s, 3H), 1.28 (dt, J = 4.4, 2.5 Hz, 1H), 1.24 (s, 3H).

**<sup>13</sup>C NMR** (130 MHz, C<sub>6</sub>D<sub>6</sub>): δ 135.5, 117.3, 109.3, 75.7, 70.2, 69.8, 42.4, 40.1, 27.0, 25.9.

**HRMS** (Na<sup>+</sup>, *m/z*): for C<sub>10</sub>H<sub>18</sub>O<sub>3</sub> : calcd. = 209.1148; found = 209.1147.

**FTIR** (neat): 2984, 2935, 1774, 1370, 1215, 1157, 1057, 996, 915, 862 cm<sup>-1</sup>.

**[α]<sub>D</sub><sup>24</sup>** = 12.6 (c = 1.0, CHCl<sub>3</sub>).

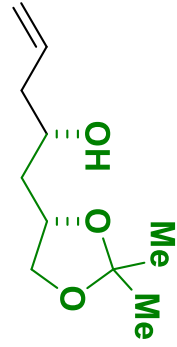

$^1\text{H}$  (500 MHz,  $\text{C}_6\text{D}_6$ )

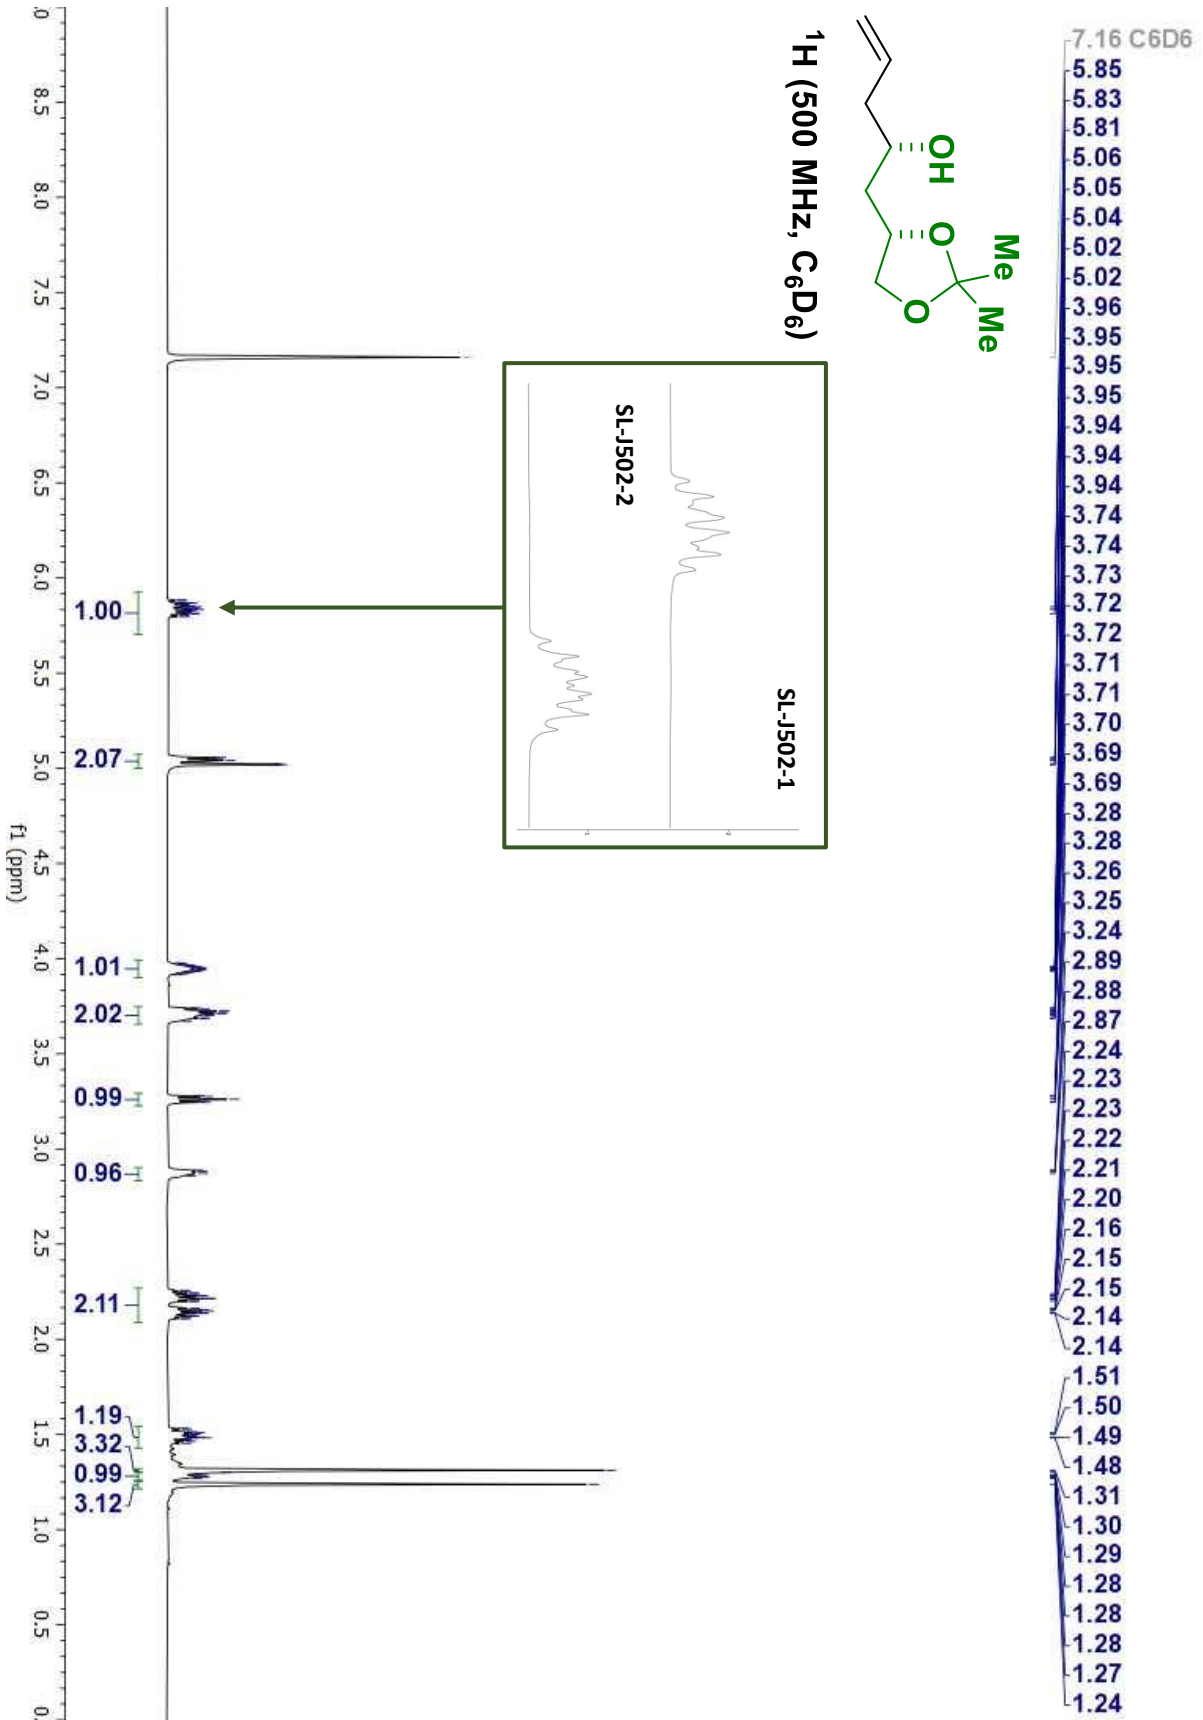



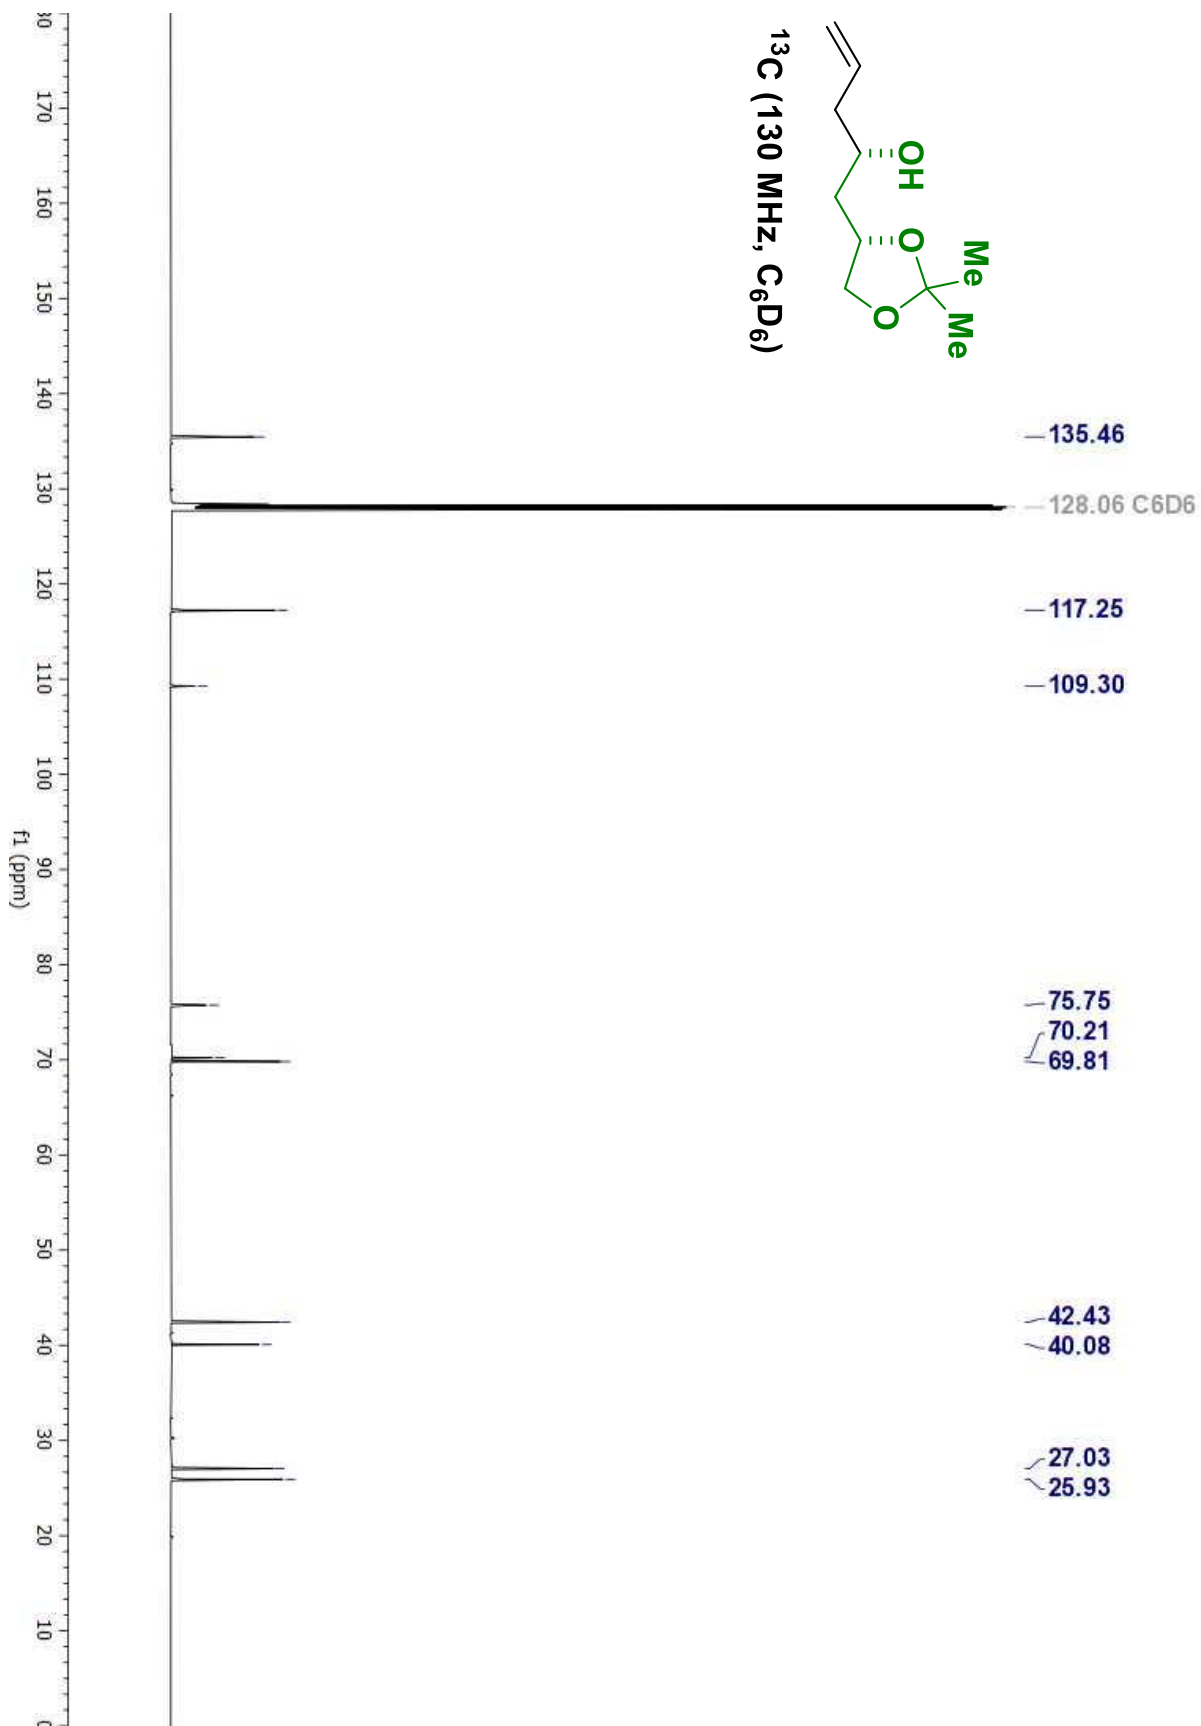

**(R)-1-((S)-2,2-dimethyl-1,3-dioxolan-4-yl)pent-4-en-2-ol (*epi*-3j)**

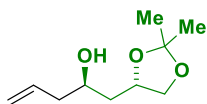

Alcohol **2j** (29.2 mg, 0.2 mmol) was subjected to standard reaction conditions with **SL-J502-2** as ligand (110 °C, 48 h). Upon flash column chromatography (SiO<sub>2</sub>: 1:99 EtOAc:hexanes) the title compound ***epi*-3j** was isolated as a yellow oil in 95% yield (35.4 mg, 0.19 mmol, >20:1 dr).

**TLC (SiO<sub>2</sub>):** R<sub>f</sub> = 0.5 (1:8 EtOAc:hexanes)

**<sup>1</sup>H NMR** (500 MHz, C<sub>6</sub>D<sub>6</sub>): δ 5.75 – 5.62 (m, 1H), 5.01 – 4.95 (m, 2H), 4.20 (ddd, J = 12.8, 7.5, 5.3 Hz, 1H), 3.87 (dd, J = 8.1, 6.0 Hz, 1H), 3.71 (dp, J = 9.2, 3.9 Hz, 1H), 3.41 (t, J = 7.8 Hz, 1H), 2.08 – 1.99 (m, 3H), 1.55 (ddd, J = 14.0, 7.5, 2.7 Hz, 1H), 1.45 – 1.37 (m, 4H), 1.32 (s, 3H).

**<sup>13</sup>C NMR** (130 MHz, C<sub>6</sub>D<sub>6</sub>): δ 135.2, 117.6, 108.7, 74.0, 69.9, 68.1, 42.9, 40.3, 27.2, 26.0.

**HRMS** (Na<sup>+</sup>, *m/z*): for C<sub>10</sub>H<sub>18</sub>O<sub>3</sub> : calcd. = 209.1148; found = 209.1147.

**FTIR** (neat): 2984, 2935, 1774, 1370, 1215, 1157, 1057, 996, 915, 862 cm<sup>-1</sup>.

**[α]<sub>D</sub><sup>24</sup>** = 8.4 (c = 1.5, CHCl<sub>3</sub>).

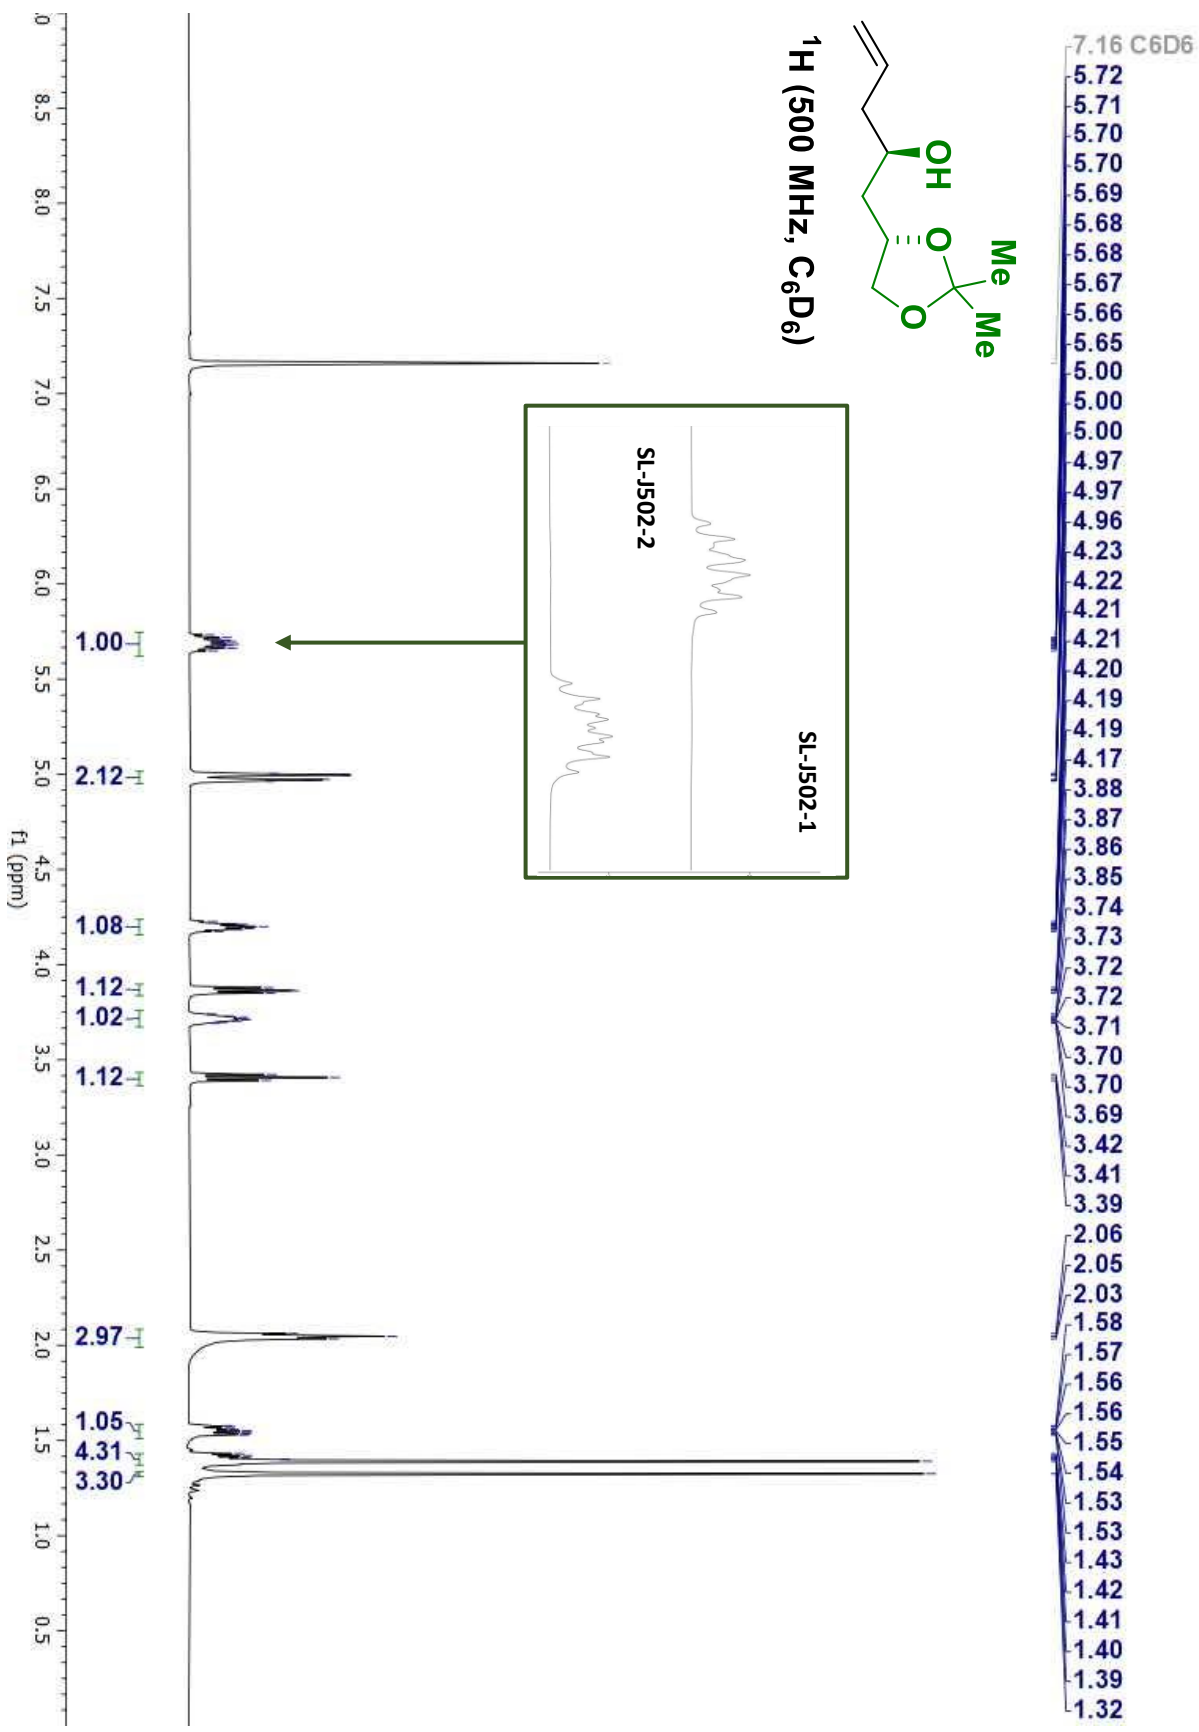

$^{13}\text{C}$  (130 MHz,  $\text{C}_6\text{D}_6$ )

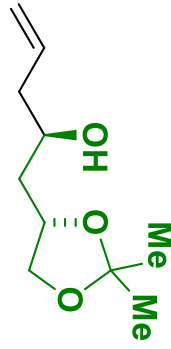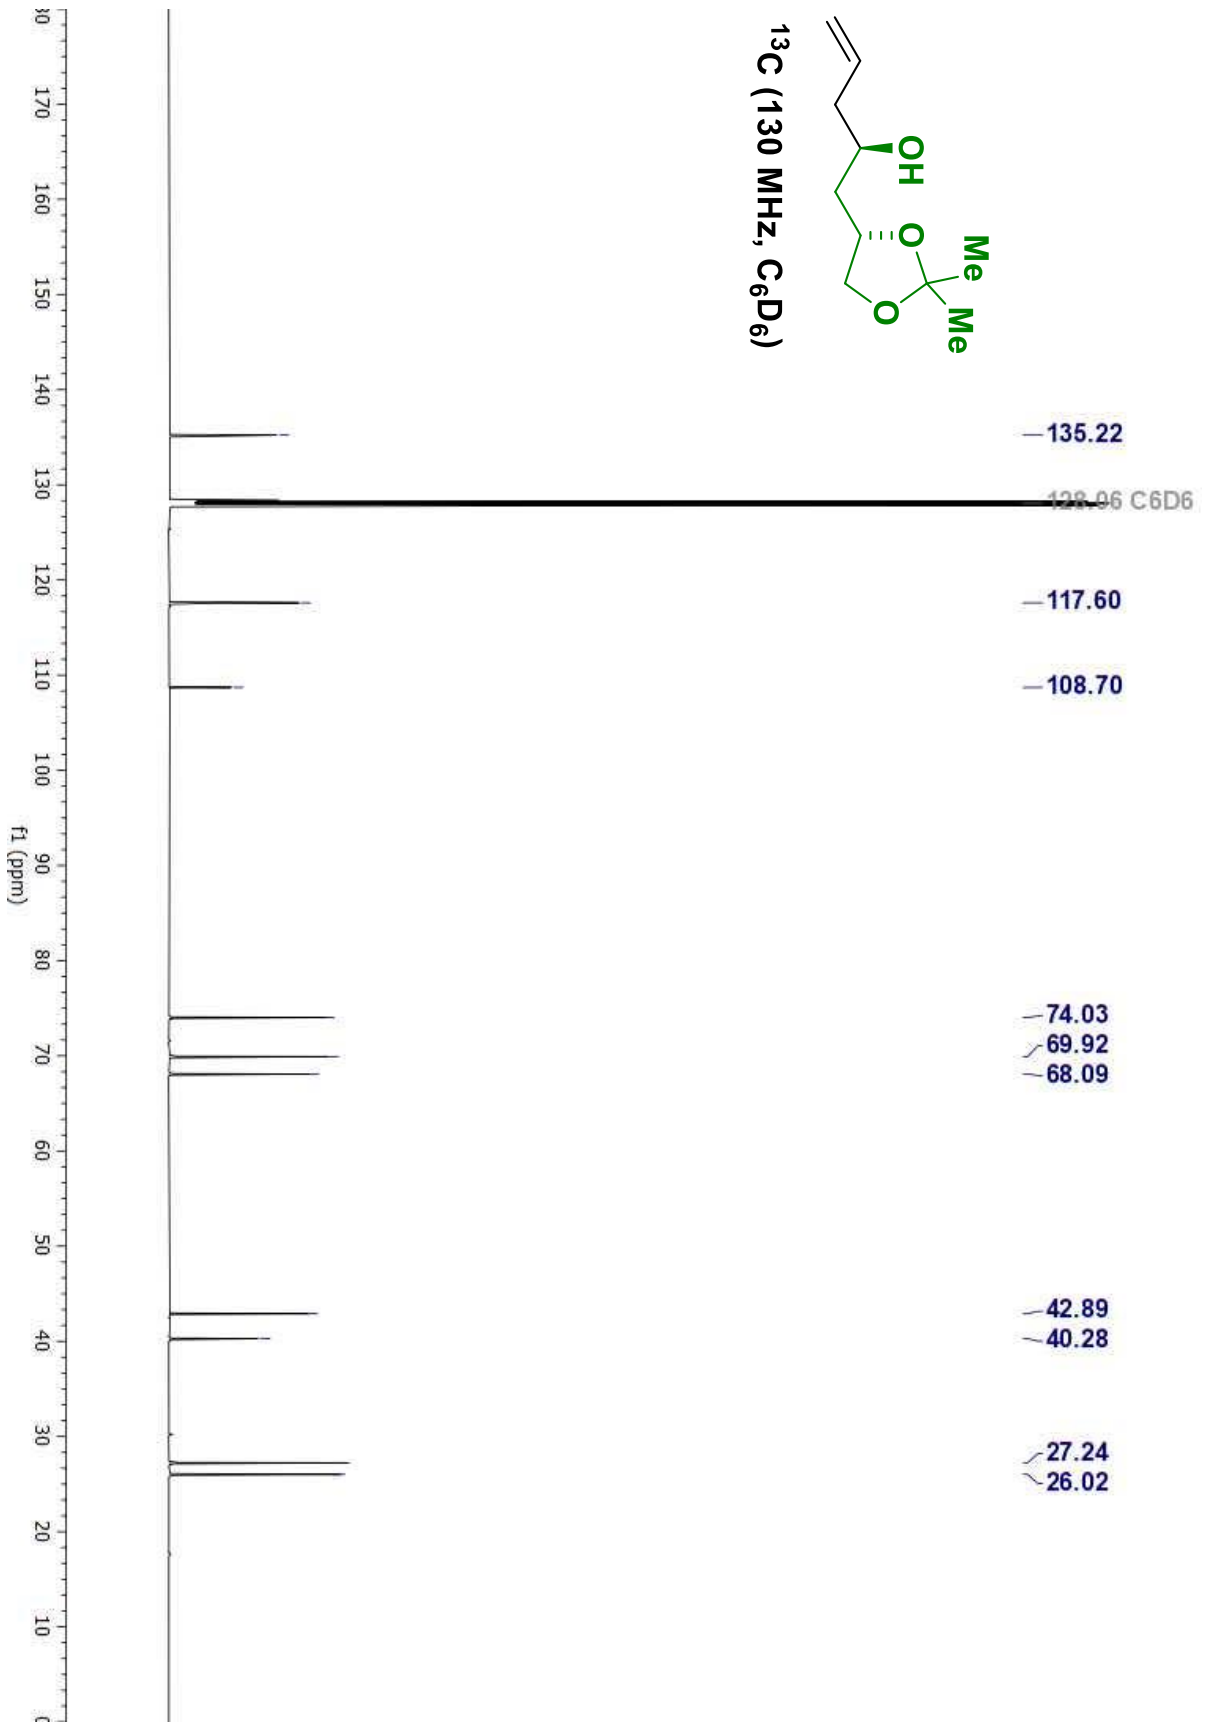

**(2S,3S)-1-(benzyloxy)-2-methylhex-5-en-3-ol (3k)**

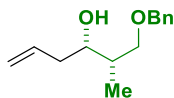

Alcohol **2k** (36.0 mg, 0.2 mmol) was subjected to standard reaction conditions with **SL-J502-1** as ligand (110 °C, 48 h). Upon flash column chromatography (SiO<sub>2</sub>: 2:98 EtOAc:hexanes) the title compound **3k** was isolated as a yellow oil in 85% yield (37.5 mg, 0.17 mmol, 5:1 dr).

**TLC (SiO<sub>2</sub>):** R<sub>f</sub> = 0.5 (1:8 EtOAc:hexanes)

**<sup>1</sup>H NMR** (500 MHz, C<sub>6</sub>D<sub>6</sub>): δ 7.23 (d, J = 7.5 Hz, 2H), 7.14 (s, 2H), 7.10 – 7.05 (m, 1H), 5.79 (ddt, J = 17.1, 10.1, 7.1 Hz, 1H), 5.06 – 4.98 (m, 2H), 4.23 (s, 2H), 3.77 (dq, J = 8.4, 4.0 Hz, 1H), 3.32 (dd, J = 8.9, 6.3 Hz, 1H), 3.24 (dd, J = 8.9, 5.0 Hz, 1H), 2.21 (dddd, J = 14.0, 8.4, 7.0, 1.4 Hz, 1H), 2.12 – 2.02 (m, 2H), 1.83 – 1.66 (m, 1H), 0.95 – 0.90 (m, 3H).

**<sup>13</sup>C NMR** (130 MHz, C<sub>6</sub>D<sub>6</sub>): δ 139.0, 136.2, 128.6, 128.4, 127.8, 116.9, 74.4, 73.4, 72.5, 39.7, 38.1, 10.9.

**HRMS** (Na<sup>+</sup>, *m/z*): for C<sub>14</sub>H<sub>20</sub>O<sub>2</sub>: calcd. = 243.1360; found = 243.1366.

**FTIR** (neat): 3449, 2921, 2857, 1640, 1454, 1363, 1094, 913, 740, 698 cm<sup>-1</sup>.

**[α]<sub>D</sub><sup>24</sup>** = 8.5 (c = 1.5, CHCl<sub>3</sub>).

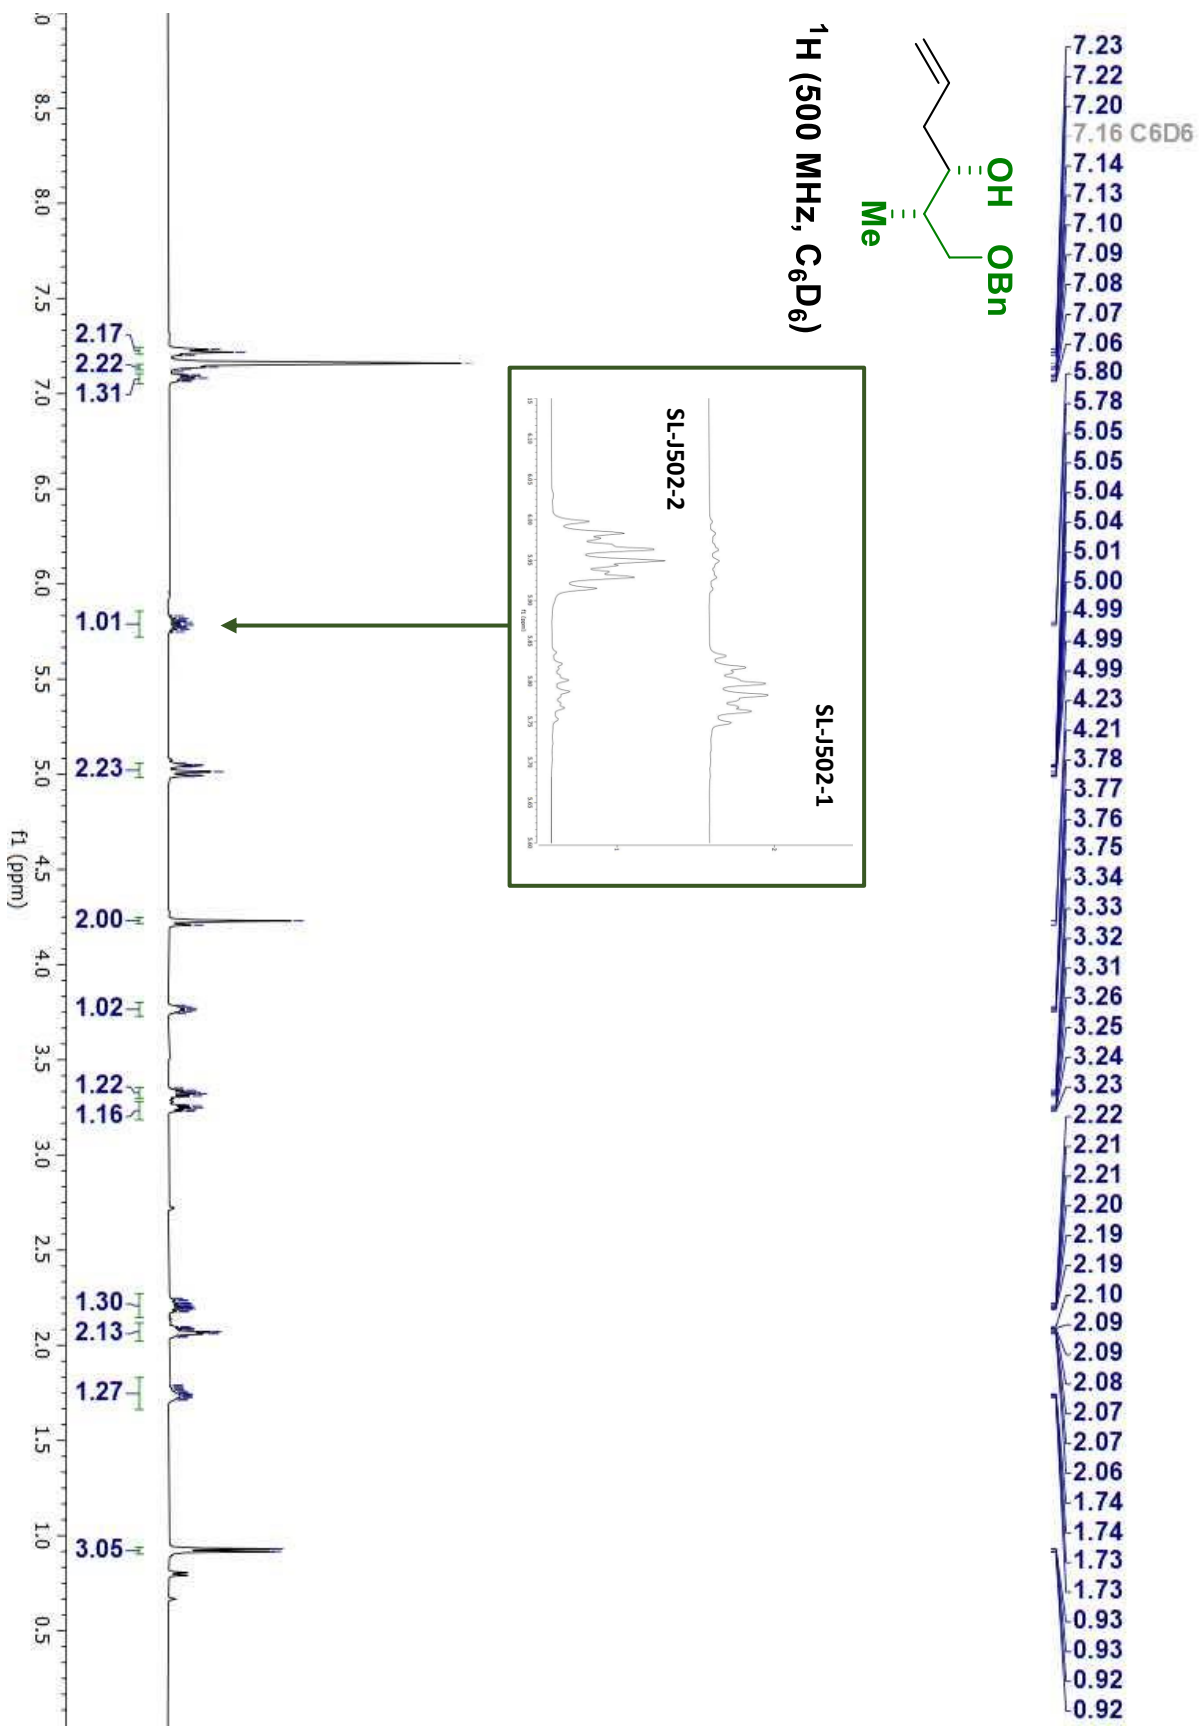

$^{13}\text{C}$  (130 MHz,  $\text{C}_6\text{D}_6$ )

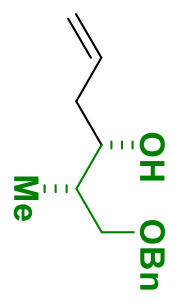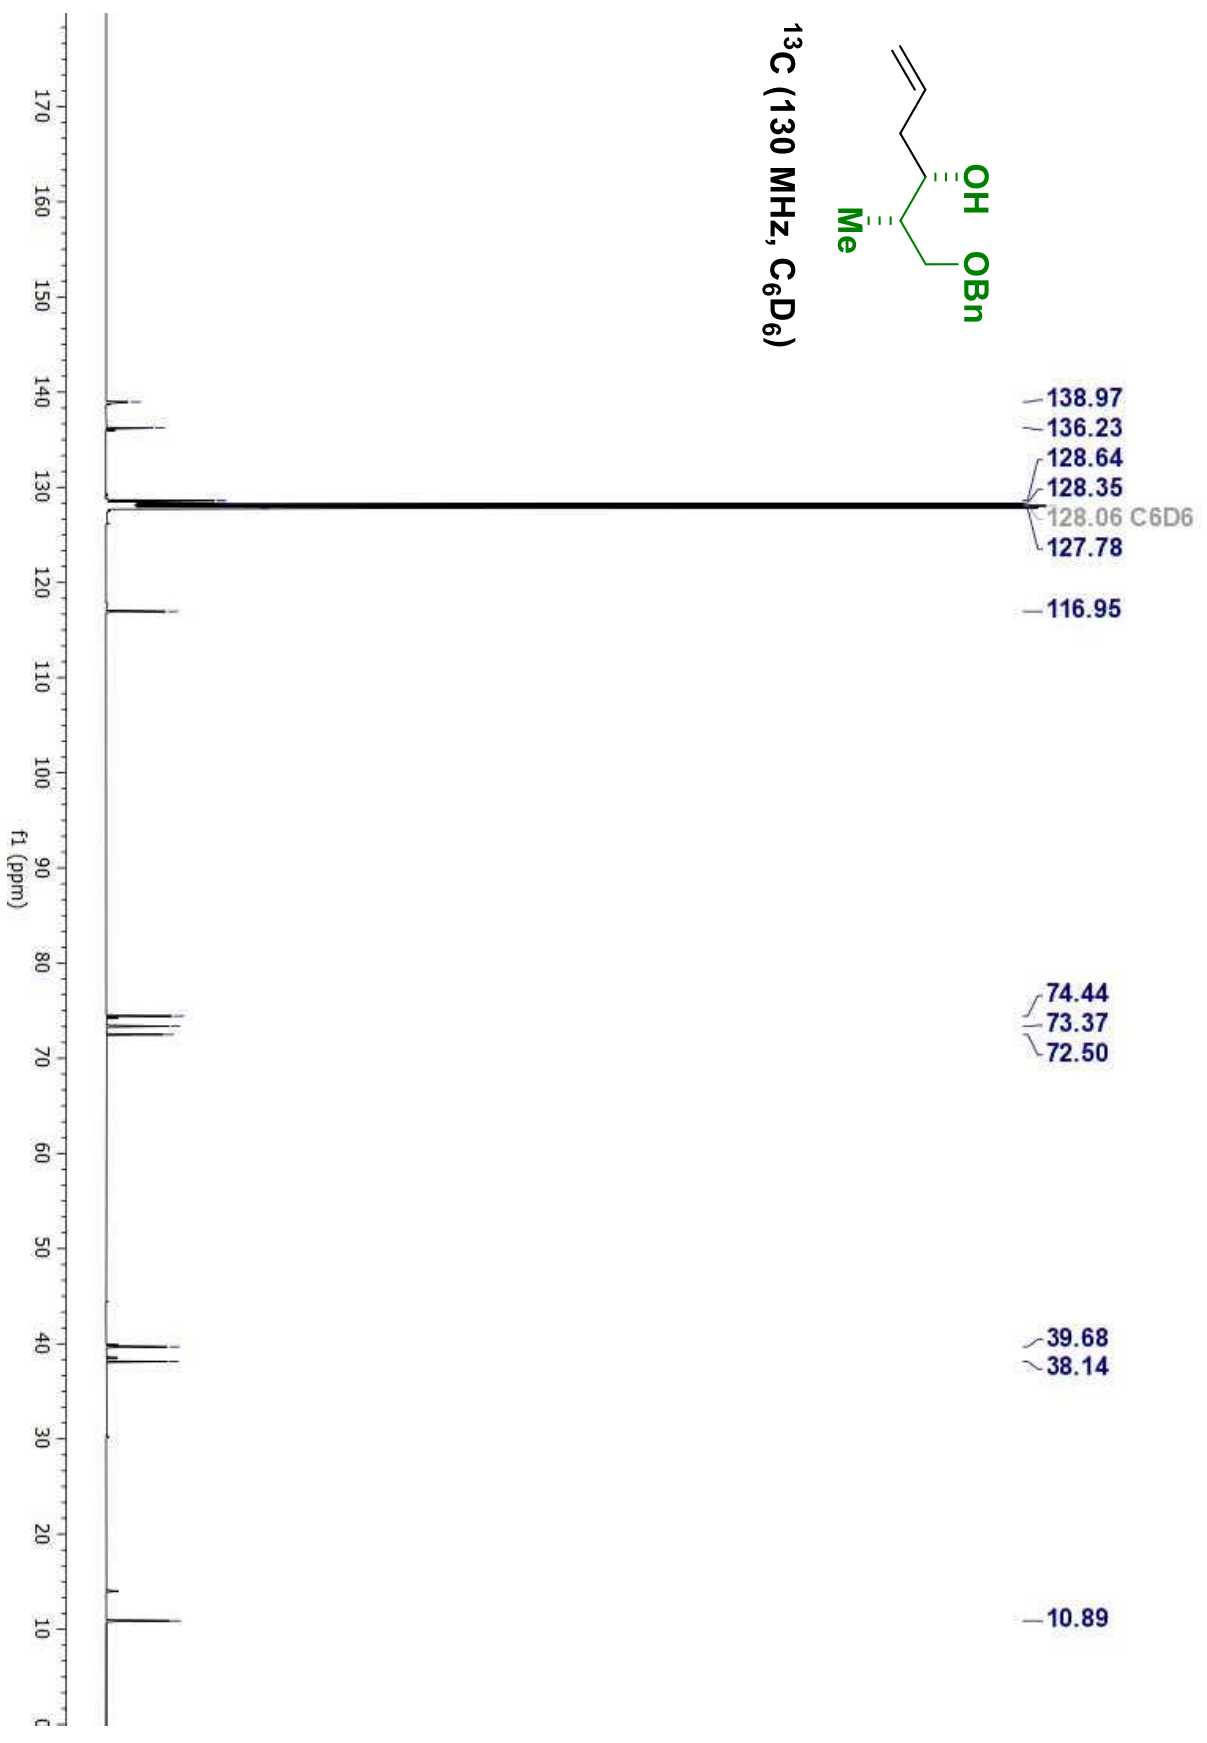

**(2S,3R)-1-(benzyloxy)-2-methylhex-5-en-3-ol (*epi*-3k)**

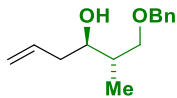

Alcohol **2k** (36.0 mg, 0.2 mmol) was subjected to standard reaction conditions with **SL-J502-2** as ligand (110 °C, 48 h). Upon flash column chromatography (SiO<sub>2</sub>: 2:98 EtOAc:hexanes) the title compound ***epi*-3k** was isolated as a yellow oil in 95% yield (41.9 mg, 0.19 mmol, 7:1 dr).

**TLC (SiO<sub>2</sub>):** R<sub>f</sub> = 0.5 (1:8 EtOAc:hexanes)

**<sup>1</sup>H NMR** (500 MHz, C<sub>6</sub>D<sub>6</sub>): δ 7.21 (d, J = 7.5 Hz, 2H), 7.14 (d, J = 7.6 Hz, 2H), 7.08 (dd, J = 8.6, 6.2 Hz, 1H), 5.96 (ddt, J = 17.2, 10.4, 7.1 Hz, 1H), 5.07 (dd, J = 9.5, 2.4 Hz, 1H), 5.05 – 5.03 (m, 1H), 4.21 (s, 2H), 3.52 (tt, J = 7.5, 3.5 Hz, 1H), 3.37 – 3.23 (m, 2H), 2.77 (d, J = 3.7 Hz, 1H), 2.25 (ddt, J = 15.2, 5.3, 2.3 Hz, 1H), 2.13 (dt, J = 14.3, 7.5 Hz, 1H), 1.78 (qd, J = 7.0, 5.1 Hz, 1H), 0.80 (d, J = 7.0 Hz, 3H).

**<sup>13</sup>C NMR** (130 MHz, C<sub>6</sub>D<sub>6</sub>): δ 138.8, 136.0, 128.6, 128.4, 127.8, 117.0, 74.5, 74.3, 73.4, 39.9, 38.5, 14.0.

**HRMS** (Na<sup>+</sup>, *m/z*): for C<sub>14</sub>H<sub>20</sub>O<sub>2</sub>: calcd. = 243.1360; found = 243.1366.

**FTIR** (neat): 3449, 2921, 2857, 1640, 1454, 1363, 1094, 913, 740, 698 cm<sup>-1</sup>.

**[α]<sub>D</sub><sup>24</sup>** = -13.5 (c = 1.5, CHCl<sub>3</sub>).



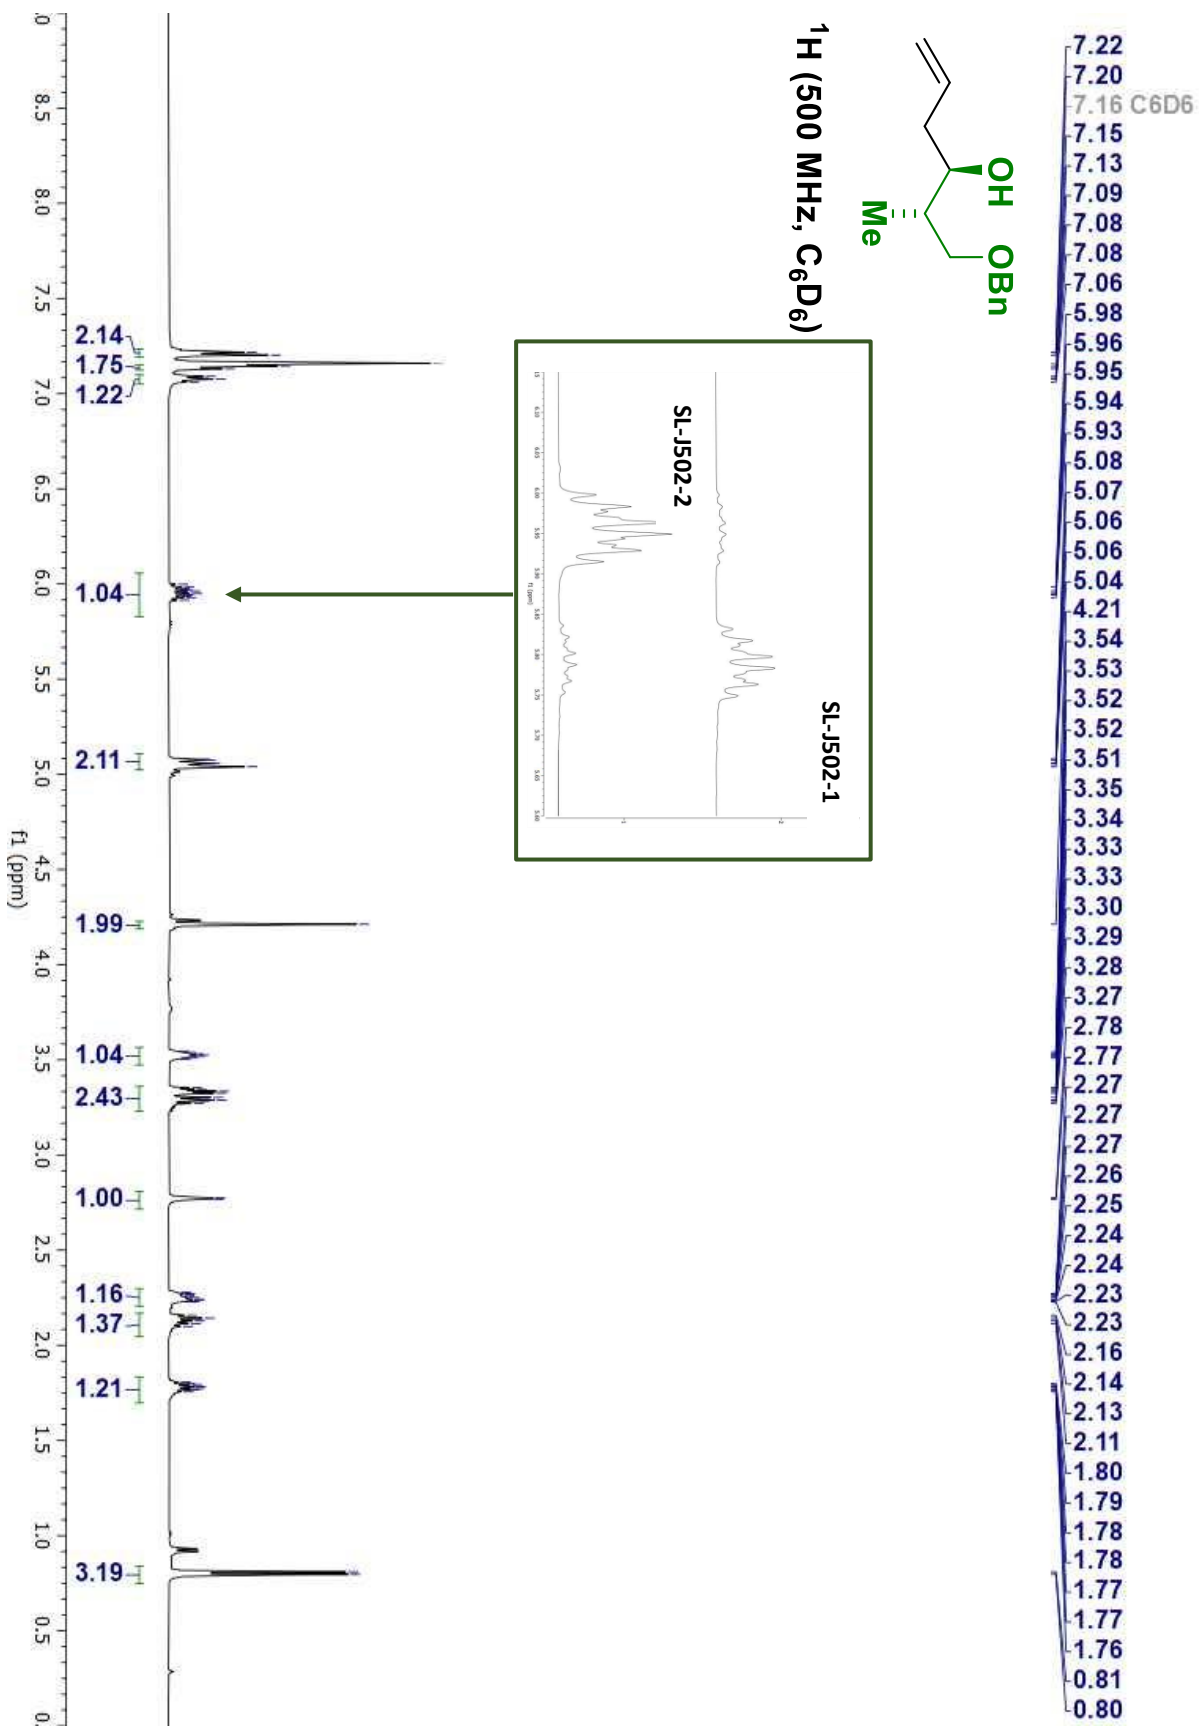

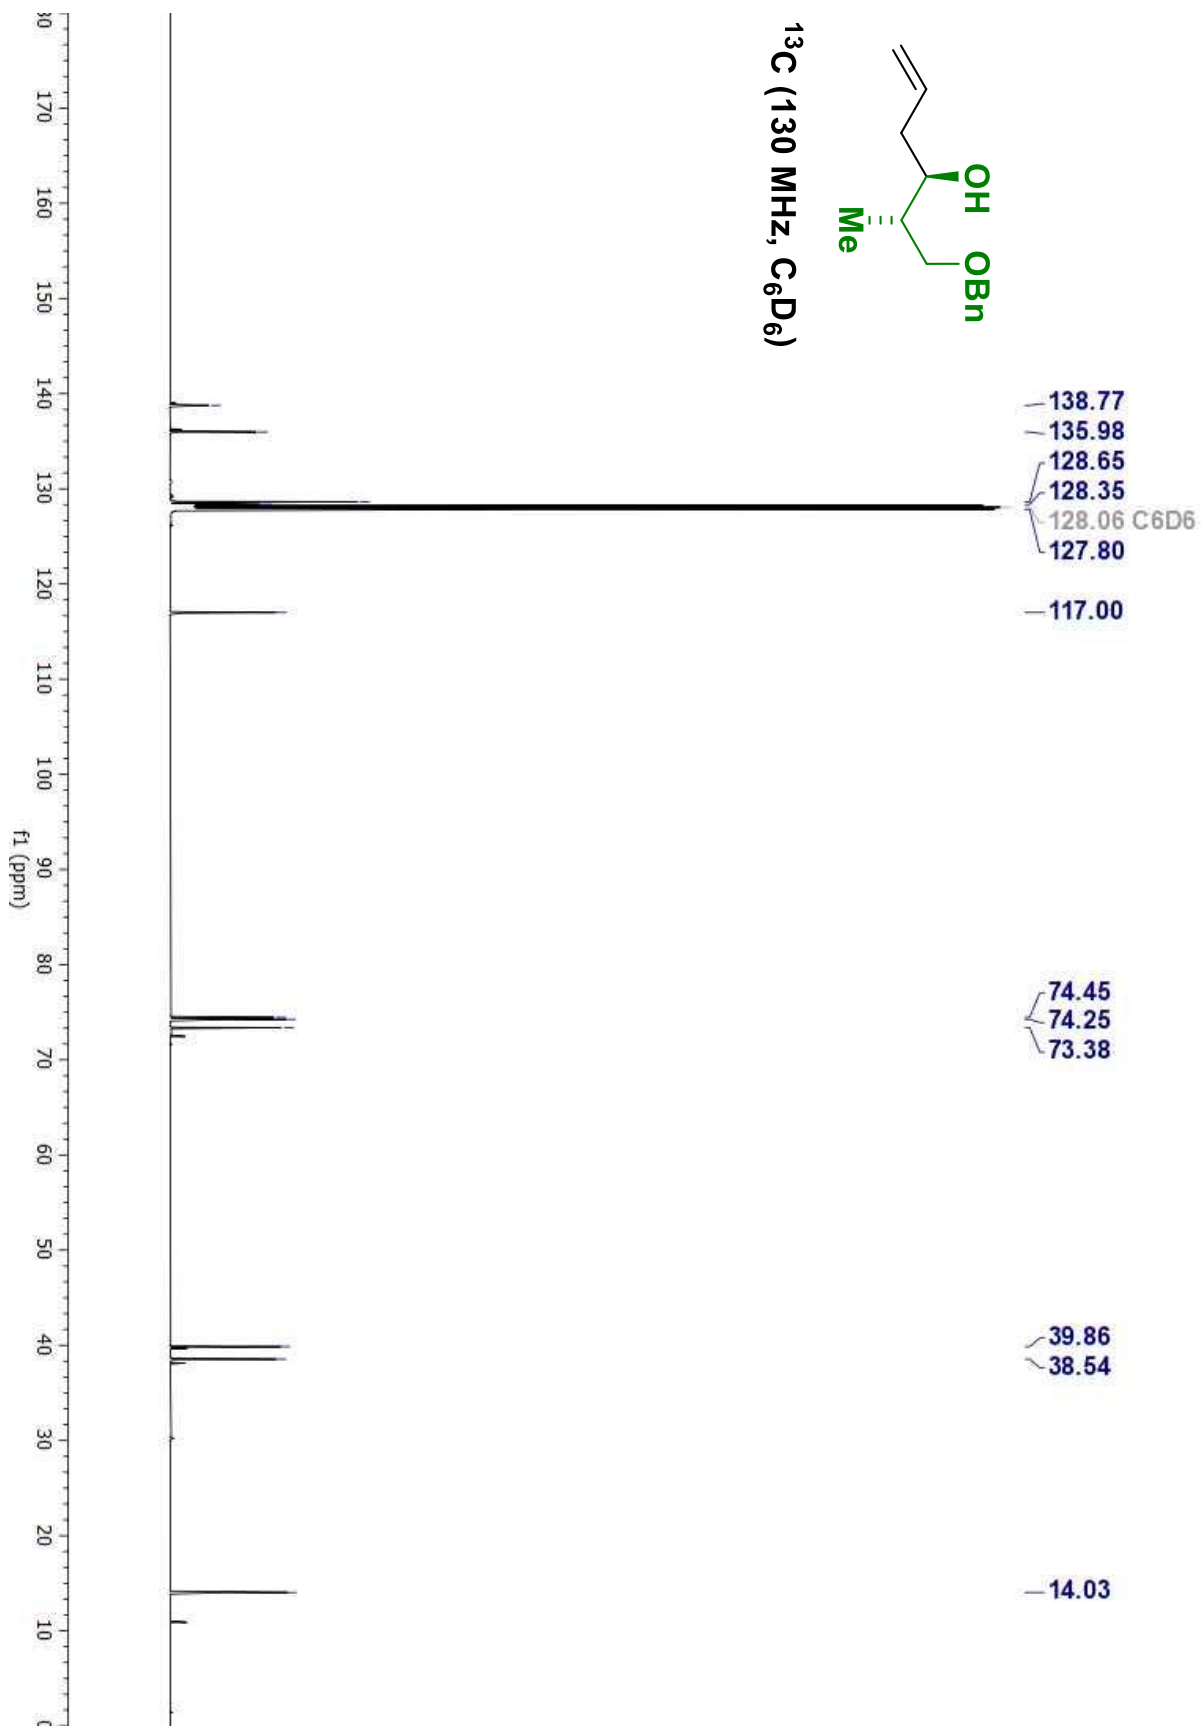

**(4S,6S)-6,10-dimethylundeca-1,9-dien-4-ol (3i)**

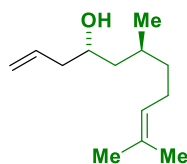

Alcohol **2i** (31.3 mg, 0.2 mmol) was subjected to standard reaction conditions with **SL-J502-1** as ligand (110 °C, 48 h). Upon flash column chromatography (SiO<sub>2</sub>: 2:98 EtOAc:hexanes) the title compound **3i** was isolated as a yellow oil in 88% yield (34.5 mg, 0.18 mmol, 15:1 dr).

**TLC (SiO<sub>2</sub>):** R<sub>f</sub> = 0.5 (1:9 EtOAc:hexanes)

**<sup>1</sup>H NMR** (500 MHz, C<sub>6</sub>D<sub>6</sub>): δ 5.80 – 5.64 (m, 1H), 5.27 – 5.18 (m, 1H), 5.07 – 4.94 (m, 2H), 3.66 – 3.48 (m, 1H), 2.10 – 1.97 (m, 4H), 1.78 (dddd, J = 13.6, 10.5, 6.6, 4.0 Hz, 1H), 1.71 – 1.65 (m, 3H), 1.58 (s, 3H), 1.44 (ddd, J = 13.8, 9.7, 4.1 Hz, 1H), 1.38 – 1.21 (m, 3H), 1.11 – 1.01 (m, 1H), 0.90 (d, J = 6.7 Hz, 3H).

**<sup>13</sup>C NMR** (130 MHz, C<sub>6</sub>D<sub>6</sub>): δ 135.6, 131.0, 125.5, 117.5, 68.4, 44.6, 43.5, 38.4, 29.2, 26.0, 25.9, 19.4, 17.8.

**HRMS** (H<sup>+</sup>, *m/z*): for C<sub>13</sub>H<sub>24</sub>O: calcd. = 197.1237; found = 197.1237.

**FTIR** (neat): 2981, 2960, 1475, 1285, 1086, 1346, 738, 693 cm<sup>-1</sup>.

[α]<sub>D</sub><sup>24</sup> = -1.8 (c = 0.1, CHCl<sub>3</sub>).

$^1\text{H}$  (500 MHz,  $\text{C}_6\text{D}_6$ )

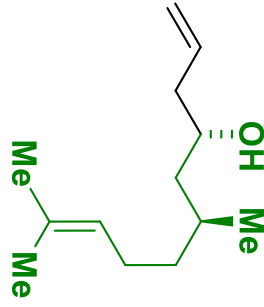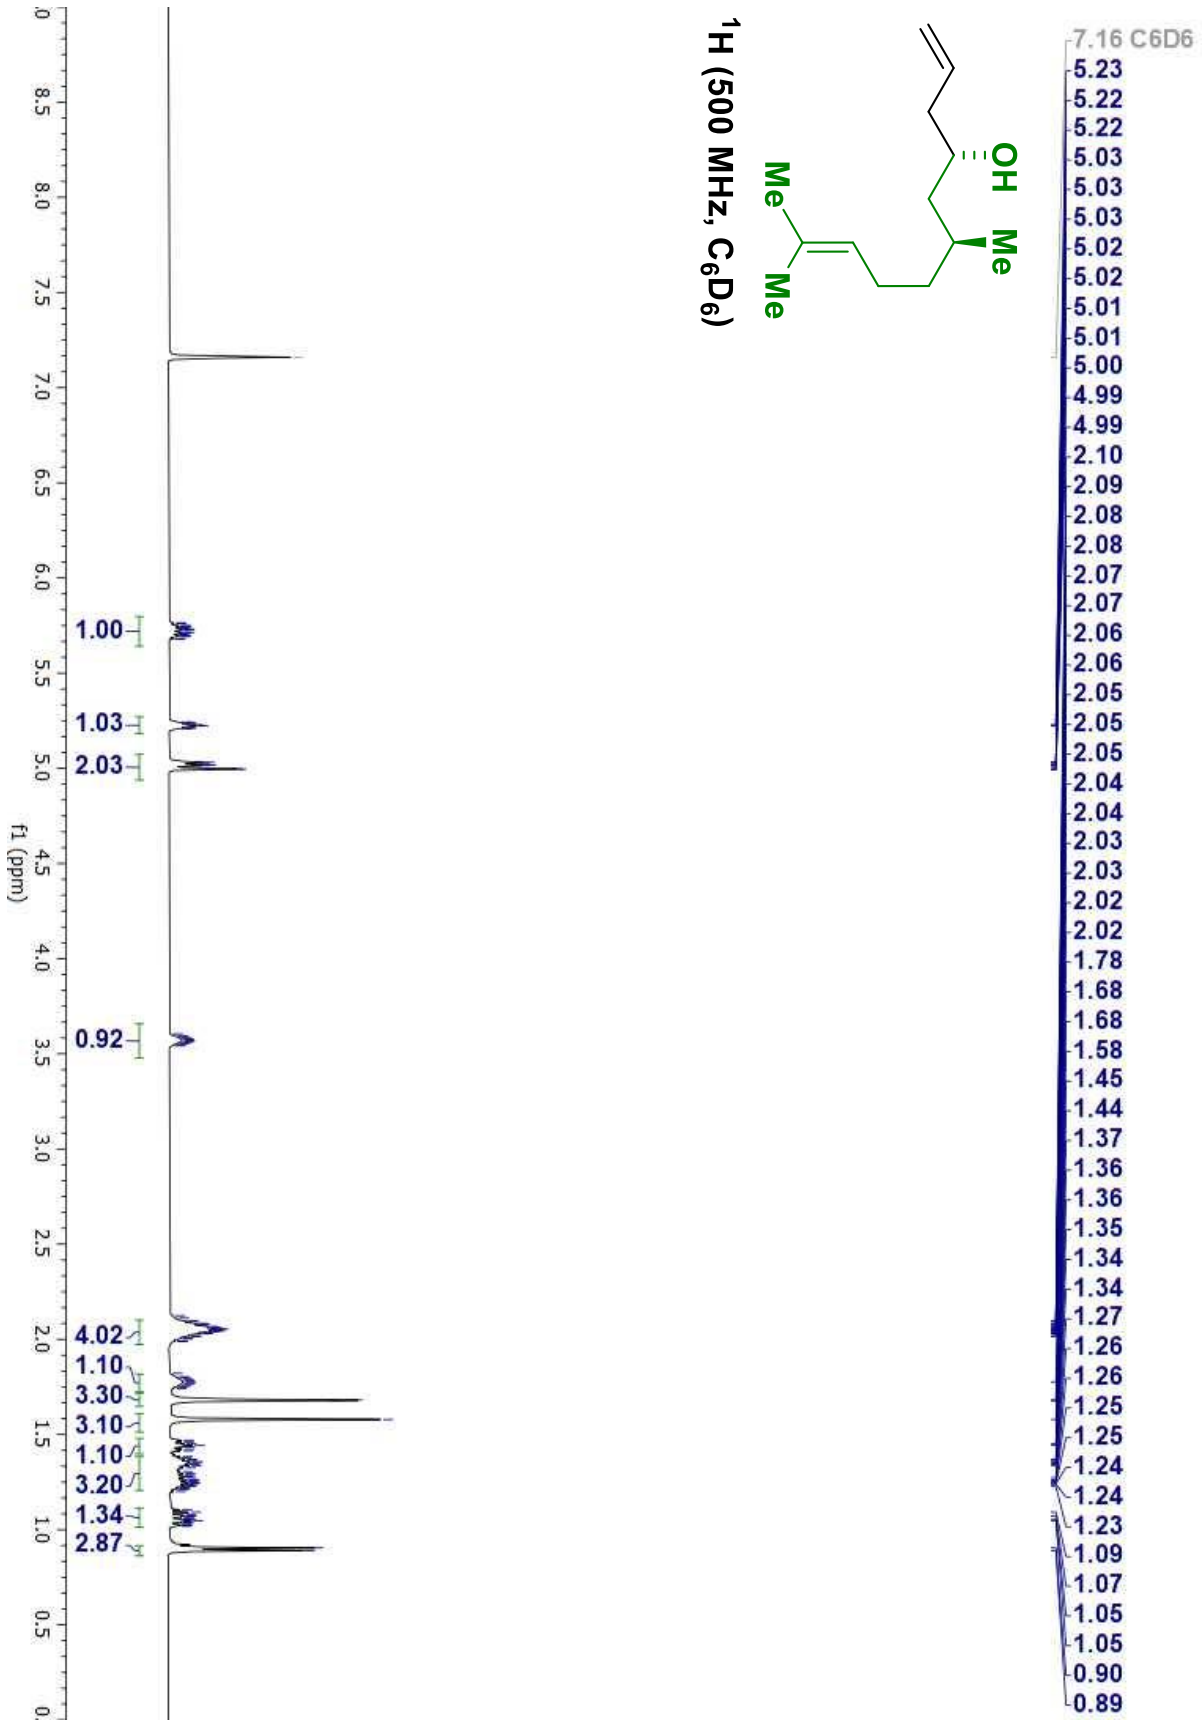

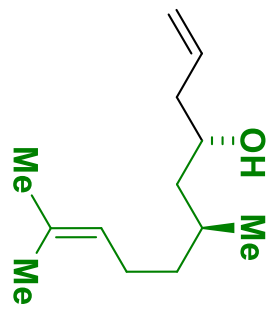

$^{13}\text{C}$  (130 MHz,  $\text{C}_6\text{D}_6$ )

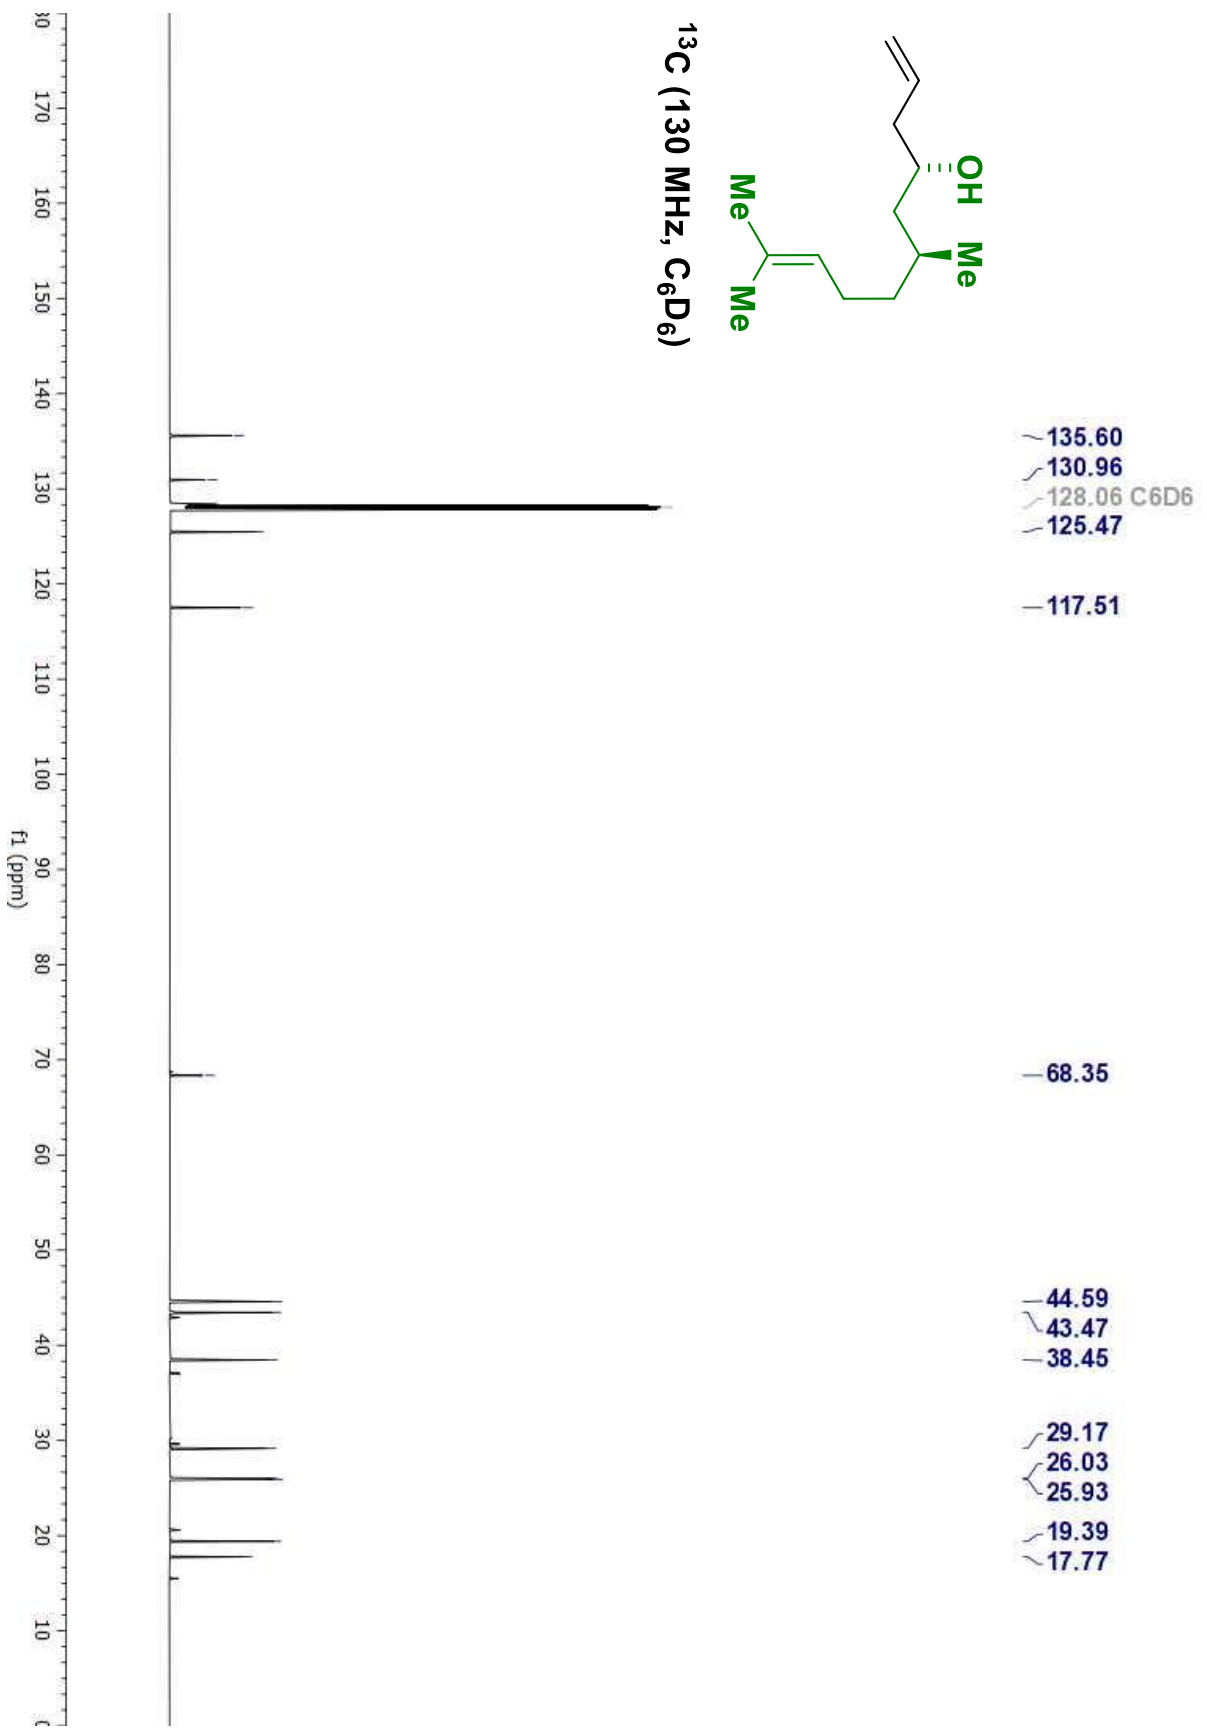

**(4R,6S)-6,10-dimethylundeca-1,9-dien-4-ol (*epi-3I*)**

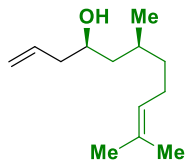

Alcohol **2I** (31.3 mg, 0.2 mmol) was subjected to standard reaction conditions (110 °C, 48 h. Upon flash column chromatography (SiO<sub>2</sub>: 2:98 EtOAc:hexanes) the title compound ***epi-3I*** was isolated as a yellow oil in 94% yield (36.9 mg, 0.19 mmol, >20:1 dr).

**TLC (SiO<sub>2</sub>):** R<sub>f</sub> = 0.5 (1:9 EtOAc:hexanes)

**<sup>1</sup>H NMR** (500 MHz, C<sub>6</sub>D<sub>6</sub>): δ 5.77 – 5.65 (m, 1H), 5.26 – 5.19 (m, 1H), 5.05 – 4.97 (m, 2H), 3.57 (p, J = 6.7 Hz, 1H), 2.12 – 1.94 (m, 4H), 1.71 – 1.63 (m, 4H), 1.58 (s, 3H), 1.51 – 1.42 (m, 1H), 1.29 (t, J = 7.0 Hz, 2H), 1.19 – 1.09 (m, 2H), 0.91 (d, J = 6.7 Hz, 3H).

**<sup>13</sup>C NMR** (130 MHz, C<sub>6</sub>D<sub>6</sub>): δ 135.5, 131.0, 125.5, 117.6, 68.7, 44.7, 42.9, 37.0, 29.6, 25.9, 25.9, 20.6, 17.8.

**HRMS** (H<sup>+</sup>, *m/z*): for C<sub>13</sub>H<sub>24</sub>O: calcd. = 197.1237; found = 197.1237.

**FTIR** (neat): 2981, 2960, 1475, 1285, 1086, 1346, 738, 693 cm<sup>-1</sup>.

**[α]<sub>D</sub><sup>24</sup>** = -24.5 (c = 1.1, CHCl<sub>3</sub>).

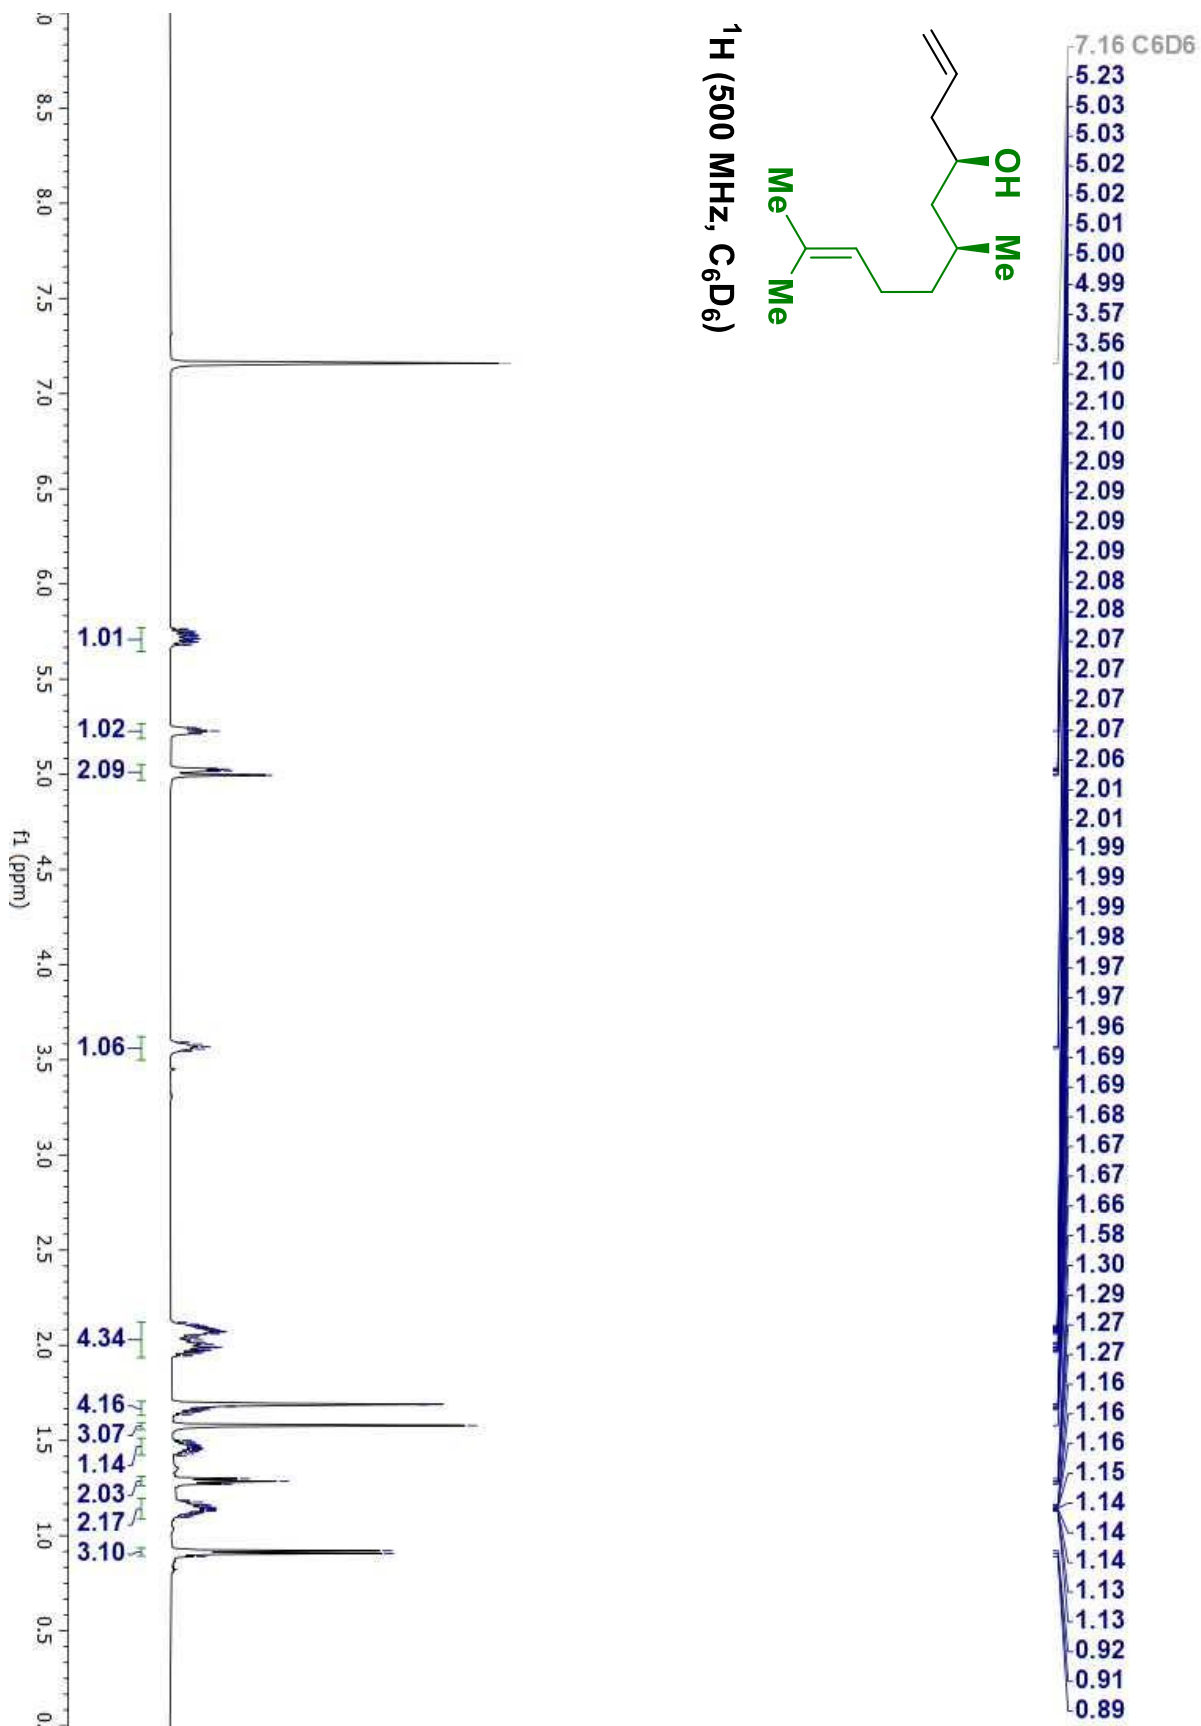

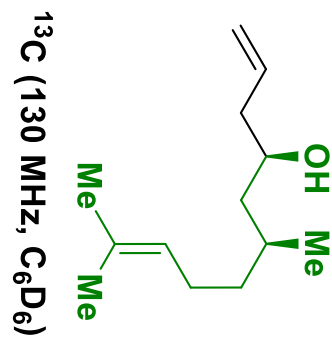

- 135.52
- 130.97
- 128.06 C<sub>6</sub>D<sub>6</sub>
- 125.50
- 117.60

68.73

- 44.73
- 42.93
- 37.03
- 29.62
- 25.92
- 25.90
- 20.58
- 17.76

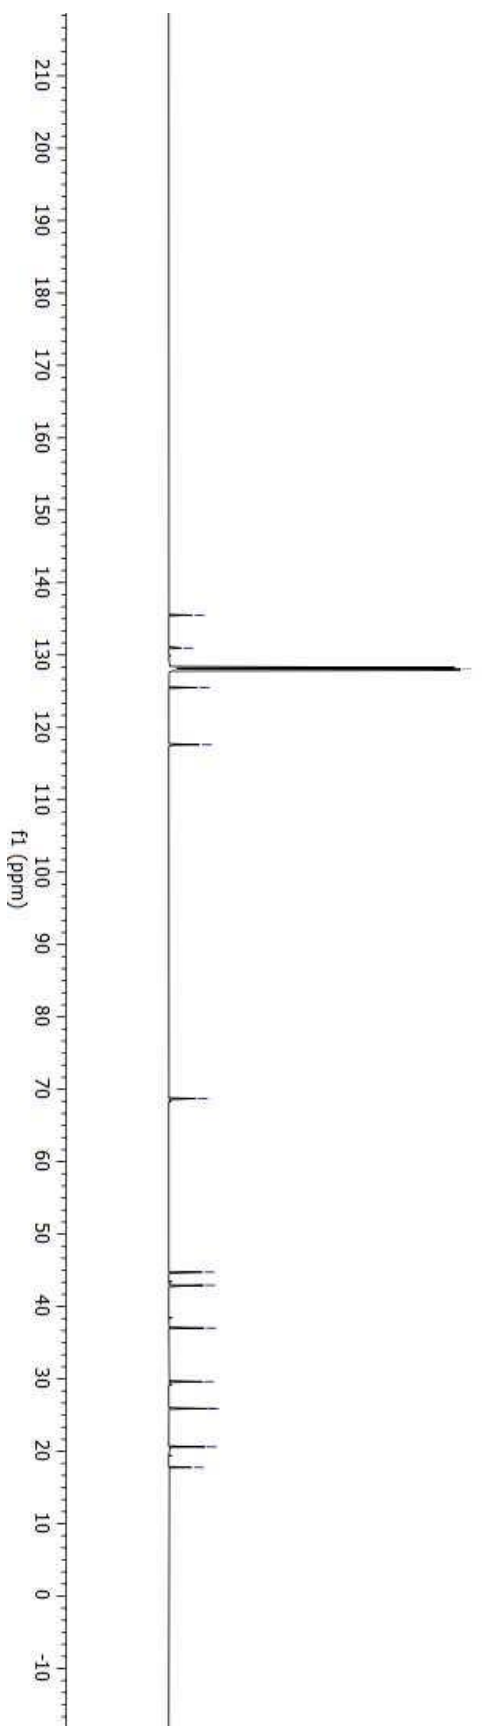



**(S)-1-((1S,5R)-6,6-dimethylbicyclo[3.1.1]hept-2-en-2-yl)but-3-en-1-ol (3m)**

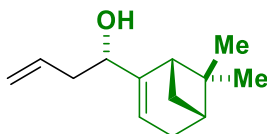

Alcohol **2m** (30.5 mg, 0.2 mmol) was subjected to standard reaction conditions with **SL-J502-1** as ligand (110 °C, 48 h). Upon flash column chromatography (SiO<sub>2</sub>: 1:99 EtOAc:hexanes) the title compound **3m** was isolated as a brown-yellow oil in 84% yield (32.3 mg, 0.17 mmol, 5:1 dr).

**TLC (SiO<sub>2</sub>):** R<sub>f</sub> = 0.5 (1:6 EtOAc:Hexanes)

**<sup>1</sup>H NMR** (500 MHz, CDCl<sub>3</sub>): δ 5.79 (ddt, *J* = 17.1, 10.1, 7.1 Hz, 1H), 5.47 (s, 1H), 5.17 – 5.08 (m, 2H), 4.04 (s, 1H), 2.41 (dt, *J* = 8.7, 5.6 Hz, 1H), 2.35 – 2.16 (m, 5H), 2.11 (s, 1H), 1.50 (d, *J* = 3.4 Hz, 1H), 1.30 (s, 3H), 1.15 (d, *J* = 8.8 Hz, 1H), 0.85 (s, 3H).

**<sup>13</sup>C NMR** (101 MHz, CDCl<sub>3</sub>): δ 149.6, 135.1, 118.1, 118.0, 117.9, 117.8, 73.8, 73.8, 42.4, 42.3, 41.2, 39.6, 38.0, 31.9, 31.3, 29.9, 26.3, 21.6.

**HRMS** (-H<sup>+</sup>, *m/z*): for C<sub>13</sub>H<sub>20</sub>O calcd. = 191.1436; found = 191.1441.

**FTIR** (neat): 2987, 1675, 1421, 1265, 896, 734, 704 cm<sup>-1</sup>.

**[α]<sub>D</sub><sup>24</sup>** = -2.9 (c = 0.5, CHCl<sub>3</sub>).

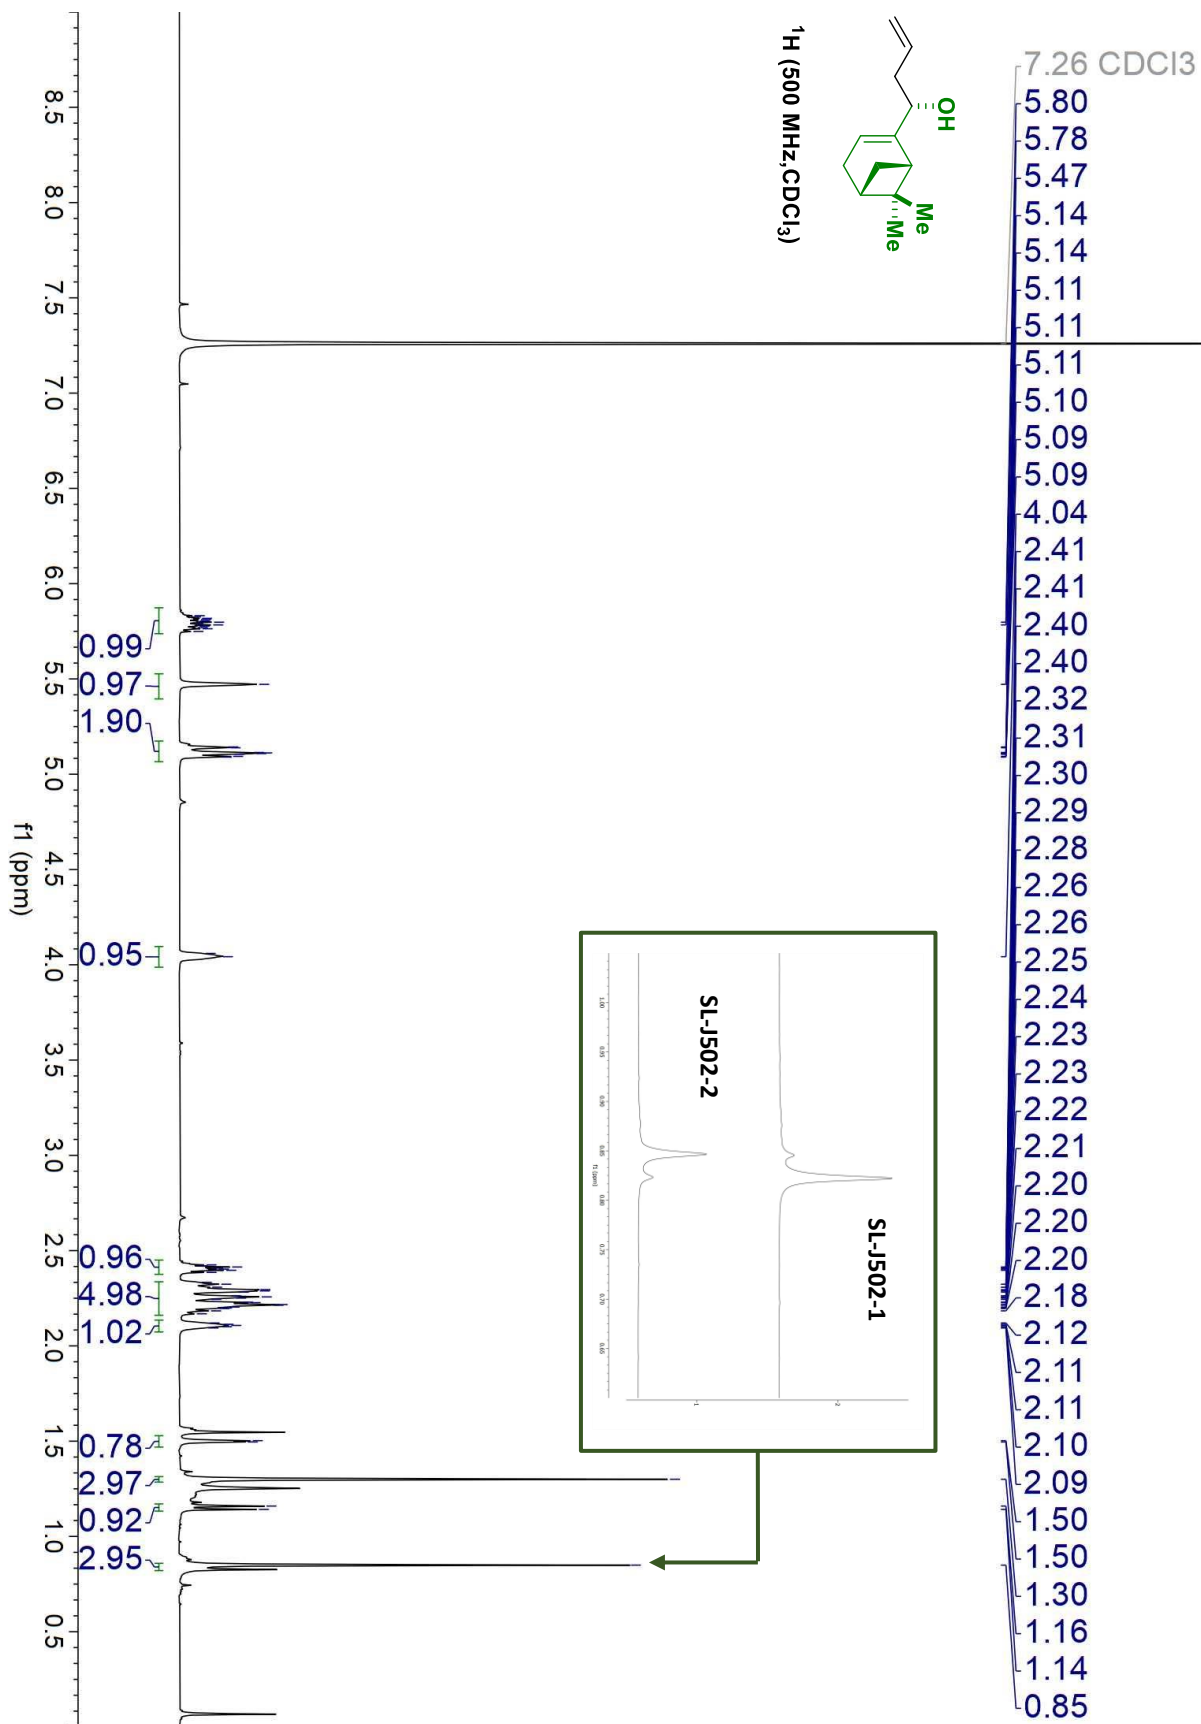

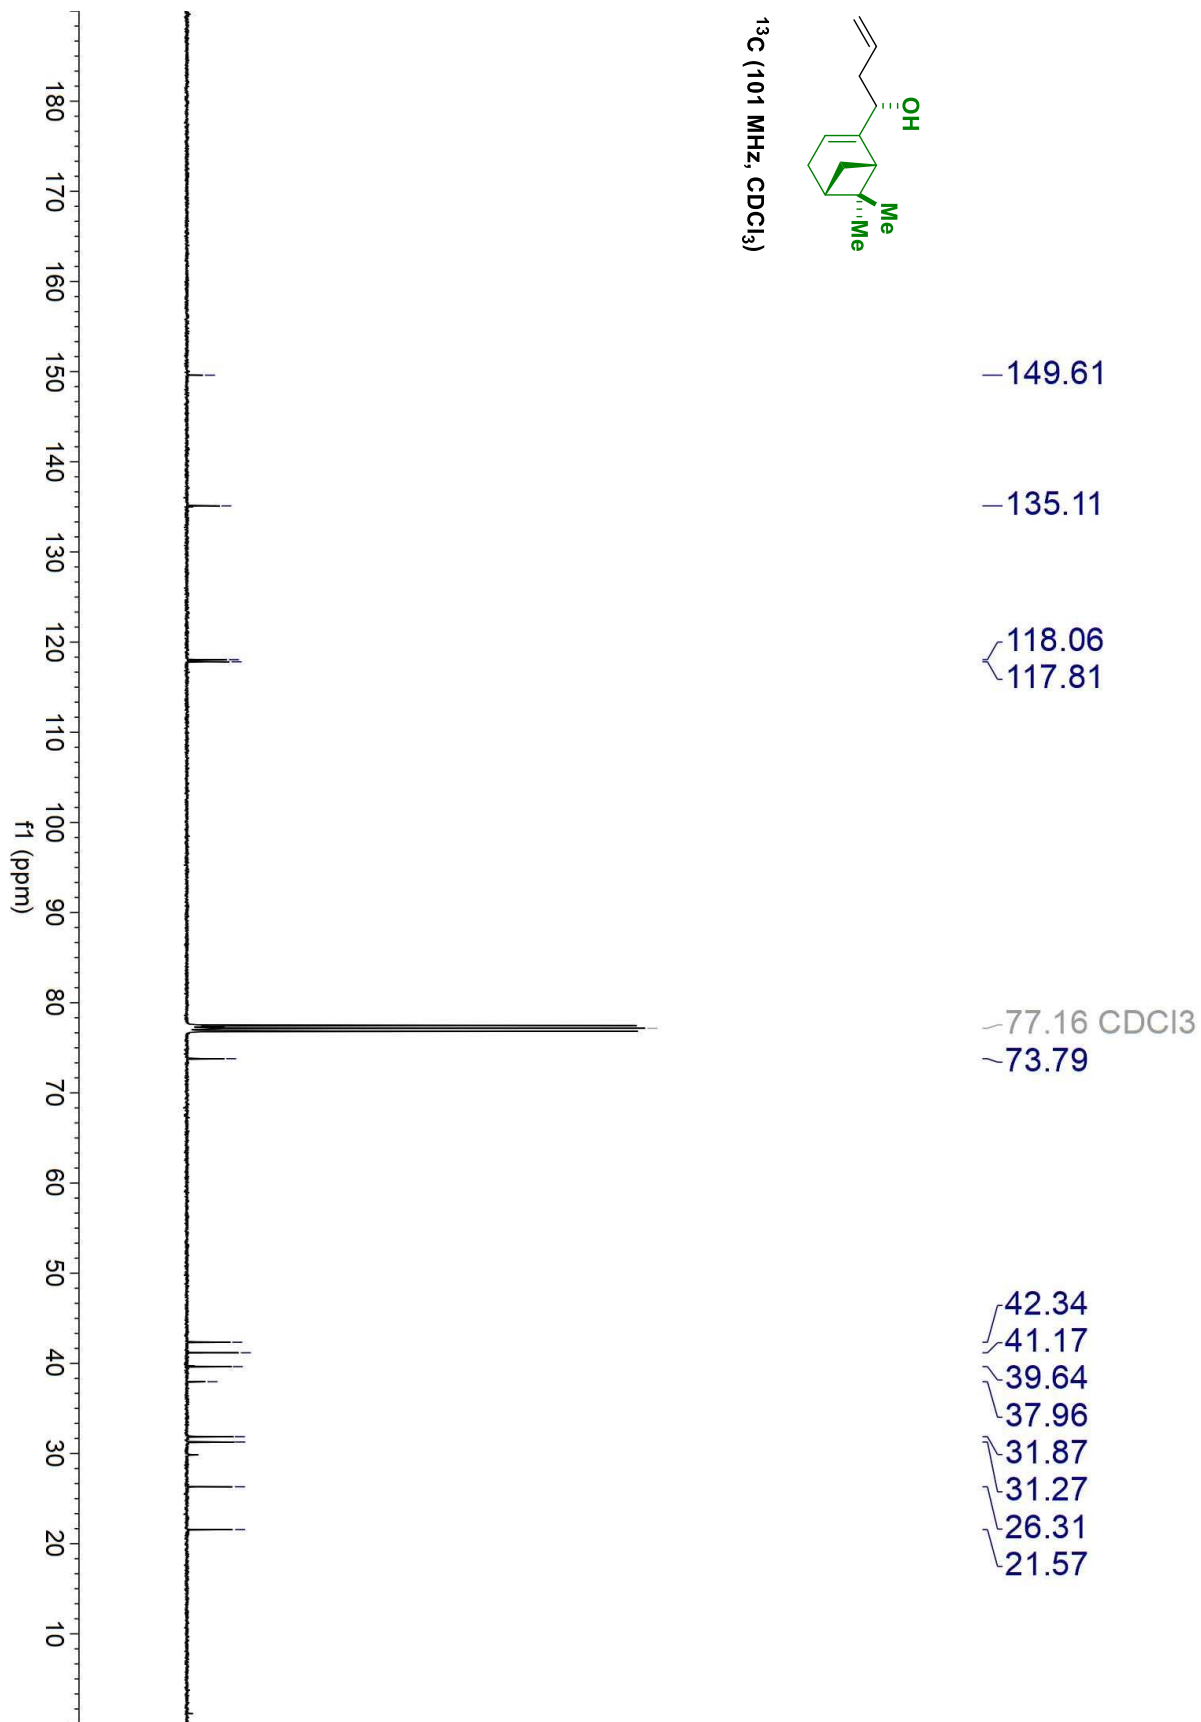

**(R)-1-((1S,5R)-6,6-dimethylbicyclo[3.1.1]hept-2-en-2-yl)but-3-en-1-ol (epi-3m)**

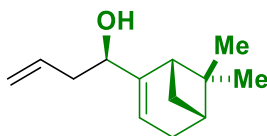

Alcohol **2m** (30.5 mg, 0.2 mmol) was subjected to standard reaction conditions (110 °C, 48 h) with **SL-J502-2** as ligand. Upon flash column chromatography (SiO<sub>2</sub>: 1:99 EtOAc:hexanes) the title compound **epi-3m** was isolated as a brown-yellow oil in 78% yield (30.1 mg, 0.16 mmol, 9:1 dr).

**TLC (SiO<sub>2</sub>):** R<sub>f</sub> = 0.5 (1:6 EtOAc:Hexanes)

**<sup>1</sup>H NMR** (500 MHz, CDCl<sub>3</sub>): δ 5.88 – 5.77 (m, 1H), 5.47 (s, 1H), 5.17 – 5.09 (m, 2H), 4.04 (s, 1H), 2.42 (dt, *J* = 8.7, 5.6 Hz, 1H), 2.35 – 2.16 (m, 5H), 2.13 – 2.07 (m, 1H), 1.56 (d, 1H), 1.30 (s, 3H), 1.17 (d, *J* = 8.7 Hz, 1H), 0.83 (s, 3H).

**<sup>13</sup>C NMR** (101 MHz, CDCl<sub>3</sub>): δ 150.0, 135.0, 118.0, 117.9, 73.8, 42.4, 41.2, 39.7, 38.0, 31.9, 31.3, 26.4, 21.6.

**HRMS** (-H<sup>+</sup>, *m/z*): for C<sub>13</sub>H<sub>20</sub>O calcd. = 191.1436; found = 191.1427.

**FTIR** (neat): 2920, 1676, 1433, 1265, 1000, 735, 704 cm<sup>-1</sup>.

**[α]<sub>D</sub><sup>24</sup>** = -3.0 (c = 0.7, CHCl<sub>3</sub>).

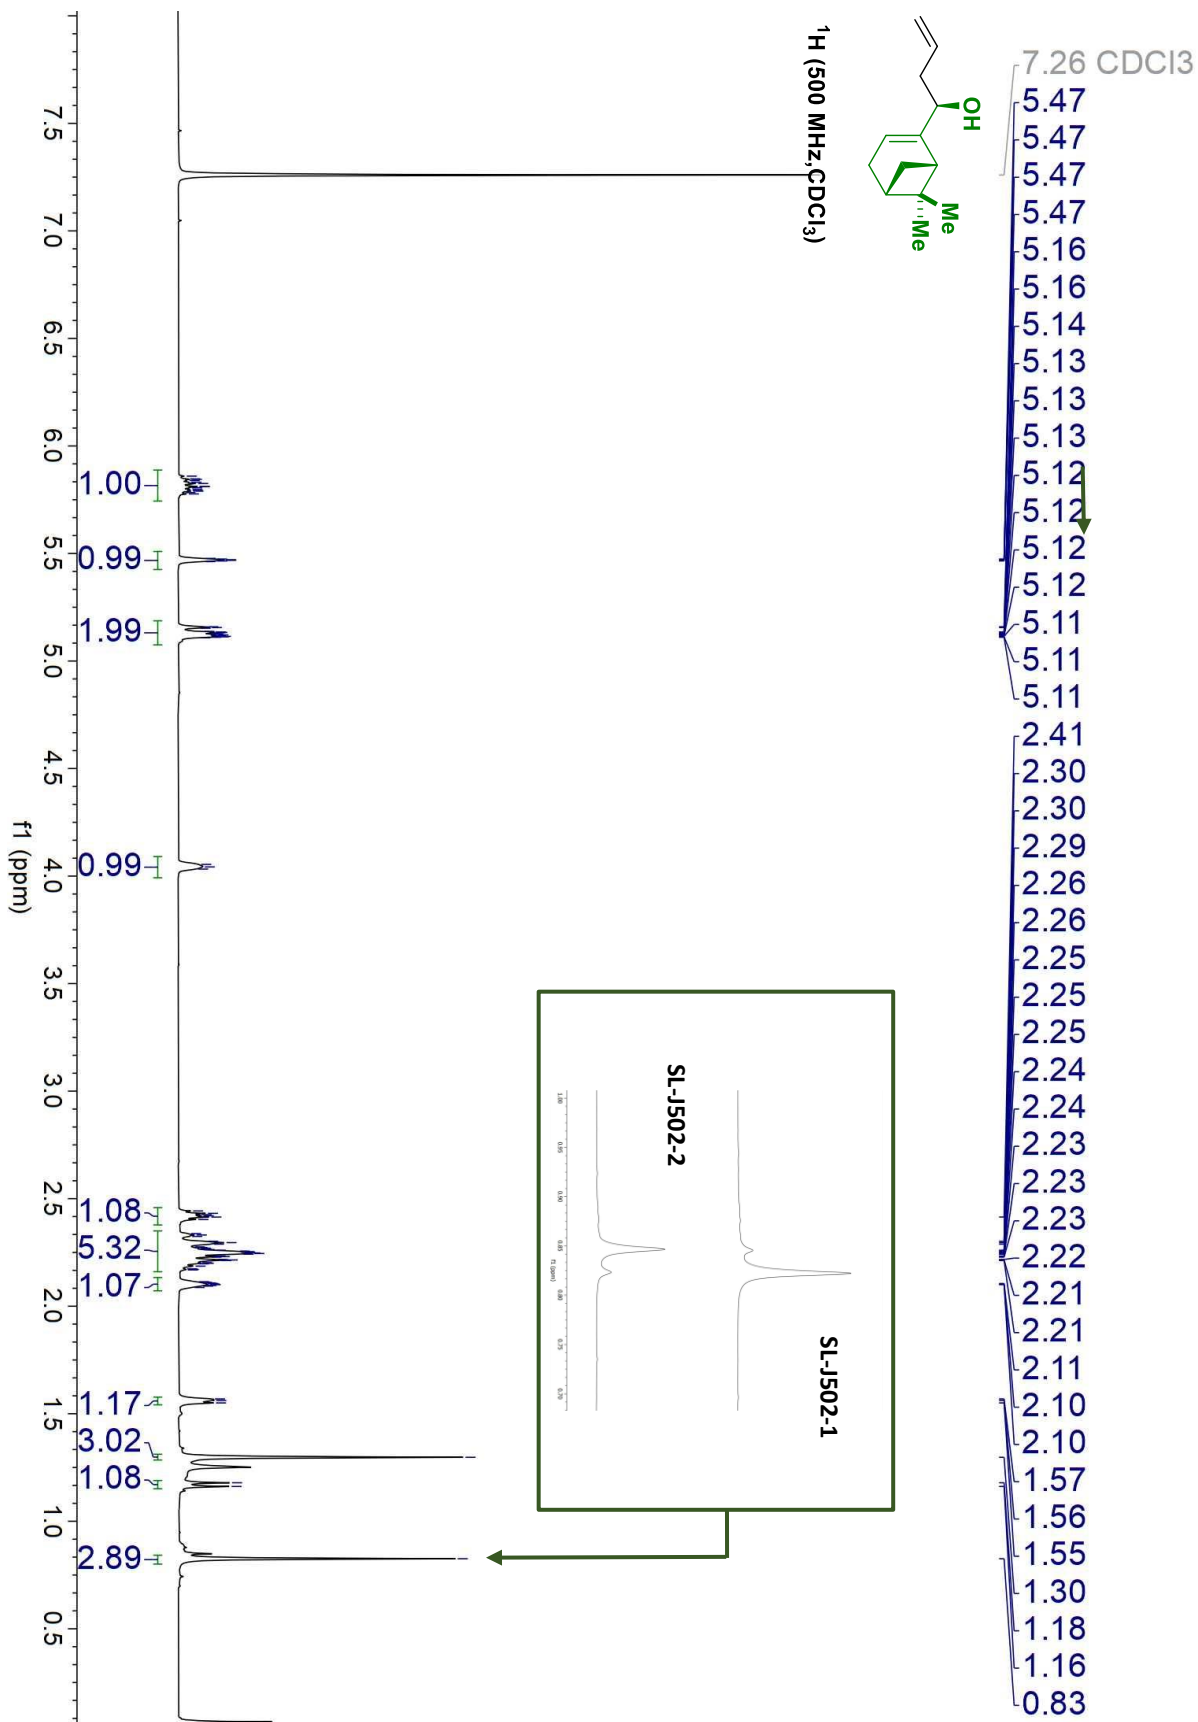

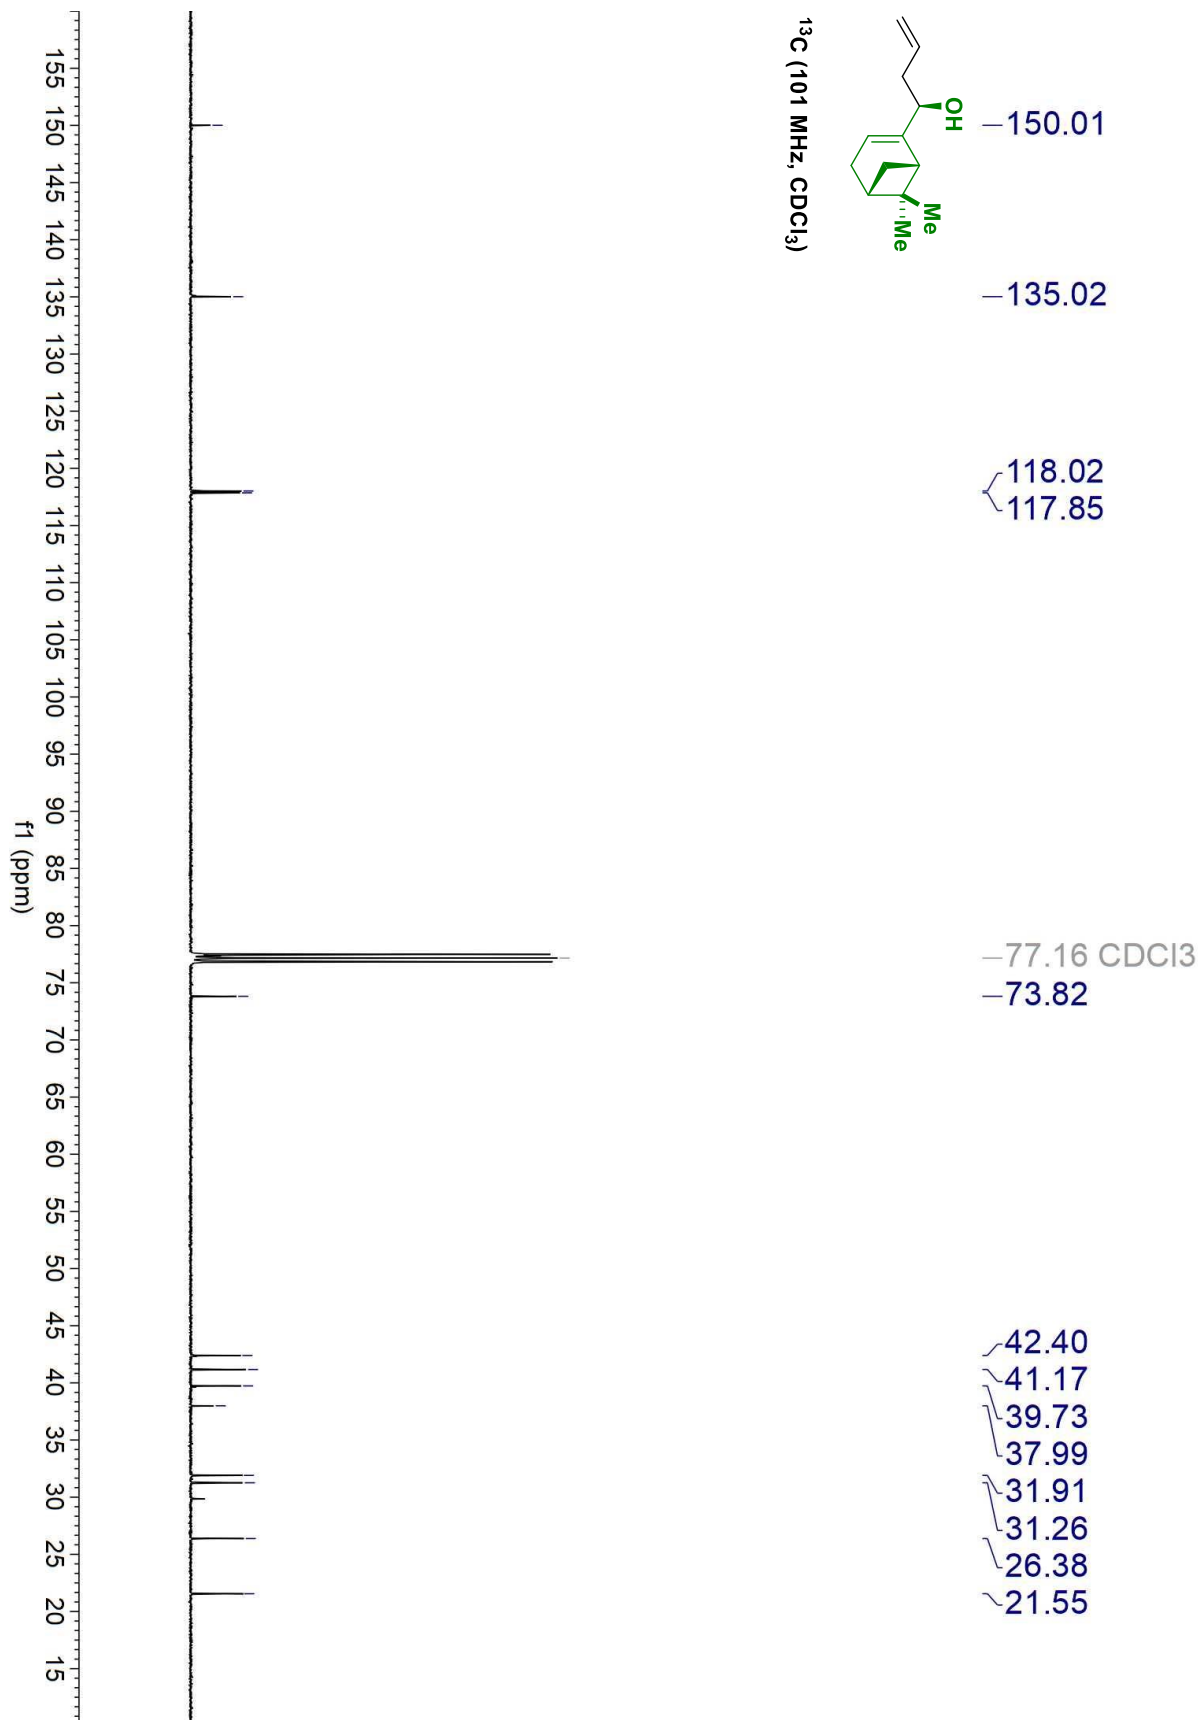

**(3*S*,6*R*,8*S*)-2,6-dimethylundec-10-ene-3,8-diol (3n)**

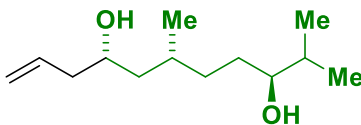

Alcohol **2n** (35.7 mg, 0.2 mmol) was subjected to standard reaction conditions (110 °C, 48 h) with **SL-J502-1** as ligand. Upon flash column chromatography (SiO<sub>2</sub>: 15:85 EtOAc:hexanes) the title compound **3n** was isolated as a yellow oil in 86% yield (36.9 mg, 0.17 mmol, 15:1 dr).

**TLC** (SiO<sub>2</sub>): R<sub>f</sub> = 0.8 (1:1 EtOAc:hexanes)

**<sup>1</sup>H NMR** (400 MHz, C<sub>6</sub>D<sub>6</sub>): δ 5.78 (ddt, *J* = 17.4, 10.4, 7.1 Hz, 1H), 5.25 – 4.86 (m, 2H), 3.73 – 3.59 (m, 1H), 3.17 (ddd, *J* = 8.6, 4.9, 3.4 Hz, 1H), 2.24 – 1.92 (m, 2H), 1.67 (m, 3H), 1.60 – 1.19 (m, 6H), 1.00 (dt, *J* = 10.6, 5.2 Hz, 1H), 0.92 (d, *J* = 6.5 Hz, 3H), 0.89 (d, *J* = 3.8 Hz, 3H), 0.88 (d, *J* = 3.9 Hz, 3H).

**<sup>13</sup>C NMR** (101 MHz, C<sub>6</sub>D<sub>6</sub>): δ 135.6, 117.5, 77.1, 68.6, 44.7, 43.0, 34.0, 33.0, 32.0, 30.2, 20.9, 19.2, 17.2.

**HRMS** (Na<sup>+</sup>, *m/z*): for C<sub>13</sub>H<sub>26</sub>O<sub>2</sub>: calcd. = 237.1825; found = 237.1825.

**FTIR** (neat): 2962, 2890, 1496, 1380, 1200, 1051, 997, 820 cm<sup>-1</sup>.

[α]<sub>D</sub><sup>24</sup> = -4.5 (c = 0.1, CHCl<sub>3</sub>).

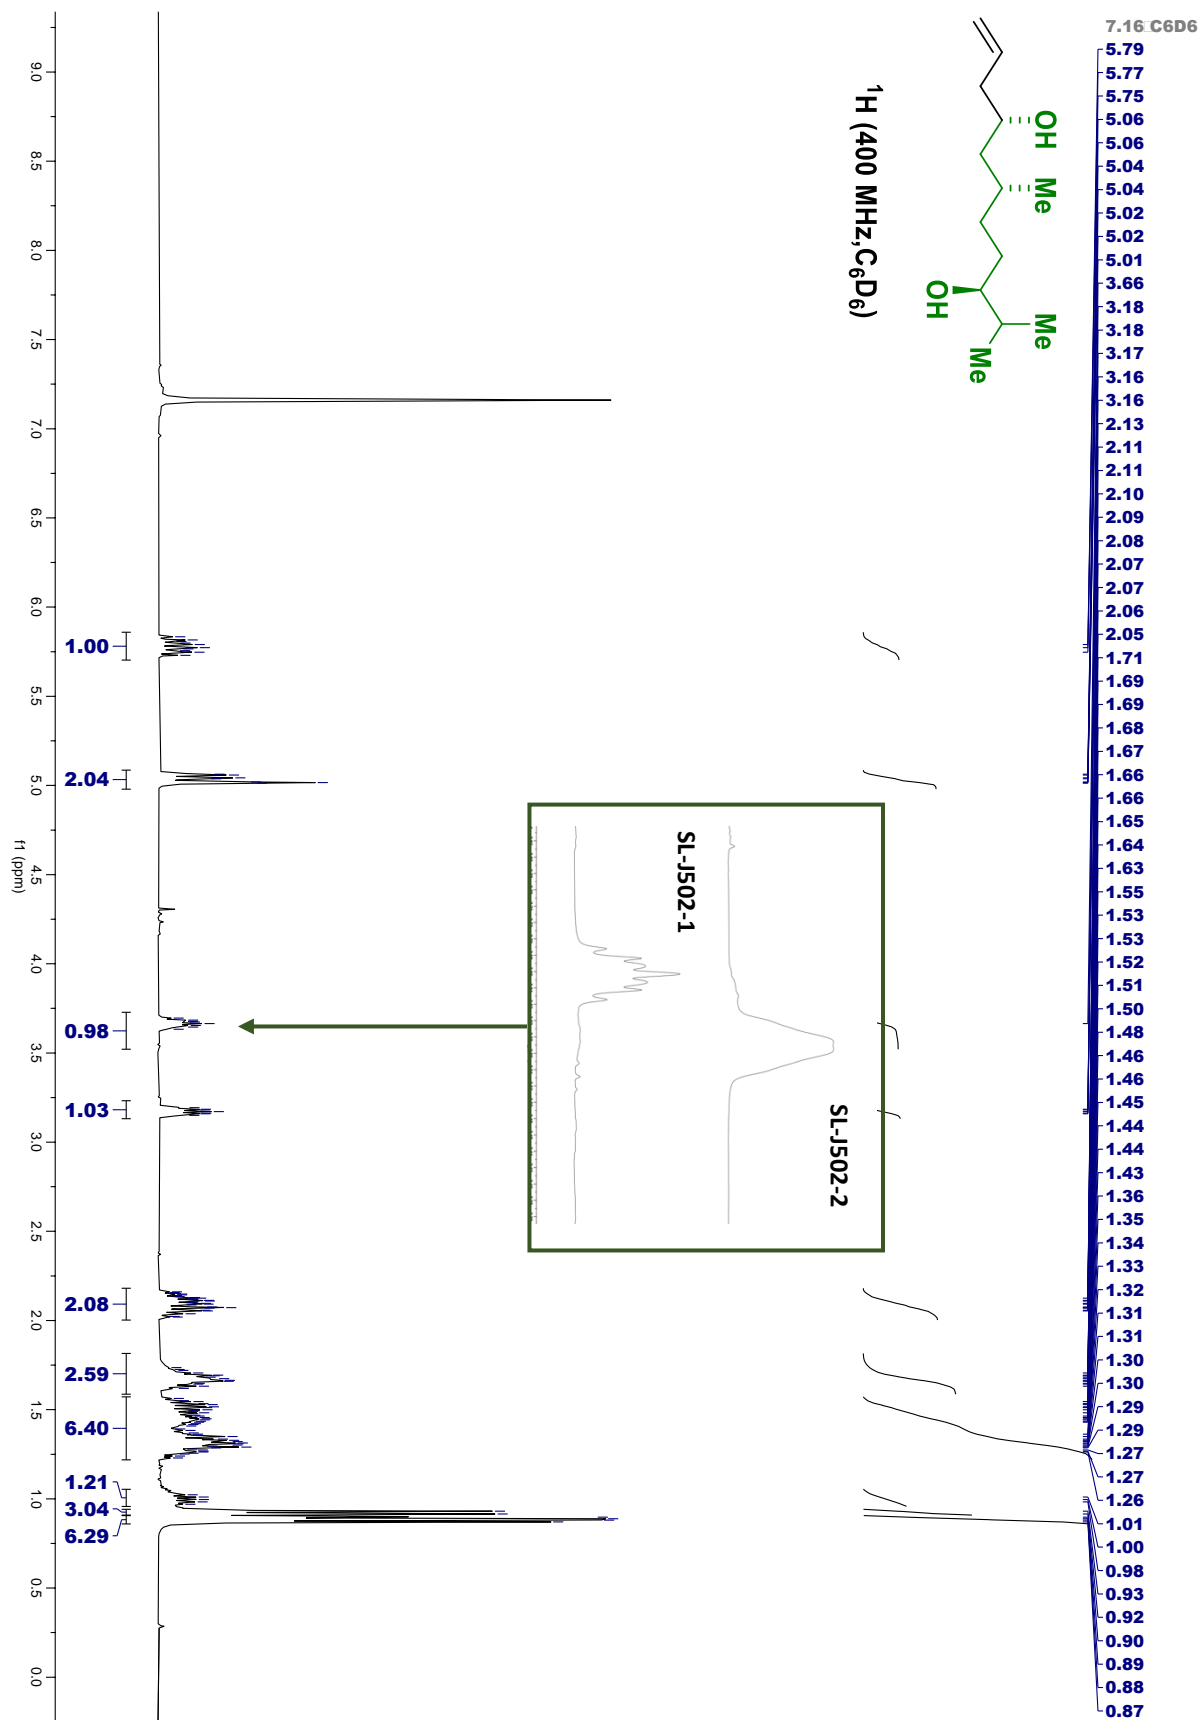



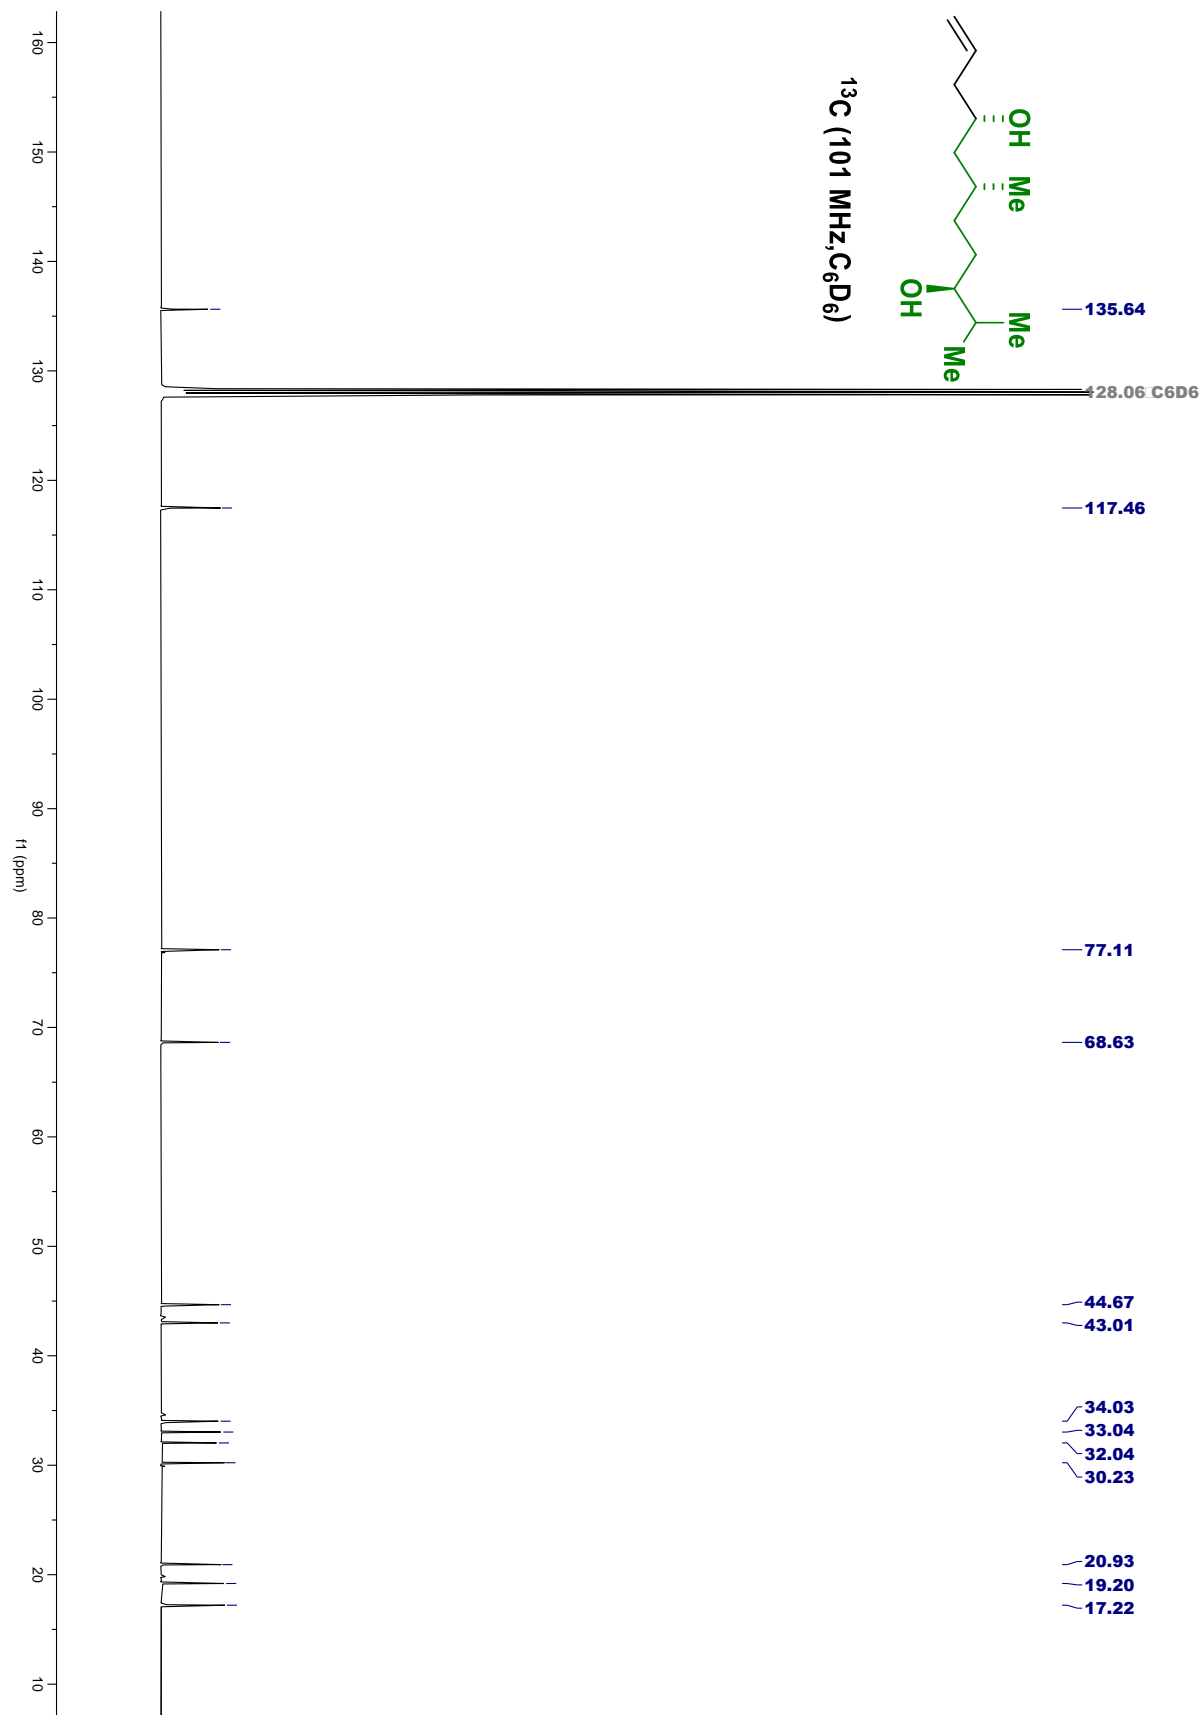

**(3*S*,6*R*,8*R*)-2,6-dimethylundec-10-ene-3,8-diol (*epi*-3*n*)**

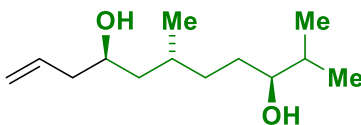

Alcohol **2n** (35.7 mg, 0.2 mmol) was subjected to standard reaction conditions (110 °C, 48 h) with **SL-J502-1** as ligand. Upon flash column chromatography (SiO<sub>2</sub>: 15:85 EtOAc:hexanes) the title compound ***epi*-3n** was isolated as a yellow oil in 75% yield (32.2 mg, 0.15 mmol, 15:1 dr).

**TLC (SiO<sub>2</sub>):** R<sub>f</sub> = 0.8 (1:1 EtOAc:hexanes)

**<sup>1</sup>H NMR** (400 MHz, C<sub>6</sub>D<sub>6</sub>): δ 5.75 (ddt, *J* = 17.4, 10.5, 7.2 Hz, 1H), 5.09 – 4.94 (m, 2H), 3.60 (dddd, *J* = 9.9, 7.0, 5.2, 3.0 Hz, 1H), 3.19 (ddd, *J* = 8.3, 5.0, 3.2 Hz, 1H), 2.23 – 1.90 (m, 2H), 1.75 (dtd, *J* = 13.0, 6.0, 2.9 Hz, 1H), 1.50 (m, 6H), 1.33 (dtd, *J* = 15.1, 8.8, 3.4 Hz, 1H), 1.24 – 1.02 (m, 2H), 0.99 – 0.77 (m, 9H).

**<sup>13</sup>C NMR** (101 MHz, C<sub>6</sub>D<sub>6</sub>): δ 135.6, 117.5, 76.8, 68.6, 44.5, 43.5, 34.6, 33.9, 32.1, 29.9, 19.8, 19.2, 17.2.

**HRMS** (Na<sup>+</sup>, *m/z*): for C<sub>13</sub>H<sub>26</sub>O<sub>2</sub>: calcd. = 237.1825; found = 237.1826.

**FTIR** (neat): 2962, 2890, 1496, 1380, 1200, 1051, 997, 820 cm<sup>-1</sup>.

[α]<sub>D</sub><sup>24</sup> = -31.1 (c = 0.1, CHCl<sub>3</sub>).

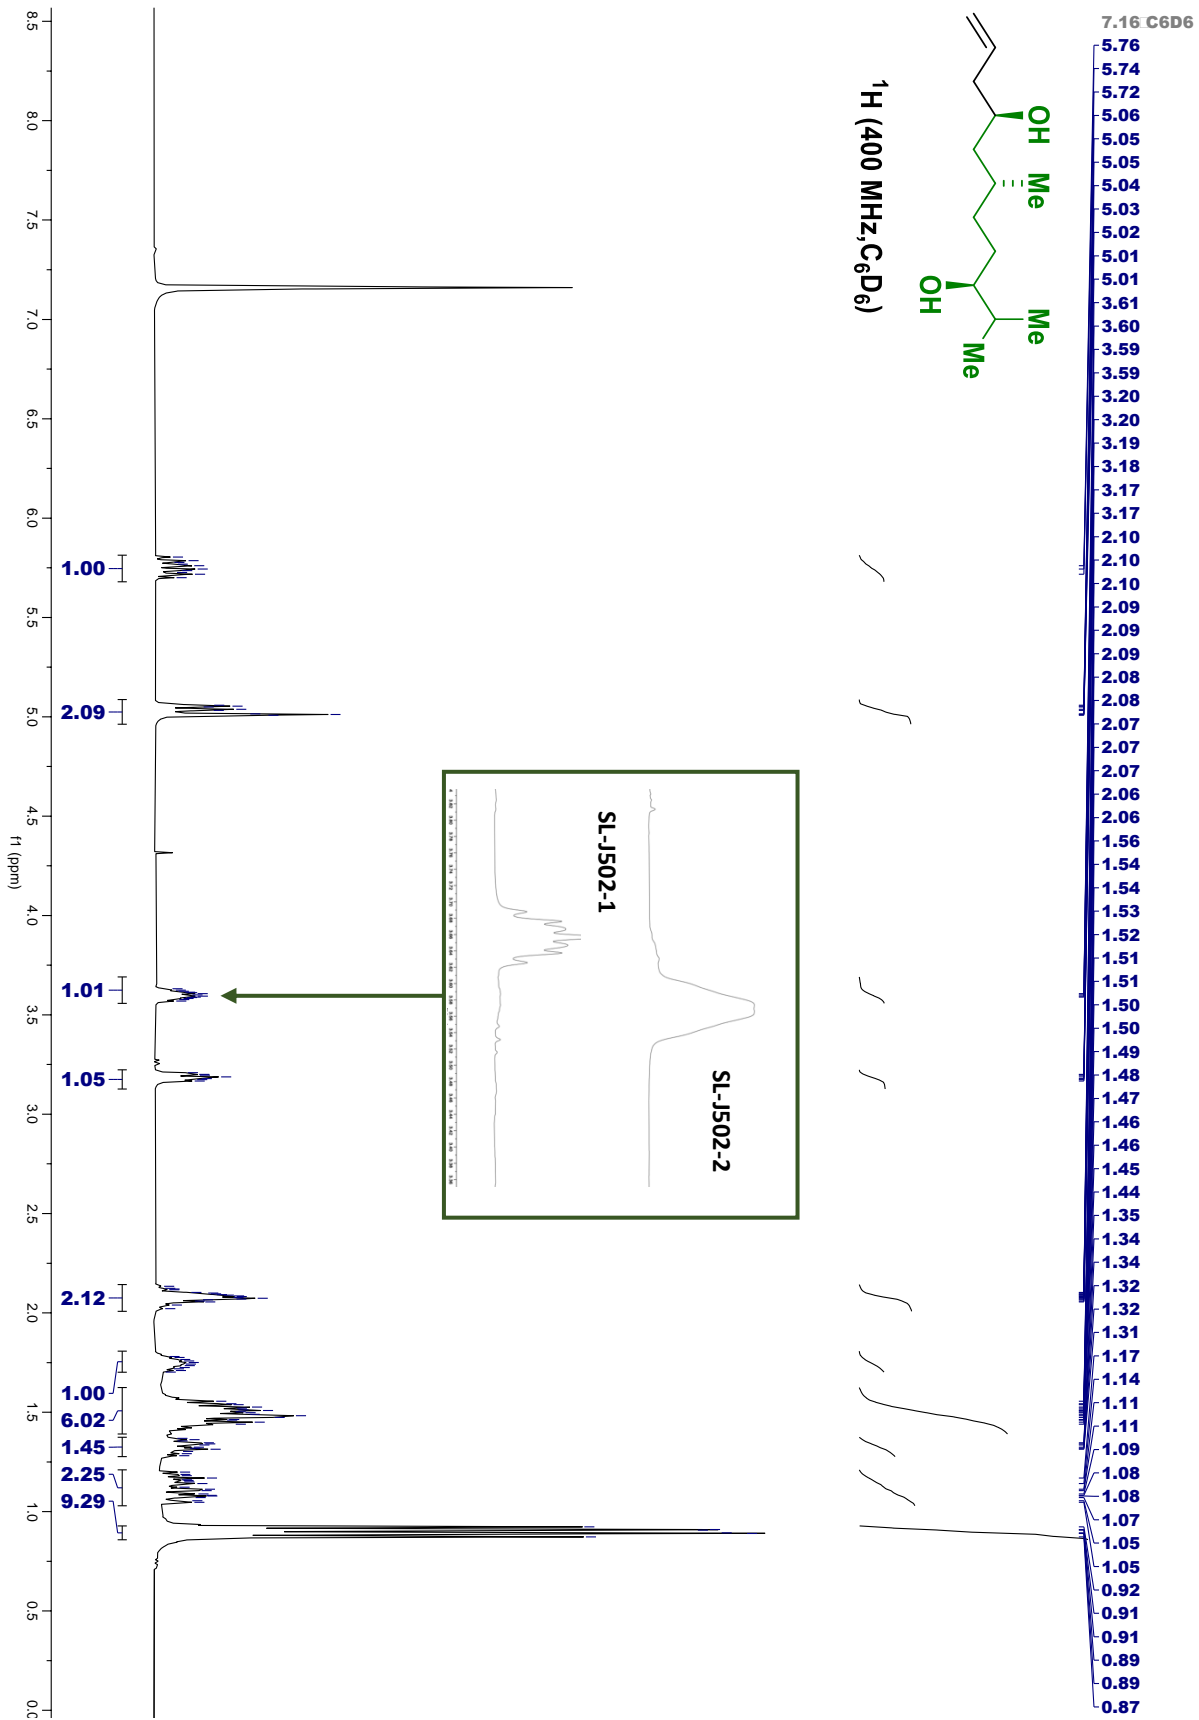

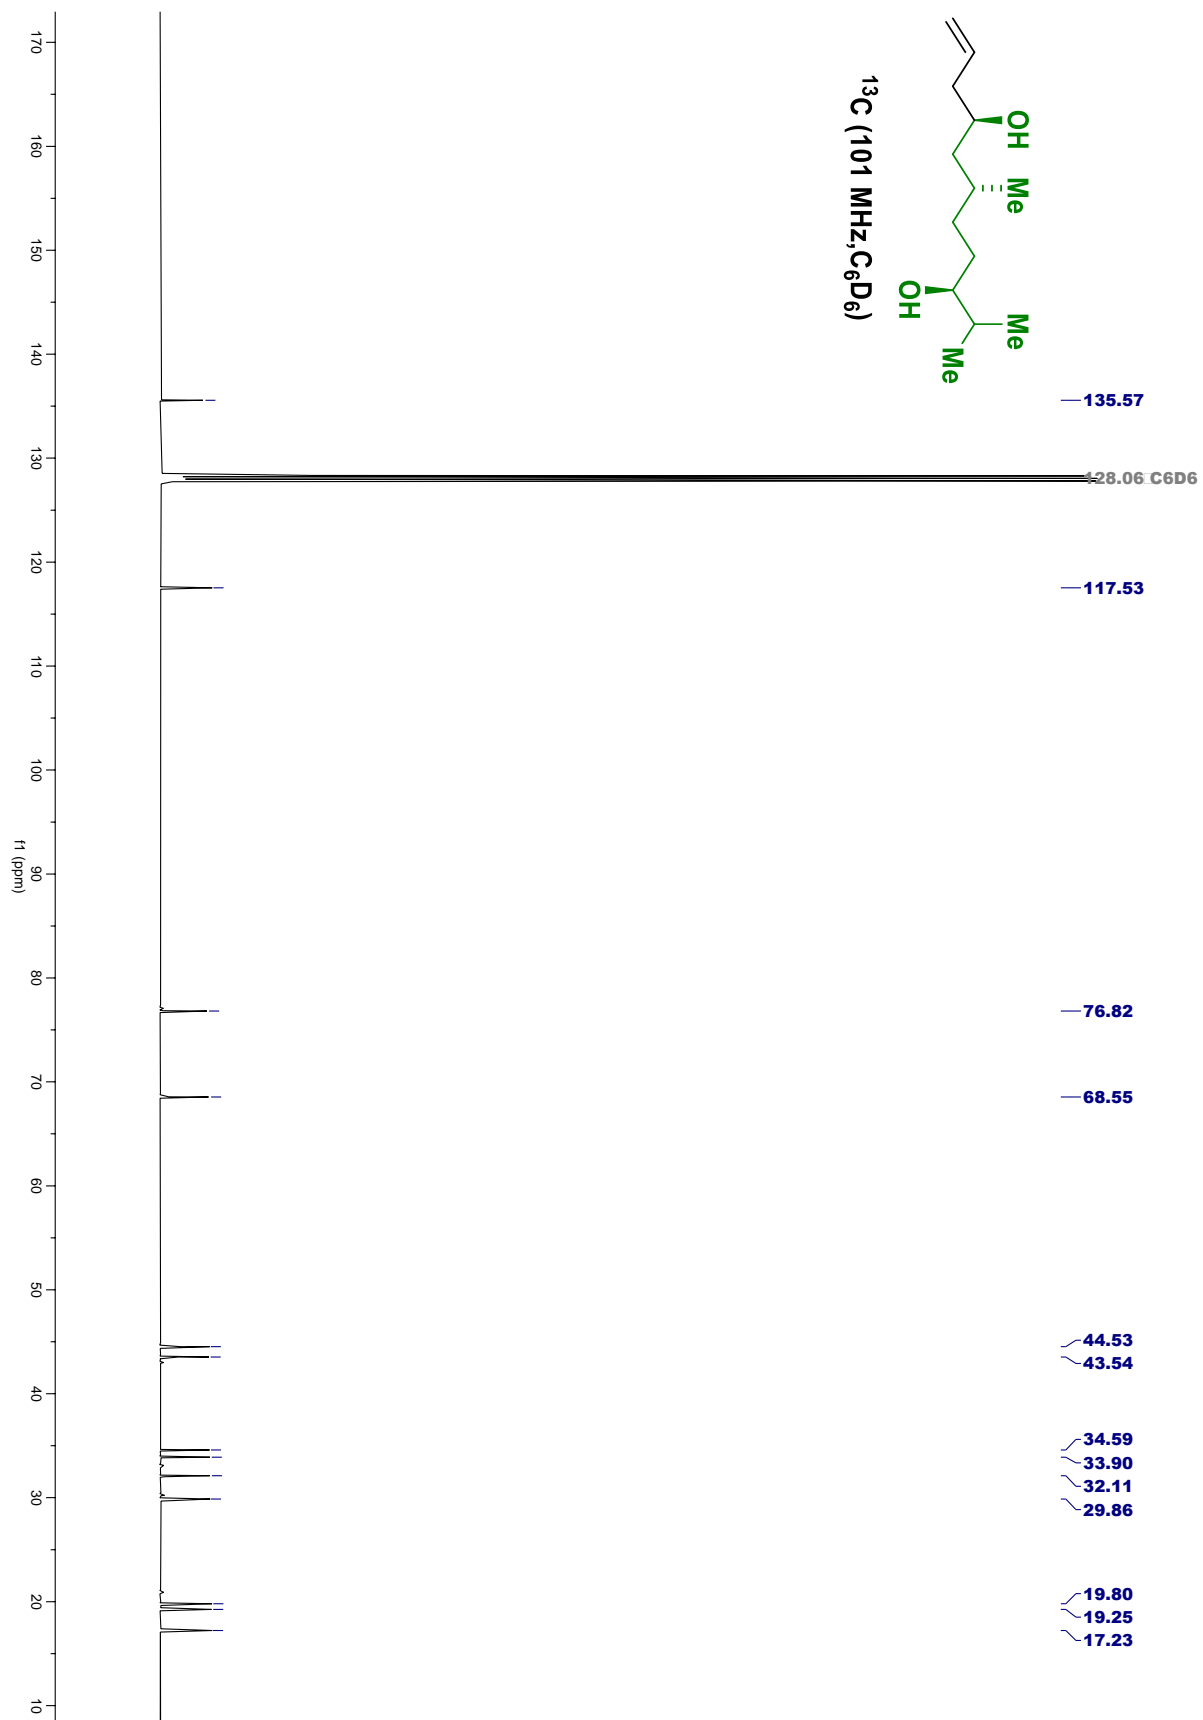

**(S)-N-((S)-3-hydroxyhex-5-en-1-yl)-2,2,5,5-tetramethyl-1,3-dioxane-4-carboxamide (3o)**

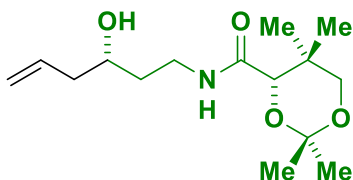

Alcohol **2o** (49.1 mg, 0.2 mmol) was subjected to standard reaction conditions (110 °C, 48 h) with **SL-J502-1** as ligand. Upon flash column chromatography (SiO<sub>2</sub>: 15:85 EtOAc:hexanes) the title compound **3o** was isolated as a yellow oil in 75% yield (42.8 mg, 0.17 mmol, 12:1 dr).

**TLC (SiO<sub>2</sub>):** R<sub>f</sub> = 0.4 (1:9 MeOH:DCM)

**<sup>1</sup>H NMR** (500 MHz, C<sub>6</sub>D<sub>6</sub>): δ 6.67 (t, *J* = 6.4 Hz, 1H), 5.86 (ddt, *J* = 17.2, 10.1, 7.0 Hz, 1H), 5.13 – 4.92 (m, 2H), 4.02 (s, 1H), 3.73 (d, *J* = 3.9 Hz, 1H), 3.66 (dq, *J* = 14.6, 7.3 Hz, 1H), 3.59 (q, *J* = 8.0, 7.3 Hz, 1H), 3.38 (d, *J* = 11.6 Hz, 1H), 3.09 (d, *J* = 11.6 Hz, 1H), 2.78 (dq, *J* = 13.9, 5.2 Hz, 1H), 2.22 (dt, *J* = 14.1, 7.0 Hz, 1H), 2.10 (dt, *J* = 13.6, 6.2 Hz, 1H), 1.41 (s, 3H), 1.34 – 1.23 (m, 2H), 1.09 (d, *J* = 5.8 Hz, 6H), 1.04 (s, 3H).

**<sup>13</sup>C NMR** (126 MHz, C<sub>6</sub>D<sub>6</sub>): δ 170.6, 135.9, 116.9, 99.1, 77.6, 71.5, 68.4, 42.3, 37.3, 36.0, 33.2, 29.7, 22.4, 19.3, 18.6.

**HRMS** (Na<sup>+</sup>, *m/z*): for C<sub>15</sub>H<sub>27</sub>NO<sub>4</sub>: calcd. = 308.1832; found = 308.1831.

**FTIR** (neat): 3340, 2954, 1650, 1521, 1442, 1147, 1044, 907 .cm<sup>-1</sup>.

**[α]<sub>D</sub><sup>24</sup>** = -33.5 (c = 0.1, CHCl<sub>3</sub>).

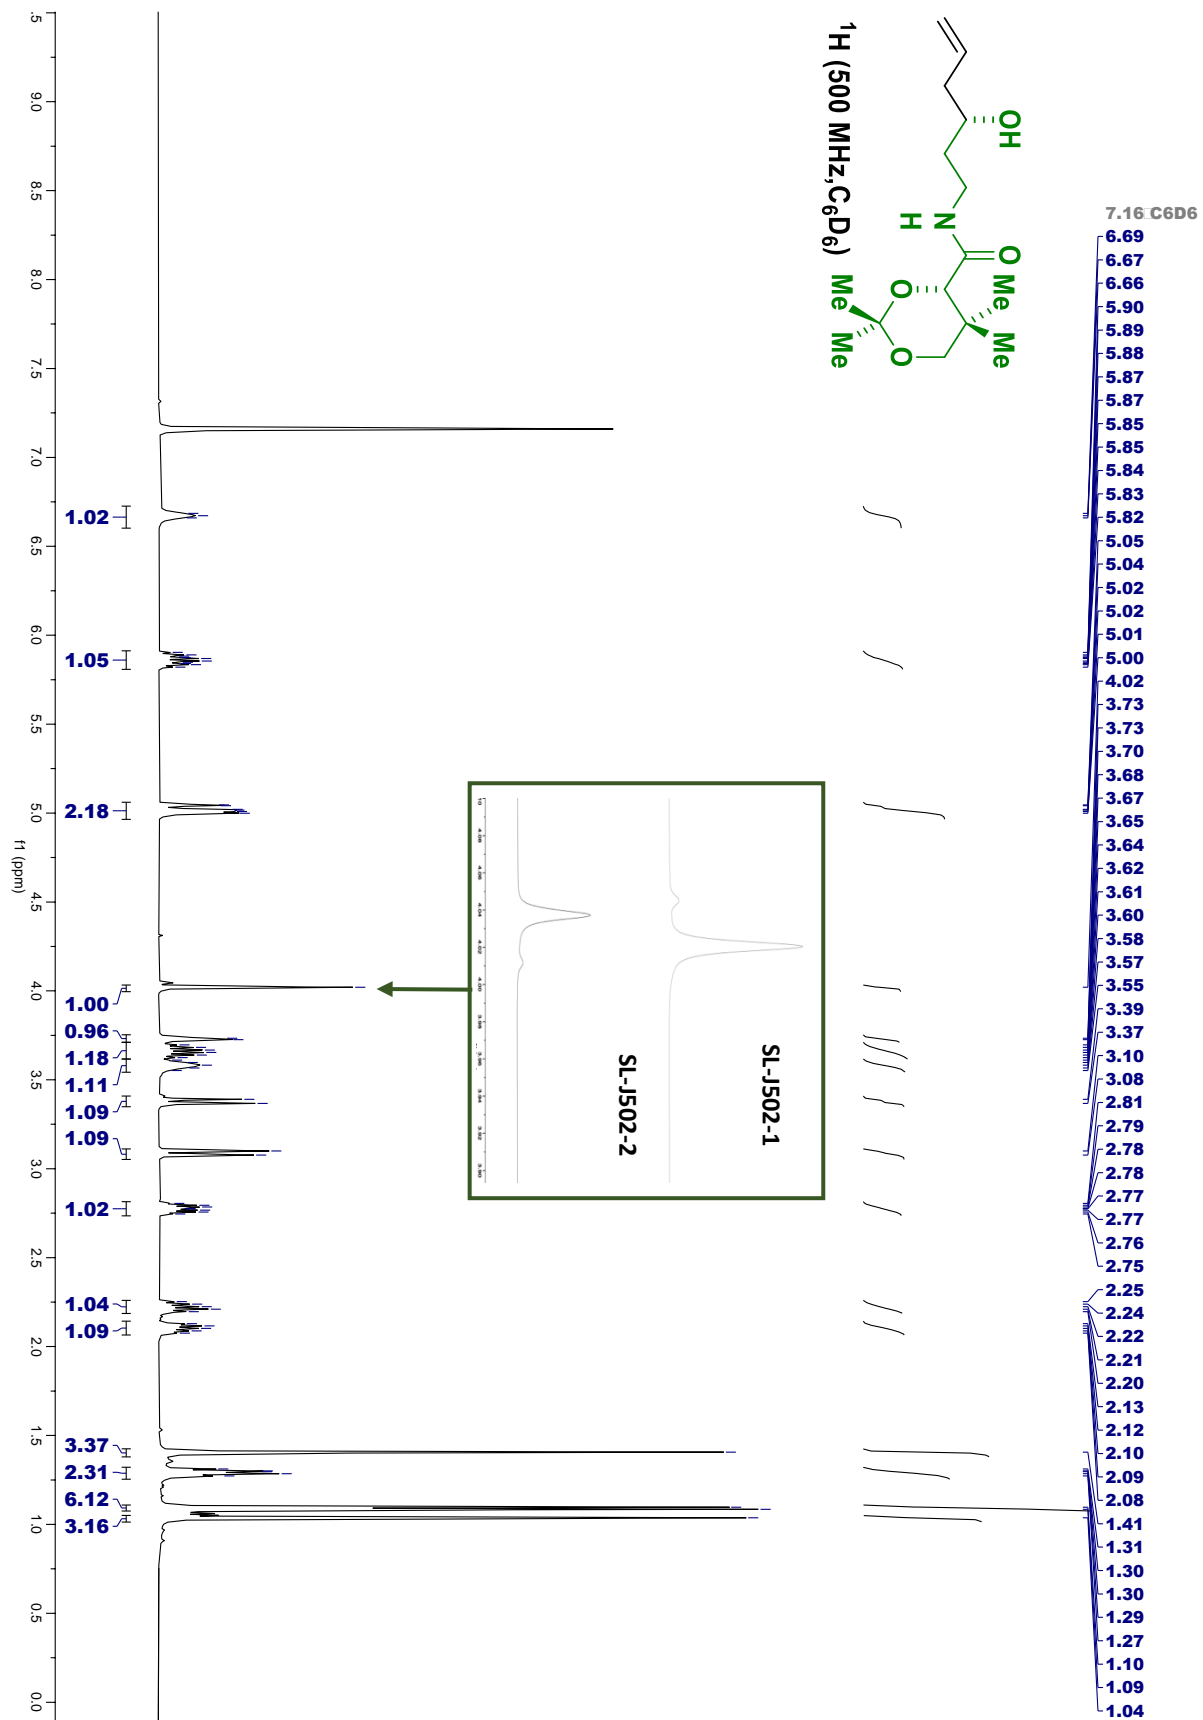

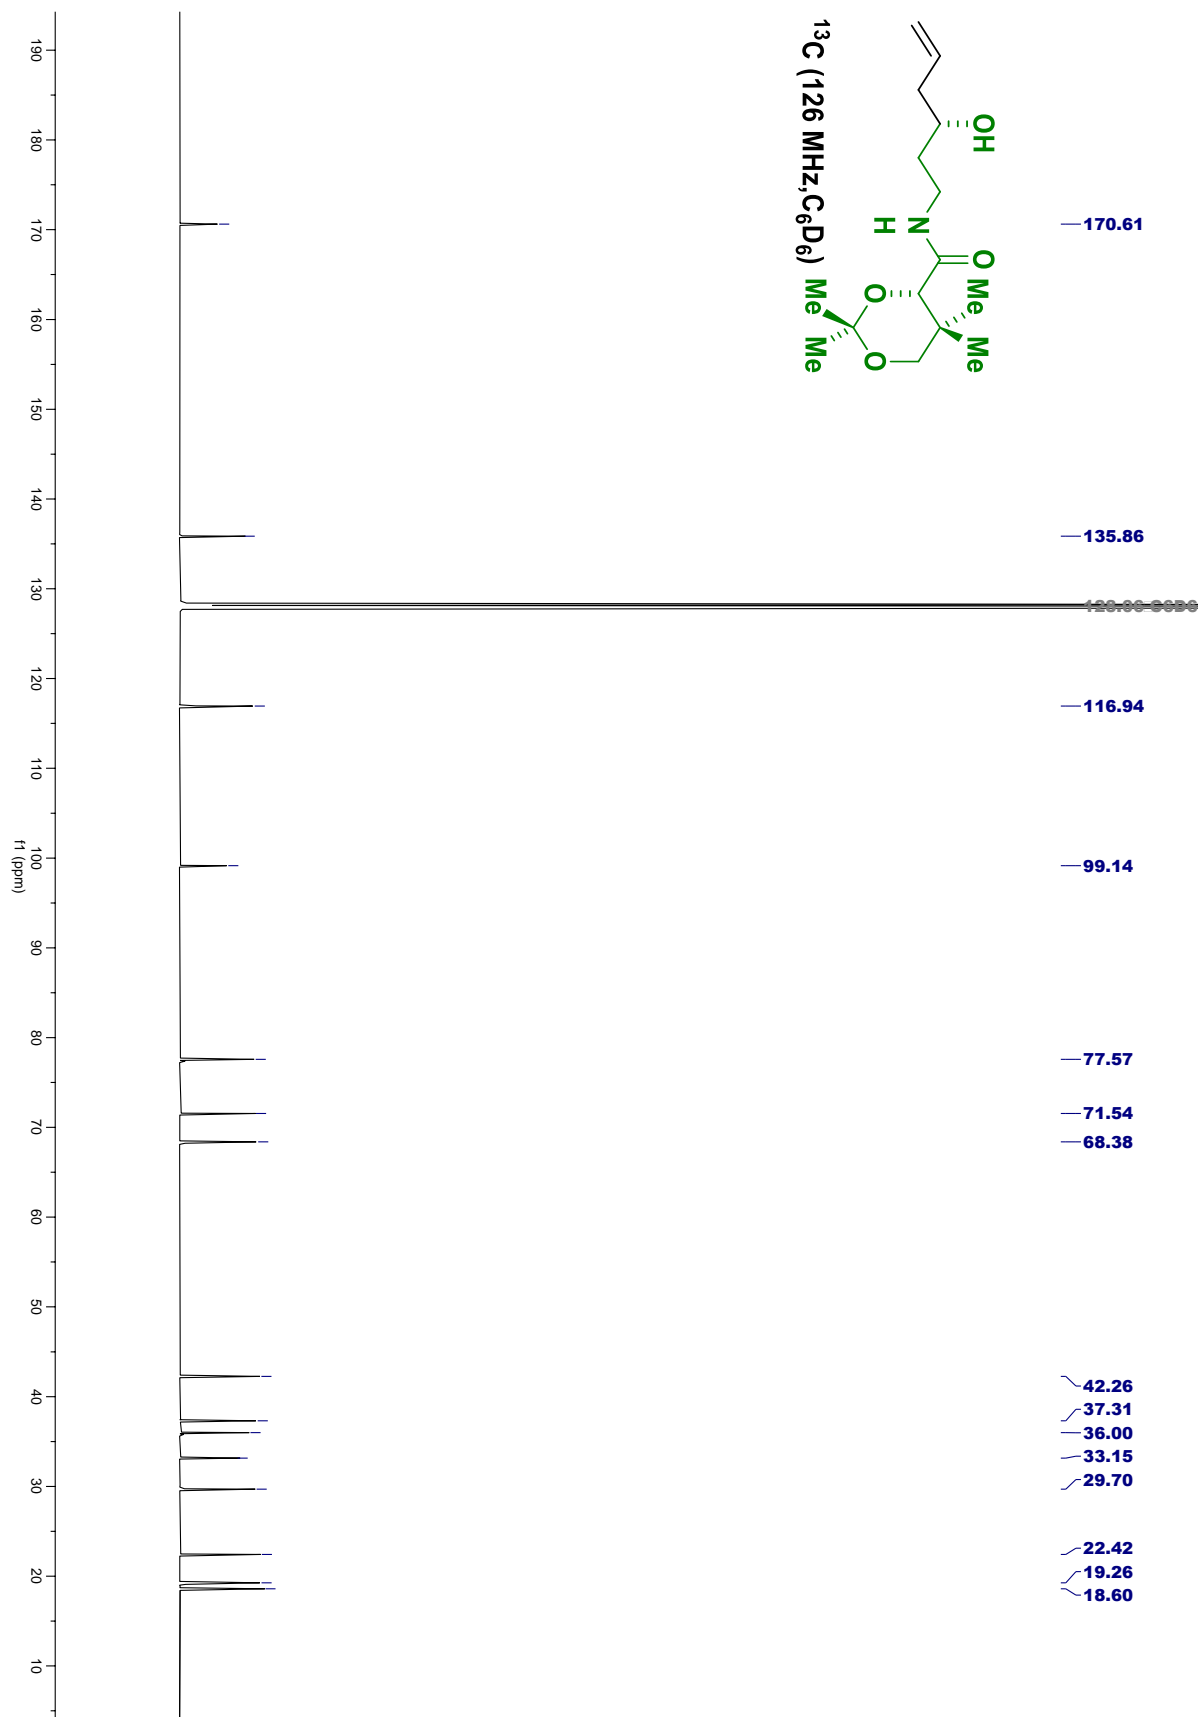

**(S)-N-((R)-3-hydroxyhex-5-en-1-yl)-2,2,5,5-tetramethyl-1,3-dioxane-4-carboxamide (*epi-3o*)**

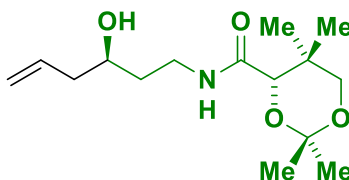

Alcohol **2o** (49.1 mg, 0.2 mmol) was subjected to standard reaction conditions (110 °C, 48 h) with **SL-J502-2** as ligand. Upon flash column chromatography (SiO<sub>2</sub>: 15:85 EtOAc:hexanes) the title compound ***epi-3o*** was isolated as a yellow oil in 75% yield (42.8 mg, 0.17 mmol, 12:1 dr).

**TLC (SiO<sub>2</sub>):** R<sub>f</sub> = 0.4 (1:9 MeOH:DCM)

**<sup>1</sup>H NMR** (500 MHz, C<sub>6</sub>D<sub>6</sub>): δ 6.62 (s, 1H), 5.85 (ddt, *J* = 17.2, 10.2, 7.0 Hz, 1H), 5.10 – 4.90 (m, 2H), 4.04 (s, 1H), 3.67 – 3.58 (m, 1H), 3.58 – 3.46 (m, 2H), 3.38 (d, *J* = 11.6 Hz, 1H), 3.09 (d, *J* = 11.7 Hz, 1H), 2.77 (dq, *J* = 14.7, 5.1 Hz, 1H), 2.16 (dt, *J* = 14.1, 7.2 Hz, 1H), 2.05 (dt, *J* = 13.5, 6.1 Hz, 1H), 1.40 (s, 3H), 1.32 – 1.19 (m, 2H), 1.06 (m, 9H).

**<sup>13</sup>C NMR** (126 MHz, C<sub>6</sub>D<sub>6</sub>): δ 170.2, 135.5, 116.6, 98.7, 77.0, 71.1, 67.7, 41.8, 37.1, 35.3, 32.8, 29.4, 22.0, 18.7, 18.2.

**HRMS** (Na<sup>+</sup>, *m/z*): for C<sub>15</sub>H<sub>27</sub>NO<sub>4</sub>: calcd. = 308.1832; found = 308.1832.

**FTIR** (neat): 3340, 2954, 1650, 1521, 1442, 1147, 1044, 907 .cm<sup>-1</sup>.

**[α]<sub>D</sub><sup>24</sup>** = -58.4 (c = 0.1, CHCl<sub>3</sub>).



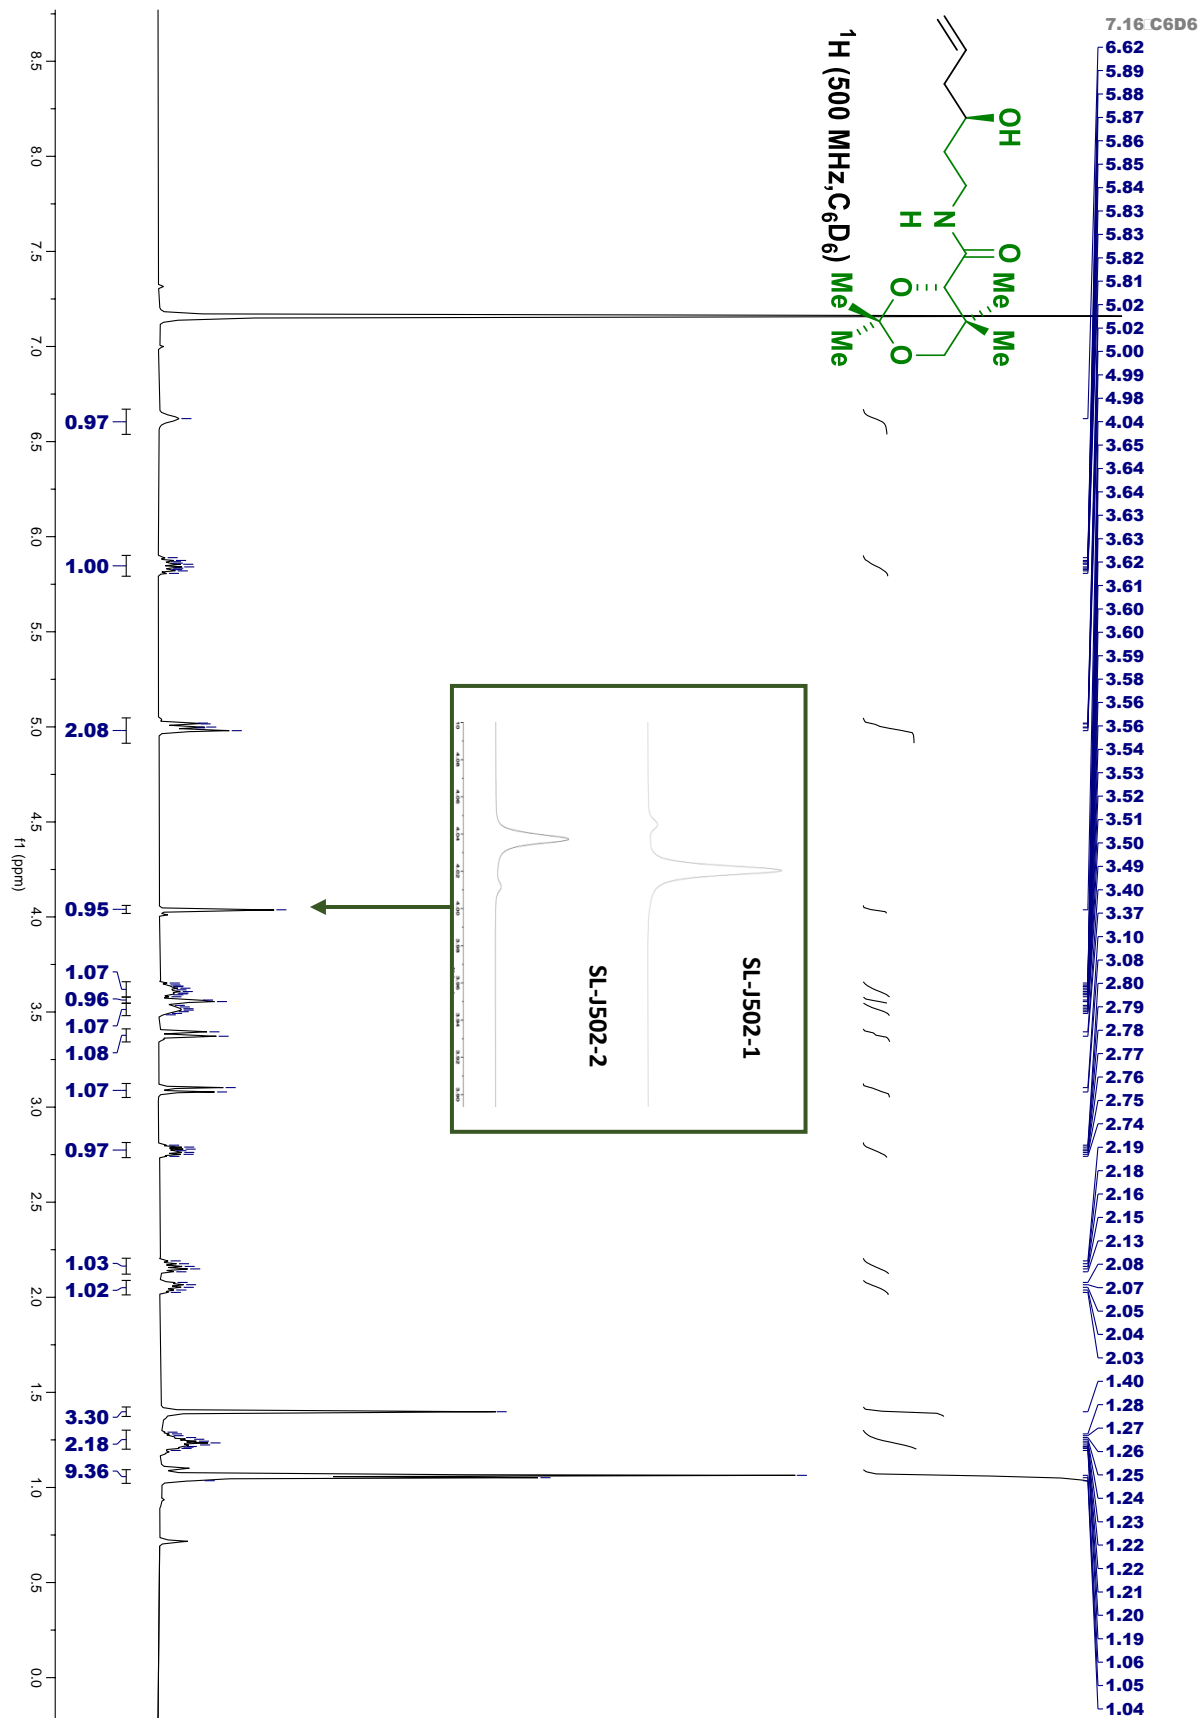

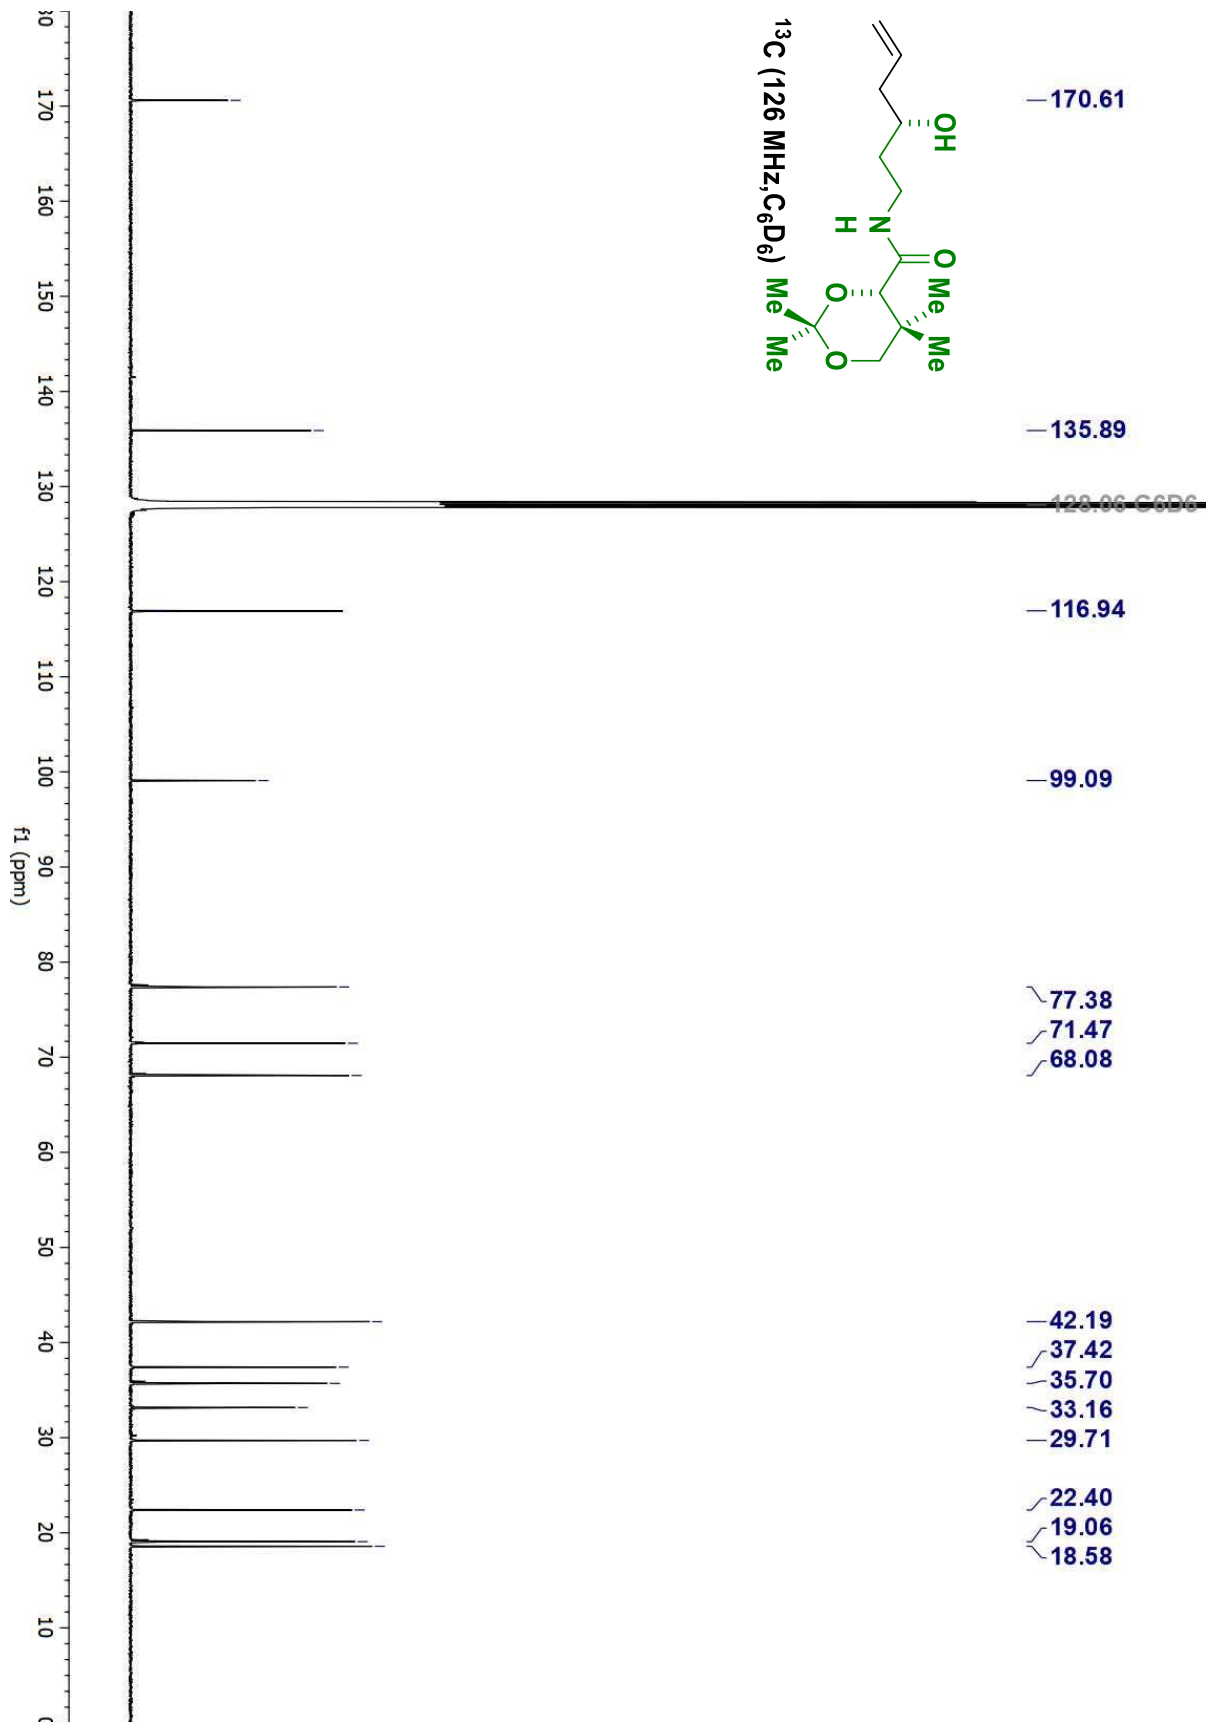

**(1*R*,3*S*,7*R*,8*R*)-8-(2-((4*R*,6*S*)-6-((*S*)-2-hydroxypent-4-en-1-yl)-2,2-dimethyl-1,3-dioxan-4-yl)ethyl)-3,7-dimethyl-1,2,3,7,8,8a-hexahydronaphthalen-1-ol (3*p*)**

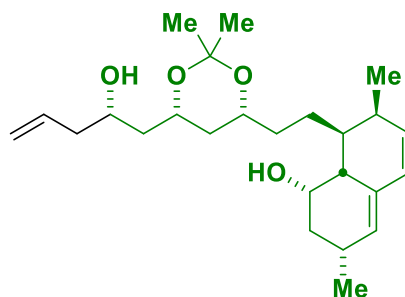

Alcohol **2p** (73.0 mg, 0.2 mmol) was subjected to standard reaction conditions (110 °C, 48 h) with **SL-J502-1** as ligand. Upon flash column chromatography (SiO<sub>2</sub>: 15:85 EtOAc:hexanes) the title compound **3p** was isolated as a yellow oil in 80% yield (64.0 mg, 0.16 mmol, 17:1 dr).

**TLC (SiO<sub>2</sub>):** R<sub>f</sub> = 0.5 (2:3 EtOAc:hexanes)

**<sup>1</sup>H NMR** (400 MHz, C<sub>6</sub>D<sub>6</sub>): δ 5.97 (d, *J* = 9.6 Hz, 1H), 5.89 – 5.80 (m, 1H), 5.80 – 5.75 (m, 1H), 5.53 (t, *J* = 3.3 Hz, 1H), 5.14 – 5.05 (m, 2H), 4.23 (dt, *J* = 7.1, 3.4 Hz, 1H), 4.11 (dddd, *J* = 13.3, 8.3, 6.0, 3.1 Hz, 1H), 3.91 – 3.86 (m, 1H), 3.86 – 3.81 (m, 1H), 3.44 (d, *J* = 1.4 Hz, 1H), 2.48 – 2.32 (m, 2H), 2.30 – 2.18 (m, 2H), 2.18 – 2.09 (m, 1H), 2.00 (s, 2H), 1.93 – 1.84 (m, 2H), 1.83 – 1.68 (m, 2H), 1.65 – 1.58 (m, 3H), 1.46 (s, 3H), 1.38 (s, 3H), 1.34 – 1.22 (m, 3H), 1.19 (d, *J* = 7.5 Hz, 3H), 0.88 (d, *J* = 7.0 Hz, 3H).

**<sup>13</sup>C NMR** (101 MHz, C<sub>6</sub>D<sub>6</sub>): δ 135.0, 134.0, 131.6, 130.2, 128.6, 117.5, 98.9, 71.1, 70.4, 68.8, 65.6, 42.5, 42.2, 38.9, 37.6, 36.2, 35.8, 33.3, 30.9, 30.5, 30.3, 27.7, 23.9, 23.6, 20.2, 19.9, 14.1.

**HRMS** (Na<sup>+</sup>, *m/z*): for C<sub>25</sub>H<sub>40</sub>O<sub>4</sub>: calcd. = 427.2819; found = 427.2815.

**FTIR** (neat): 3459, 2995, 2939, 2890, 1454, 1380, 913, 730 cm<sup>-1</sup>.

**[α]<sub>D</sub><sup>24</sup>** = +72.7 (c = 0.1, CHCl<sub>3</sub>).

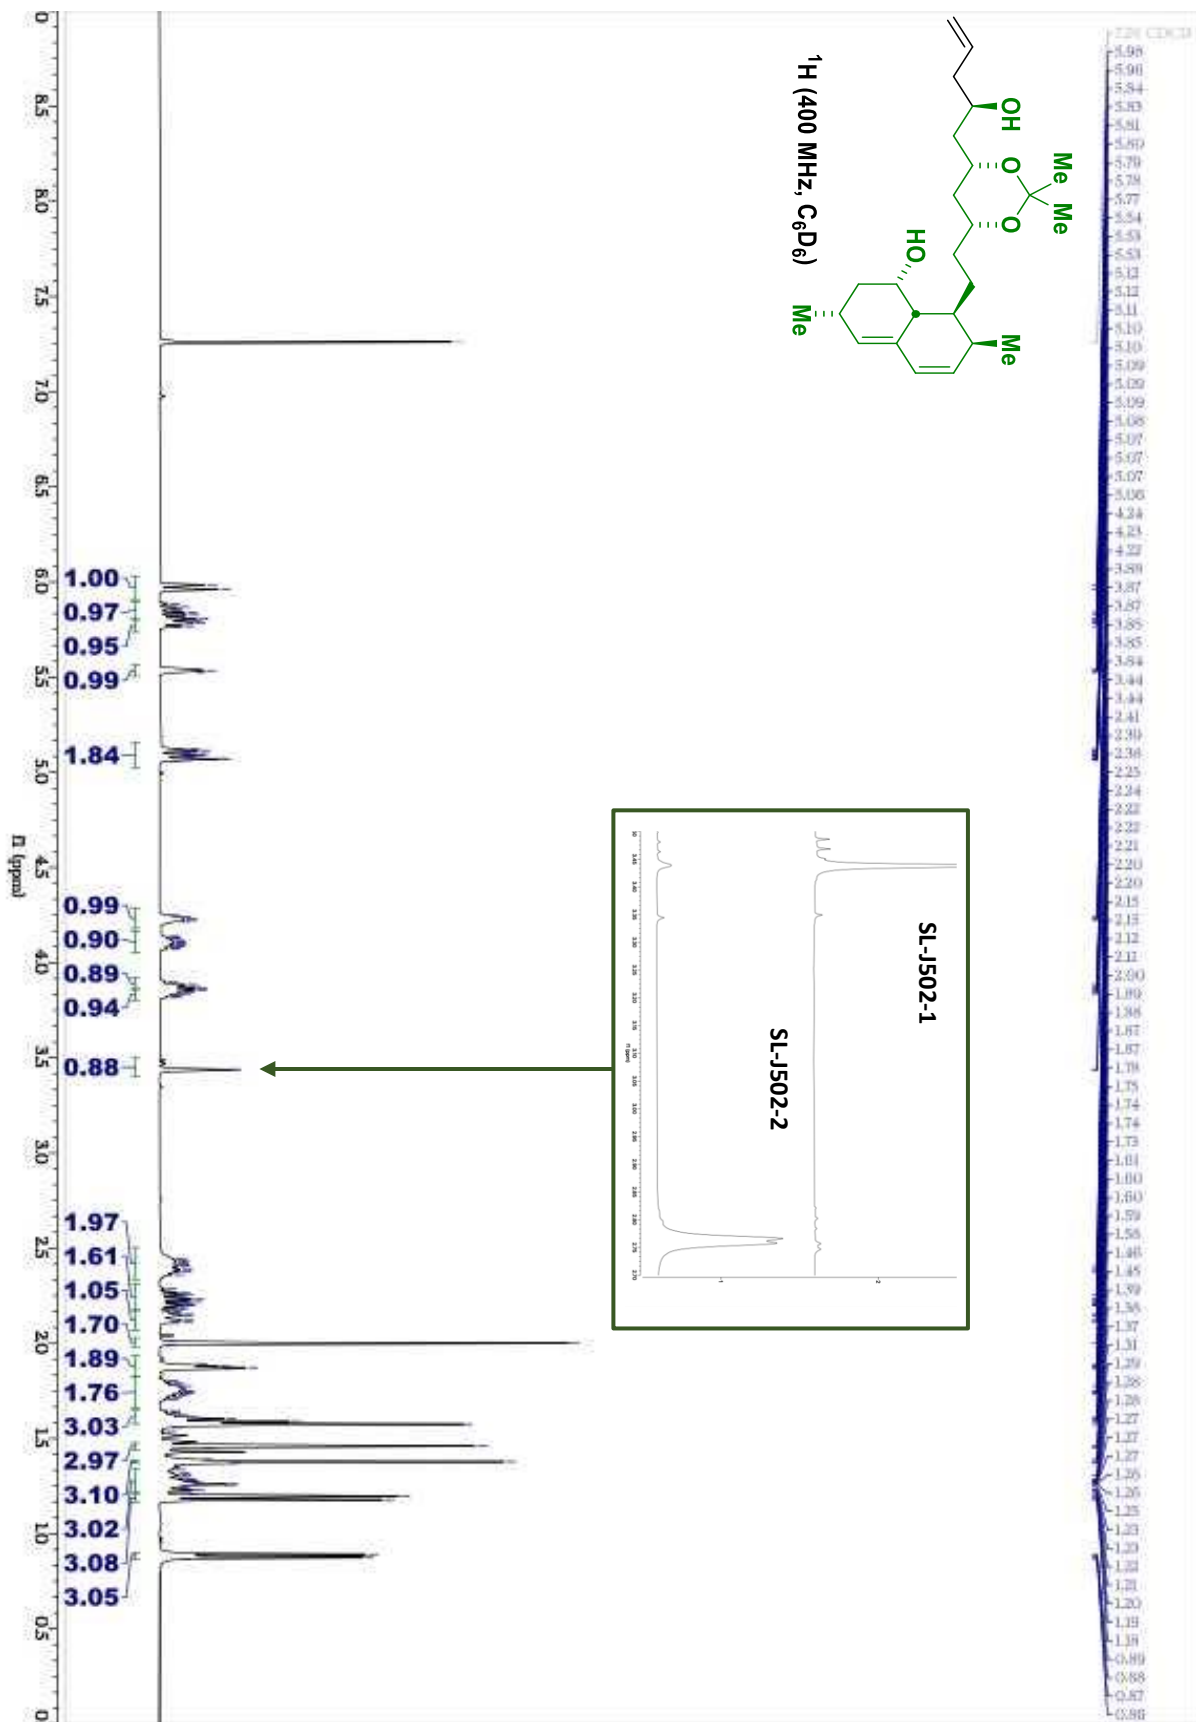

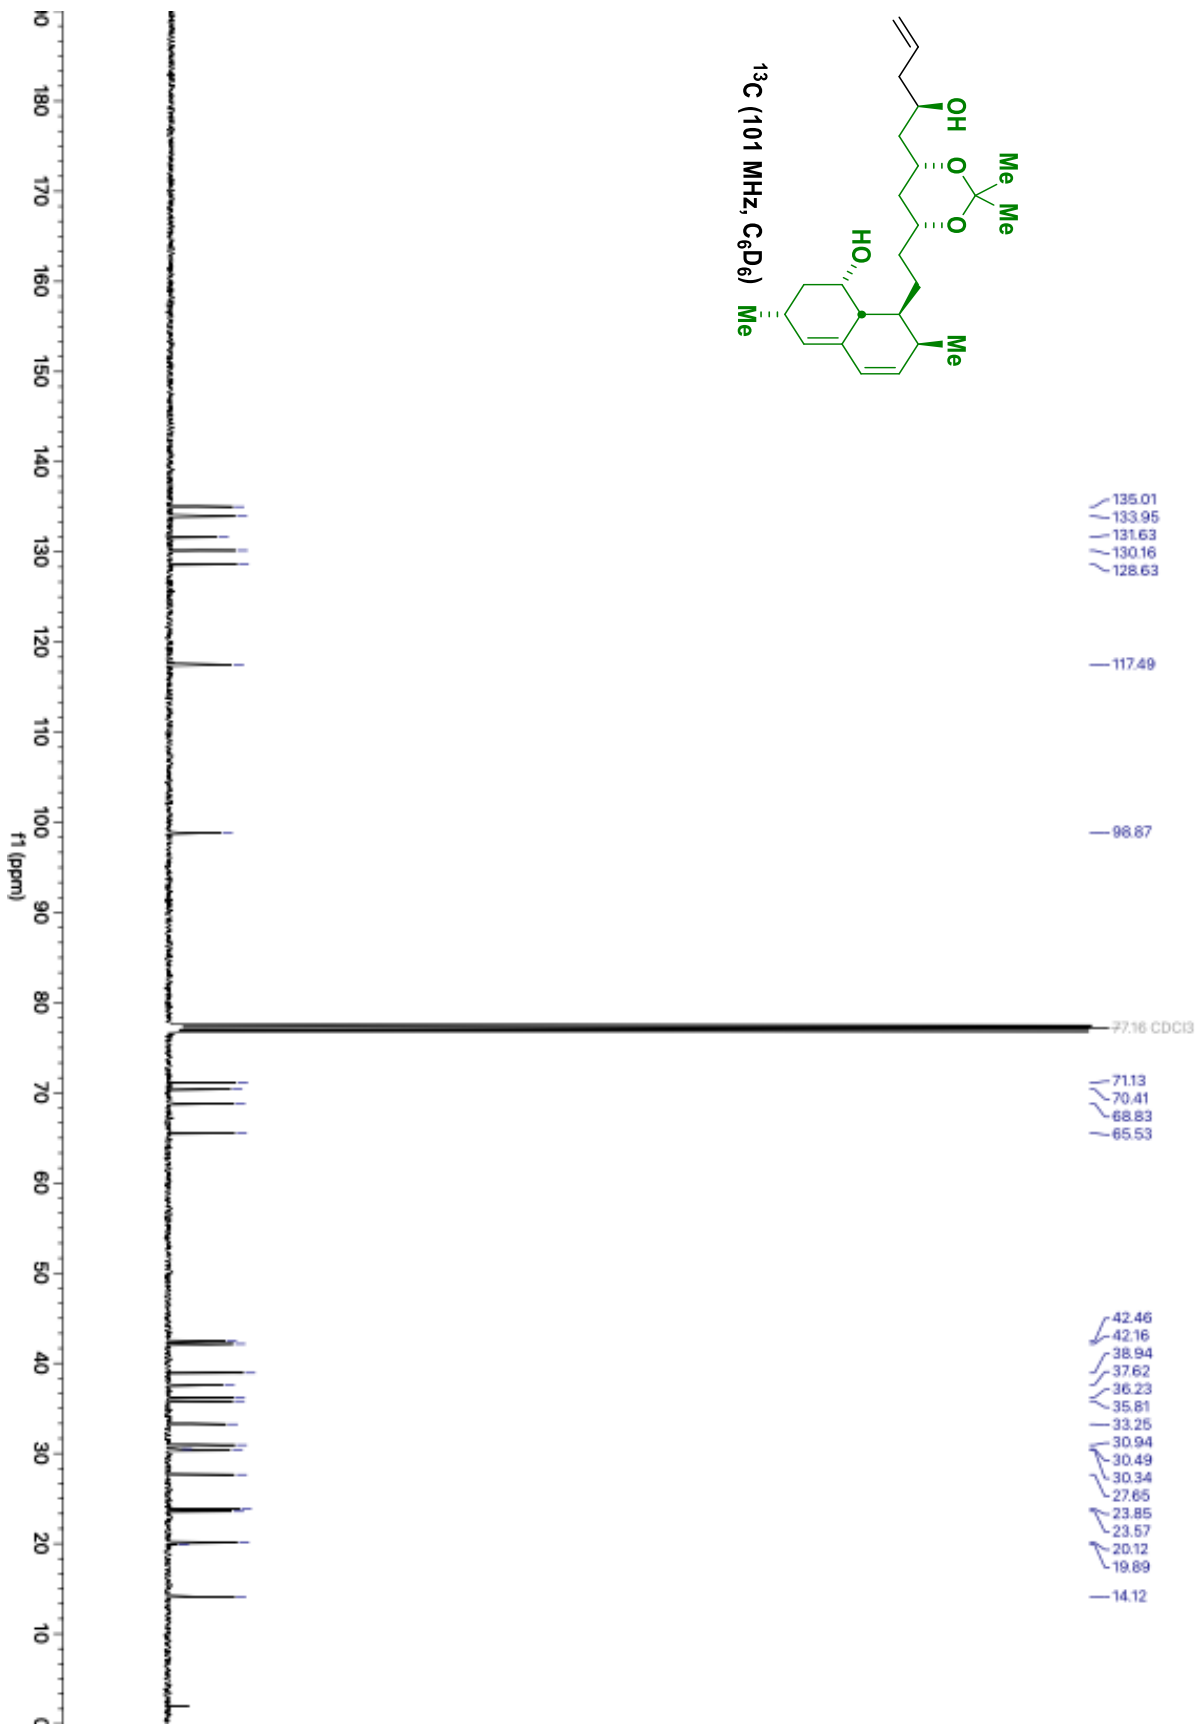

**(1*R*,3*S*,7*R*,8*R*)-8-(2-((4*R*,6*S*)-6-((*R*)-2-hydroxypent-4-en-1-yl)-2,2-dimethyl-1,3-dioxan-4-yl)ethyl)-3,7-dimethyl-1,2,3,7,8,8a-hexahydronaphthalen-1-ol (*epi*-3*p*)**

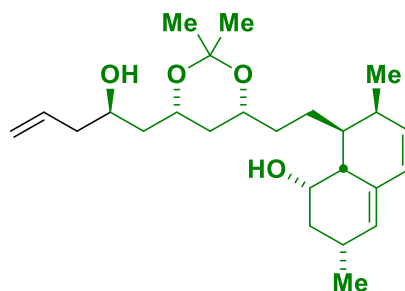

Alcohol **2p** (73.0 mg, 0.2 mmol) was subjected to standard reaction conditions (110 °C, 48 h) with **SL-J502-2** as ligand. Upon flash column chromatography (SiO<sub>2</sub>: 15:85 EtOAc:hexanes) the title compound **epi-3p** was isolated as a yellow oil in 84% yield (68.0 mg, 0.17 mmol, 17:1 dr).

**TLC (SiO<sub>2</sub>):** R<sub>f</sub> = 0.5 (2:3 EtOAc:hexanes)

**<sup>1</sup>H NMR** (400 MHz, C<sub>6</sub>D<sub>6</sub>): δ 5.97 (d, *J* = 9.6 Hz, 1H), 5.89 – 5.80 (m, 1H), 5.78 (dd, *J* = 8.4, 5.1 Hz, 1H), 5.53 (t, *J* = 3.2 Hz, 1H), 5.15 – 5.06 (m, 2H), 4.23 (q, *J* = 3.8 Hz, 1H), 4.17 (ddt, *J* = 8.0, 5.2, 2.6 Hz, 1H), 3.93 (tt, *J* = 9.1, 4.6 Hz, 1H), 3.85 (ddt, *J* = 11.1, 7.3, 3.5 Hz, 1H), 2.76 (d, *J* = 3.8 Hz, 1H), 2.40 (dq, *J* = 17.8, 6.8, 4.1 Hz, 2H), 2.26 – 2.18 (m, 2H), 2.13 (dq, *J* = 12.0, 2.9 Hz, 1H), 1.92 – 1.83 (m, 2H), 1.82 – 1.70 (m, 2H), 1.62 (t, *J* = 5.6 Hz, 3H), 1.44 (s, 3H), 1.38 (s, 3H), 1.35 – 1.23 (m, 3H), 1.18 (d, *J* = 7.5 Hz, 3H), 0.88 (d, *J* = 7.0 Hz, 3H).

**<sup>13</sup>C NMR** (101 MHz, C<sub>6</sub>D<sub>6</sub>): δ 135.1, 133.9, 131.6, 130.1, 128.6, 117.7, 98.9, 68.9, 67.7, 67.2, 65.5, 42.2, 41.8, 38.9, 37.0, 36.2, 35.8, 33.3, 30.9, 30.4, 27.7, 23.8, 23.6, 19.9, 14.1.

**HRMS** (Na<sup>+</sup>, *m/z*): for C<sub>25</sub>H<sub>40</sub>O<sub>4</sub>: calcd. = 427.2819; found = 427.2815.

**FTIR** (neat): 3480, 3013, 2888, 2821, 1451, 1330, 931, 801 cm<sup>-1</sup>.

**[α]<sub>D</sub><sup>24</sup>** = +16.7 (c = 0.1, CHCl<sub>3</sub>).



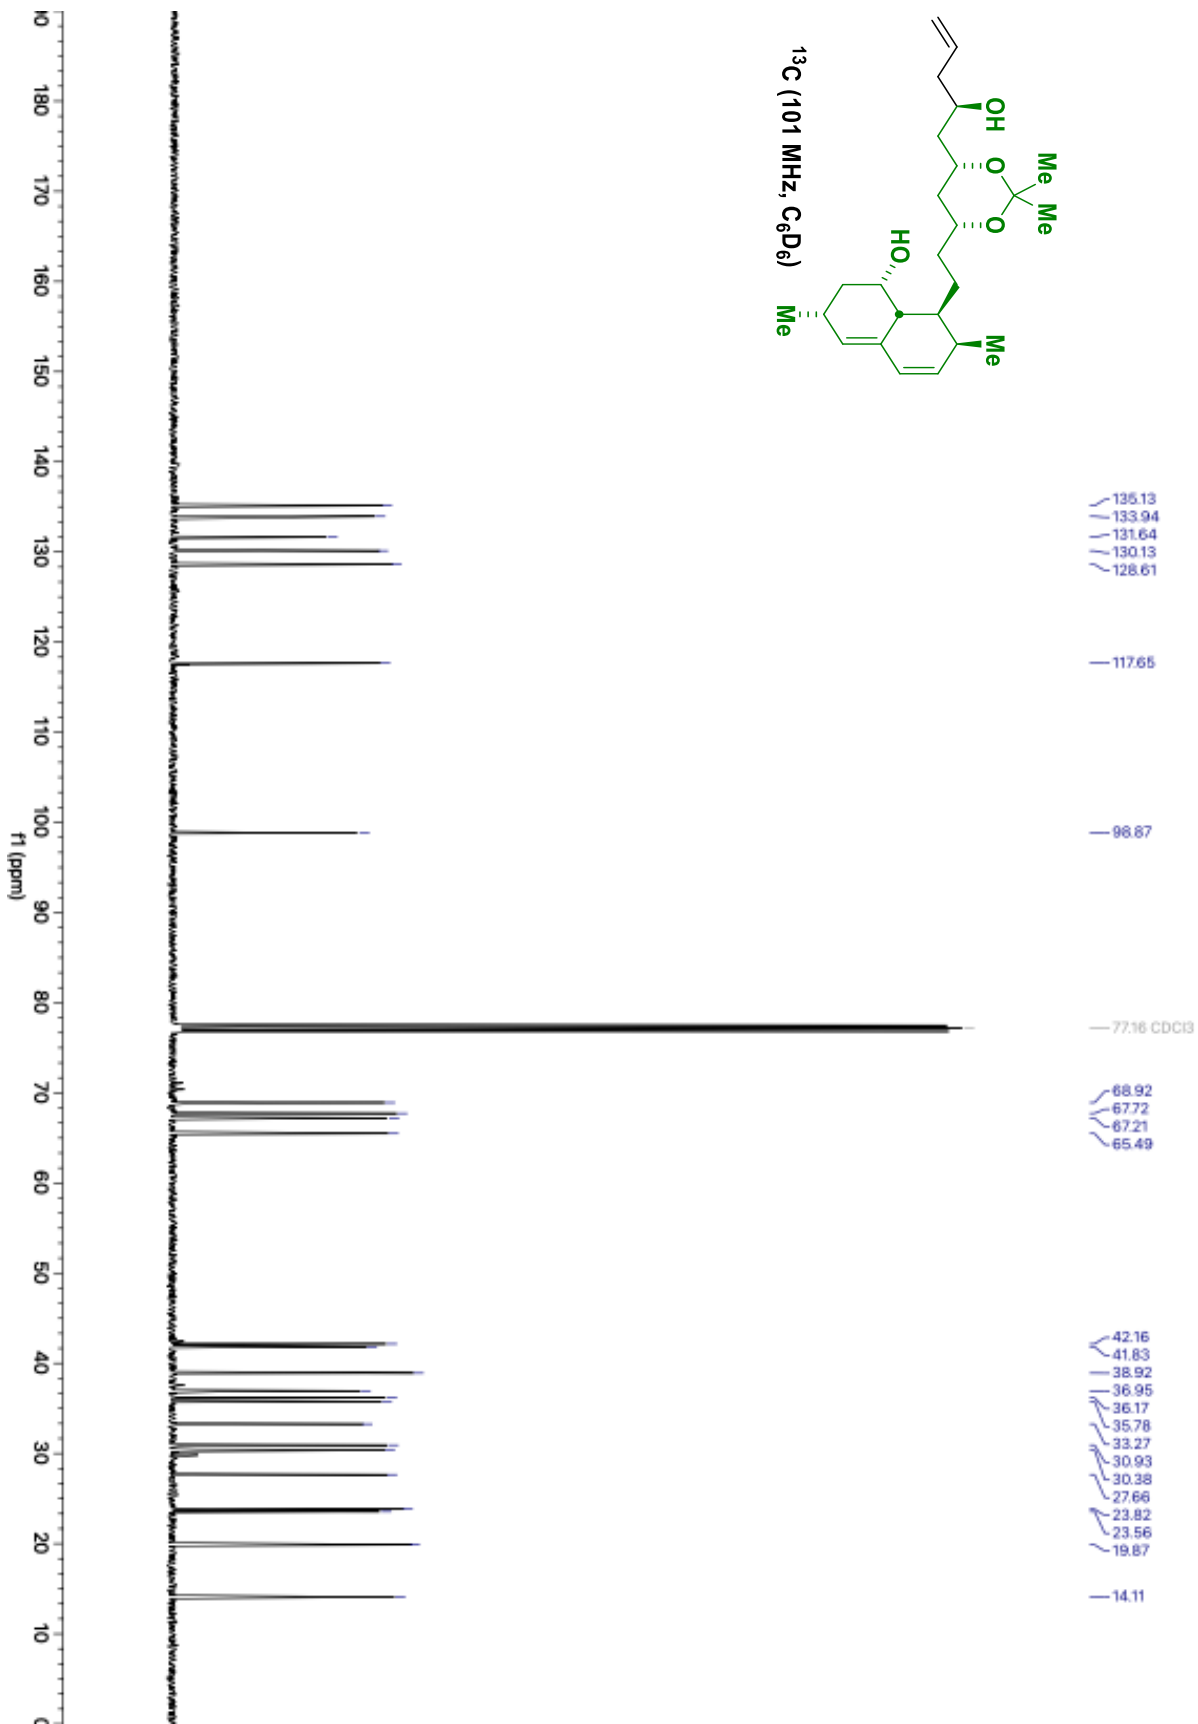



**5-(4-fluorophenyl)-1-(2-((4R,6S)-6-((S)-2-hydroxy-pent-4-en-1-yl)-2,2-dimethyl-1,3-dioxan-4-yl)ethyl)-2-isopropyl-N,4-diphenyl-1H-pyrrole-3-carboxamide (3q)**

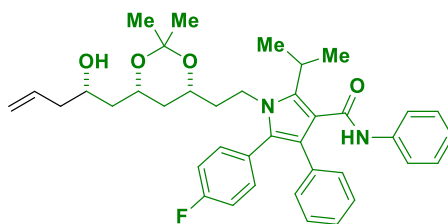

Alcohol **2q** (116.9 mg, 0.2 mmol) was subjected to standard reaction conditions (110 °C, 48 h. Upon flash column chromatography (SiO<sub>2</sub>: 10:90 EtOAc:hexanes) the title compound **3q** was isolated as a yellow oil in 80% yield (99.9 mg, 0.16 mmol, 11:1 dr).

**TLC (SiO<sub>2</sub>):** R<sub>f</sub> = 0.5 1:2 EtOAc:hexanes)

**<sup>1</sup>H NMR** (500 MHz, C<sub>6</sub>D<sub>6</sub>): δ 7.39 (d, J = 6.9 Hz, 2H), 7.23 (d, J = 7.4 Hz, 2H), 7.04 (dd, J = 8.4, 4.7 Hz, 4H), 6.91 (dt, J = 14.8, 6.9 Hz, 4H), 6.82 (t, J = 7.4 Hz, 1H), 6.70 (t, J = 8.5 Hz, 2H), 5.92 (ddt, J = 17.3, 10.3, 7.1 Hz, 1H), 5.14 – 5.03 (m, 2H), 4.04 (ddd, J = 15.0, 10.7, 4.8 Hz, 1H), 3.76 (tt, J = 10.5, 5.4 Hz, 2H), 3.66 (q, J = 7.3 Hz, 2H), 3.34 – 3.23 (m, 1H), 3.01 – 2.91 (m, 1H), 2.29 (dt, J = 13.6, 6.7 Hz, 1H), 2.19 (dt, J = 13.6, 6.5 Hz, 1H), 1.75 (d, 6H), 1.65 – 1.51 (m, 3H), 1.30 (dt, J = 4.4, 2.0 Hz, 1H), 1.27 (s, 3H), 1.11 (s, 3H), 0.85 (q, J = 11.8 Hz, 1H), 0.66 (dq, J = 13.5, 3.2 Hz, 1H).

**<sup>13</sup>C NMR** (130 MHz, C<sub>6</sub>D<sub>6</sub>): δ 163.6, 163.23 (d, J = 392.9 Hz), 141.7, 139.6, 135.5, 135.2, 133.60 (d, J = 8.1 Hz), 130.8, 129.0, 129.0, 129.0, 128.98 (d, J = 3.6 Hz), 126.8, 123.6, 122.5, 119.4, 117.3, 117.0, 115.69 (d, J = 21.4 Hz), 98.7, 70.1, 69.3, 66.7, 42.7, 42.6, 41.0, 38.5, 36.5, 30.1, 26.8, 22.2, 21.9, 19.8.

**<sup>19</sup>F NMR** (471 MHz, C<sub>6</sub>D<sub>6</sub>) δ: -113.45 (p, J = 7.0 Hz).

**HRMS** (Na<sup>+</sup>, *m/z*): for C<sub>39</sub>H<sub>45</sub>FN<sub>2</sub>O<sub>4</sub> : calcd. = 647.3312; found = 647.3300.

**FTIR** (neat): 2987, 2926, 1762, 1364, 1210, 1143, 1056, 986, 928, 873 cm<sup>-1</sup>.

**[α]<sub>D</sub><sup>24</sup>** = -31.5 (c = 2.1, CHCl<sub>3</sub>).

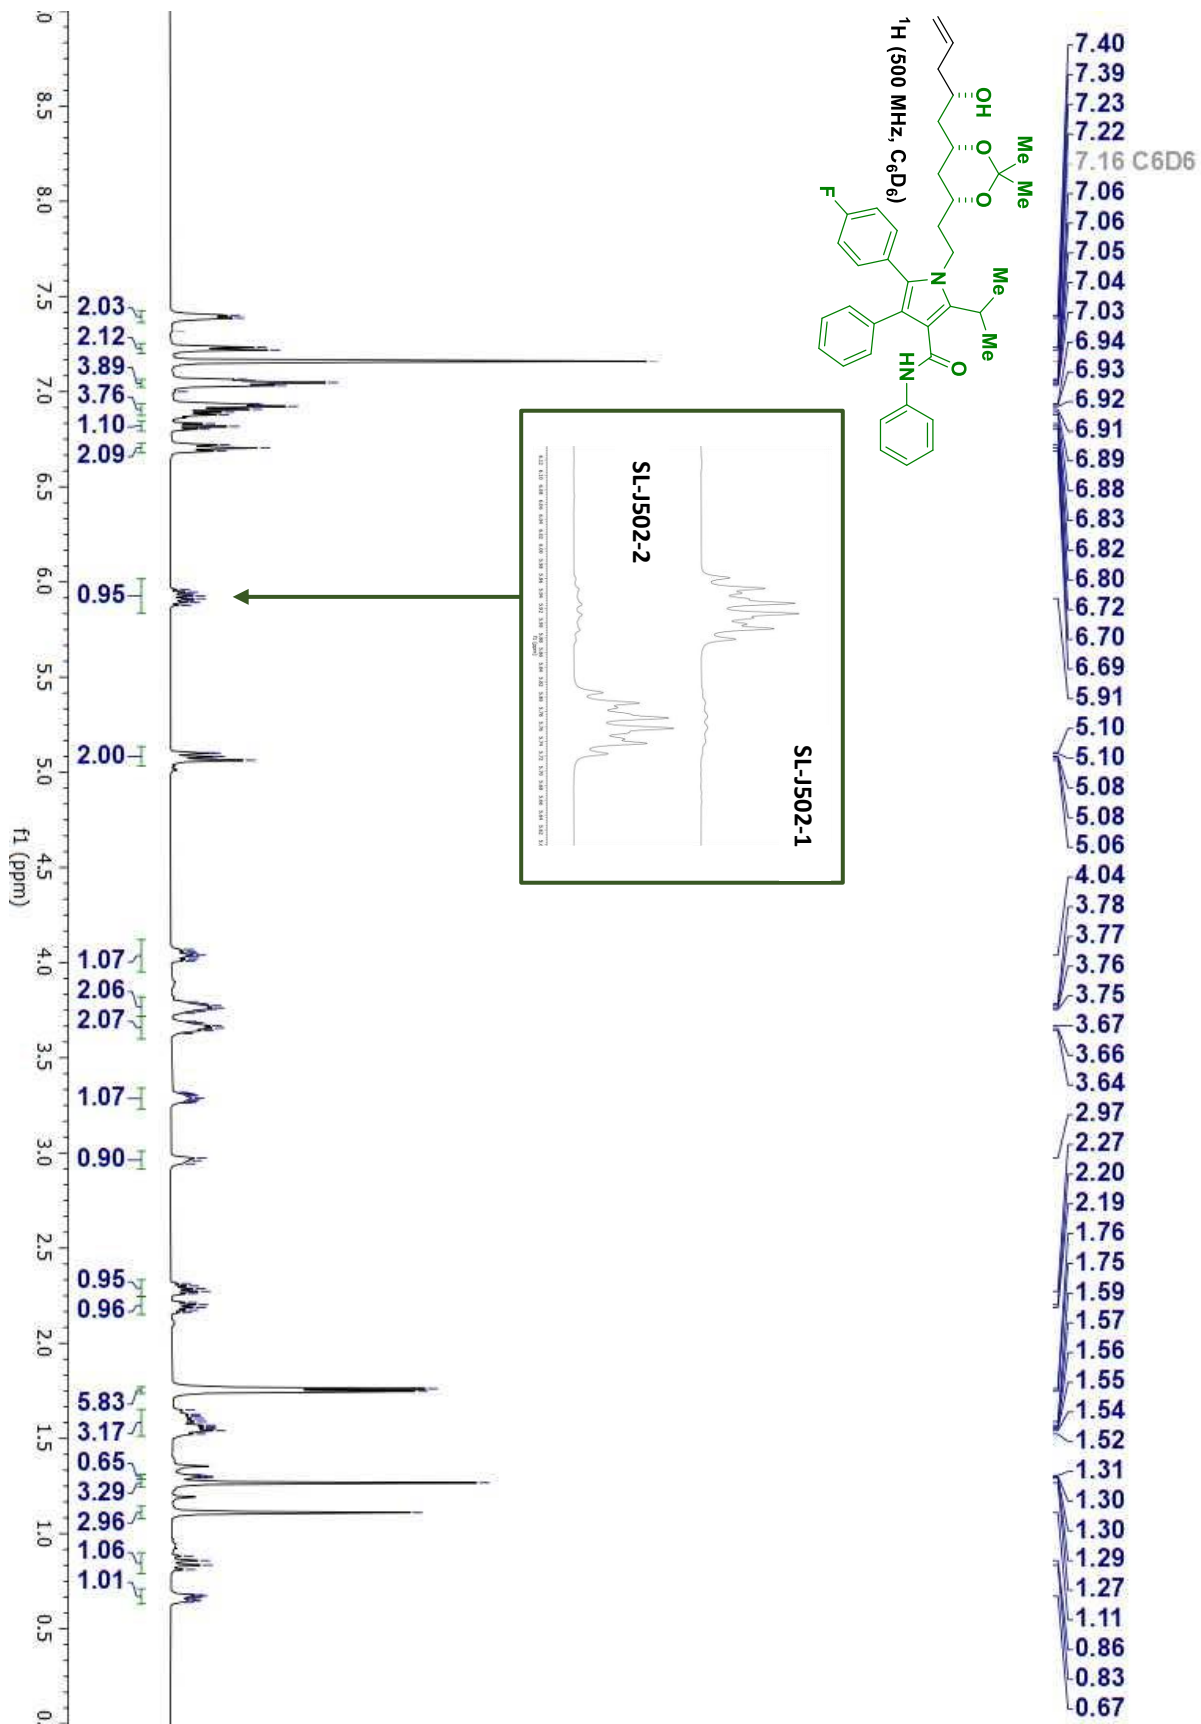

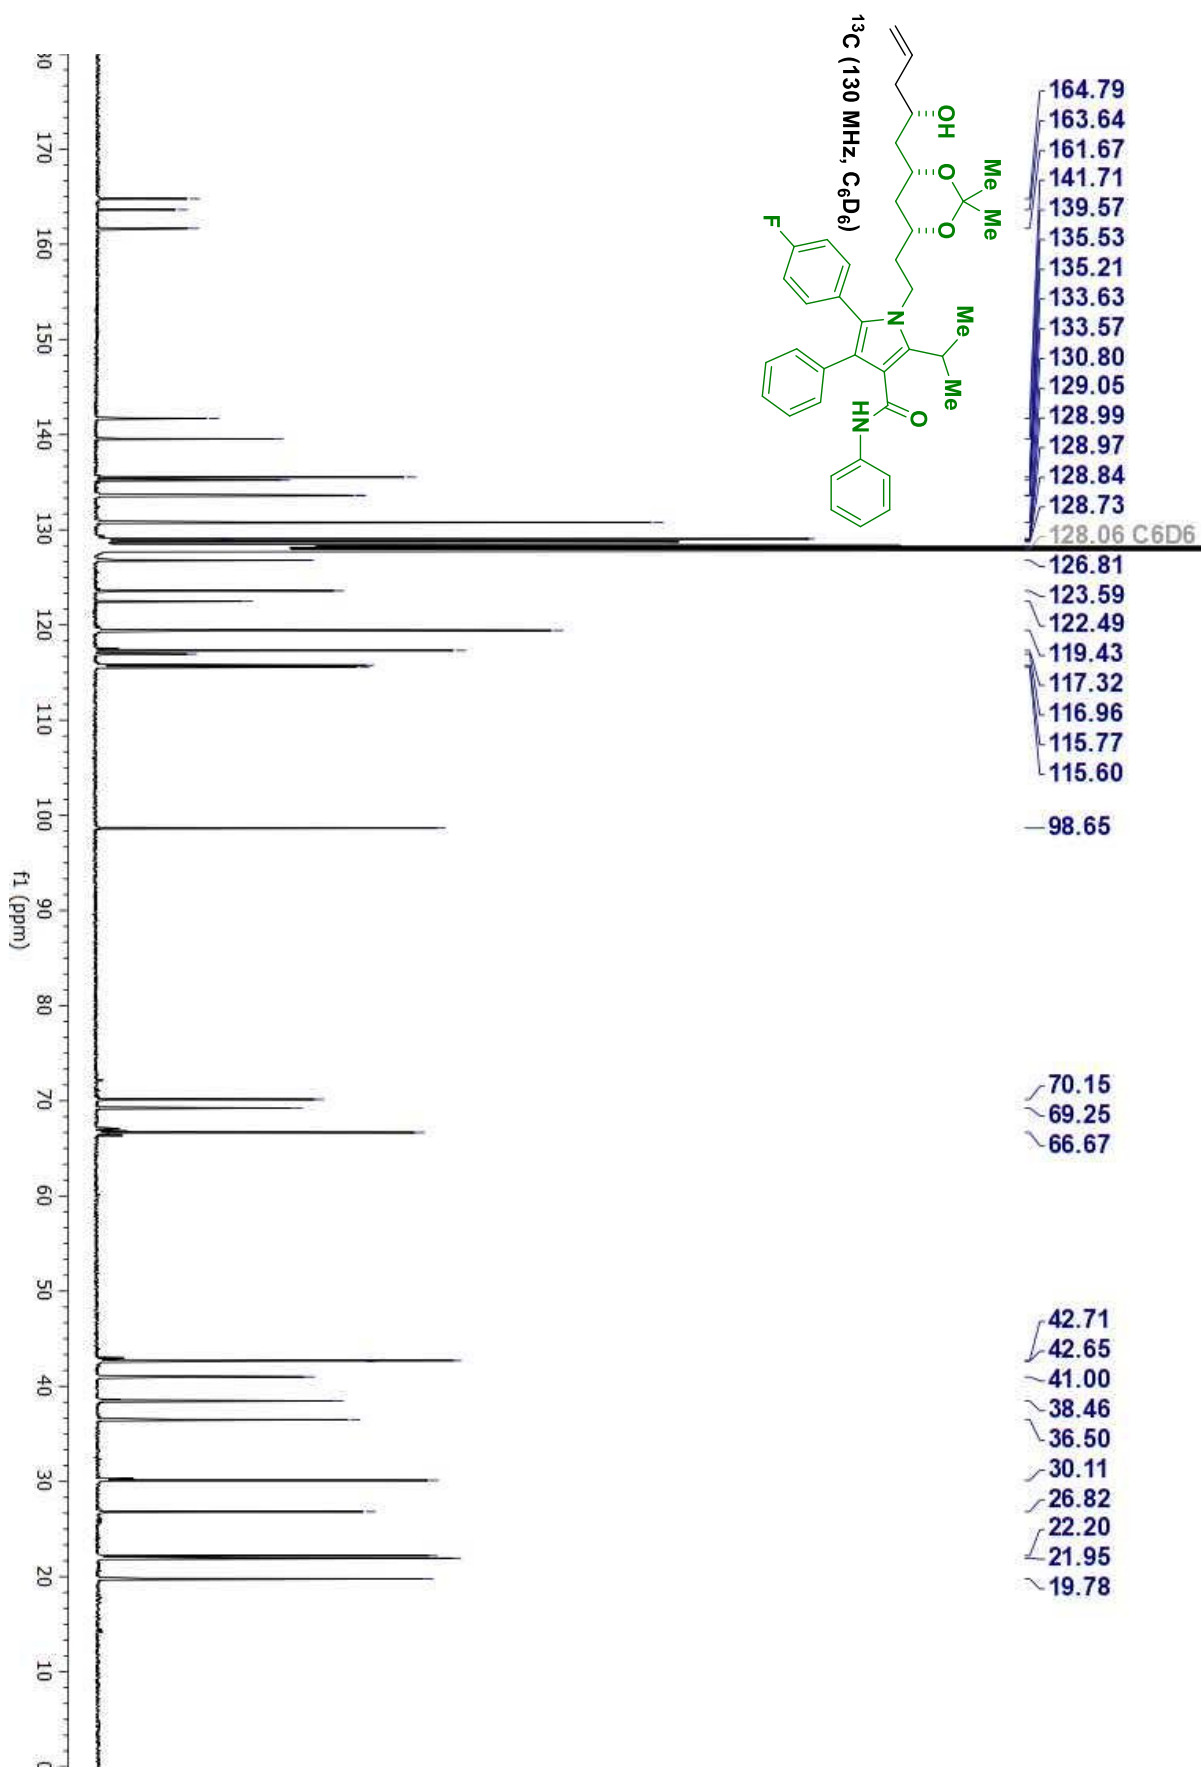



**5-(4-fluorophenyl)-1-(2-((4R,6S)-6-((S)-2-hydroxypent-4-en-1-yl)-2,2-dimethyl-1,3-dioxan-4-yl)ethyl)-2-isopropyl-N,4-diphenyl-1H-pyrrole-3-carboxamide (*epi-3q*)**

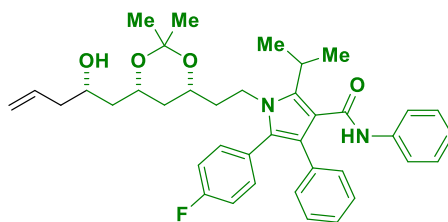

Alcohol **2q** (116.9 mg, 0.2 mmol) was subjected to standard reaction conditions (110 °C, 48 h. Upon flash column chromatography (SiO<sub>2</sub>: 10:90 EtOAc:hexanes) the title compound ***epi-3q*** was isolated as a yellow oil in 91% yield (113.7 mg, 0.16 mmol, 11:1 dr).

**TLC (SiO<sub>2</sub>):** R<sub>f</sub> = 0.5 (1:4 EtOAc:hexanes)

**<sup>1</sup>H NMR** (500 MHz, C<sub>6</sub>D<sub>6</sub>): δ 7.39 (d, J = 6.9 Hz, 2H), 7.23 (d, J = 7.4 Hz, 2H), 7.04 (dd, J = 8.4, 4.7 Hz, 4H), 6.91 (dt, J = 14.8, 6.9 Hz, 4H), 6.82 (t, J = 7.4 Hz, 1H), 6.70 (t, J = 8.5 Hz, 2H), 5.92 (ddt, J = 17.3, 10.3, 7.1 Hz, 1H), 5.14 – 5.03 (m, 2H), 4.04 (ddd, J = 15.0, 10.7, 4.8 Hz, 1H), 3.76 (tt, J = 10.5, 5.4 Hz, 2H), 3.66 (q, J = 7.3 Hz, 2H), 3.34 – 3.23 (m, 1H), 3.01 – 2.91 (m, 1H), 2.29 (dt, J = 13.6, 6.7 Hz, 1H), 2.19 (dt, J = 13.6, 6.5 Hz, 1H), 1.75 (d, 6H), 1.65 – 1.51 (m, 3H), 1.30 (dt, J = 4.4, 2.0 Hz, 1H), 1.27 (s, 3H), 1.11 (s, 3H), 0.85 (q, J = 11.8 Hz, 1H), 0.66 (dq, J = 13.5, 3.2 Hz, 1H).

**<sup>13</sup>C NMR** (130 MHz, C<sub>6</sub>D<sub>6</sub>): δ 163.6, 163.23 (d, J = 392.9 Hz), 141.7, 139.6, 135.5, 135.2, 133.60 (d, J = 8.1 Hz), 130.8, 129.0, 129.0, 129.0, 128.98 (d, J = 3.6 Hz), 126.8, 123.6, 122.5, 119.4, 117.3, 117.0, 115.69 (d, J = 21.4 Hz), 98.7, 70.1, 69.3, 66.7, 42.7, 42.6, 41.0, 38.5, 36.5, 30.1, 26.8, 22.2, 21.9, 19.8.

**<sup>19</sup>F NMR** (471 MHz, C<sub>6</sub>D<sub>6</sub>) δ: -113.45 (p, J = 7.0 Hz).

**HRMS** (Na<sup>+</sup>, *m/z*): for C<sub>39</sub>H<sub>45</sub>FN<sub>2</sub>O<sub>4</sub> : calcd. = 647.3312; found = 647.3300.

**FTIR** (neat): 2987, 2926, 1762, 1364, 1210, 1143, 1056, 986, 928, 873 cm<sup>-1</sup>.

[α]<sub>D</sub><sup>24</sup> = 15.2 (c = 2.1, CHCl<sub>3</sub>).

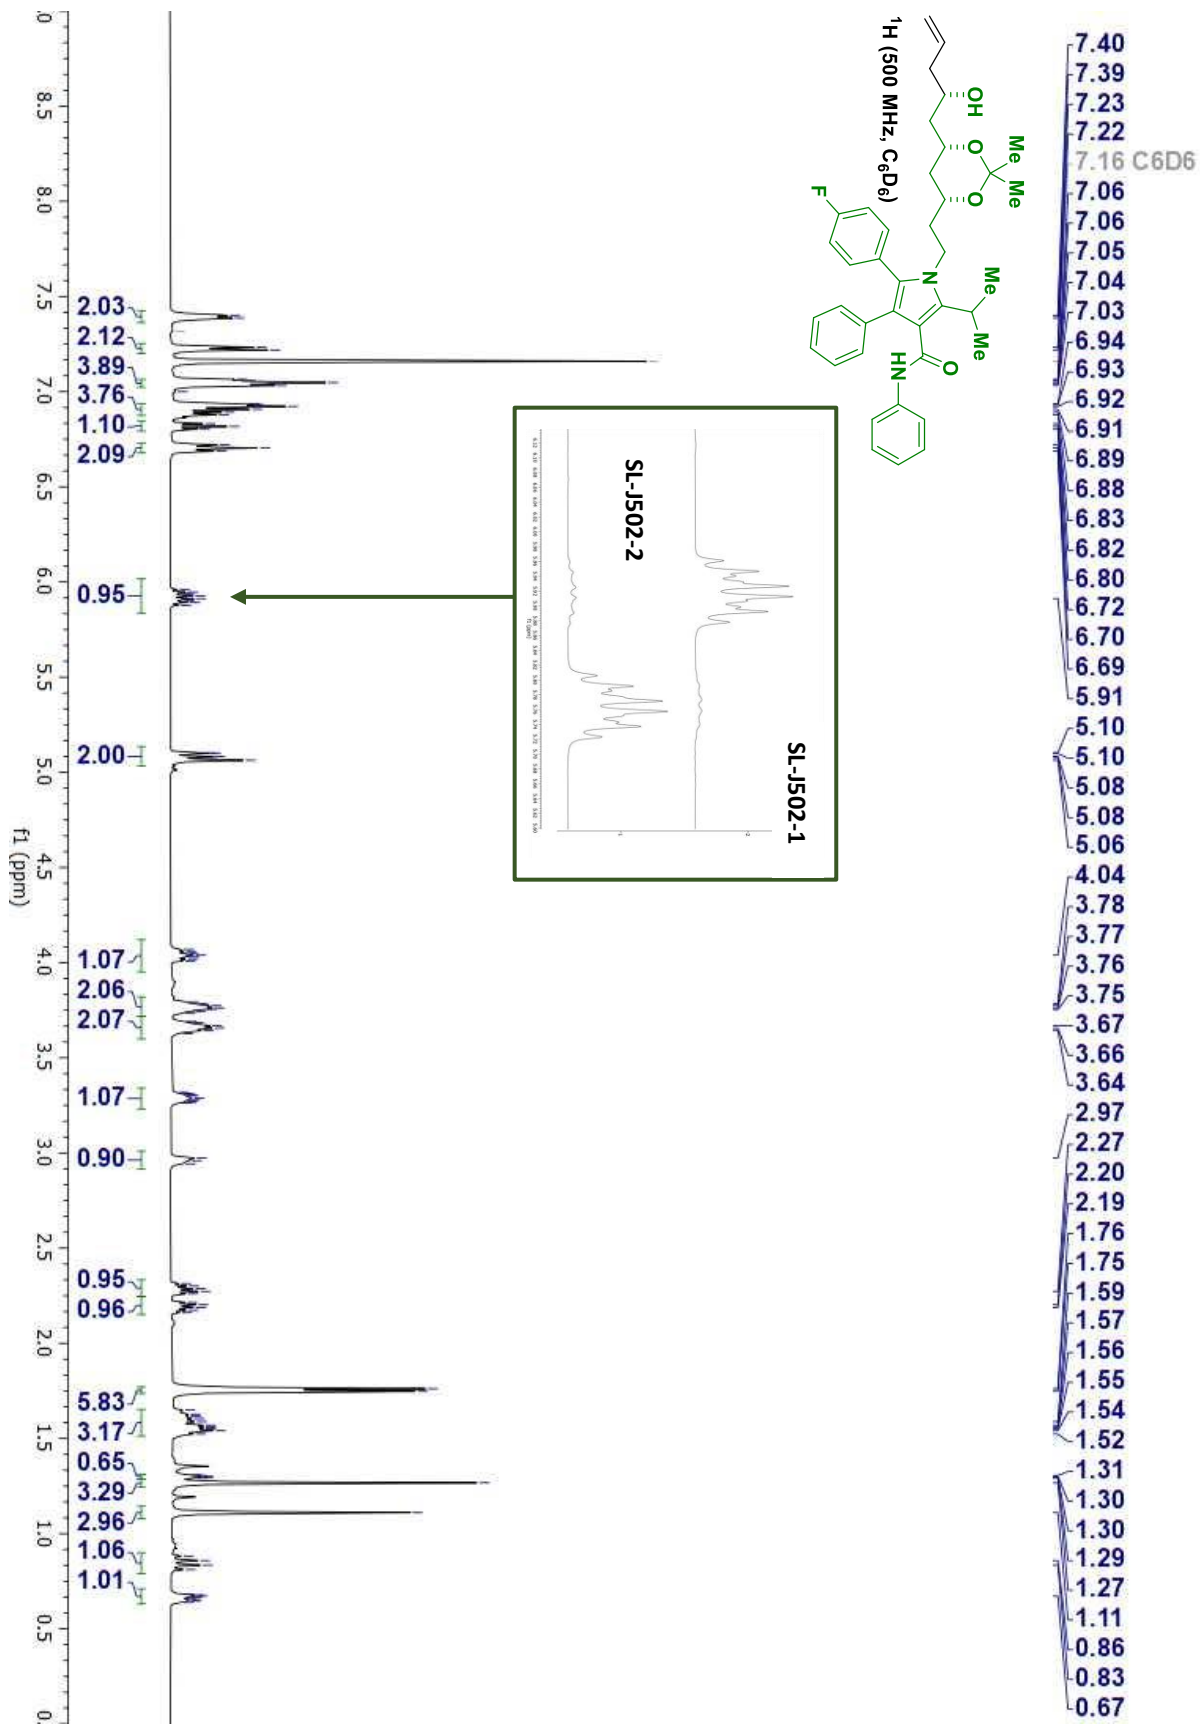



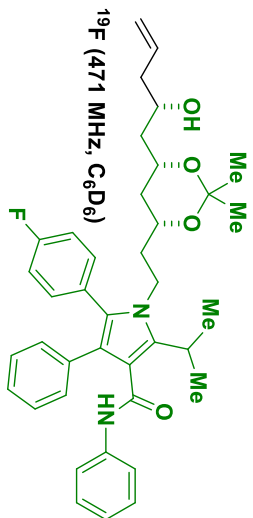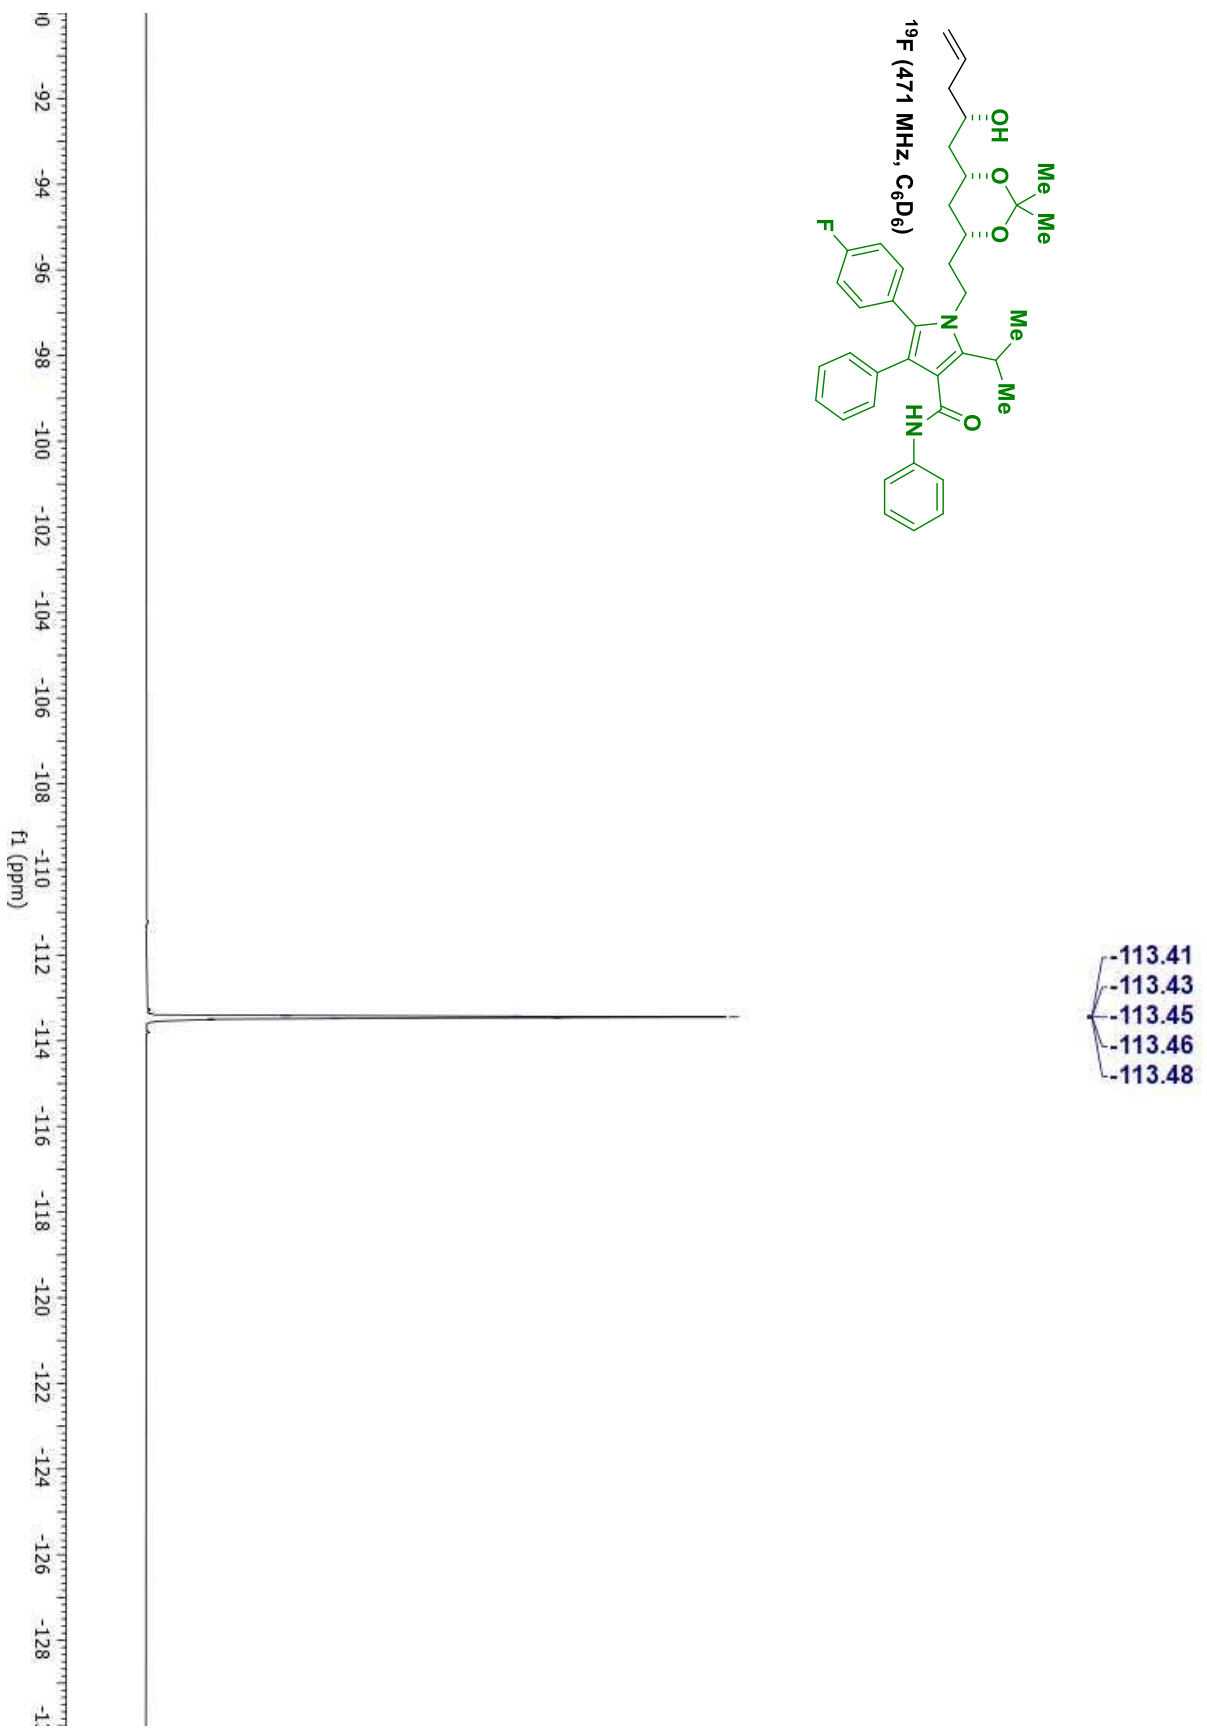



**(*S,E*)-7-((3*aS*,4*S*,7*S*,7*aR*)-7-(((2*S*,3*S*)-3-((2*S*,3*S*)-3-hydroxybutan-2-yl)oxiran-2-yl)methyl)-2,2-dimethyltetrahydro-4*H*-[1,3]dioxolo[4,5-*c*]pyran-4-yl)-6-methylhepta-1,5-dien-4-ol (3r)**

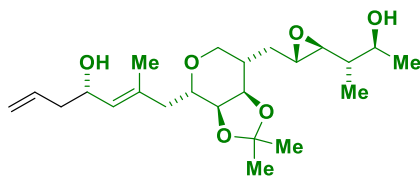

Alcohol **2r** (37.0 mg, 0.1 mmol) was subjected to standard reaction conditions (80 °C, 48 h) with **SL-J502-1** as ligand. Upon flash column chromatography (SiO<sub>2</sub>: 15:85 EtOAc:hexanes) the title compound **3r** was isolated as a yellow oil in 76% yield (31.2 mg, 0.08 mmol, >20:1 dr).

**TLC (SiO<sub>2</sub>):** R<sub>f</sub> = 0.5 (2:1 Acetone:hexanes)

**<sup>1</sup>H NMR** (500 MHz, C<sub>6</sub>D<sub>6</sub>): δ 5.90 (ddt, *J* = 17.2, 10.2, 7.1 Hz, 1H), 5.46 (d, *J* = 8.5 Hz, 1H), 5.17 – 4.97 (m, 2H), 4.42 (dt, *J* = 8.4, 6.5 Hz, 1H), 4.01 (dd, *J* = 5.1, 2.7 Hz, 1H), 3.81 (dd, *J* = 8.8, 5.1 Hz, 1H), 3.69 (td, *J* = 12.7, 12.2, 4.8 Hz, 2H), 3.55 (ddd, *J* = 12.3, 8.1, 3.2 Hz, 2H), 2.55 (td, *J* = 4.9, 2.5 Hz, 1H), 2.53 – 2.42 (m, 3H), 2.38 (dt, *J* = 14.0, 7.0 Hz, 1H), 2.32 – 2.14 (m, 3H), 2.00 (td, *J* = 6.9, 3.4 Hz, 1H), 1.71 (s, 3H), 1.48 (s, 3H), 1.46 – 1.38 (m, 2H), 1.33 (s, 3H), 1.23 (q, *J* = 7.1 Hz, 1H), 1.16 (d, *J* = 6.3 Hz, 3H), 0.75 (d, *J* = 7.0 Hz, 3H).

**<sup>13</sup>C NMR** (126 MHz, C<sub>6</sub>D<sub>6</sub>): δ 135.5, 134.6, 131.6, 117.1, 108.6, 77.3, 76.2, 74.3, 70.8, 68.0, 66.9, 61.0, 55.3, 43.2, 43.0, 42.7, 35.7, 34.3, 28.6, 26.6, 21.0, 17.3, 12.7.

**HRMS** (Na<sup>+</sup>, *m/z*): for C<sub>23</sub>H<sub>38</sub>O<sub>6</sub>: calcd. = 433.2561; found = 433.2557.

**FTIR** (neat): 3462, 3430, 1225, 1146, 1103, 1050, 834, 678 cm<sup>-1</sup>.

[α]<sub>D</sub><sup>24</sup> = -50.0 (c = 0.1, CHCl<sub>3</sub>).

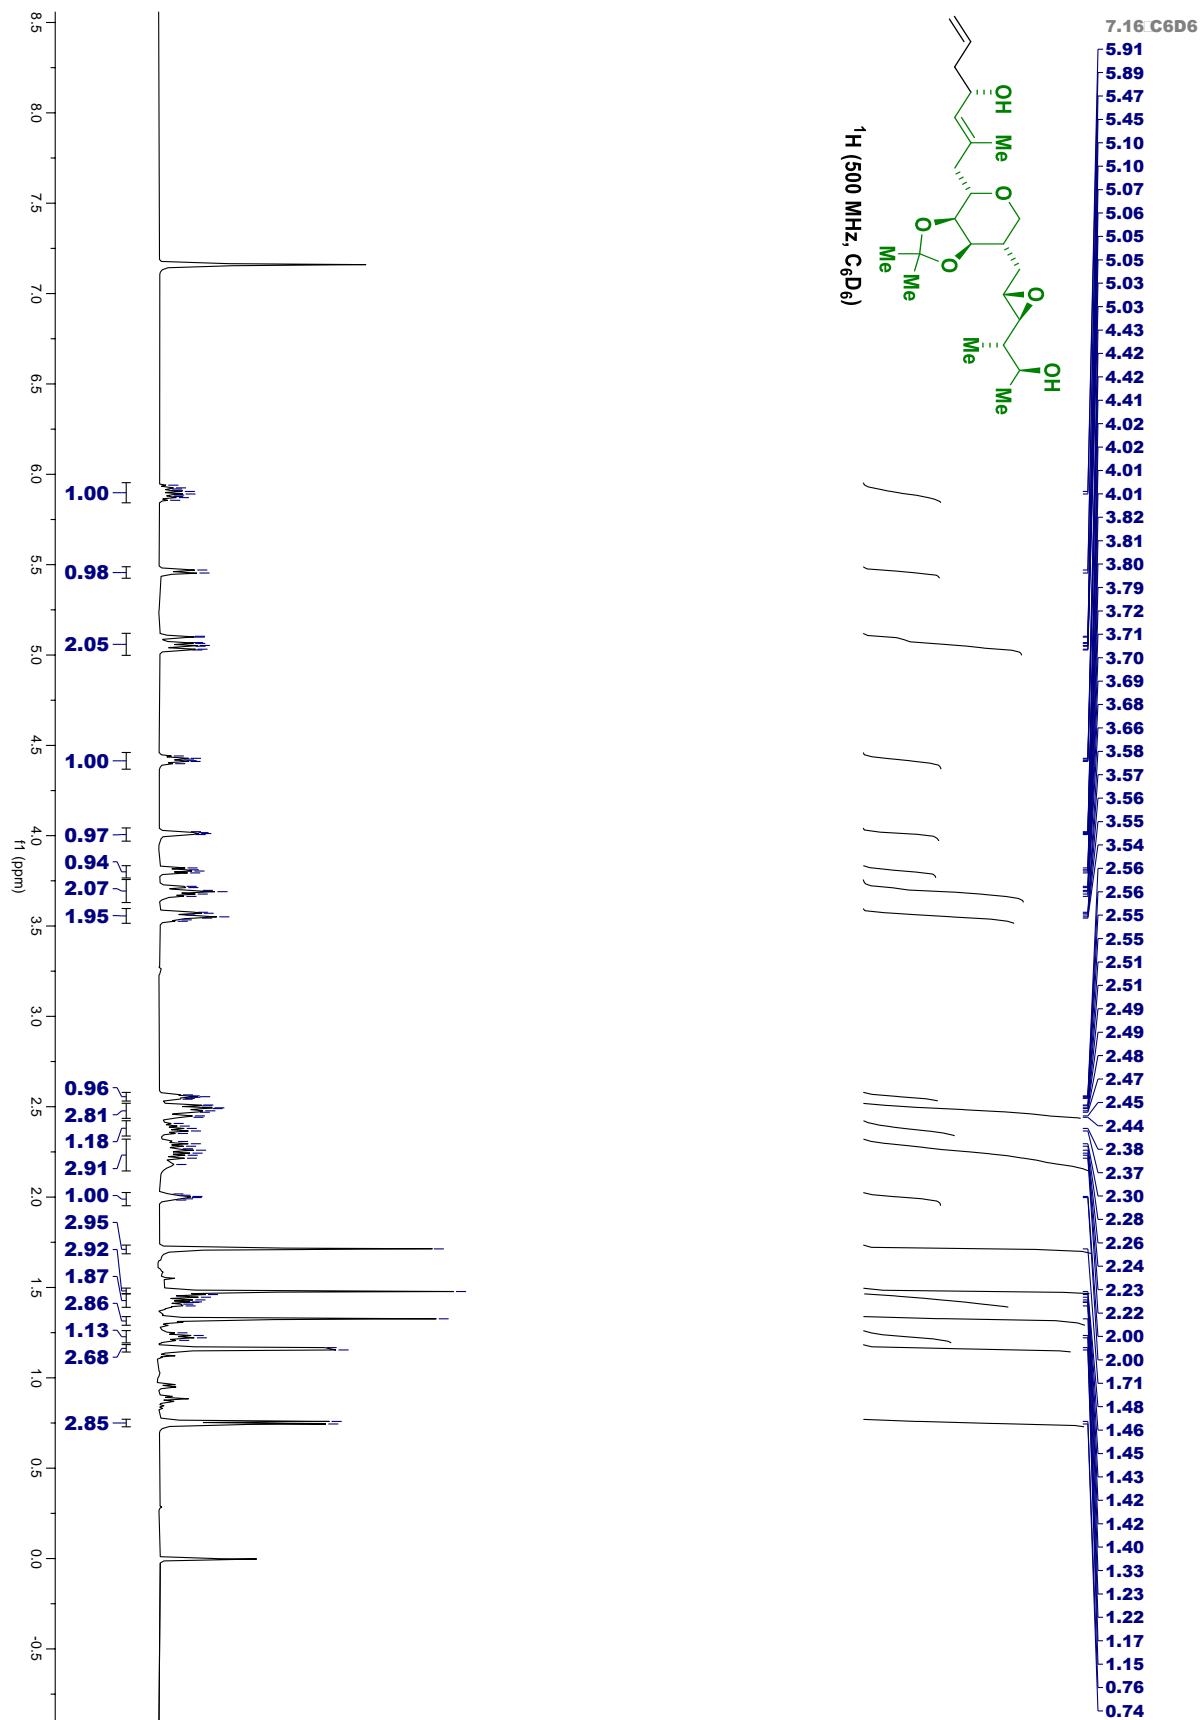

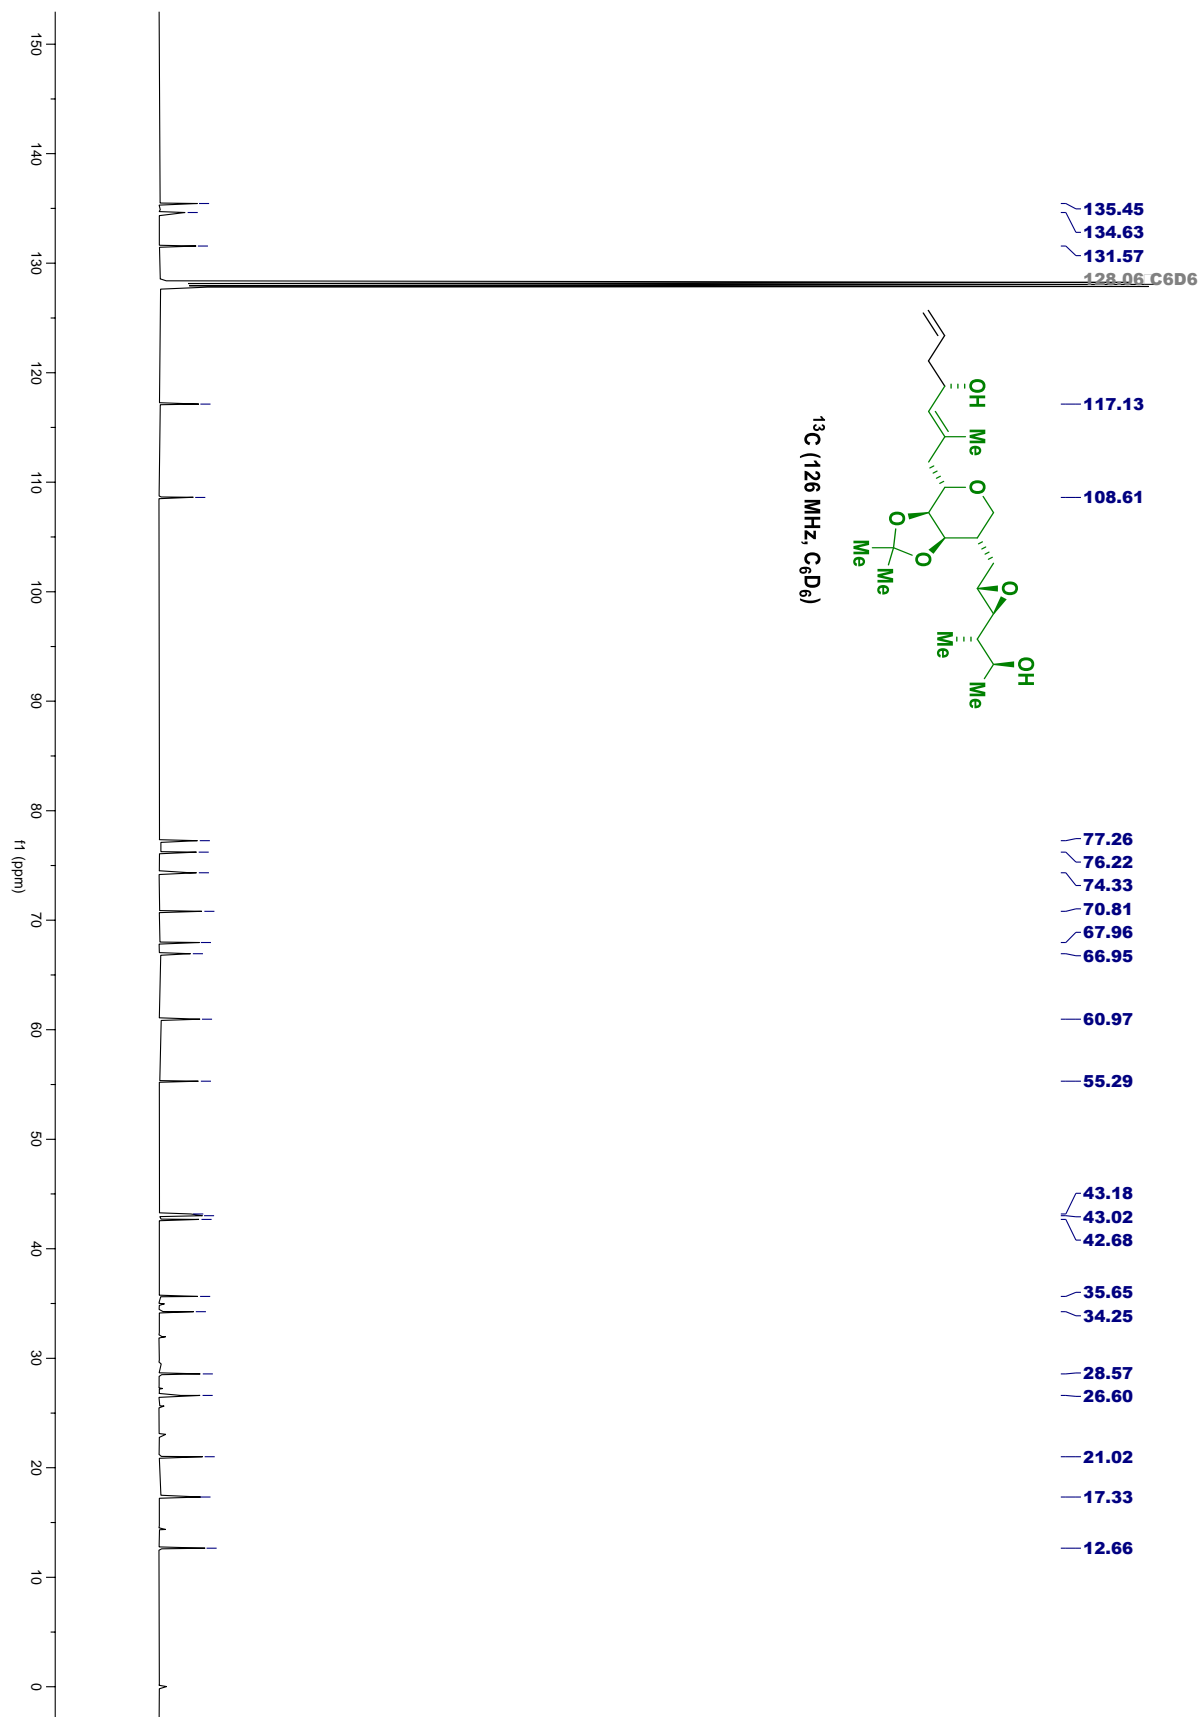

**(*R,E*)-7-((3*aS*,4*S*,7*S*,7*aR*)-7-(((2*S*,3*S*)-3-((2*S*,3*S*)-3-hydroxybutan-2-yl)oxiran-2-yl)methyl)-2,2-dimethyltetrahydro-4*H*-[1,3]dioxolo[4,5-*c*]pyran-4-yl)-6-methylhepta-1,5-dien-4-ol (*epi*-3r)**

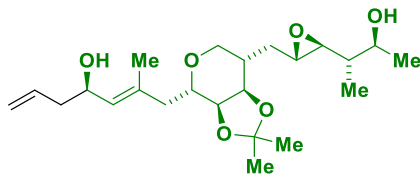

Alcohol **2r** (37.0 mg, 0.1 mmol) was subjected to standard reaction conditions (75 °C, 48 h) with **SL-J502-1** as ligand. Upon flash column chromatography (SiO<sub>2</sub>: 3:17 EtOAc:hexanes) the title compound **epi-3r** was isolated as a yellow oil in 82% yield (33.8 mg, 0.08 mmol, >20:1 dr).

**TLC (SiO<sub>2</sub>):** R<sub>f</sub> = 0.5 (2:1 acetone:hexanes)

**<sup>1</sup>H NMR** (500 MHz, C<sub>6</sub>D<sub>6</sub>): δ 5.90 (ddt, *J* = 17.2, 10.2, 7.1 Hz, 1H), 5.55 – 5.38 (m, 1H), 5.19 – 4.91 (m, 2H), 4.43 (dt, *J* = 8.5, 6.4 Hz, 1H), 3.99 (dd, *J* = 5.2, 2.8 Hz, 1H), 3.84 – 3.63 (m, 3H), 3.63 – 3.45 (m, 2H), 2.64 – 2.46 (m, 2H), 2.40 (m, 3H), 2.28 (m, 2H), 2.00 (dd, *J* = 6.6, 3.7 Hz, 1H), 1.71 (d, *J* = 1.4 Hz, 3H), 1.58 – 1.48 (m, 1H), 1.46 (s, 3H), 1.43 – 1.33 (m, 2H), 1.31 (s, 3H), 1.22 (q, *J* = 7.0 Hz, 1H), 1.16 (d, *J* = 6.3 Hz, 3H), 0.75 (d, *J* = 7.0 Hz, 3H).

**<sup>13</sup>C NMR** (126 MHz, C<sub>6</sub>D<sub>6</sub>): δ 135.4, 134.8, 131.1, 117.2, 108.7, 77.1, 76.2, 74.8, 70.8, 68.0, 66.8, 60.8, 55.3, 43.6, 42.9, 42.7, 35.7, 34.0, 28.5, 26.6, 21.0, 17.5, 12.6.

**HRMS** (Na<sup>+</sup>, *m/z*): for C<sub>23</sub>H<sub>38</sub>O<sub>6</sub>: calcd. = 433.2561; found = 433.2555.

**FTIR** (neat): 3462, 3430, 1225, 1146, 1103, 1050, 834, 678 cm<sup>-1</sup>.

[α]<sub>D</sub><sup>24</sup> = -25.0 (c = 0.1, CHCl<sub>3</sub>).

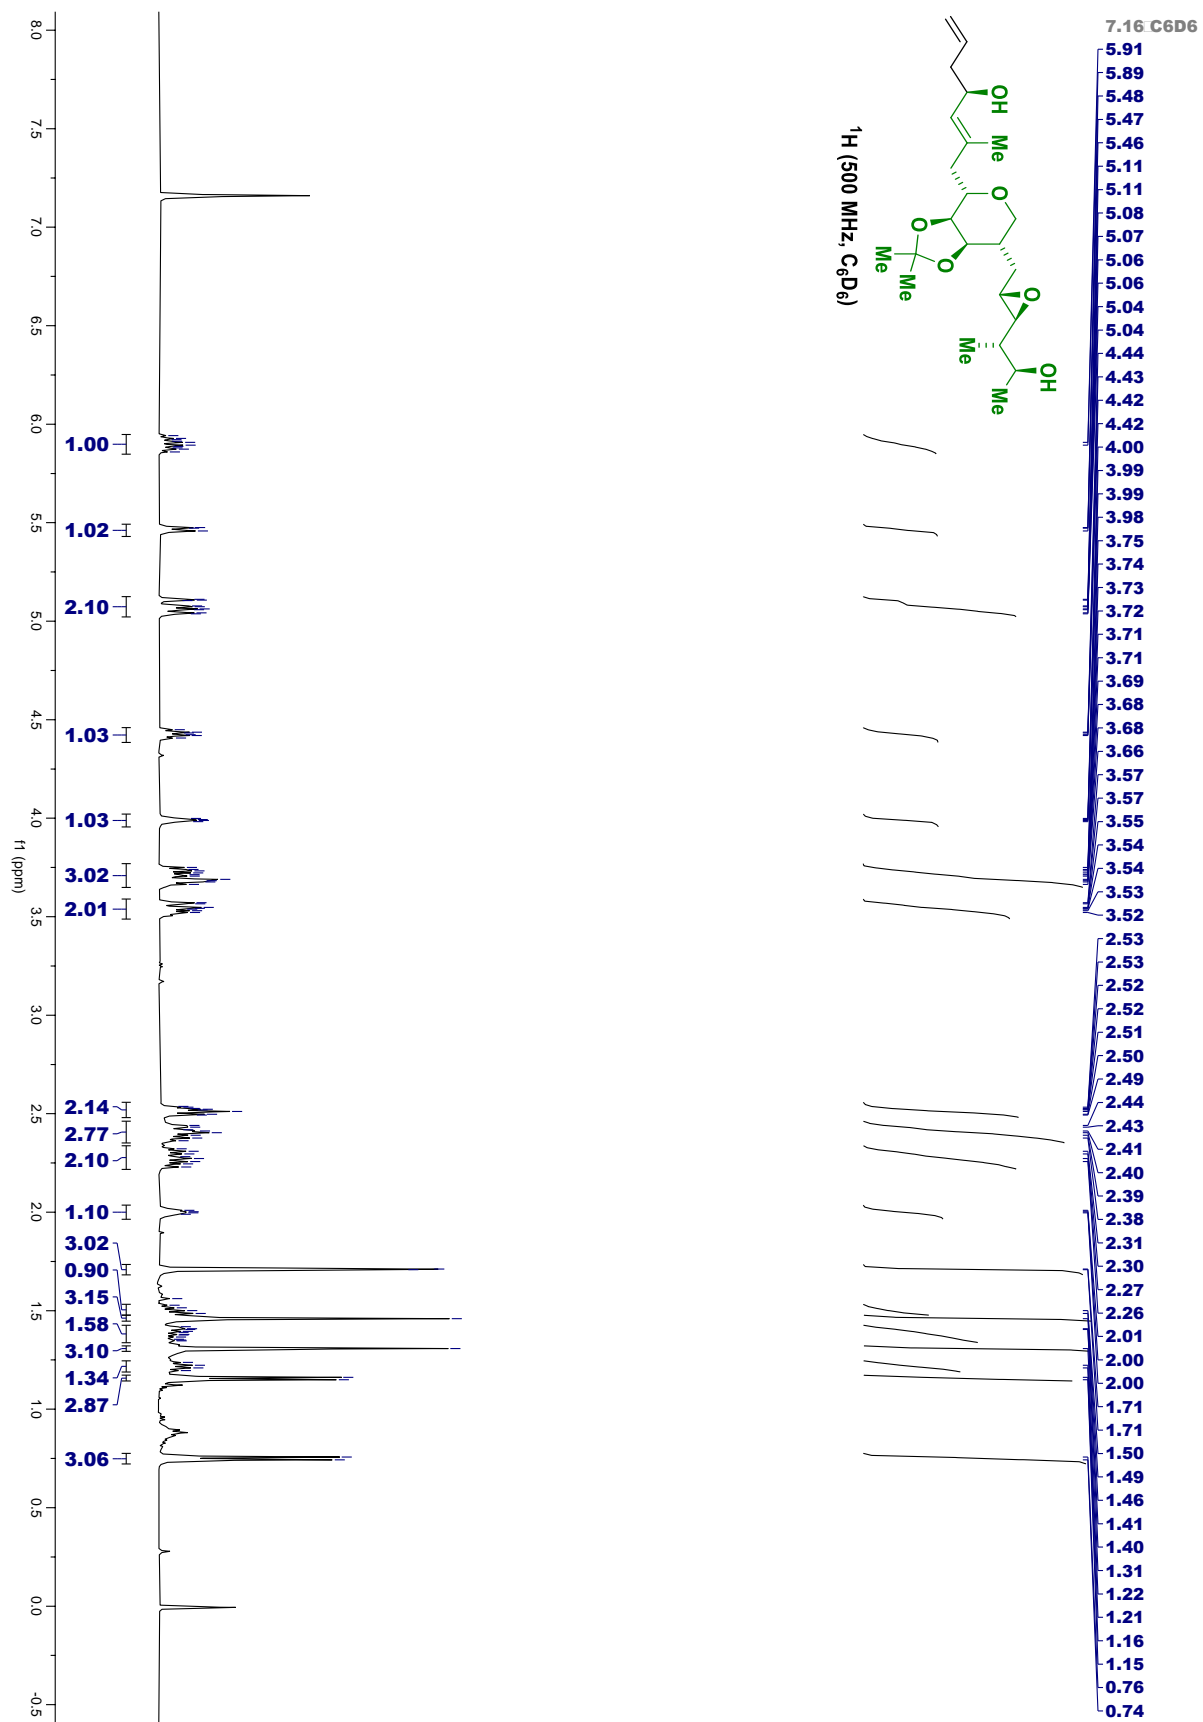

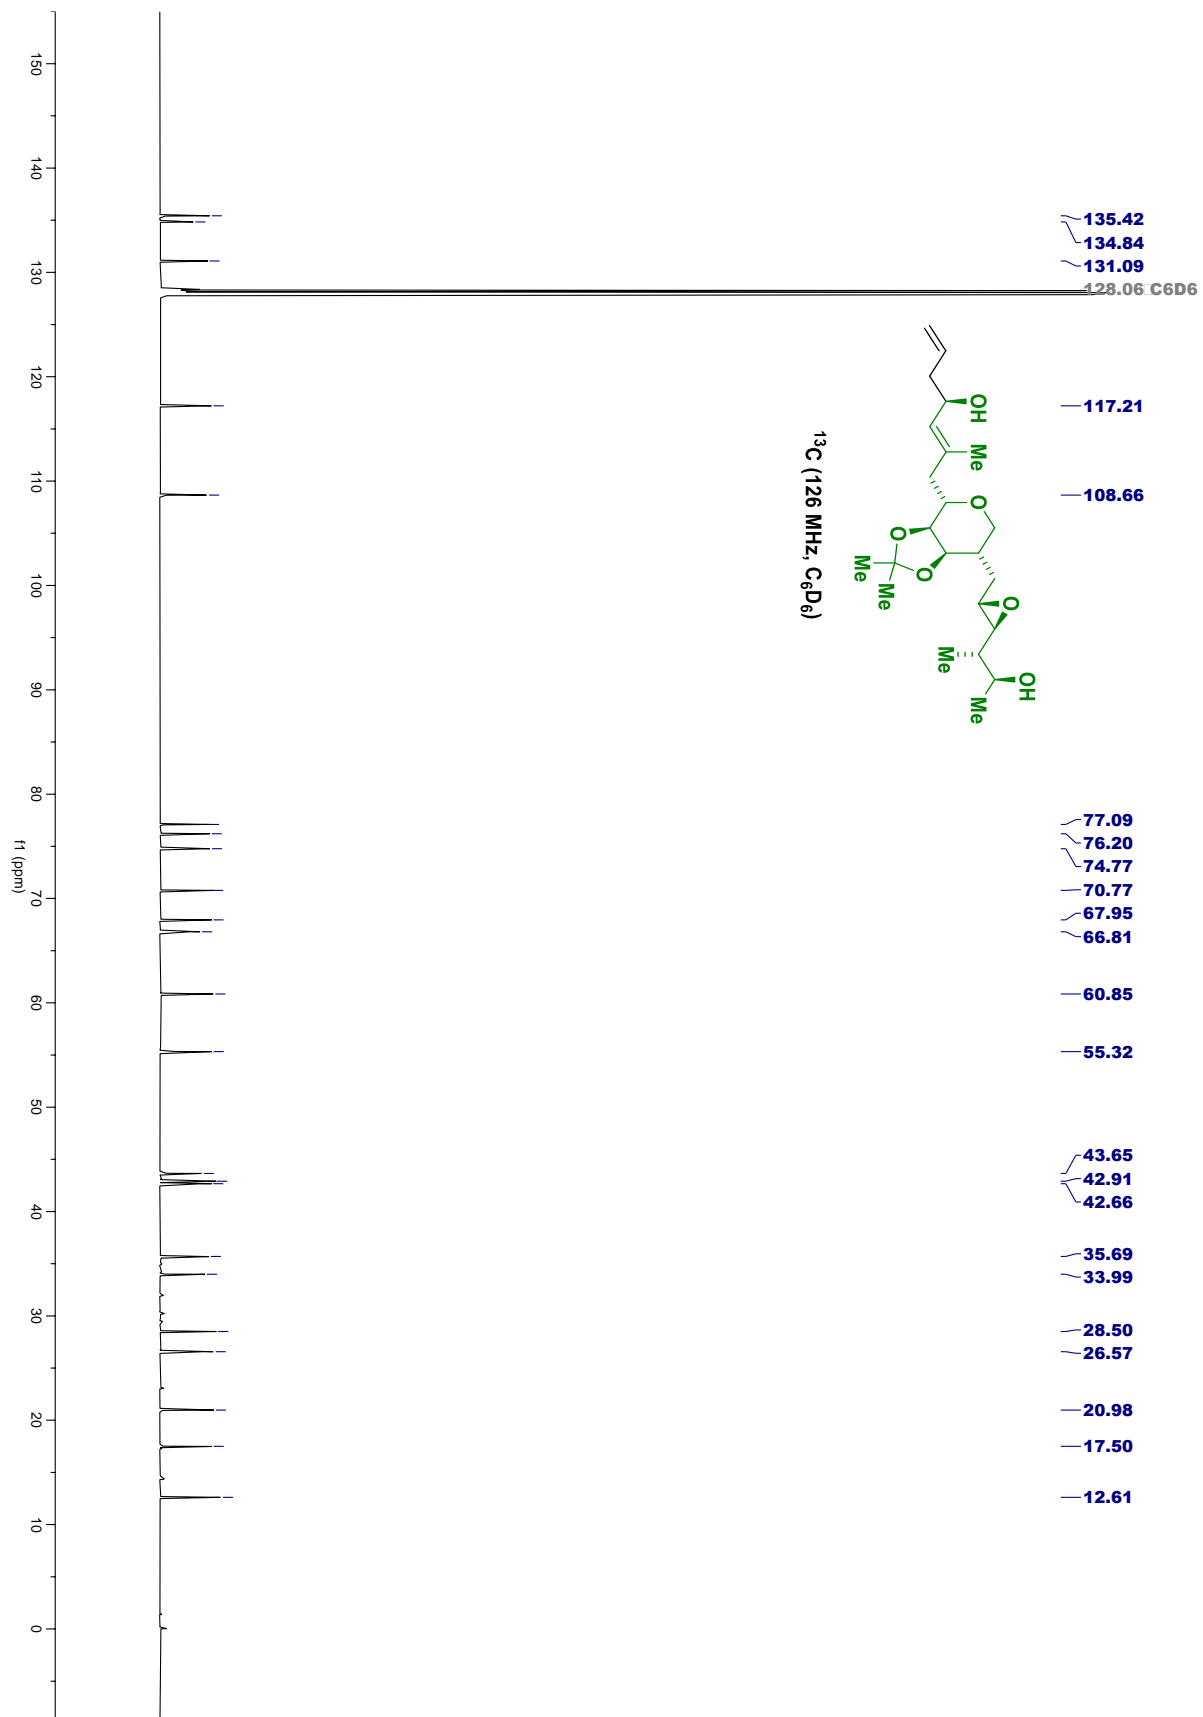

## Deuterium Labeling Study

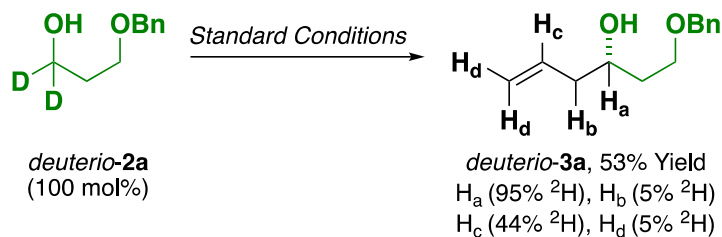

Alcohol *deuterio-2a* (33.6 mg, 0.2 mmol) was subjected to standard reaction conditions (110 °C, 48 h) with **SL-J502-1** as ligand. Upon flash column chromatography (SiO<sub>2</sub>: 5:95 EtOAc:hexanes) the title compound *deuterio-3a* was isolated as a yellow oil in 53% yield (22.9 mg, 0.11 mmol).

<sup>1</sup>H NMR (400 MHz, CDCl<sub>3</sub>): δ 7.39 – 7.26 (m, 5H), 5.84 (ddt, *J* = 17.4, 10.4, 7.1 Hz, 0.55H), 5.16 – 5.05 (m, 1.93H), 4.53 (s, 2H), 3.92 – 3.81 (m, 0.05H), 3.72 (dt, *J* = 9.3, 5.4 Hz, 1H), 3.65 (ddd, *J* = 9.4, 7.1, 5.4 Hz, 1H), 2.76 (s, 1H), 2.25 (d, *J* = 5.9 Hz, 1.95H), 1.77 (t, *J* = 5.4 Hz, 2H).

<sup>2</sup>H NMR (92 MHz, CDCl<sub>3</sub>): δ 5.88 (s, 1H), 5.15 (s, 0H), 3.87 (s, 2H), 2.25 (s, 0H).

HRMS (Na<sup>+</sup>, *m/z*): for C<sub>13</sub>H<sub>17</sub>DO<sub>2</sub>: calcd. = 230.1262; found = 230.1262.  
(Na<sup>+</sup>, *m/z*): for C<sub>13</sub>H<sub>16</sub>D<sub>2</sub>O<sub>2</sub>: calcd. = 231.1296; found = 231.1321.  
(Na<sup>+</sup>, *m/z*): for C<sub>13</sub>H<sub>15</sub>D<sub>3</sub>O<sub>2</sub>: calcd. = 232.1322; found = 232.1356.  
(Na<sup>+</sup>, *m/z*): for C<sub>13</sub>H<sub>14</sub>D<sub>4</sub>O<sub>2</sub>: calcd. = 233.1348; found = 233.1379.  
(Na<sup>+</sup>, *m/z*): for C<sub>13</sub>H<sub>13</sub>D<sub>5</sub>O<sub>2</sub>: calcd. = 234.1375; found = 234.1396.

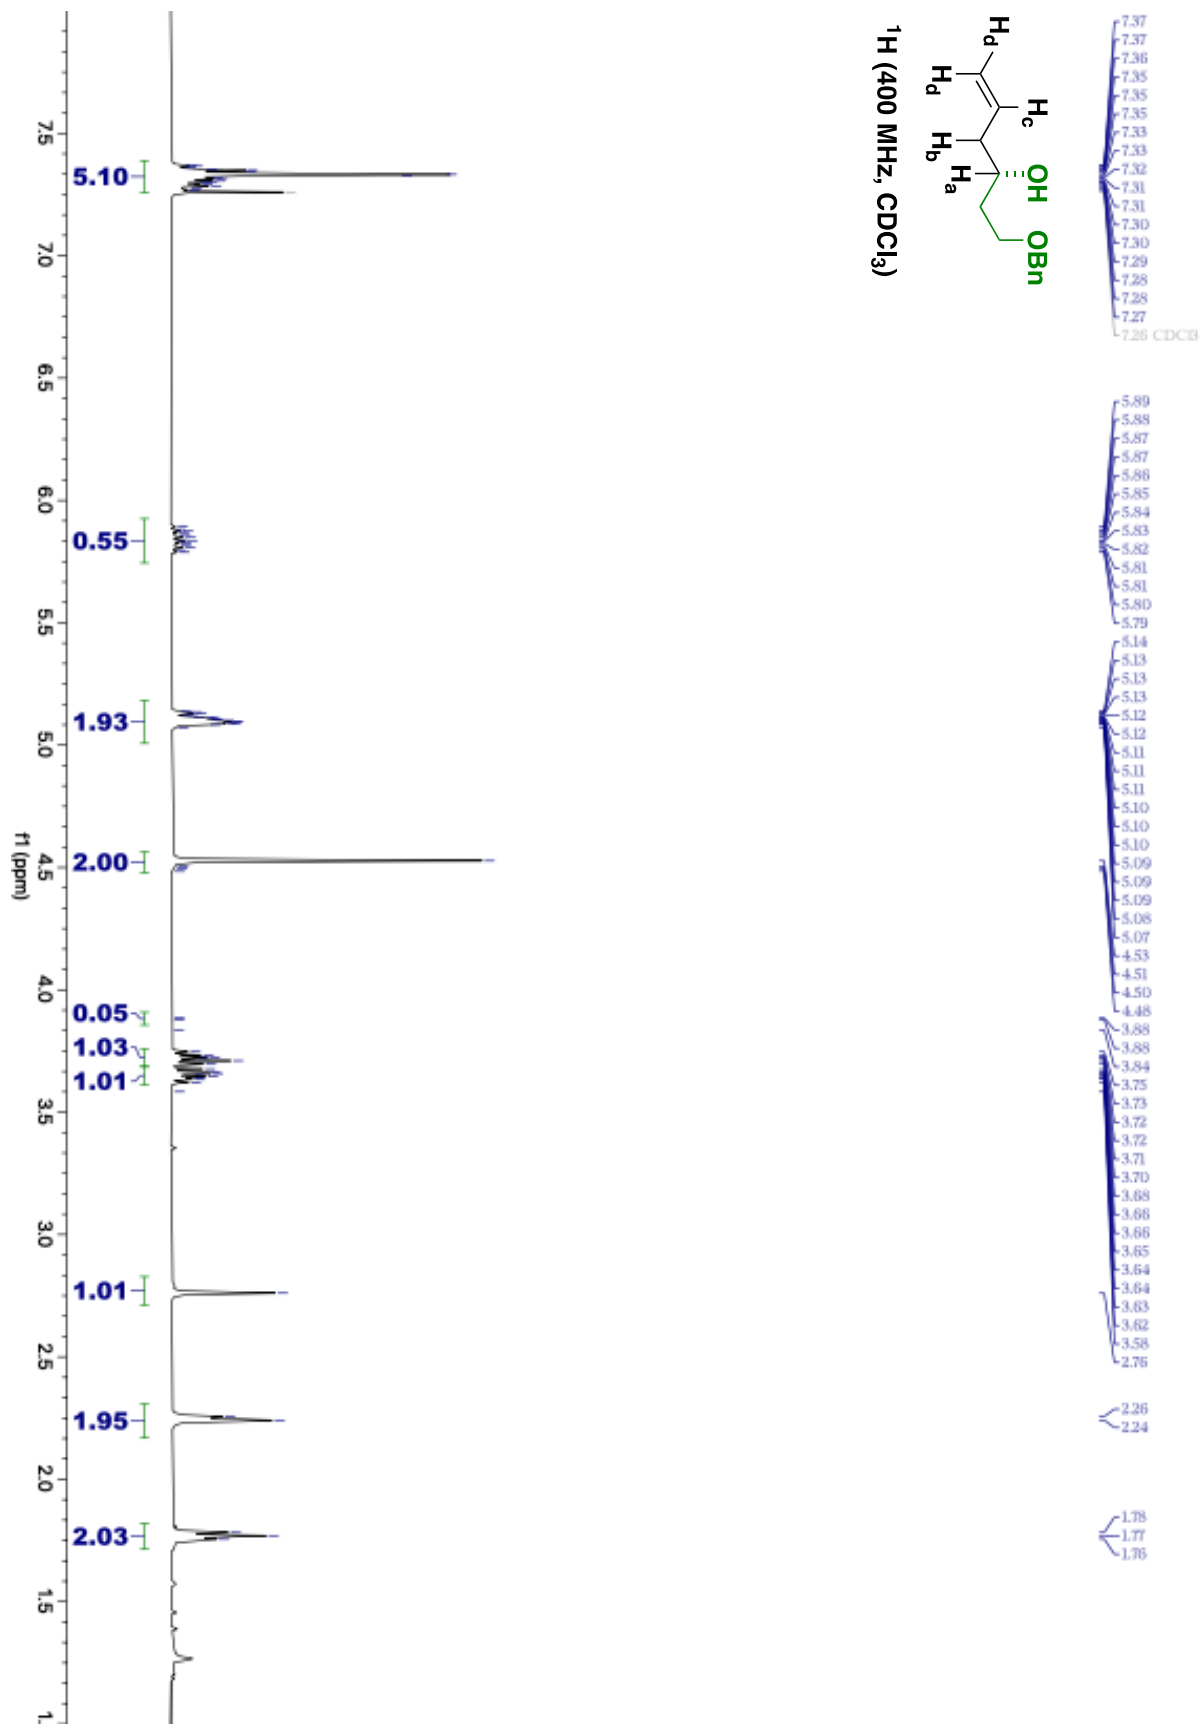



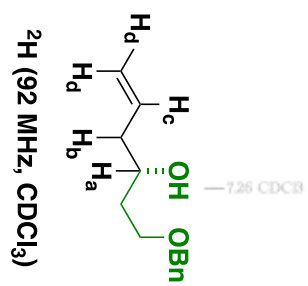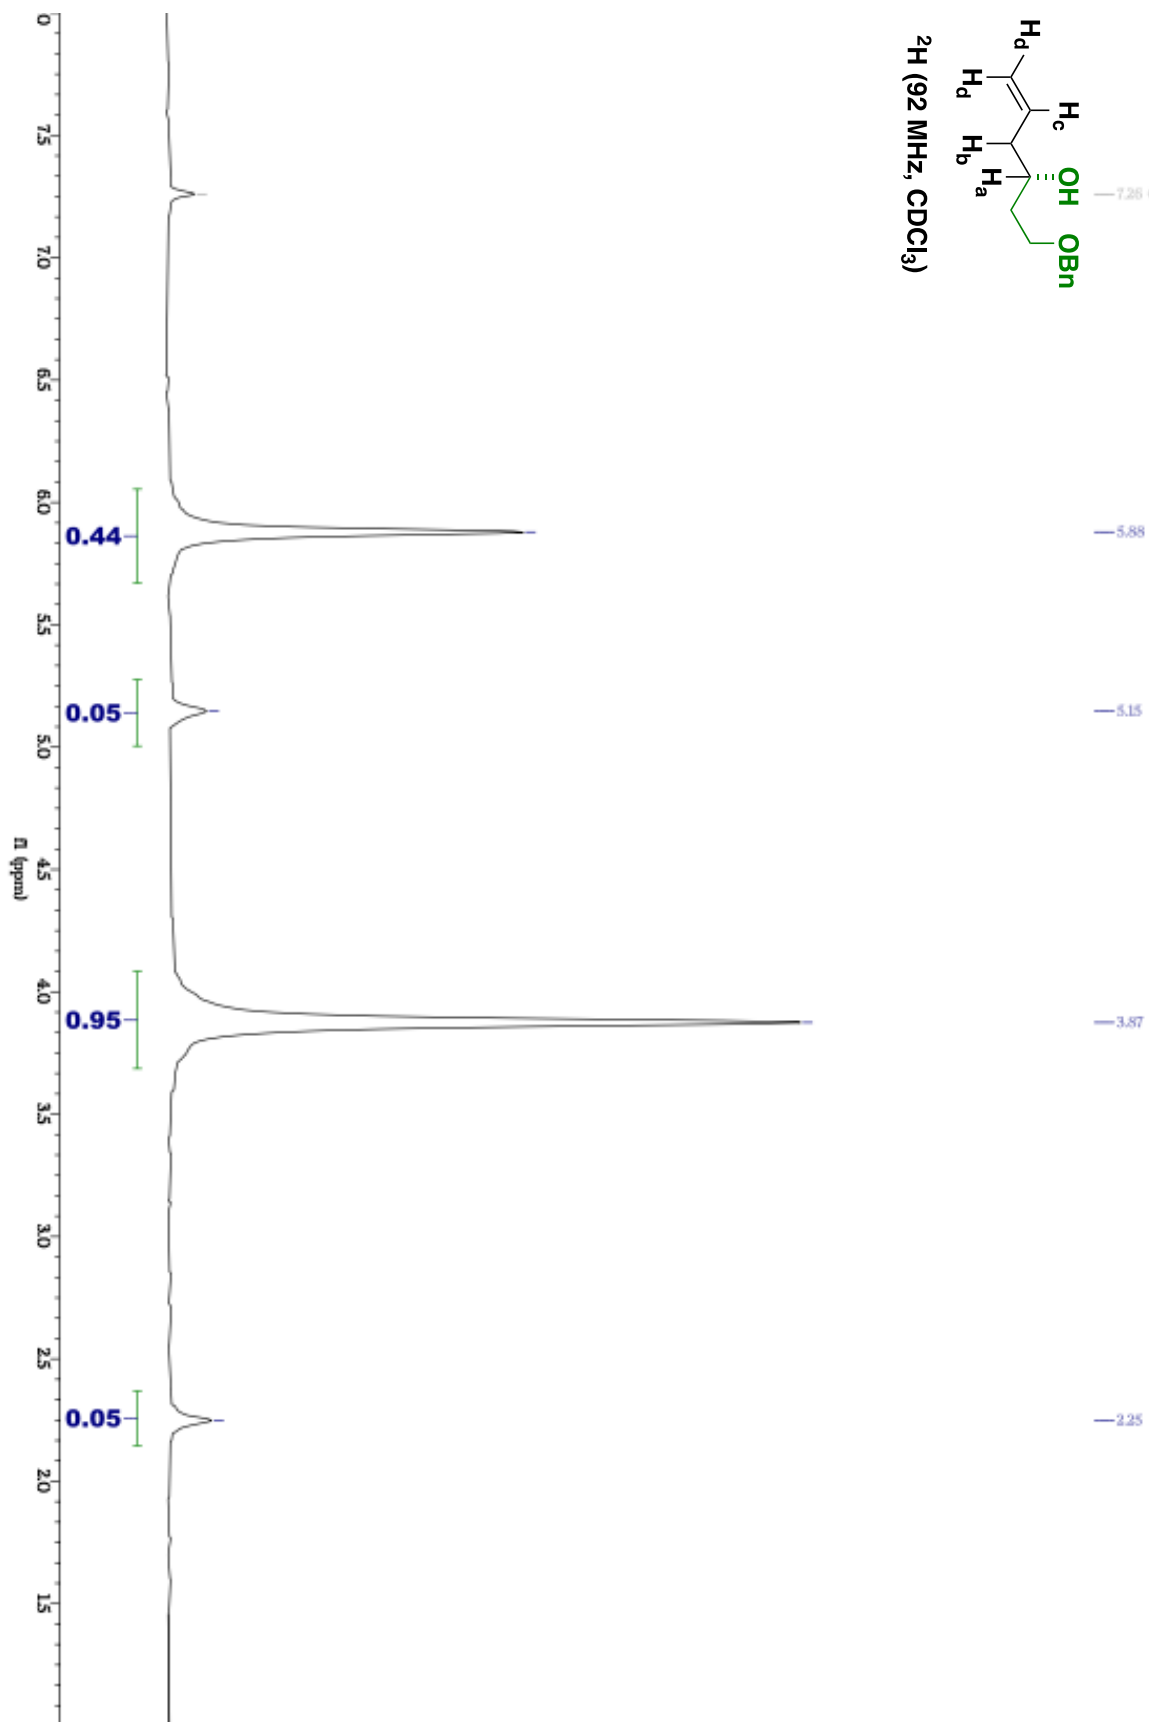

## Synthesis of **3g**-(3,5-dinitrobenzoate)

(S)-1-(1-(4-chlorobenzoyl)-5-methoxy-2-methyl-1*H*-indol-3-yl)pent-4-en-2-yl 3,5-dinitrobenzoate

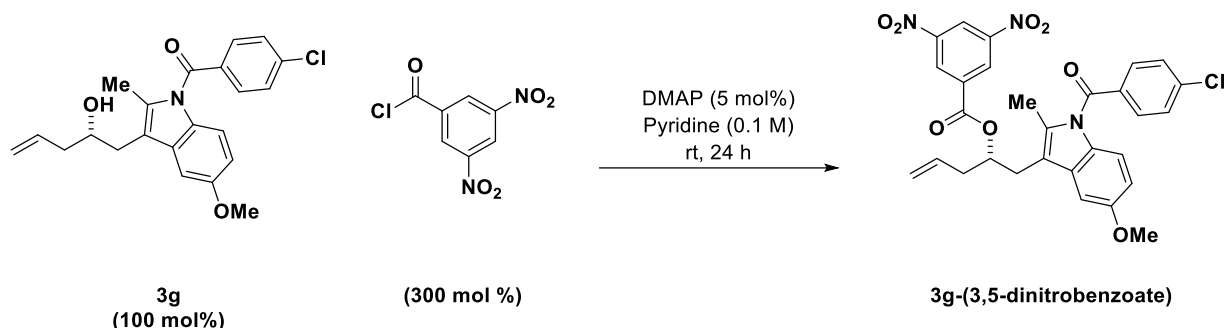

To a 25 mL round-bottomed flask equipped with a magnetic stir bar under an argon atmosphere were added **3g** (20 mg, 0.05 mmol, 100 mol%), 3,5-dinitrobenzoyl chloride (42 mg, 0.15 mmol, 300 mol%), and DMAP (1 mg, 0.003 mmol, 5 mol%). Pyridine (5 mL, 0.01 M) was added via syringe. The reaction mixture was allowed to stir at room temperature for 24 hours. The reaction was quenched with aqueous  $\text{NH}_4\text{Cl}$  (saturated, 10 mL) in a 25 mL separatory funnel. The separated organic layer was washed with aqueous  $\text{NaCl}$  (saturated, 10 mL) before drying with  $\text{Na}_2\text{SO}_4$ . The solvent was concentrated *in vacuo* and the resulting oil was subjected to flash chromatography ( $\text{SiO}_2$ : 2:98 EtOAc/Hexanes) to furnish the title compound **3g**-(3,5-dinitrobenzoate) as a yellow crystalline solid in 34% yield (10 mg, 0.017 mmol).

**TLC** ( $\text{SiO}_2$ ):  $R_f = 0.6$  (1:4 EtOAc:Hexanes)

**$^1\text{H}$  NMR** (400 MHz,  $\text{CDCl}_3$ ):  $\delta$  9.19 (t,  $J = 2.2$  Hz, 1H), 9.03 (d,  $J = 2.1$  Hz, 2H), 7.68 – 7.58 (m, 3H), 7.47 (dd,  $J = 8.3, 1.6$  Hz, 3H), 7.04 (d,  $J = 2.5$  Hz, 1H), 6.79 (d,  $J = 9.0$  Hz, 1H), 6.60 (dd,  $J = 9.0, 2.5$  Hz, 1H), 5.86 (ddt,  $J = 17.1, 10.2, 6.9$  Hz, 1H), 5.24 – 5.12 (m, 3H), 3.82 (d,  $J = 14.5$  Hz, 3H), 2.61 (t,  $J = 6.6$  Hz, 2H), 2.42 (s, 3H).

**$^{13}\text{C}$  NMR** (101 MHz,  $\text{CDCl}_3$ ):  $\delta$  168.4, 156.1, 148.8, 132.9, 131.3, 131.0, 129.4, 129.3, 122.4, 119.1, 115.1, 111.2, 101.9, 77.4, 76.1, 55.8, 53.6, 38.3, 32.1, 29.8, 29.5, 29.0, 22.8, 14.2, 13.6, 1.2.

**HRMS** ( $\text{Na}^+$ ,  $m/z$ ): for  $\text{C}_{29}\text{H}_{24}\text{ClN}_3\text{O}_8$  calcd. = 600.1144; found = 600.1132.

**FTIR** (neat): 2970, 2931, 2839, 1718, 1540, 1476, 1342, 1094, 797  $\text{cm}^{-1}$ .

$[\alpha]_D^{24} = +80.0$  ( $c = 0.25$ ,  $\text{CHCl}_3$ )

**MP**: 127-131°C

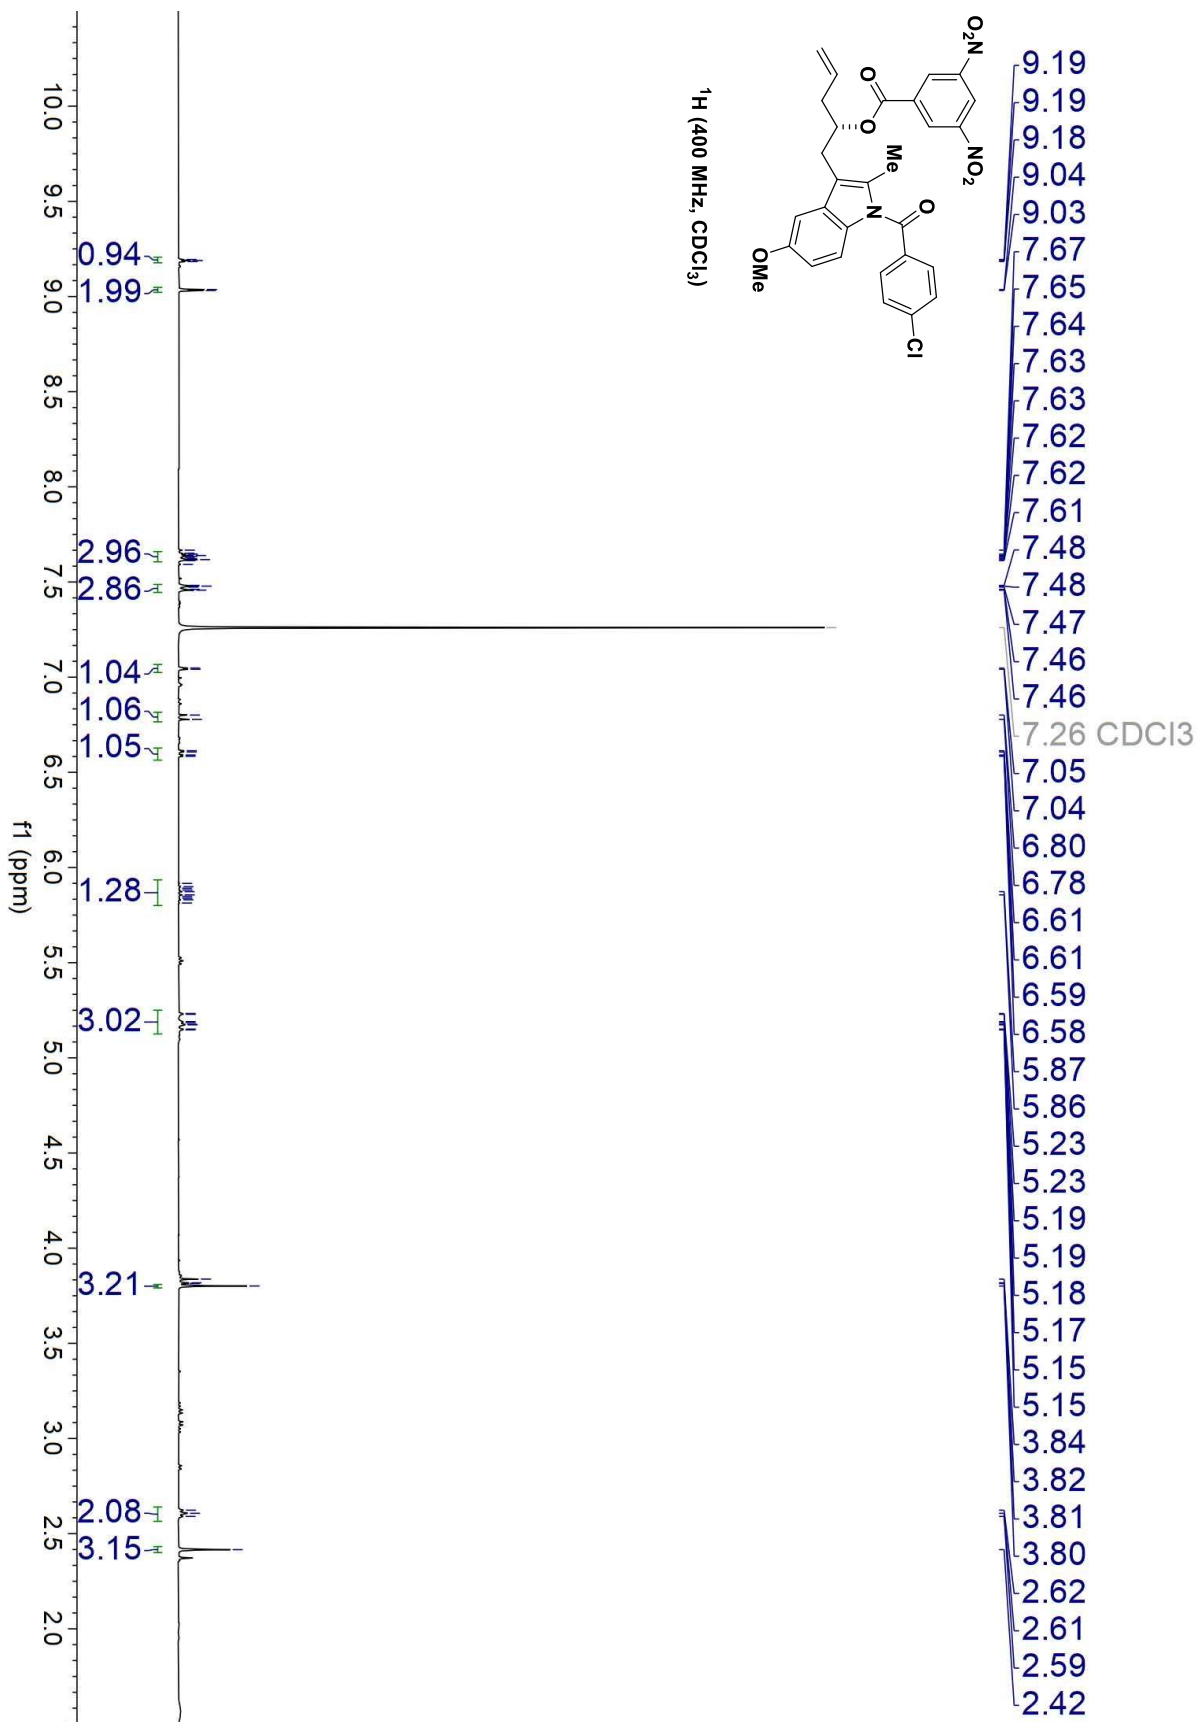

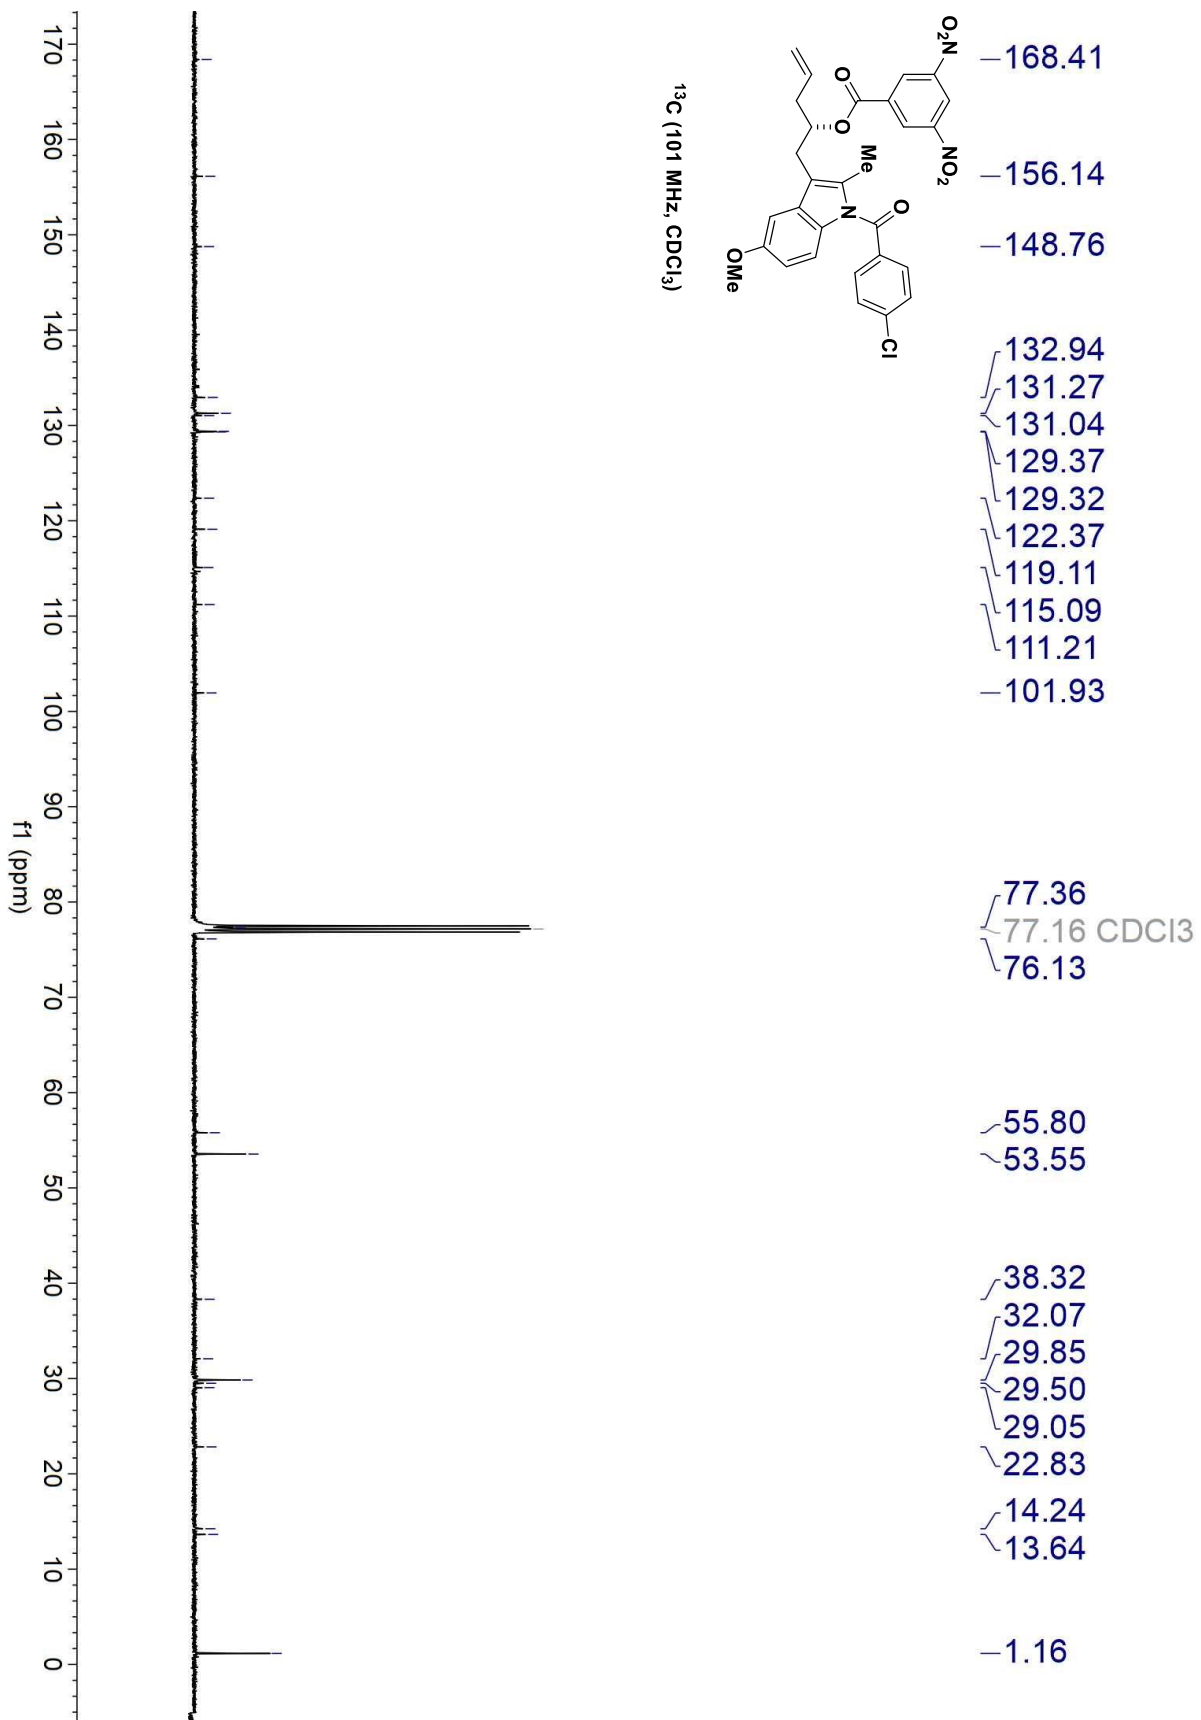

## Synthesis of C7-C15 of Spirastrellolide A (**4a**, **4b**, **5**, **6**)

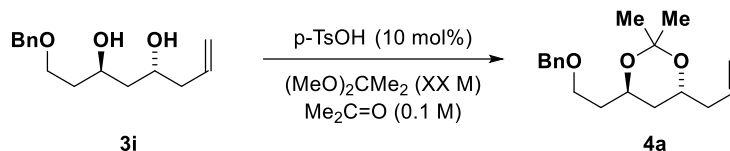

To a 50 mL flame-dried round-bottom flask equipped with a magnetic stir bar were added *p*-toluenesulfonic Acid (PTSA) (25 mg, 0.14 mmol, 10 mol%), and **3i** (345 mg, 1.4 mmol, 100 mol%) in anhydrous acetone (15 mL, 0.1 M) under an atmosphere of argon. The reaction vessel was stirred at ambient temperature for 16 hours, at which point the reaction was filtered and concentrated in vacuo. The residue was subjected to silica gel column chromatography (3:97 EtOAc/Hexanes) to afford the title compound **4a** as a yellow oil in 85% yield (345.6 mg, 1.19 mmol). All spectral data were found to be in accordance with the literature values.<sup>10</sup>

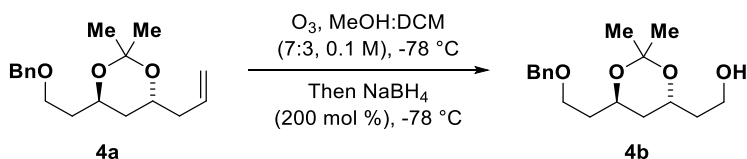

To a 25 mL round-bottomed flask equipped with a magnetic stir bar under an argon atmosphere were added methanol:dichloromethane (7:3 v/v, 10 mL, 0.1 M) and **4a** (289 mg, 1.0 mmol, 100 mol%). The reaction mixture was cooled to  $-78^\circ\text{C}$  and subjected to a stream of  $\text{O}_3/\text{O}_2$  ( $\sim 1$  mmol/min of  $\text{O}_3$ ) through a glass pipet for 20 minutes. Upon which a stream of  $\text{N}_2$  was sparged through the reaction mixture via a glass pipet for 10 minutes. The reaction mixture was maintained at  $-78^\circ\text{C}$ ,  $\text{NaBH}_4$  (75.6 mg, 2.0 mmol, 200 mol%) was added and the reaction mixture was allowed to reach room temperature and stir for 16 hours. The solvent was concentrated in vacuo and the residue was subjected to flash chromatography ( $\text{SiO}_2$ : 5:95 EtOAc/Hexanes) to furnish the title compound **4b** as a yellow oil in 82% yield (241.4 mg, 0.82 mmol). All spectral data were found to be in accordance with the literature values.<sup>10</sup>

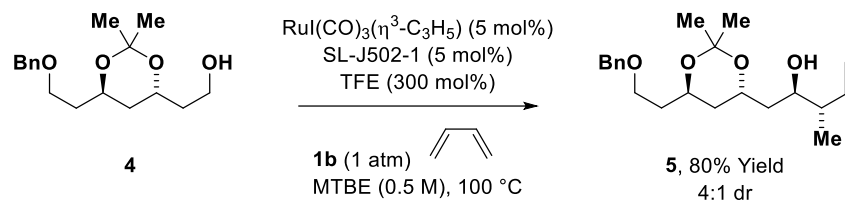

An oven-dried pressure tube equipped with a magnetic stir bar was charged with alcohol **4** (30.0 mg, 0.1 mmol, 100 mol%),  $\text{RuI}(\text{CO})_3(\eta^3\text{-C}_3\text{H}_5)$  (3.6 mg, 5 mol%), SL-J502-1 (5.4 mg, 5 mol%) under an argon atmosphere. The atmosphere was evacuated and backfilled with butadiene **1b** (1 atm), followed by the addition of trifluoroethanol (43  $\mu\text{L}$ , 0.6 mmol, 300 mol%) and MTBE (0.4 mL, 0.5 M). The reaction mixture was cooled to 0 °C and allowed to stir for 5 minutes. The tube was sealed with a PTFE lined cap and the reaction vessel was placed in a 100 °C bath and stirred for 48 hours. After reaching ambient temperature, the solvent was removed in vacuo and the residue was subjected to flash chromatography ( $\text{SiO}_2$ : 2:98 EtOAc/Hexanes) to furnish the title compound **5** as an orange oil in 80% yield (28.0 mg, 0.080 mmol, 4:1 dr). Diastereomeric ratios were determined by  $^1\text{H}$  NMR of crude reaction mixtures.

**TLC ( $\text{SiO}_2$ ):**  $R_f$  = 0.45 (1:2 EtOAc:Hexanes)

**$^1\text{H}$  NMR** (500 MHz,  $\text{C}_6\text{D}_6$ ):  $\delta$  7.32 – 7.28 (m, 2H), 7.19 (d,  $J$  = 7.6 Hz, 1H), 7.10 (t,  $J$  = 7.4 Hz, 2H), 5.84 – 5.76 (m, 1H), 5.03 – 4.95 (m, 2H), 4.34 (d,  $J$  = 4.4 Hz, 2H), 4.22 – 4.13 (m, 1H), 4.10 – 4.00 (m, 1H), 3.75 (dd,  $J$  = 8.6, 4.1 Hz, 1H), 3.56 – 3.48 (m, 1H), 3.44 (dt,  $J$  = 9.1, 5.8 Hz, 1H), 2.09 (h,  $J$  = 7.0 Hz, 1H), 1.95 (br s, 1H), 1.81 (tt,  $J$  = 10.7, 4.2 Hz, 1H), 1.74 (ttd,  $J$  = 11.2, 5.5, 2.5 Hz, 1H), 1.54 – 1.43 (m, 4H), 1.39 (s, 3H), 1.33 (s, 3H), 1.00 (d,  $J$  = 6.9 Hz, 3H).

**$^{13}\text{C}$  NMR** (126 MHz,  $\text{C}_6\text{D}_6$ ):  $\delta$  141.0, 128.6, 128.4, 127.7, 115.4, 100.5, 73.2, 71.0, 66.9, 64.3, 64.1, 44.8, 40.1, 38.6, 36.7, 25.1, 25.0, 16.2.

**HRMS** ( $\text{Na}^+$ ,  $m/z$ ): for  $\text{C}_{21}\text{H}_{32}\text{O}_4$  calcd. = 371.2193; found = 371.2199.

**FTIR** (neat): 2937, 1379, 1223, 1167, 1100, 908, 736, 697  $\text{cm}^{-1}$ .

$[\alpha]_D^{24}$  = -22.0 ( $c$  = 0.25,  $\text{CHCl}_3$ )

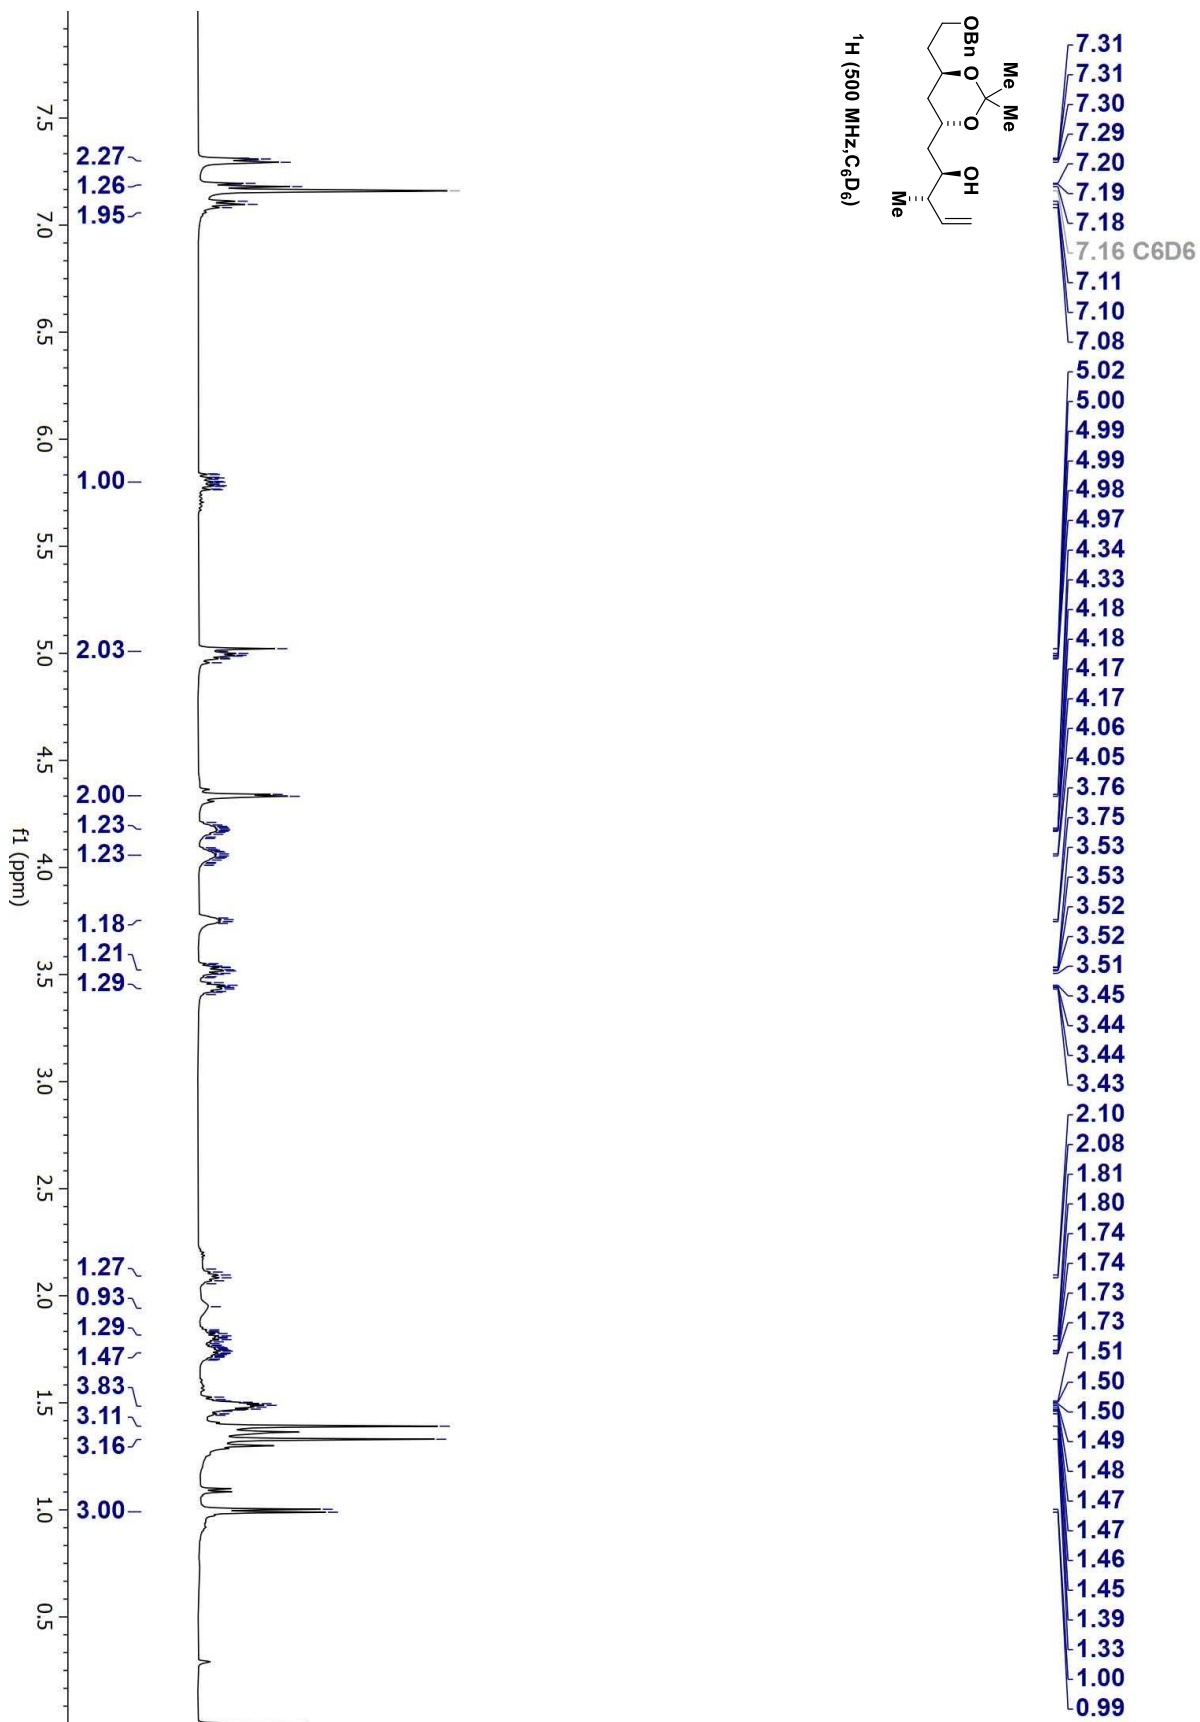

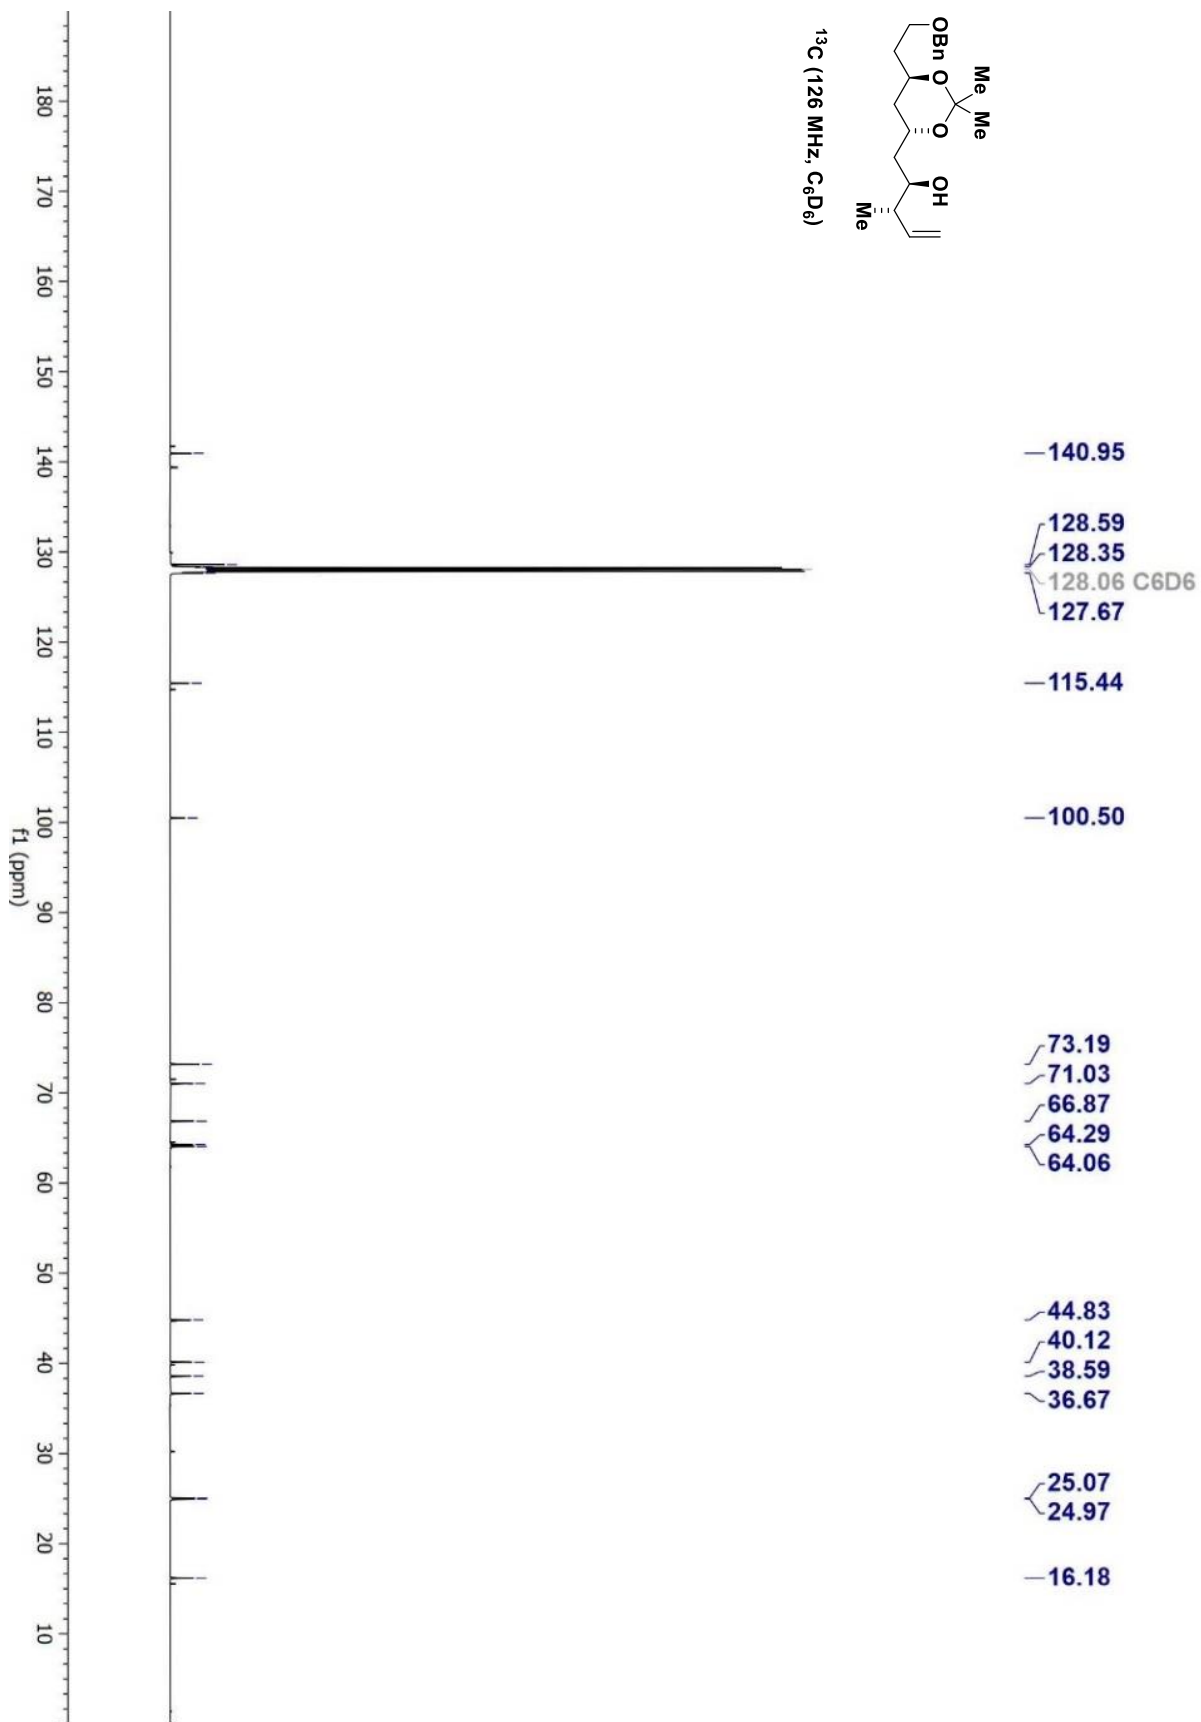



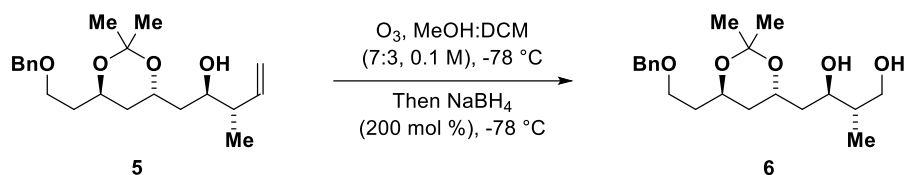

To a 12 mL scintillation vial equipped with a magnetic stir bar under an argon atmosphere were added methanol:dichloromethane (7:3 v/v, 1.2 mL, 0.1 M) and **5** (20 mg, 0.057 mmol, 100 mol%). The reaction mixture was cooled to  $-78^\circ\text{C}$  and subjected to a stream of  $\text{O}_3/\text{O}_2$  ( $\sim 1$  mmol/min of  $\text{O}_3$ ) through a glass pipet for 10 minutes. Upon which a stream of  $\text{N}_2$  was sparged through the reaction mixture via a glass pipet for 10 minutes. The reaction mixture was maintained at  $-78^\circ\text{C}$ ,  $\text{NaBH}_4$  (4.3 mg, 0.114 mmol, 200 mol%) was added and the reaction mixture was allowed to reach room temperature and stir for 16 hours. The reaction mixture was diluted with EtOAc (10 mL) and  $\text{NH}_4\text{Cl}$  (10 mL) was added. The reaction mixture was transferred to a separatory funnel and the organic layer was washed with deionized water (3 x 10 mL). The combined organic extracts were dried ( $\text{Na}_2\text{SO}_4$ ), filtered and concentrated *in vacuo*. The resulting residue was subjected to flash chromatography ( $\text{SiO}_2$ : 5:95 EtOAc/Hexanes) to furnish the title compound **6** as a yellow oil in 72% yield (14.5 mg, 0.041 mmol).

**TLC ( $\text{SiO}_2$ ):**  $R_f = 0.2$  (1:1 EtOAc:Hexanes)

**$^1\text{H NMR}$**  (500 MHz,  $\text{C}_6\text{D}_6$ ):  $\delta$  7.3 (d,  $J = 7.4$  Hz, 2H), 7.2 (d,  $J = 7.5$  Hz, 1H), 7.1 – 7.1 (m, 2H), 4.3 (d,  $J = 4.0$  Hz, 2H), 4.1 (d,  $J = 11.7$  Hz, 1H), 4.0 (tt,  $J = 9.6, 5.6$  Hz, 1H), 3.8 (d,  $J = 8.4$  Hz, 1H), 3.7 (d,  $J = 11.5$  Hz, 1H), 3.6 (q,  $J = 8.5$  Hz, 1H), 3.5 (dtd,  $J = 41.2, 9.2, 5.6$  Hz, 1H), 1.8 (dddd,  $J = 26.6, 12.9, 9.3, 5.5$  Hz, 3H), 1.6 (dp,  $J = 10.7, 3.0$  Hz, 1H), 1.5 (dd,  $J = 7.5, 3.7$  Hz, 2H), 1.3 (s, 3H), 1.3 (s, 3H), 0.7 (dd,  $J = 6.9, 1.7$  Hz, 3H).

**$^{13}\text{C NMR}$**  (126 MHz,  $\text{C}_6\text{D}_6$ ):  $\delta$  139.3, 128.6, 128.4, 127.7, 100.7, 73.2 (d,  $J = 2.2$  Hz), 66.7, 64.6, 64.0, 40.6, 40.0, 38.2, 36.6, 30.2, 25.0, 24.8, 14.0.

**HRMS** ( $\text{Na}^+$ ,  $m/z$ ): for  $\text{C}_{20}\text{H}_{32}\text{O}_5$  calcd. = 375.2142; found = 375.2143.

**FTIR** (neat): 2957, 1660, 1592, 1573, 1511, 1257, 1172, 733  $\text{cm}^{-1}$ .

$[\alpha]_D^{24} = +4.5$  ( $c = 0.23$ ,  $\text{CHCl}_3$ )

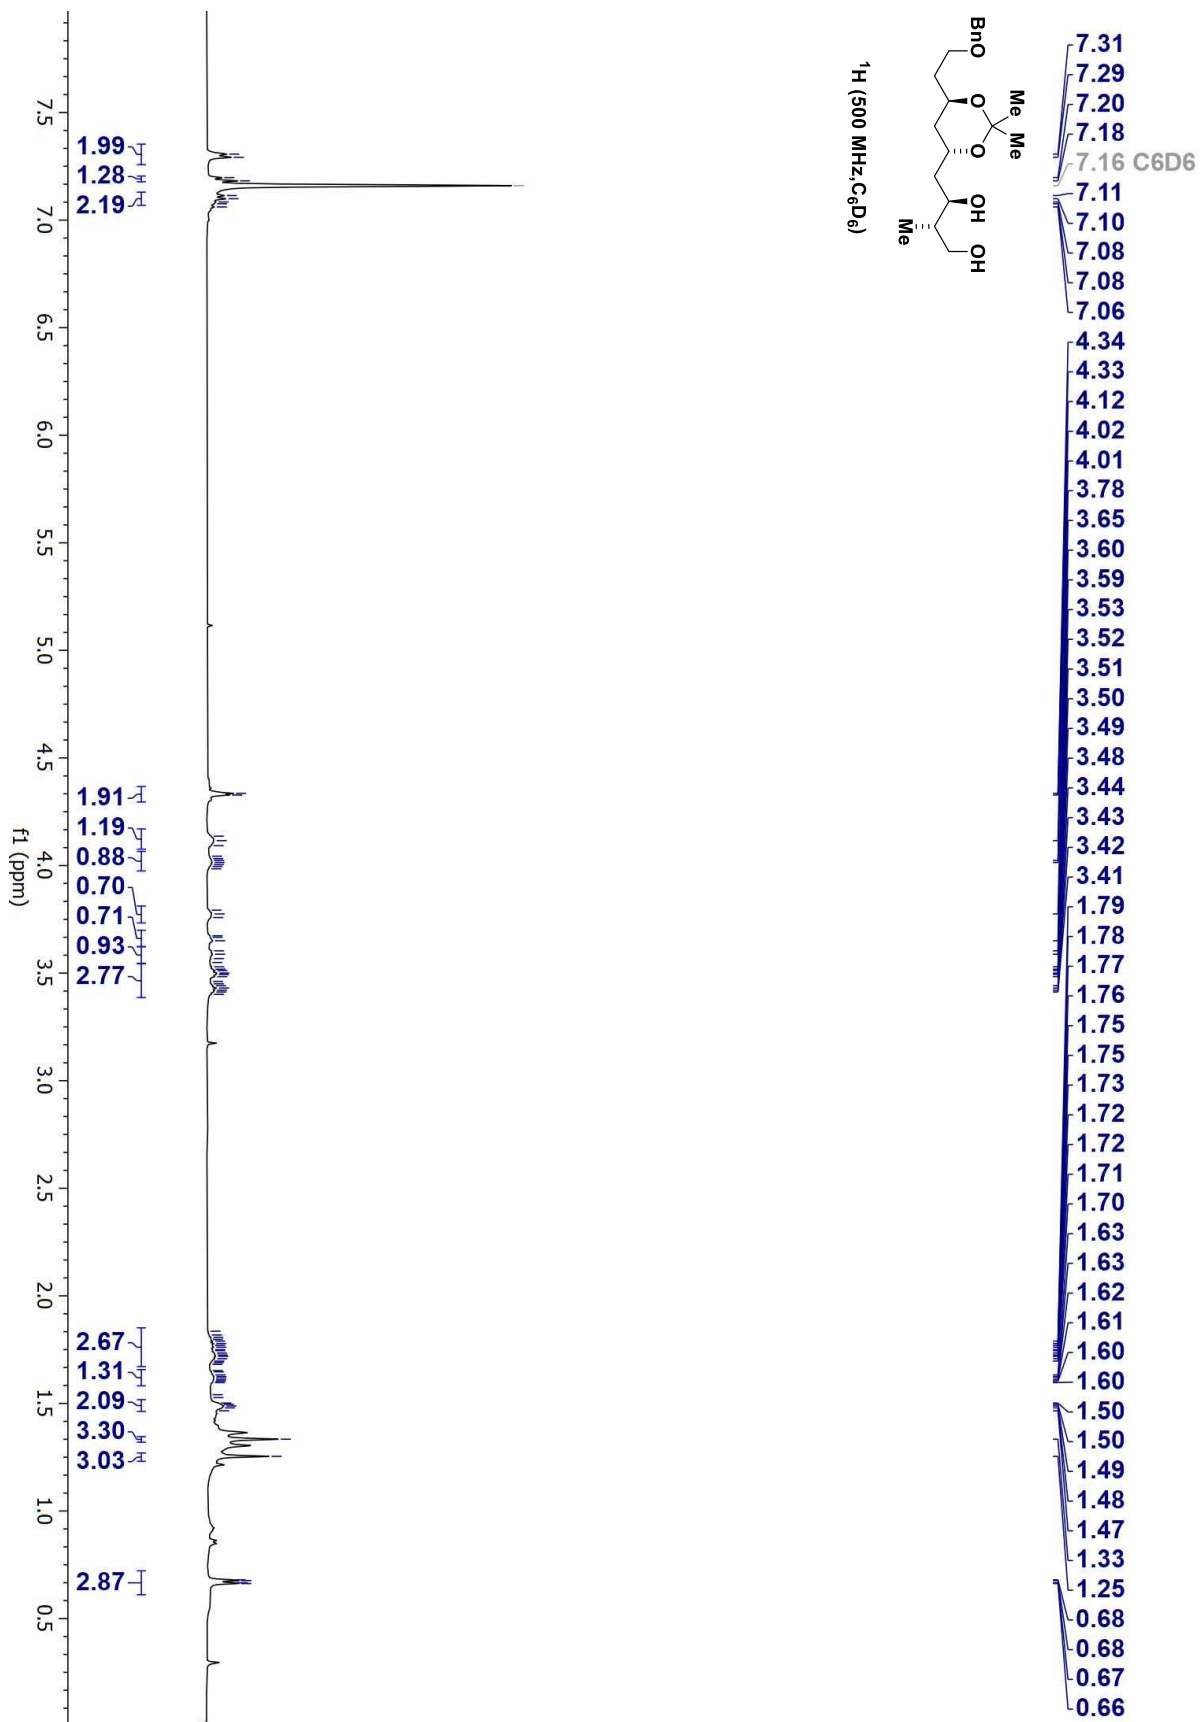

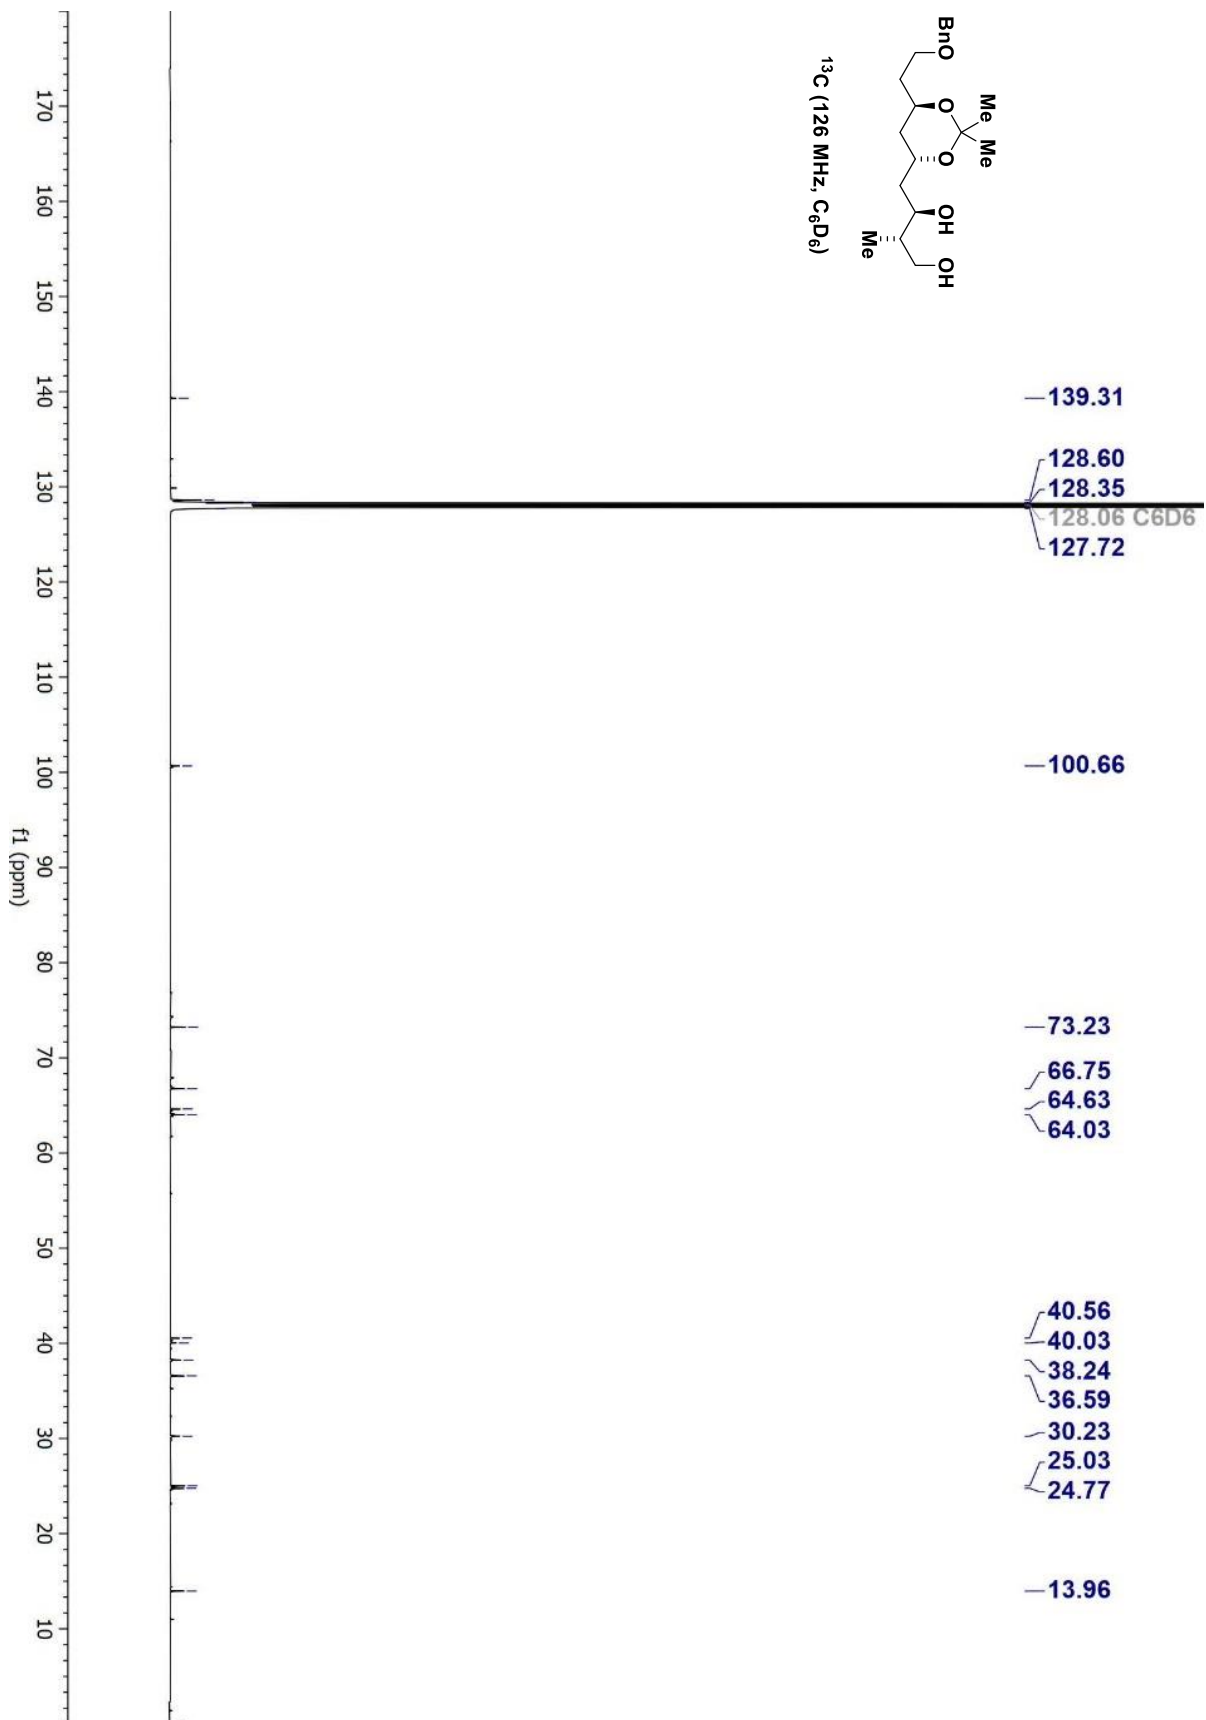

## Single Crystal Diffraction Data for 3g-(3,5-dinitrobenzoate):

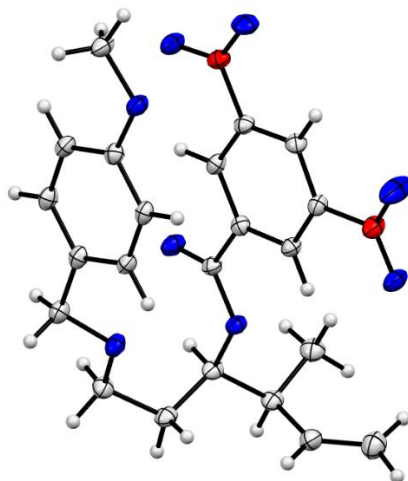

Crystals grew as colorless prisms by slow evaporation from hexanes and ether. The data crystal was cut from a longer crystal and had approximate dimensions; 0.23 x 0.16 x 0.11 mm. The data were collected on a Rigaku Oxford Diffraction HyPix6000E Synergy-S diffractometer using a  $\mu$ -focus Cu K $\alpha$  radiation source ( $\lambda = 1.5418\text{\AA}$ ) with collimating mirror monochromators. A total of 3224 frames of data were collected using  $\omega$ -scans with a scan range of  $0.5^\circ$  and a counting time of 7 seconds per frame for frames collected with a detector offset of  $\pm 48.3^\circ$  and 28 seconds per frame with frames collected with a detector offset of  $111.0^\circ$ . The data were collected at 100 K using an Oxford Cryostream low temperature device. Details of crystal data, data collection and structure refinement are listed in Table S1. Data collection, unit cell refinement and data reduction were performed using Rigaku Oxford Diffraction's CrysAlisPro V 1.171.41.123a.<sup>1</sup> The structure was solved by direct methods using SHELXT<sup>2</sup> and refined by full-matrix least-squares on  $F^2$  with anisotropic displacement parameters for the non-H atoms using SHELXL-2018/3.<sup>3</sup> Structure analysis was aided by use of the programs PLATON<sup>4</sup> and OLEX2.<sup>5</sup> The hydrogen atoms on the carbon atoms were calculated in ideal positions with isotropic displacement parameters set to  $1.2 \times U_{eq}$  of the attached atom ( $1.5 \times U_{eq}$  for methyl groups). The absolute structure was determined using the method of Flack<sup>6</sup> and confirmed using the Hooft  $\gamma$ -parameter method, which resulted in a Hooft  $\gamma$ -parameter of 0.03(3).<sup>7</sup>

X-ray Experimental for  $C_{29}H_{24}N_3O_8Cl$ : Crystals grew as clusters of yellowish needles by slow evaporation from hexanes and ether. The data crystal was cut from a longer crystal and had approximate dimensions; 0.22 x 0.083 x 0.054 mm. The data were collected on a Rigaku Oxford Diffraction HyPix6000E Synergy-S diffractometer using a  $\mu$ -focus Cu  $K\alpha$  radiation source ( $\lambda = 1.5418\text{\AA}$ ) with collimating mirror monochromators. A total of 4162 frames of data were collected using  $\omega$ -scans with a scan range of  $0.5^\circ$  and a counting time of 13 seconds per frame for frames collected with a detector offset of  $\pm 47.8^\circ$  and 42 seconds per frame with frames collected with a detector offset of  $104.5^\circ$ . The data were collected at 100 K using an Oxford Cryostream low temperature device. Details of crystal data, data collection and structure refinement are listed in Table 1. Data collection, unit cell refinement and data reduction were performed using Rigaku Oxford Diffraction's CrysAlisPro V 1.171.41.123a. The structure was solved by direct methods using SHELXT and refined by full-matrix least-squares on F2 with anisotropic displacement parameters for the non-H atoms using SHELXL-2018/3. Structure analysis was aided by use of the programs PLATON and OLEX2. The hydrogen atoms on the carbon atoms were calculated in ideal positions with isotropic displacement parameters set to  $1.2 \times U_{eq}$  of the attached atom. The crystal was twinned by a  $180^\circ$  rotation about the 100 direct cell axis. The twin law was determined to be (1,0,0; 0,-1,0;-0.251,0,1). The absolute structure was determined using the method of Flack and confirmed using the Hooft  $\gamma$ -parameter method, which resulted in a Hooft  $\gamma$ -parameter of 0.009(2).

The function,  $\sum w(|F_o|^2 - |F_c|^2)^2$ , was minimized, where  $w = 1/[(\sigma(F_o))^2 + (0.853P)^2 + (3.486*P)]$  and  $P = (|F_o|^2 + 2|F_c|^2)/3$ .  $R_w(F2)$  refined to 0.173, with  $R(F)$  equal to 0.0640 and a goodness of fit,  $S$ , = 1.08. Definitions used for calculating  $R(F)$ ,  $R_w(F2)$  and the goodness of fit,  $S$ , are given below. The data were checked for secondary extinction effects but no correction was necessary. Neutral atom scattering factors and values used to calculate the linear absorption coefficient are from the International Tables for X-ray Crystallography (1992). All figures were generated using SHELXTL/PC. Tables of positional and thermal parameters, bond lengths and angles, torsion angles and figures are found elsewhere.

Table S1. Crystal data and structure refinement for 1.

|                                         |                                                                  |                   |
|-----------------------------------------|------------------------------------------------------------------|-------------------|
| <b>Empirical formula</b>                | C <sub>29</sub> H <sub>24</sub> Cl N <sub>3</sub> O <sub>8</sub> |                   |
| <b>Formula weight</b>                   | 577.96                                                           |                   |
| <b>Temperature</b>                      | 99.9(7) K                                                        |                   |
| <b>Wavelength</b>                       | 1.54184 Å                                                        |                   |
| <b>Crystal system</b>                   | monoclinic                                                       |                   |
| <b>Space group</b>                      | P 1 21 1                                                         |                   |
| <b>Unit cell dimensions</b>             | a = 6.91979(14) Å                                                | a = 90°.          |
|                                         | b = 20.7100(4) Å                                                 | b = 92.6374(17)°. |
|                                         | c = 18.9205(3) Å                                                 | g = 90°.          |
| <b>Volume</b>                           | 2708.60(9) Å <sup>3</sup>                                        |                   |
| <b>Z</b>                                | 4                                                                |                   |
| <b>Density (calculated)</b>             | 1.417 Mg/m <sup>3</sup>                                          |                   |
| <b>Absorption coefficient</b>           | 1.745 mm <sup>-1</sup>                                           |                   |
| <b>F(000)</b>                           | 1200                                                             |                   |
| <b>Crystal size</b>                     | 0.22 x 0.083 x 0.054 mm <sup>3</sup>                             |                   |
| <b>Theta range for data collection</b>  | 2.338 to 76.590°.                                                |                   |
| <b>Index ranges</b>                     | -8<=h<=8, -25<=k<=25, -23<=l<=23                                 |                   |
| <b>Reflections collected</b>            | 17131                                                            |                   |
| <b>Independent reflections</b>          | 17131                                                            |                   |
| <b>Completeness to theta = 67.684°</b>  | 99.9 %                                                           |                   |
| <b>Absorption correction</b>            | Semi-empirical from equivalents                                  |                   |
| <b>Max. and min. transmission</b>       | 1.000 and 0.70505                                                |                   |
| <b>Refinement method</b>                | Full-matrix least-squares on F <sup>2</sup>                      |                   |
| <b>Data / restraints / parameters</b>   | 17131 / 1 / 744                                                  |                   |
| <b>Goodness-of-fit on F<sup>2</sup></b> | 1.080                                                            |                   |
| <b>Final R indices [I&gt;2sigma(I)]</b> | R1 = 0.0640, wR2 = 0.1719                                        |                   |
| <b>R indices (all data)</b>             | R1 = 0.0654, wR2 = 0.1730                                        |                   |
| <b>Absolute structure parameter</b>     | 0.06(2)                                                          |                   |
| <b>Extinction coefficient</b>           | n/a                                                              |                   |
| <b>Largest diff. peak and hole</b>      | 0.408 and -0.323 e.Å <sup>-3</sup>                               |                   |

Figure S1. View of molecule 1 in **3g-dinitrobenzoate** showing the atom labeling scheme. Displacement ellipsoids are scaled to the 50% probability level.

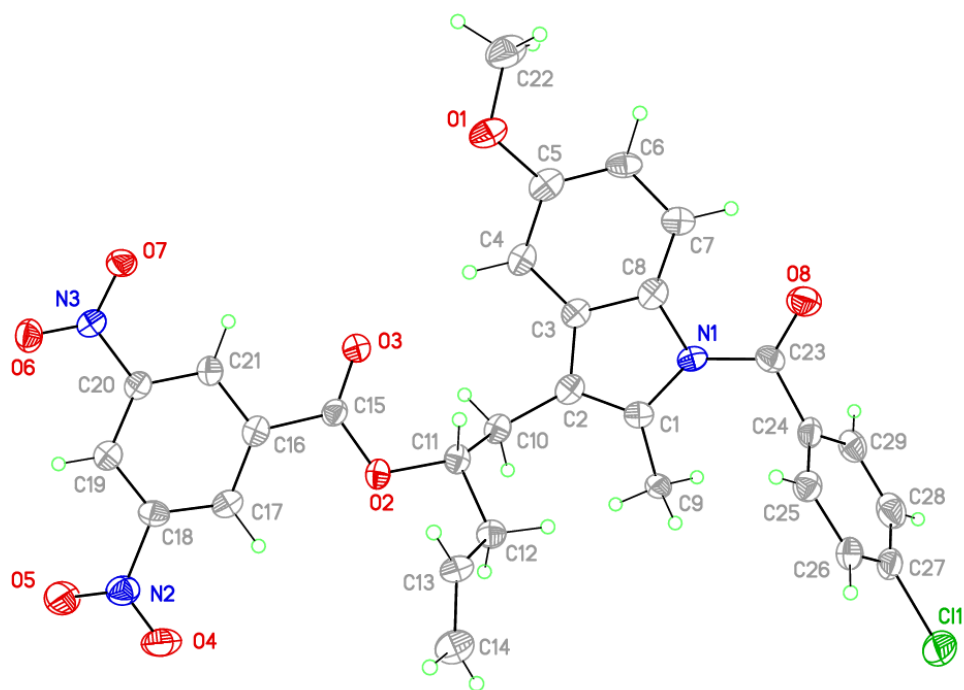

Figure S2. View of molecule 2 in **3g-dinitrobenzoate** showing the atom labeling scheme. Displacement ellipsoids are scaled to the 50% probability level.

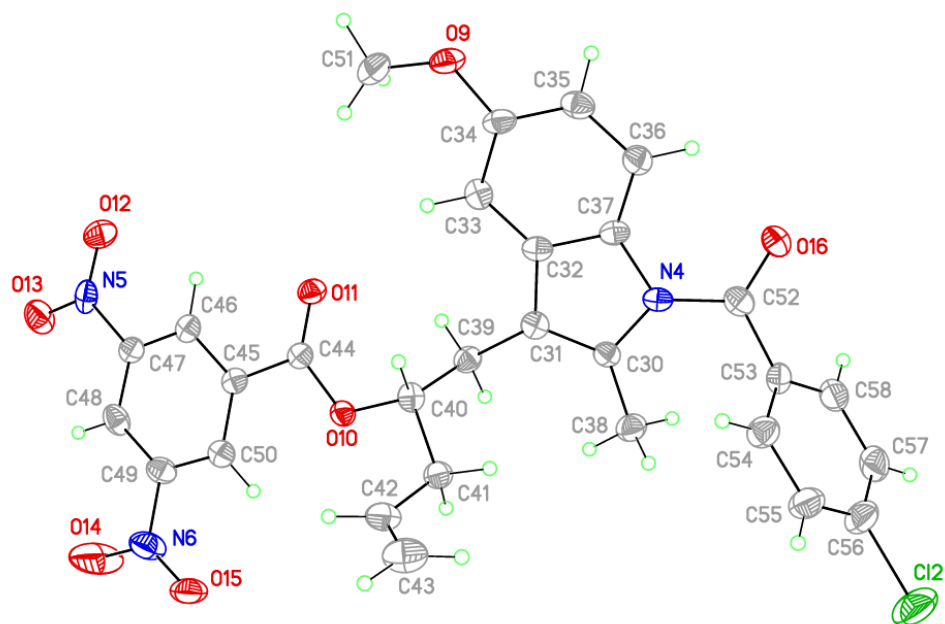



## References

- 1) Chen, F.; Chen, K.; Zhang, Y.; He, Y.; Wang, Y.-M.; Zhu, S. Remote Migratory Cross-Electrophile Coupling and Olefin Hydroarylation Reactions Enabled by in Situ Generation of NiH. *J. Am. Chem. Soc.* **2017**, *139*, 13929-13935.
- 2) Radi, S.; Salhi, S.; Radi, A. Synthesis and Preliminary Biological Activity of Some New Pyrazole Derivatives as Acyclonucleoside Analogues. *Letts. Drug Des. Discov.* **2010**, *7*, 27–30.
- 3) Cao, H.-Q.; Liu, H.-N.; Liu, Z.-Y.; Qiao, B.; Zhang, F.-G.; Ma, J.-A. Silver-Promoted Direct Phosphorylation of Bulky C(sp<sup>2</sup>)–H Bond to Build Fully Substituted β-Phosphonodehydroamino Acids. *Org. Lett.* **2020**, *22*, 6414-6419.
- 4) Dechert-Schmitt, A.-M.R., Schmitt, D.C. and Krische, M.J. Protecting-Group-Free Diastereoselective C-C Coupling of 1,3-Glycols and Allyl Acetate through Site-Selective Primary Alcohol Dehydrogenation. *Angew. Chem. Int. Ed.* **2013**, *52*, 3195-3198.
- 5) White, J. D.; Johnson, A. T. Synthesis of the Aliphatic Depside (+)-Bourgeanic Acid. *J. Org. Chem.* **1994**, *59*, 3347–3358.
- 6) Ortiz, E.; Spinello, B. J.; Cho, Y.; Wu, J.; Krische, M. J. Stereo- and Site-Selective Crotylation of Alcohol Proelectrophiles via Ruthenium-Catalyzed Hydrogen Auto-Transfer Mediated by Methylallene and Butadiene. *Angew. Chem. Int. Ed.* **2022**, *61*, e202212814.
- 7) Hamer, R. R. L.; Tegeler, J. J.; Kurtz, E. S.; Allen, S. C.; Elliott, M. E.; Hellyer, L.; Helsley, G. C.; Przekop, P.; Freed, B. S.; White, J.; Martin, L. L. Dibenzoxepinone Hydroxylamines and Hydroxamic Acids: Dual Inhibitors of Cyclooxygenase and 5-Lipoxygenase with Potent Topical Antiinflammatory Activity. *J. Med. Chem.* **1996**, *39*, 246–252.
- 8) Wu, Y.; Liu, M.-J.; Huang, H.-Q.; Huang, G.-X.; Xiong, F.-J.; Chen, F.-E. Asymmetric Synthesis of Atorvastatin Calcium through Intramolecular Oxidative Oxygen-Nucleophilic Bromocyclization. *Eur. J. Org. Chem.* **2017**, *25*, 3681–3688.
- 9) Kim, S. W.; Meyer, C.C.; Mai, B. K.; Liu, P.; Krische, M. J. Inversion of Enantioselectivity in Allene Gas versus Allyl Acetate Reductive Aldehyde Allylation Guided by Metal-Centered Stereogenicity: An Experimental and Computational Study. *ACS Catal.* **2019**, *9*, 9158-9163.
- 10) Hassan, A.; Lu, Y.; Krische, M. J. Elongation of 1,3-Polyols via Iterative Catalyst-Directed Carbonyl Allylation from the Alcohol Oxidation Level. *Org. Lett.* **2009**, *11*, 3112-3115.
